# Supplementary material for: Photocatalytic synthesis of polyfluoroalkylated dihydropyrazoles and tetrahydropyridazines
Source: Royal Society of Chemistry journal article supplement (doi:10.1039/d4cc03384a), 2024-01-01

# Supporting Information

## Photocatalytic synthesis of polyfluoroalkylated dihydropyrazoles and tetrahydropyridazines

Lingli Liu, Chengli Xiang, Changduo Pan,\* Jin-Tao Yu\*

*Email: yujintao@cczu.edu.cn; panchangduo@jsut.edu.cn*

### Table of Contents

|                                                                                          |     |
|------------------------------------------------------------------------------------------|-----|
| 1. General Considerations                                                                | S2  |
| 2. General Synthetic Procedures                                                          | S3  |
| 3. Mechanism Studies                                                                     | S5  |
| 4. Characterization Data for the Products                                                | S11 |
| 5. Reference                                                                             | S28 |
| 6. Copies of the <sup>1</sup> H NMR, <sup>13</sup> C NMR and <sup>19</sup> F NMR Spectra | S29 |

## 1. General Considerations

**General Information:** Unless otherwise noted, all chemicals were purchased from Energy Chemical or Bidepharmatech and used without further purification. All reactions were monitored by Thin Layer Chromatography (TLC) using silica gel F254 plates. Column chromatography was performed using EM Silica gel 60 (300-400 mesh).  $^1\text{H}$  NMR and  $^{13}\text{C}$  NMR spectra were recorded at ambient temperature on a Bruker-Avance 400 MHz NMR spectrometer (101 MHz for  $^{13}\text{C}$ ). NMR experiments are reported in  $\delta$  units, parts per million (ppm), and were referenced to  $\text{CDCl}_3$  ( $\delta$  7.26 or 77.0) as the internal standard. The coupling constants  $J$  are given in Hz. High-resolution mass spectra (HRMS) were recorded on a TOF LC/MS equipped with electrospray ionization (ESI) probe operating in positive ion mode. Emission intensities were recorded using a FS5 spectrophotometer.

## 2. General Synthetic Procedures

All *N*-homoallyl and *N*-allyl aldehyde hydrazones (**1a-1p**, **4a-4r**, ) were prepared according to the previous report.<sup>1</sup> Trifluoromethyl thianthrenium triflate ( $\text{TT-CF}_3^+\text{OTf}^-$ , **2a**) was synthesized according to Ritter's work.<sup>2</sup> bis(difluoroacetoxy)iodo]benzene [ $\text{PhI}(\text{O}_2\text{CCHF}_2)_2$ ] **6a** was prepared according to literature.<sup>3</sup>

### 2.1 General procedure for the synthesis of compounds **3** and **5**:

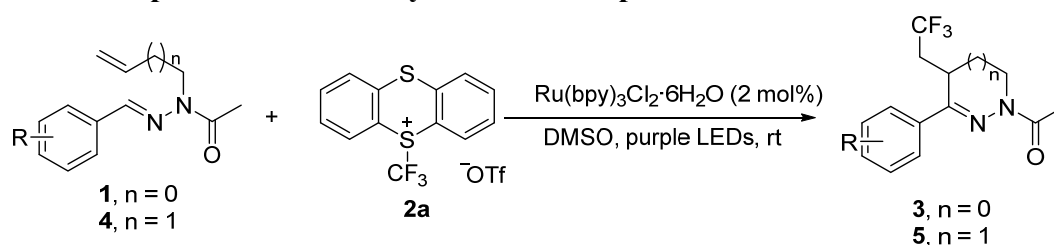

Under  $\text{N}_2$ , the mixture of (*E*)-*N*-allyl-*N'*-benzylideneacetohydrazide **1** or (*E*)-*N*-homoallyl-*N'*-benzylideneacetohydrazide **4** (0.2 mmol),  $\text{TT-CF}_3^+\text{OTf}^-$  **2a** (0.3 mmol, 1.5 equiv),  $\text{Ru}(\text{bpy})_3\text{Cl}_2 \cdot 6\text{H}_2\text{O}$  (2 mol%, 3 mg) and DMSO (2 mL) were added to a Schlenk tube. The tube was evacuated and backfilled with nitrogen (repeated five times) and then sealed. The mixture was stirred at room temperature under 400-410 nm purple LEDs for 16 hours. Then, the solvent was evaporated under reduced pressure, and the residue was purified by silica gel flash column chromatography (eluent: petroleum ether/ethyl acetate) to give the product **3** or **5**.

### 2.2 General procedure for the synthesis of compounds **7** and **8**

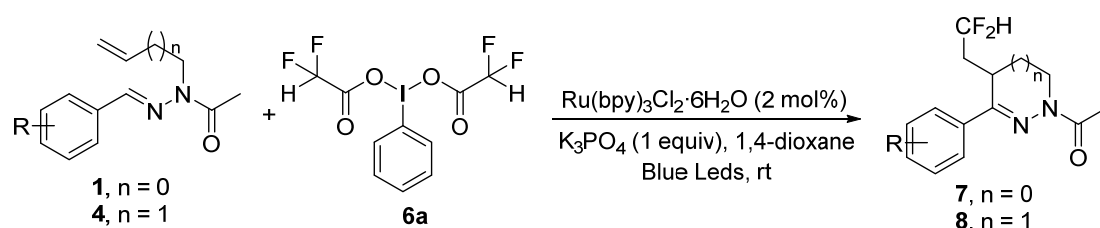

Under  $\text{N}_2$ , the mixture of (*E*)-*N*-allyl-*N'*-benzylideneacetohydrazide **1** or (*E*)-*N*-homoallyl-*N'*-benzylideneacetohydrazide **4** (0.2 mmol), [Bis(difluoroacetoxy)iodo]benzene **6a** (0.4 mmol, 2 equiv),  $\text{Ru(bpy)}_3\text{Cl}_2 \cdot 6\text{H}_2\text{O}$  (2 mol%, 3 mg),  $\text{K}_3\text{PO}_4$  (0.2 mmol) and 1,4-dioxane (2 mL) were added to a Schlenk tube. The tube was evacuated and backfilled with nitrogen (repeated five times) and then sealed. The mixture was stirred at room temperature under 440-450 nm blue LEDs for 36 hours. Then, the solvent was evaporated under reduced pressure, and the residue was purified by silica gel flash column chromatography (eluent: petroleum ether/ethyl acetate) to obtain the product **7** or **8**.

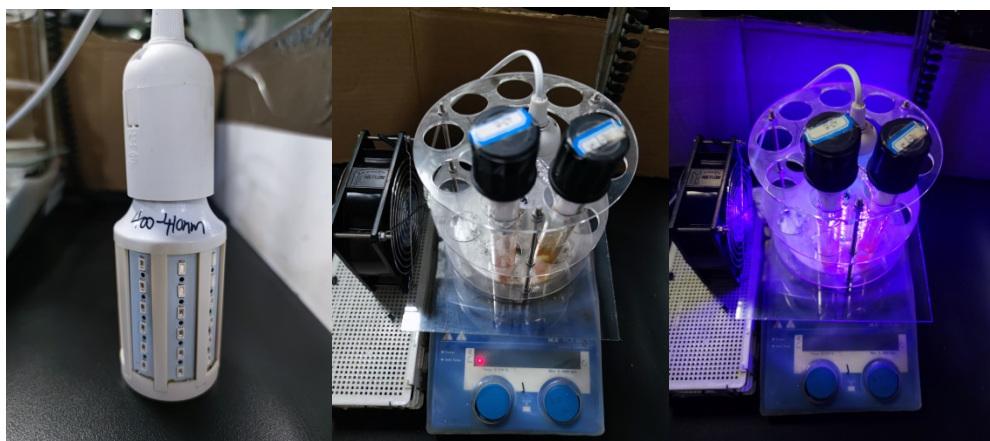

**Figure S1.** Photoreactor used in trifluoromethylation.

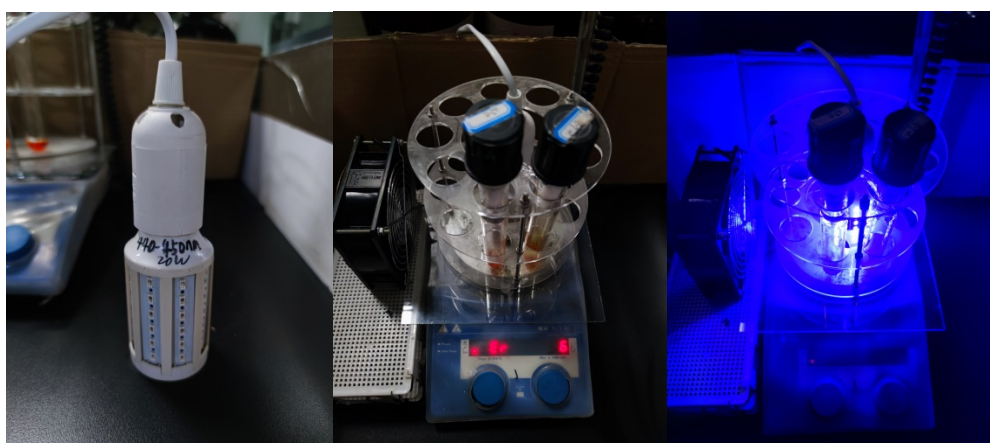

**Figure S2.** Photoreactor used in difluoromethylation.

#### The Light Source and the Material of the Irradiation Vessel:

The photochemical reaction was carried out under visible light irradiation by 20W 400-410 nm and 440-450 nm blue LED at room temperature. This blue LED was

purchased from taobao (link: [https://shop152143906.taobao.com/?spm=pc\\_detail.29232929/evo365560b447259.shop\\_block.dshopinfo.2d887dd63sZzJE](https://shop152143906.taobao.com/?spm=pc_detail.29232929/evo365560b447259.shop_block.dshopinfo.2d887dd63sZzJE)). The reaction vessel is a borosilicate glass tube. The distance between the tube and lamp is about 1.5 cm, and no filter is applied.

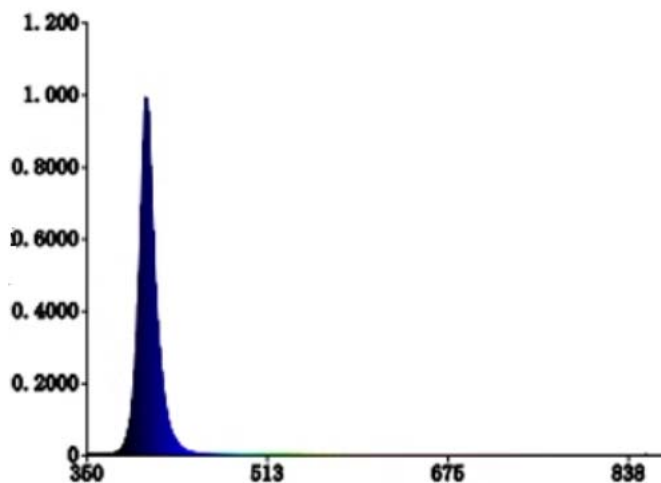

Figure S3. The spectral distribution of 20 W 400-410 nm blue LED

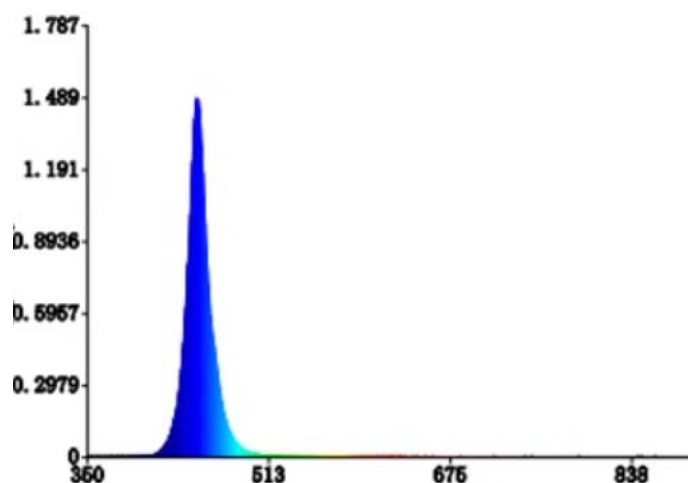

Figure S4. The spectral distribution of 20 W 440-450 nm blue LED

### 2.3 Screening the optimal reaction conditions for difluoromethylation/cyclization of *N*-allyl aldehyde hydrazone

Table S1. Screening the optimal reaction conditions for the difluoromethylation.<sup>a</sup>

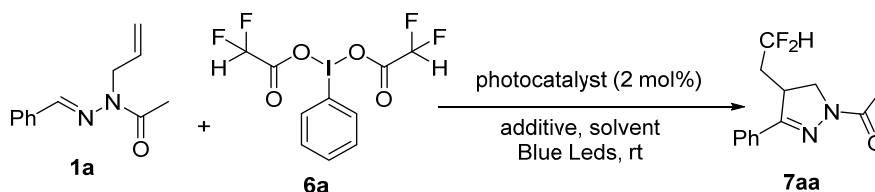

| Entry | Photocatalyst (2 mol%)                                  | Additive (1 equiv) | Solvent | Yield (%) |
|-------|---------------------------------------------------------|--------------------|---------|-----------|
| 1     | Ru(bpy) <sub>3</sub> Cl <sub>2</sub> •6H <sub>2</sub> O | -                  | MeCN    | 31        |

|           |                                                          |                                    |                    |           |
|-----------|----------------------------------------------------------|------------------------------------|--------------------|-----------|
| 2         | EosinY                                                   | -                                  | MeCN               | 27        |
| 3         | 5CzBN                                                    | -                                  | MeCN               | 11        |
| 4         | Eosin B                                                  | -                                  | MeCN               | trace     |
| 5         | Rhodamine B                                              | -                                  | MeCN               | 0         |
| 6         | ---                                                      | -                                  | MeCN               | 9         |
| 7         | Ru(bpy) <sub>3</sub> Cl <sub>2</sub> •6H <sub>2</sub> O  | -                                  | DCM                | 16        |
| 8         | Ru(bpy) <sub>3</sub> Cl <sub>2</sub> •6H <sub>2</sub> O  | -                                  | THF                | 25        |
| 9         | Ru(bpy) <sub>3</sub> Cl <sub>2</sub> •6H <sub>2</sub> O  | -                                  | Toluene            | 22        |
| 10        | Ru(bpy) <sub>3</sub> Cl <sub>2</sub> •6H <sub>2</sub> O  | -                                  | DMF                | 26        |
| <b>11</b> | <b>Ru(bpy)<sub>3</sub>Cl<sub>2</sub>•6H<sub>2</sub>O</b> | -                                  | <b>1,4-dioxane</b> | <b>41</b> |
| 12        | Ru(bpy) <sub>3</sub> Cl <sub>2</sub> •6H <sub>2</sub> O  | -                                  | EA                 | 20        |
| 13        | Ru(bpy) <sub>3</sub> Cl <sub>2</sub> •6H <sub>2</sub> O  | -                                  | Acetone            | 0         |
| 14        | <b>Ru(bpy)<sub>3</sub>Cl<sub>2</sub>•6H<sub>2</sub>O</b> | <b>K<sub>3</sub>PO<sub>4</sub></b> | <b>1,4-dioxane</b> | <b>68</b> |
| <b>15</b> | Ru(bpy) <sub>3</sub> Cl <sub>2</sub> •6H <sub>2</sub> O  | DABCO                              | 1,4-dioxane        | 43        |
| 16        | Ru(bpy) <sub>3</sub> Cl <sub>2</sub> •6H <sub>2</sub> O  | Cs <sub>2</sub> CO <sub>3</sub>    | 1,4-dioxane        | 31        |
| 17        | Ru(bpy) <sub>3</sub> Cl <sub>2</sub> •6H <sub>2</sub> O  | K <sub>2</sub> CO <sub>3</sub>     | 1,4-dioxane        | 46        |

Reaction conditions: **1a** (0.2 mmol), **6a** (0.4 mmol), Ru(bpy)<sub>3</sub>Cl<sub>2</sub>•6H<sub>2</sub>O (2 mol%), additive (1 equiv) and 1,4-dioxane (2 mL) under N<sub>2</sub> with irradiation using 20 W blue LEDs (440–450 nm) at rt for 36 h.

### 3 Mechanism Studies

#### 3.1 Radical inhibiting and trapping experiments

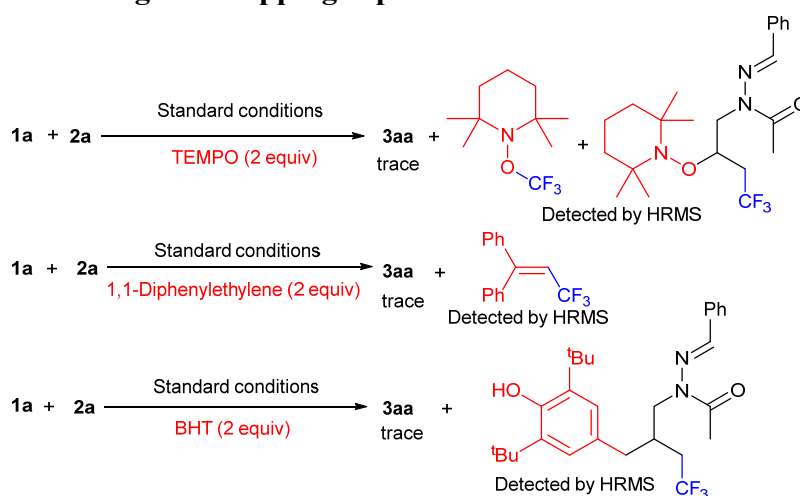

Under standard conditions, radical inhibitor TEMPO (0.4 mmol, 62.5 mg, 2 equiv), 1,1-diphenylethylene (0.4 mmol, 72.1 mg, 2 equiv) or BHT (0.4 mmol, 88.1

mg, 2 equiv) was added, the mixture was stirred at room temperature under 400-410 nm purple LEDs for 16 hours. Then, the mixture was analyzed by HRMS.

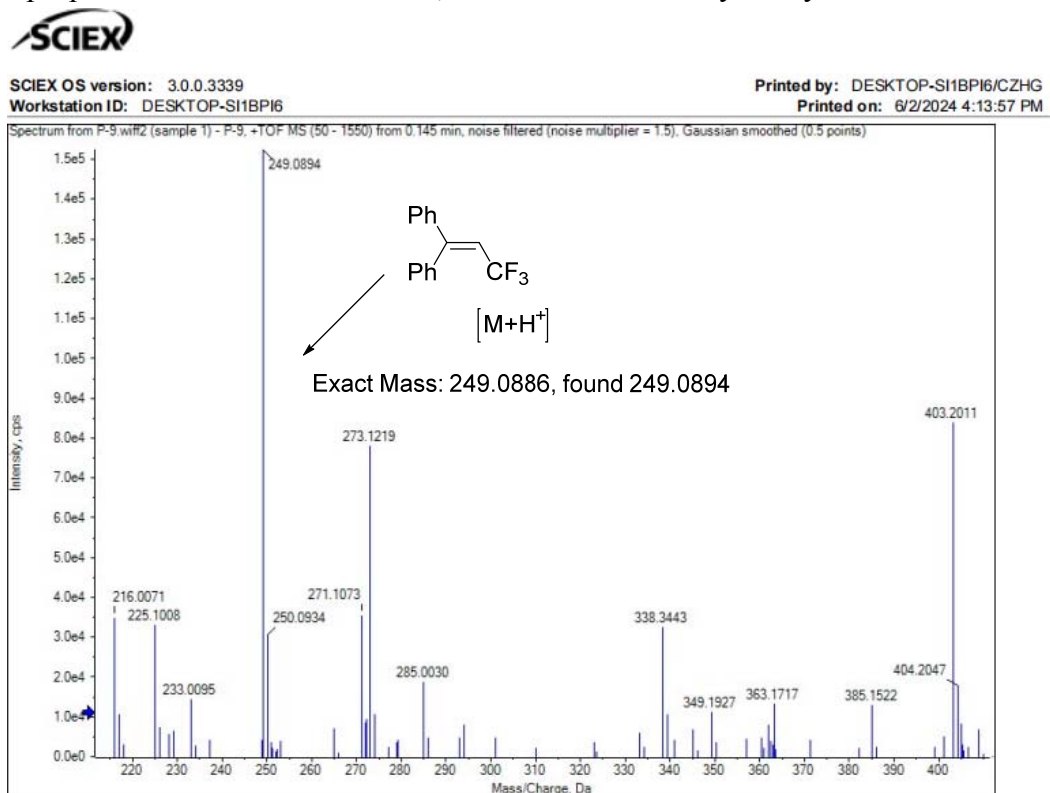

Figure S5. The HRMS spectrum for the radical-trapping experiment with 1,1-diphenylethylene.

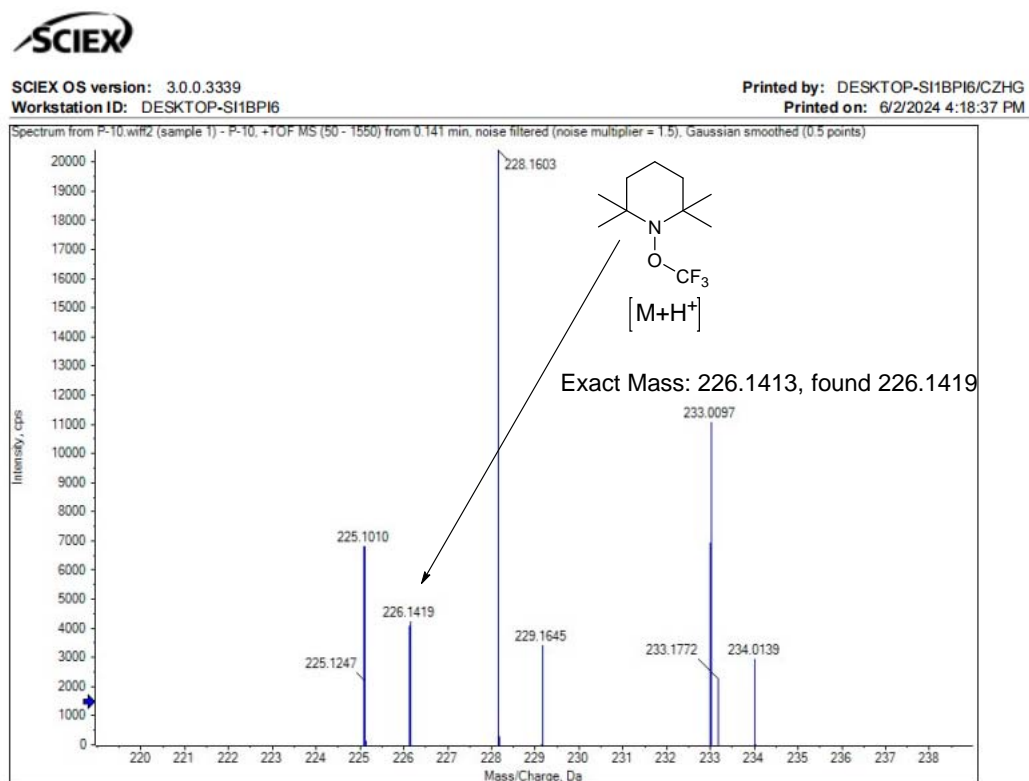

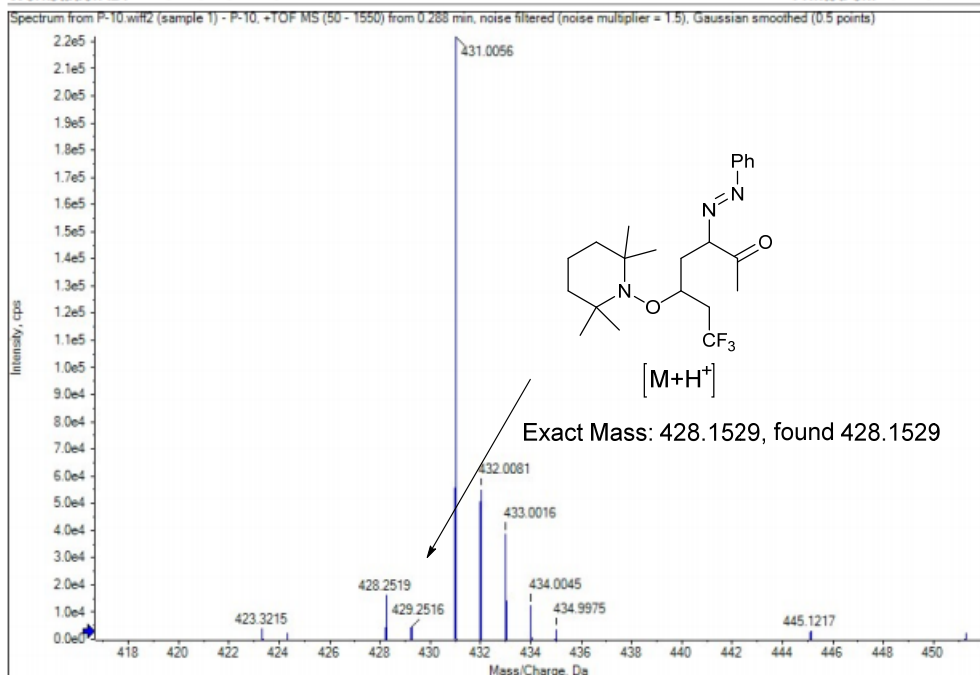

Fig

re S6. The HRMS spectrum for the radical-trapping experiment with TEMPO

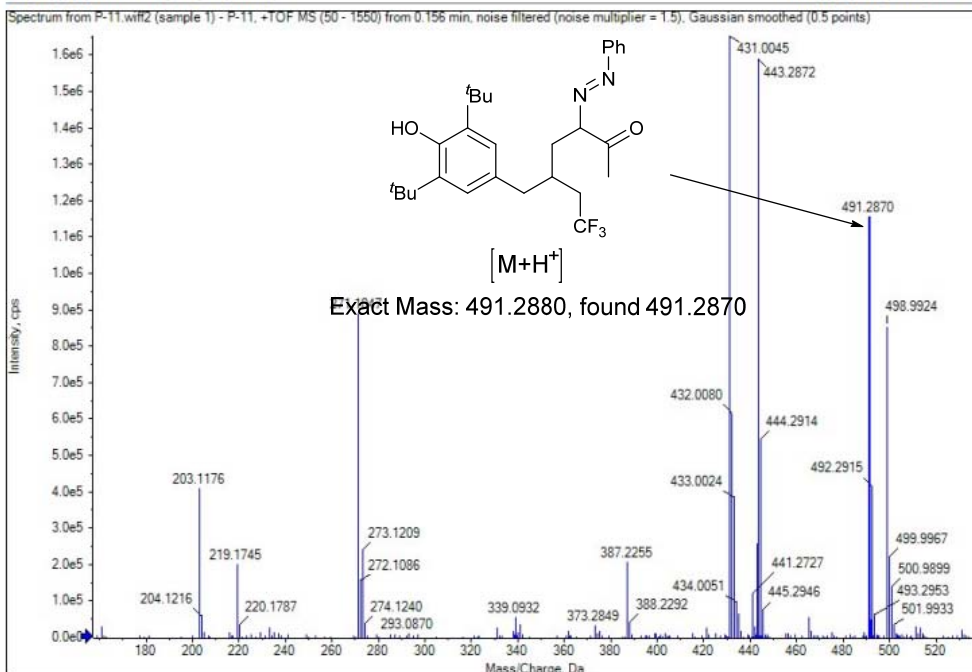

Figure S7. The HRMS spectrum for the radical-trapping experiment with BHT.

### 3.2 Fluorescence quenching experiments

Fluorescence quenching experiments were measured on an FS5 spectrophotometer with a 4 mL quartz cuvette ( $d = 1$  cm) with a cap. In a typical experiment, the emission spectrum of a  $5 \times 10^{-5}$  M solution of  $\text{Ru}(\text{bpy})_3\text{Cl}_2 \cdot 6\text{H}_2\text{O}$  with different concentrations of quencher in degassed DMSO in 10 mm path length quartz cuvette was collected after degassing with a stream of  $\text{N}_2$  for 5 minutes. Linear regression of  $I_0/I$  against concentration is done in Origin 2018 (Figure S8, S9 and S10).

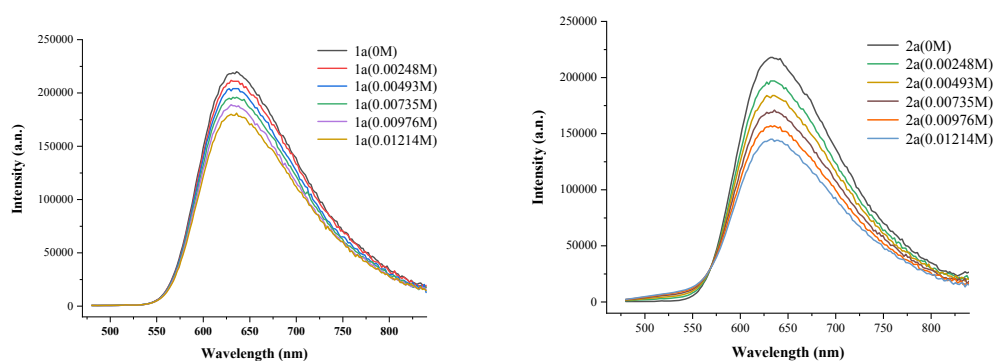

**Figure S8.** Fluorescence quenching of the excited  $\text{Ru}(\text{bpy})_3\text{Cl}_2 \cdot 6\text{H}_2\text{O}$  with different concentrations of **1a** or  $\text{TT-CF}_3^+\text{OTf}^-$  **2a** in DMSO.

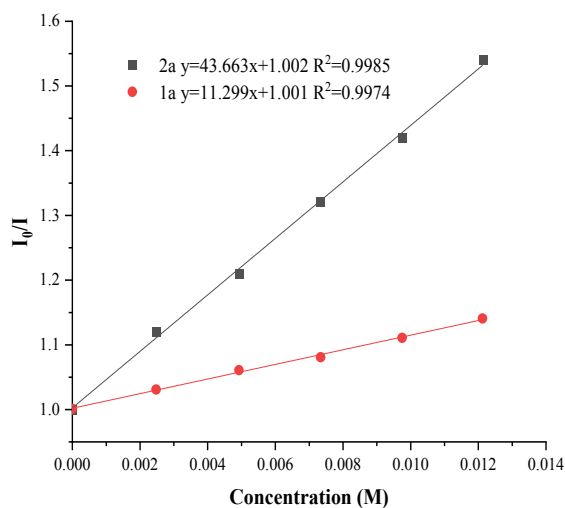

**Figure S9.** Stern-Volmer emission quenching studies of the excited  $\text{Ru}(\text{bpy})_3\text{Cl}_2 \cdot 6\text{H}_2\text{O}$  with **1a** or  $\text{TT-CF}_3^+\text{OTf}^-$  **2a** in DMSO.



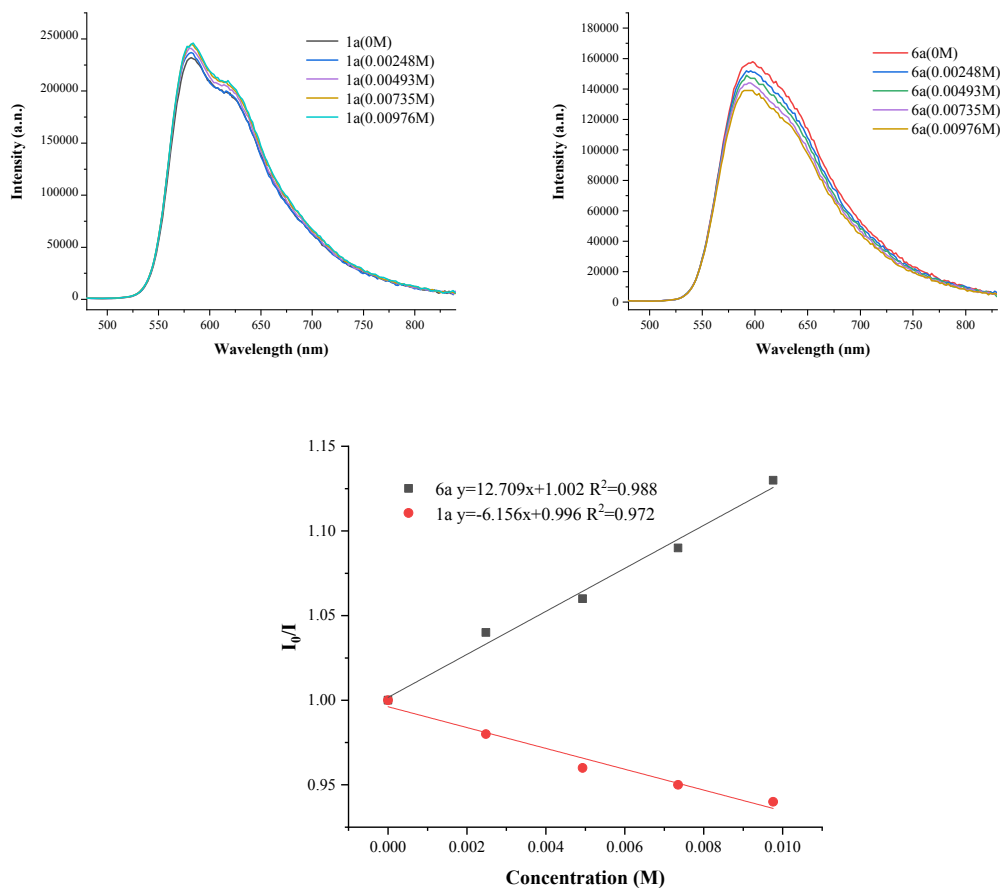

**Figure S10.** Fluorescence quenching and Stern-Volmer emission quenching studies of the excited  $\text{Ru}(\text{bpy})_3\text{Cl}_2 \cdot 6\text{H}_2\text{O}$  with **1a** or  $\text{PhI}(\text{O}_2\text{CCF}_2\text{H})_2$  **6a** in 1,4-dioxane.

### 3.3 The mechanism for difluoromethylation/cyclization of *N*-allyl aldehyde hydrazine

The transformation was significantly suppressed by radical scavengers such as TEMPO, 1,1-diphenylethylene and BHT (Figure S11). The Stern–Volmer luminescence-quenching experiment showed that the excited  $\text{Ru}(\text{bpy})_3\text{Cl}_2$  was quenched by  $\text{PhI}(\text{O}_2\text{CCHF}_2)_2$  (Figure S10). Based on the mechanistic studies, a possible mechanism is proposed in Figure S12. The single electron transfer (SET) between the excited photocatalyst  $^*\text{Ru}^{2+}$  and  $\text{PhI}(\text{O}_2\text{CCHF}_2)_2$  **6a** produces the difluoromethyl radical. Then, the addition of difluoromethyl radical to the double bond in **1a** forms the radical intermediate **E**, which undergoes 5-*endo*-trig cyclization to generate the *N*-centered radical intermediate **F**. Subsequently, radical **F** is oxidized by  $\text{Ru}^{3+}$  to form cation intermediate **G**, which is followed by deprotonation to afford the product **7aa**.

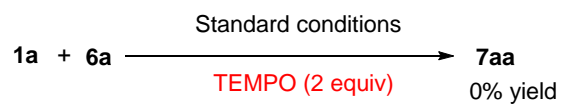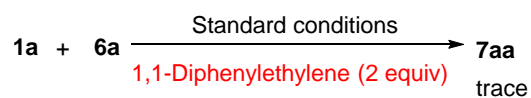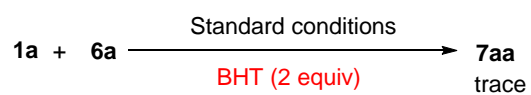

**Figure S11.** Mechanistic studies.

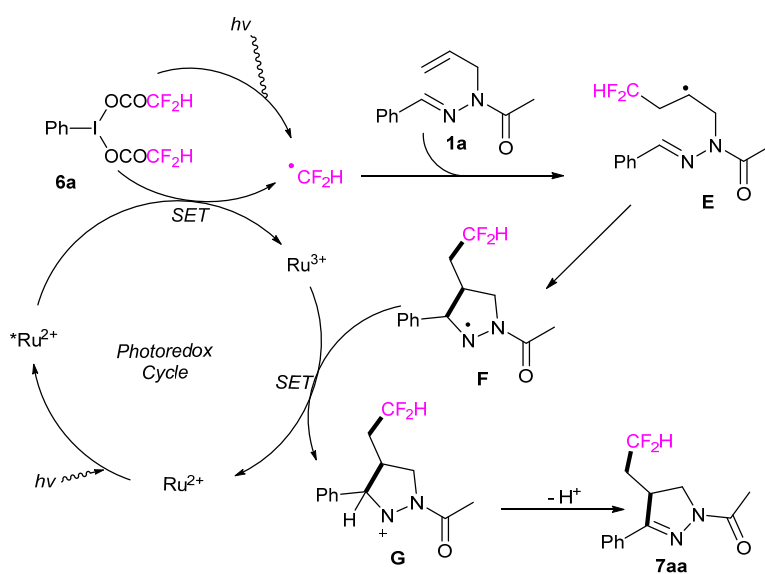

**Figure S12.** Proposed mechanism.

## 4. Characterization Data for the Products

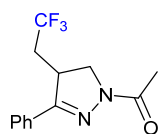

**1-(3-Phenyl-4-(2,2,2-trifluoroethyl)-4,5-dihydro-1H-pyrazol-1-yl)ethan-1-one (3aa, 44.9 mg, 83%),** colorless oil;  $^1\text{H NMR}$  (400 MHz,  $\text{CDCl}_3$ )  $\delta$  7.70-7.68 (m, 2H), 7.47-7.45 (m, 3H), 4.16-4.08 (m, 2H), 3.95-3.89 (m, 1H), 2.61-2.48 (m, 1H), 2.40 (s, 3H), 2.24-2.15 (m, 1H);  $^{13}\text{C NMR}$  (101 MHz,  $\text{CDCl}_3$ )  $\delta$  169.65, 155.51, 130.61, 126.02 (q,  $J_{\text{C-F}} = 278.5$  Hz), 129.51, 129.20, 126.67, 50.31, 38.49 (q,  $J_{\text{C-F}} = 2.7$  Hz), 36.17 (q,  $J_{\text{C-F}} = 28.6$  Hz), 21.47;  $^{19}\text{F NMR}$  (752 MHz,  $\text{CDCl}_3$ )  $\delta$  -65.32 (t,  $J = 10.5$  Hz, 3F). HRMS (ESI)  $m/z$  calcd for  $\text{C}_{13}\text{H}_{14}\text{F}_3\text{N}_2\text{O}$  [ $\text{M}+\text{H}^+$ ]: 271.1053, found 271.1055.

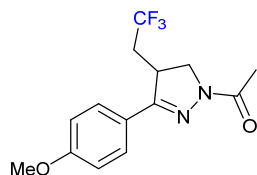

**1-(3-(4-Methoxyphenyl)-4-(2,2,2-trifluoroethyl)-4,5-dihydro-1H-pyrazol-1-yl)ethan-1-one (3ba, 44.4 mg, 74%),** colorless oil;  $^1\text{H NMR}$  (400 MHz,  $\text{CDCl}_3$ )  $\delta$  7.62 (d,  $J = 8.8$  Hz, 2H), 6.95 (d,  $J = 8.8$  Hz, 2H), 4.14-4.01 (m, 2H), 3.88-3.82 (m, 4H), 2.57-2.45 (m, 1H), 2.36 (s, 3H), 2.22-2.13 (m, 1H);  $^{13}\text{C NMR}$  (101 MHz,  $\text{CDCl}_3$ )  $\delta$  169.44, 161.46, 155.38, 128.28, 126.06 (q,  $J_{\text{C-F}} = 278.3$  Hz), 121.94, 114.60, 55.44, 50.18, 38.53 (q,  $J_{\text{C-F}} = 2.8$  Hz), 36.23 (q,  $J_{\text{C-F}} = 28.3$  Hz), 21.44;  $^{19}\text{F NMR}$  (752 MHz,  $\text{CDCl}_3$ )  $\delta$  -65.36 (t,  $J = 10.5$  Hz, 3F). HRMS (ESI)  $m/z$  calcd for  $\text{C}_{14}\text{H}_{16}\text{F}_3\text{N}_2\text{O}_2$  [ $\text{M}+\text{H}^+$ ]: 301.1158, found 301.1162.

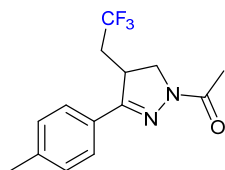

**1-(3-(P-tolyl)-4-(2,2,2-trifluoroethyl)-4,5-dihydro-1H-pyrazol-1-yl)ethan-1-one (3ca, 25.6 mg, 45%),** colorless oil;  $^1\text{H NMR}$  (400 MHz,  $\text{CDCl}_3$ )  $\delta$  7.57 (d,  $J = 8.1$  Hz, 2H), 7.25 (d,  $J = 7.9$  Hz, 2H), 4.15-4.05 (m, 2H), 3.92-3.85 (m, 1H), 2.59-2.49 (m, 1H), 2.40 (s, 3H), 2.38 (s, 3H), 2.22-2.13 (m, 1H);  $^{13}\text{C NMR}$  (101 MHz,  $\text{CDCl}_3$ )  $\delta$  169.58, 155.67, 141.06, 129.91, 126.05 (q,  $J_{\text{C-F}} = 278.4$  Hz), 126.64, 50.21, 38.51 (q,  $J_{\text{C-F}} = 2.0$  Hz), 36.21 (q,  $J_{\text{C-F}} = 28.7$  Hz), 21.53, 21.49;  $^{19}\text{F NMR}$  (752 MHz,  $\text{CDCl}_3$ )  $\delta$  -65.34 (t,  $J = 9.8$  Hz, 3F). HRMS (ESI)  $m/z$  calcd for  $\text{C}_{14}\text{H}_{16}\text{F}_3\text{N}_2\text{O}$  [ $\text{M}+\text{H}^+$ ]: 285.1209, found 285.1210.

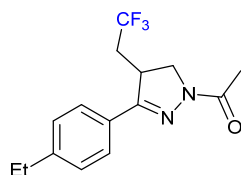

**1-(3-(4-Ethylphenyl)-4-(2,2,2-trifluoroethyl)-4,5-dihydro-1H-pyrazol-1-yl)ethan-1-one (3da, 35.8 mg, 60%),** colorless oil;  $^1\text{H}$  NMR (400 MHz,  $\text{CDCl}_3$ )  $\delta$  7.52 (d,  $J = 8.3$  Hz, 2H), 7.21 (d,  $J = 8.1$  Hz, 2H), 4.07-3.97 (m, 2H), 3.85-3.78 (m, 1H), 2.65-2.59 (m, 2H), 2.53-2.41 (m, 1H), 2.31 (s, 3H), 2.15-2.06 (m, 1H), 1.18 (t,  $J = 7.6$  Hz, 3H);  $^{13}\text{C}$  NMR (101 MHz,  $\text{CDCl}_3$ )  $\delta$  169.53, 155.66, 147.30, 126.06 (q,  $J_{\text{C-F}} = 278.3$  Hz), 128.72, 126.88, 126.73, 50.21, 38.49 (q,  $J_{\text{C-F}} = 2.4$  Hz), 36.21 (q,  $J_{\text{C-F}} = 28.7$  Hz), 28.82, 21.46, 15.34;  $^{19}\text{F}$  NMR (752 MHz,  $\text{CDCl}_3$ )  $\delta$  -65.35 (t,  $J = 11.3$  Hz, 3F). HRMS (ESI)  $m/z$  calcd for  $\text{C}_{15}\text{H}_{18}\text{F}_3\text{N}_2\text{O}$  [ $\text{M}+\text{H}^+$ ]: 299.1366, found 299.1363.

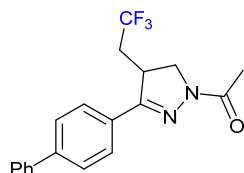

**1-(3-([1,1'-Biphenyl]-4-yl)-4-(2,2,2-trifluoroethyl)-4,5-dihydro-1H-pyrazol-1-yl)ethan-1-one (3ea, 42.9 mg, 62%),** colorless oil;  $^1\text{H}$  NMR (400 MHz,  $\text{CDCl}_3$ )  $\delta$  7.77 (d,  $J = 8.5$  Hz, 2H), 7.69 (d,  $J = 8.4$  Hz, 2H), 7.63 (d,  $J = 9.6$  Hz, 2H), 7.49 (t,  $J = 7.6$  Hz, 2H), 7.41 (t,  $J = 7.2$  Hz, 1H), 4.20-4.10 (m, 2H), 3.98-3.91 (m, 1H), 2.66-2.53 (m, 1H), 2.43 (s, 3H), 2.28-2.19 (m, 1H);  $^{13}\text{C}$  NMR (101 MHz,  $\text{CDCl}_3$ )  $\delta$  169.63, 155.23, 143.31, 139.87, 129.03, 128.35, 128.09, 127.81, 126.06 (q,  $J_{\text{C-F}} = 278.3$  Hz), 127.15, 127.07, 50.37, 38.48 (q,  $J_{\text{C-F}} = 2.9$  Hz), 36.24 (q,  $J_{\text{C-F}} = 28.6$  Hz), 21.54;  $^{19}\text{F}$  NMR (752 MHz,  $\text{CDCl}_3$ )  $\delta$  -65.26 (t,  $J = 10.5$  Hz, 3F). HRMS (ESI)  $m/z$  calcd for  $\text{C}_{19}\text{H}_{18}\text{F}_3\text{N}_2\text{O}$  [ $\text{M}+\text{H}^+$ ]: 347.1366, found 347.1371.

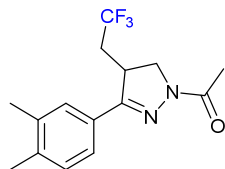

**1-(3-(3,4-Dimethylphenyl)-4-(2,2,2-trifluoroethyl)-4,5-dihydro-1H-pyrazol-1-yl)ethan-1-one (3fa, 38.2 mg, 64%),** colorless oil;  $^1\text{H}$  NMR (400 MHz,  $\text{CDCl}_3$ )  $\delta$  7.48 (s, 1H), 7.37 (dd,  $J = 7.8, 1.9$  Hz, 1H), 7.21 (d,  $J = 7.8$  Hz, 1H), 4.14-4.04 (m, 2H), 3.91-3.84 (m, 1H), 2.60-2.47 (m, 1H), 2.39 (s, 3H), 2.314 (s, 3H), 2.306 (s, 3H), 2.21-2.12 (m, 1H);  $^{13}\text{C}$  NMR (101 MHz,  $\text{CDCl}_3$ )  $\delta$  169.52, 155.86, 139.83, 137.66, 130.37, 126.08 (q,  $J_{\text{C-F}} = 278.3$  Hz), 127.70, 126.99, 124.24, 50.14, 38.51 (q,  $J_{\text{C-F}} = 2.7$  Hz), 36.25 (q,  $J_{\text{C-F}} = 28.3$  Hz), 21.50, 19.92, 19.88;  $^{19}\text{F}$  NMR (752 MHz,  $\text{CDCl}_3$ )  $\delta$  -65.35 (t,  $J = 10.5$  Hz, 3F). HRMS (ESI)  $m/z$  calcd for  $\text{C}_{15}\text{H}_{18}\text{F}_3\text{N}_2\text{O}$  [ $\text{M}+\text{H}^+$ ]: 299.1366, found 299.1365.

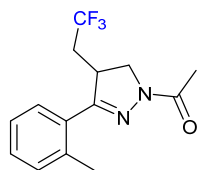

**1-(3-(O-tolyl)-4-(2,2,2-trifluoroethyl)-4,5-dihydro-1H-pyrazol-1-yl)ethan-1-one (3ga, 40.9 mg, 72%),** colorless oil;  $^1\text{H}$  NMR (400 MHz,  $\text{CDCl}_3$ )  $\delta$  7.26-7.20 (m, 4H), 4.11-4.05 (m, 1H), 3.95-3.86 (m, 2H), 2.45 (s, 3H), 2.36-2.28 (m, 4H), 2.14-2.02 (m,

1H);  $^{13}\text{C}$  NMR (101 MHz,  $\text{CDCl}_3$ )  $\delta$  169.55, 156.16, 138.21, 132.15, 126.02 (q,  $J_{\text{C-F}} = 278.3$  Hz), 129.81, 128.45, 128.22, 126.35, 49.27, 40.61 (q,  $J_{\text{C-F}} = 2.7$  Hz), 36.06 (q,  $J_{\text{C-F}} = 28.7$  Hz), 22.22, 21.46;  $^{19}\text{F}$  NMR (752 MHz,  $\text{CDCl}_3$ )  $\delta$  -65.32 (t,  $J = 10.5$  Hz, 3F). HRMS (ESI)  $m/z$  calcd for  $\text{C}_{14}\text{H}_{16}\text{F}_3\text{N}_2\text{O}$  [ $\text{M}+\text{H}^+$ ]: 285.1209, found 285.1204.

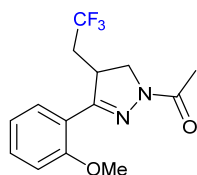

**1-(3-(2-Methoxyphenyl)-4-(2,2,2-trifluoroethyl)-4,5-dihydro-1H-pyrazol-1-yl)ethan-1-one (3ha)**, 44.4 mg, 74%), colorless oil;  $^1\text{H}$  NMR (400 MHz,  $\text{CDCl}_3$ )  $\delta$  7.74-7.75 (m, 1H), 7.45-7.41 (m, 1H), 7.04-6.96 (m, 2H), 4.26-4.19 (m, 2H), 3.94-3.87 (m, 4H), 2.42-2.36 (m, 4H), 2.10-1.99 (m, 1H);  $^{13}\text{C}$  NMR (101 MHz,  $\text{CDCl}_3$ )  $\delta$  169.33, 157.31, 156.29, 132.05, 126.34 (q,  $J_{\text{C-F}} = 278.1$  Hz), 130.06, 121.28, 118.72, 111.38, 55.20, 50.05, 41.29 (q,  $J_{\text{C-F}} = 2.7$  Hz), 36.33 (q,  $J_{\text{C-F}} = 28.4$  Hz), 21.45;  $^{19}\text{F}$  NMR (752 MHz,  $\text{CDCl}_3$ )  $\delta$  -65.59 (t,  $J = 9.8$  Hz, 3F). HRMS (ESI)  $m/z$  calcd for  $\text{C}_{14}\text{H}_{16}\text{F}_3\text{N}_2\text{O}_2$  [ $\text{M}+\text{H}^+$ ]: 301.1158, found 301.1161.

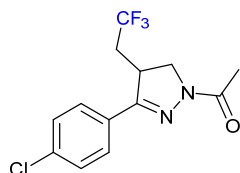

**1-(3-(4-Chlorophenyl)-4-(2,2,2-trifluoroethyl)-4,5-dihydro-1H-pyrazol-1-yl)ethan-1-one (3ia)**, 48.1 mg, 79%), colorless oil;  $^1\text{H}$  NMR (400 MHz,  $\text{CDCl}_3$ )  $\delta$  7.61 (d,  $J = 8.7$  Hz, 2H), 7.41 (d,  $J = 8.6$  Hz, 2H), 4.15-4.05 (m, 2H), 3.89-3.82 (m, 1H), 2.53-2.41 (m, 1H), 2.36 (s, 3H), 2.24-2.15 (m, 1H);  $^{13}\text{C}$  NMR (101 MHz,  $\text{CDCl}_3$ )  $\delta$  169.59, 154.33, 136.56, 129.47, 128.05, 127.88, 125.92 (q,  $J_{\text{C-F}} = 278.5$  Hz), 50.44, 38.37 (q,  $J_{\text{C-F}} = 2.6$  Hz), 36.05 (q,  $J_{\text{C-F}} = 28.6$  Hz), 21.42;  $^{19}\text{F}$  NMR (752 MHz,  $\text{CDCl}_3$ )  $\delta$  -65.29 (t,  $J = 11.3$  Hz, 3F). HRMS (ESI)  $m/z$  calcd for  $\text{C}_{13}\text{H}_{13}\text{ClF}_3\text{N}_2\text{O}$  [ $\text{M}+\text{H}^+$ ]: 305.0663, found 305.0661.

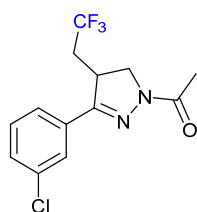

**1-(3-(3-Chlorophenyl)-4-(2,2,2-trifluoroethyl)-4,5-dihydro-1H-pyrazol-1-yl)ethan-1-one (3ja)**, 42.7 mg, 70%) colorless oil;  $^1\text{H}$  NMR (400 MHz,  $\text{CDCl}_3$ )  $\delta$  7.71 (s, 1H), 7.50-7.47 (m, 1H), 7.43-7.38 (m, 2H), 4.17-4.06 (m, 2H), 3.90-3.83 (m, 1H), 2.55-2.46 (m, 1H), 2.38 (s, 3H), 2.25-2.16 (m, 1H);  $^{13}\text{C}$  NMR (101 MHz,  $\text{CDCl}_3$ )  $\delta$  169.70, 154.06, 135.30, 131.39, 130.52, 130.45, 125.90 (q,  $J_{\text{C-F}} = 278.4$  Hz), 126.62, 124.66, 50.46, 38.38 (q,  $J_{\text{C-F}} = 2.7$  Hz), 36.03 (q,  $J_{\text{C-F}} = 28.4$  Hz), 21.46;  $^{19}\text{F}$  NMR (752 MHz,  $\text{CDCl}_3$ )  $\delta$  -65.23 (t,  $J = 10.5$  Hz, 3F). HRMS (ESI)  $m/z$  calcd for  $\text{C}_{13}\text{H}_{13}\text{ClF}_3\text{N}_2\text{O}$  [ $\text{M}+\text{H}^+$ ]: 305.0663, found 305.0664.

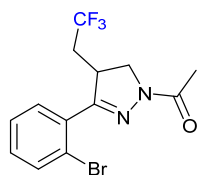

**1-(3-(2-Bromophenyl)-4-(2,2,2-trifluoroethyl)-4,5-dihydro-1H-pyrazol-1-yl)ethan-1-one (3ka, 50.3 mg, 72%)** colorless oil;  $^1\text{H}$  NMR (400 MHz,  $\text{CDCl}_3$ )  $\delta$  7.66 (d,  $J = 9.2$  Hz, 1H), 7.45-7.37 (m, 2H), 7.34-7.29 (m, 1H), 4.35-4.26 (m, 2H), 3.97-3.87 (m, 1H), 2.34-2.25 (m, 4H), 2.18-2.07 (m, 1H);  $^{13}\text{C}$  NMR (101 MHz,  $\text{CDCl}_3$ )  $\delta$  169.65, 156.32, 134.04, 131.53, 131.31, 131.18, 126.19 (q,  $J_{\text{C-F}} = 278.3$  Hz), 127.89, 121.79, 49.86, 41.03 (q,  $J_{\text{C-F}} = 2.5$  Hz), 35.60 (q,  $J_{\text{C-F}} = 28.8$  Hz), 21.48;  $^{19}\text{F}$  NMR (752 MHz,  $\text{CDCl}_3$ )  $\delta$  -65.12 (t,  $J = 10.5$  Hz, 3F). HRMS (ESI)  $m/z$  calcd for  $\text{C}_{13}\text{H}_{13}\text{BrF}_3\text{N}_2\text{O}$   $[\text{M}+\text{H}^+]$ : 349.0158, found 349.0164.

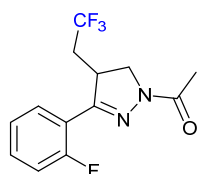

**1-(3-(2-Fluorophenyl)-4-(2,2,2-trifluoroethyl)-4,5-dihydro-1H-pyrazol-1-yl)ethan-1-one (3la, 52.4 mg, 91%)** colorless oil;  $^1\text{H}$  NMR (400 MHz,  $\text{CDCl}_3$ )  $\delta$  7.87-7.83 (m, 1H), 7.46-7.41 (m, 1H), 7.24-7.20 (m, 1H), 7.17-7.12 (m, 1H), 4.20-4.14 (m, 1H), 4.07-3.99 (m, 2H), 2.48-2.37 (m, 4H), 2.21-2.10 (m, 1H);  $^{13}\text{C}$  NMR (101 MHz,  $\text{CDCl}_3$ )  $\delta$  169.52, 160.39 (d,  $J_{\text{C-F}} = 252.4$  Hz), 152.69 (d,  $J_{\text{C-F}} = 2.6$  Hz), 132.38 (d,  $J_{\text{C-F}} = 8.8$  Hz), 129.56 (d,  $J_{\text{C-F}} = 3.2$  Hz), 125.97 (q,  $J_{\text{C-F}} = 278.2$  Hz), 124.99 (d,  $J_{\text{C-F}} = 3.3$  Hz), 117.83 (d,  $J_{\text{C-F}} = 11.41$  Hz), 116.70 (d,  $J_{\text{C-F}} = 22.3$  Hz), 50.04, 40.73 (q,  $J_{\text{C-F}} = 2.8$  Hz), 36.11 (q,  $J_{\text{C-F}} = 29.5$  Hz), 21.42;  $^{19}\text{F}$  NMR (752 MHz,  $\text{CDCl}_3$ )  $\delta$  -65.18 (t,  $J = 10.5$  Hz, 3F), -114.29 (s, 1F). HRMS (ESI)  $m/z$  calcd for  $\text{C}_{13}\text{H}_{13}\text{F}_4\text{N}_2\text{O}$   $[\text{M}+\text{H}^+]$ : 289.0959, found 289.0964.

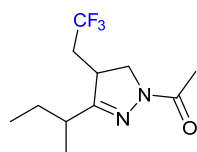

**1-(3-(Sec-butyl)-4-(2,2,2-trifluoroethyl)-4,5-dihydro-1H-pyrazol-1-yl)ethan-1-one (3ma, 39.5 mg, 79%)** colorless oil;  $^1\text{H}$  NMR (400 MHz,  $\text{CDCl}_3$ )  $\delta$  4.11-4.03 (m, 1H), 3.78-3.72 (m, 1H), 3.42-3.31 (m, 1H), 2.52-2.26 (m, 5H), 2.18-2.08 (m, 1H), 1.85-1.41 (m, 2H), 1.20 (d,  $J = 6.7$  Hz, 1.5H), 1.15 (d,  $J = 7.1$  Hz, 1.5H), 0.95 (t,  $J = 7.4$  Hz, 1.5H), 0.92 (t,  $J = 7.4$  Hz, 1.5H);  $^{13}\text{C}$  NMR (101 MHz,  $\text{CDCl}_3$ )  $\delta$  169.16, 162.54, 162.50, 125.96 (q,  $J_{\text{C-F}} = 278.7$  Hz), 49.45, 49.35, 40.47 (q,  $J_{\text{C-F}} = 2.1$  Hz), 40.14 (q,  $J_{\text{C-F}} = 2.3$  Hz), 35.50 (q,  $J_{\text{C-F}} = 28.7$  Hz), 34.63, 33.86, 27.19, 26.50, 21.33, 18.38, 16.23, 11.94, 10.89;  $^{19}\text{F}$  NMR (752 MHz,  $\text{CDCl}_3$ )  $\delta$  -65.23 (dt,  $J = 18.0$  Hz, 10.5 Hz, 3F). HRMS (ESI)  $m/z$  calcd for  $\text{C}_{11}\text{H}_{18}\text{F}_3\text{N}_2\text{O}$   $[\text{M}+\text{H}^+]$ : 251.1366, found 251.1363.

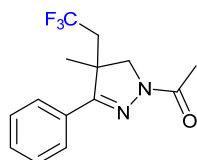

**1-(4-Methyl-3-phenyl-4-(2,2,2-trifluoroethyl)-4,5-dihydro-1H-pyrazol-1-yl)ethan-1-one (3na, 47.2 mg, 83%)** colorless oil;  $^1\text{H}$  NMR (400 MHz,  $\text{CDCl}_3$ )  $\delta$  7.71-7.68 (m, 2H), 7.44-7.41 (m, 3H), 4.16 (d,  $J = 12.4$  Hz, 1H), 3.91 (d,  $J = 12.4$  Hz, 1H), 2.76-2.64 (m, 1H), 2.54-2.45 (m, 1H), 2.37 (s, 3H), 1.62 (s, 3H);  $^{13}\text{C}$  NMR (101 MHz,  $\text{CDCl}_3$ )  $\delta$  169.63, 158.68, 130.15, 128.90, 127.29, 125.85 (q,  $J_{\text{C-F}} = 279.9$  Hz), 57.64 (q,  $J_{\text{C-F}} = 2.3$  Hz), 47.76 (q,  $J_{\text{C-F}} = 1.9$  Hz), 40.43 (q,  $J_{\text{C-F}} = 27.6$  Hz), 24.49, 21.27;  $^{19}\text{F}$  NMR (752 MHz,  $\text{CDCl}_3$ )  $\delta$  -60.55 (t,  $J = 11.3$  Hz, 3F). HRMS (ESI)  $m/z$  calcd for  $\text{C}_{14}\text{H}_{16}\text{F}_3\text{N}_2\text{O}$  [ $\text{M}+\text{H}^+$ ]: 285.1209, found 285.1211.

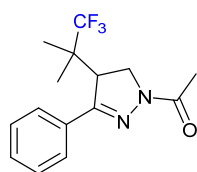

**1-(3-Phenyl-4-(1,1,1-trifluoro-2-methylpropan-2-yl)-4,5-dihydro-1H-pyrazol-1-yl)ethan-1-one (3oa, 40.0 mg, 67%)** colorless oil;  $^1\text{H}$  NMR (400 MHz,  $\text{CDCl}_3$ )  $\delta$  7.41-7.33 (m, 5H), 4.19-4.07 (m, 2H), 2.53-2.44 (m, 1H), 2.30 (s, 3H), 1.39 (s, 3H), 1.30 (d,  $J = 2.0$  Hz, 3H);  $^{13}\text{C}$  NMR (101 MHz,  $\text{CDCl}_3$ )  $\delta$  172.32, 154.63, 137.12, 128.68, 128.47, 128.09, 126.24 (q,  $J_{\text{C-F}} = 283.0$  Hz), 44.78 (q,  $J_{\text{C-F}} = 25.7$  Hz), 36.03 (q,  $J_{\text{C-F}} = 4.2$  Hz), 34.60, 28.44 (q,  $J_{\text{C-F}} = 1.8$  Hz), 23.25 (q,  $J_{\text{C-F}} = 2.2$  Hz), 21.21;  $^{19}\text{F}$  NMR (752 MHz,  $\text{CDCl}_3$ )  $\delta$  -63.84 (d,  $J = 9.8$  Hz, 3F). HRMS (ESI)  $m/z$  calcd for  $\text{C}_{15}\text{H}_{18}\text{F}_3\text{N}_2\text{O}$  [ $\text{M}+\text{H}^+$ ]: 299.1366, found 299.1369.

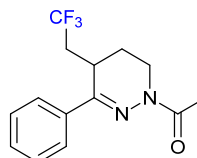

**1-(3-Phenyl-4-(2,2,2-trifluoroethyl)-5,6-dihydropyridazin-1(4H)-yl)ethan-1-one (5aa, 39.8 mg, 70%)**, colorless oil;  $^1\text{H}$  NMR (400 MHz,  $\text{CDCl}_3$ )  $\delta$  7.75-7.72 (m, 2H), 7.45-7.38 (m, 3H), 4.50-4.44 (m, 1H), 3.40-3.36 (m, 1H), 3.26-3.18 (m, 1H), 2.43 (s, 1H), 2.38-2.15 (m, 3H), 1.98-1.91 (m, 1H);  $^{13}\text{C}$  NMR (101 MHz,  $\text{CDCl}_3$ )  $\delta$  172.49, 146.17, 135.23, 126.09 (q,  $J_{\text{C-F}} = 279.0$  Hz), 129.63, 128.89, 125.65, 35.14 (q,  $J_{\text{C-F}} = 28.0$  Hz), 34.52, 25.10 (q,  $J_{\text{C-F}} = 2.3$  Hz), 21.35, 21.23;  $^{19}\text{F}$  NMR (752 MHz,  $\text{CDCl}_3$ )  $\delta$  -63.88 (t,  $J = 11.3$  Hz, 3F). HRMS (ESI)  $m/z$  calcd for  $\text{C}_{14}\text{H}_{16}\text{F}_3\text{N}_2\text{O}$  [ $\text{M}+\text{H}^+$ ]: 285.1209, found 285.1204.

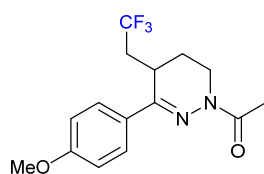

**1-(3-(4-Methoxyphenyl)-4-(2,2,2-trifluoroethyl)-5,6-dihydropyridazin-1(4H)-yl)ethan-1-one (5ba, 37.5 mg, 60%)**, colorless oil;  $^1\text{H}$  NMR (400 MHz,  $\text{CDCl}_3$ )  $\delta$  7.67 (d,

$J = 9.0$  Hz, 2H), 6.93 (d,  $J = 8.9$  Hz, 2H), 4.49-4.44 (m, 1H), 3.84 (s, 3H), 3.35-3.31 (m, 1H), 3.21-3.13 (m, 1H), 2.40 (s, 3H), 2.36-2.15 (m, 3H), 1.97-1.87 (m, 1H);  $^{13}\text{C}$  NMR (101 MHz,  $\text{CDCl}_3$ )  $\delta$  172.29, 160.76, 146.01, 126.4 (q,  $J_{\text{C-F}} = 279.0$  Hz), 127.74, 127.08, 114.20, 55.38, 35.17 (q,  $J_{\text{C-F}} = 27.7$  Hz), 34.37, 25.03 (q,  $J_{\text{C-F}} = 2.6$  Hz), 21.33, 21.26;  $^{19}\text{F}$  NMR (752 MHz,  $\text{CDCl}_3$ )  $\delta$  -63.94 (t,  $J = 10.5$  Hz, 3F). HRMS (ESI)  $m/z$  calcd for  $\text{C}_{15}\text{H}_{18}\text{F}_3\text{N}_2\text{O}_2$  [ $\text{M}+\text{H}^+$ ]: 315.1315, found 315.1319.

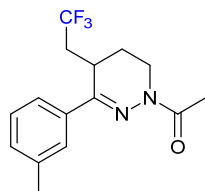

**1-(3-(M-tolyl)-4-(2,2,2-trifluoroethyl)-5,6-dihydropyridazin-1(4H)-yl)ethan-1-one (5ca**, 40.7 mg, 68%), colorless oil;  $^1\text{H}$  NMR (400 MHz,  $\text{CDCl}_3$ )  $\delta$  7.53-7.50 (m, 2H), 7.31 (t,  $J = 7.6$  Hz, 1H), 7.21 (d,  $J = 7.5$  Hz, 1H), 4.48-4.43 (m, 1H), 3.39-3.34 (m, 1H), 3.24-3.17 (m, 1H), 2.42 (s, 3H), 2.39 (s, 3H), 2.37-2.27 (m, 1H), 2.24-2.13 (m, 2H), 1.98-1.88 (m, 1H);  $^{13}\text{C}$  NMR (101 MHz,  $\text{CDCl}_3$ )  $\delta$  172.43, 146.44, 138.54, 135.26, 130.41, 128.76, 126.38 (q,  $J_{\text{C-F}} = 278.9$  Hz), 126.37, 122.85, 35.18 (q,  $J_{\text{C-F}} = 28.1$  Hz), 34.51, 25.10 (q,  $J_{\text{C-F}} = 2.4$  Hz), 21.62, 21.35, 21.28;  $^{19}\text{F}$  NMR (752 MHz,  $\text{CDCl}_3$ )  $\delta$  -63.92 (t,  $J = 11.3$  Hz, 3F). HRMS (ESI)  $m/z$  calcd for  $\text{C}_{15}\text{H}_{18}\text{F}_3\text{N}_2\text{O}$  [ $\text{M}+\text{H}^+$ ]: 299.1366, found 299.1372.

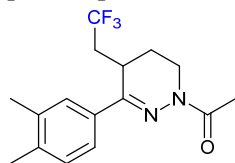

**1-(3-(3,4-Dimethylphenyl)-4-(2,2,2-trifluoroethyl)-5,6-dihydropyridazin-1(4H)-yl)ethan-1-one (5da**, 29.9 mg, 48%), colorless oil;  $^1\text{H}$  NMR (400 MHz,  $\text{CDCl}_3$ )  $\delta$  7.49 (s, 1H), 7.44 (d,  $J = 7.9$  Hz, 1H), 7.18 (d,  $J = 7.9$  Hz, 1H), 4.48-4.44 (m, 1H), 3.37-3.34 (m, 1H), 3.24-3.16 (m, 1H), 2.42 (s, 3H), 2.37-2.33 (m, 1H), 2.31 (s, 3H), 2.30 (s, 3H), 2.24-2.13 (m, 2H), 1.98-1.89 (m, 1H);  $^{13}\text{C}$  NMR (101 MHz,  $\text{CDCl}_3$ )  $\delta$  172.43, 146.62, 138.58, 137.14, 132.89, 130.12, 126.40 (q,  $J_{\text{C-F}} = 278.8$  Hz), 126.90, 123.18, 35.24 (q,  $J_{\text{C-F}} = 27.8$  Hz), 34.47, 25.16 (q,  $J_{\text{C-F}} = 2.3$  Hz), 21.38, 21.31, 20.09, 19.69;  $^{19}\text{F}$  NMR (752 MHz,  $\text{CDCl}_3$ )  $\delta$  -63.94 (t,  $J = 10.5$  Hz, 3F). HRMS (ESI)  $m/z$  calcd for  $\text{C}_{16}\text{H}_{20}\text{F}_3\text{N}_2\text{O}$  [ $\text{M}+\text{H}^+$ ]: 313.1522, found 313.1518.

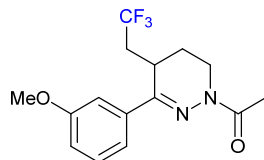

**1-(3-(3-Methoxyphenyl)-4-(2,2,2-trifluoroethyl)-5,6-dihydropyridazin-1(4H)-yl)ethan-1-one (5ea**, 30.2 mg, 48%), colorless oil;  $^1\text{H}$  NMR (400 MHz,  $\text{CDCl}_3$ )  $\delta$  7.37-7.28 (m, 3H), 6.97-6.94 (m, 1H), 4.50-4.45 (m, 1H), 3.85 (s, 1H), 3.38-3.33 (m, 1H), 3.25-3.17 (m, 1H), 2.43-2.30 (m, 4H), 2.27-2.15 (m, 2H), 1.99-1.90 (m, 1H);  $^{13}\text{C}$  NMR (101 MHz,  $\text{CDCl}_3$ )  $\delta$  172.46, 159.96, 145.96, 136.70, 129.89, 126.34 (q,  $J_{\text{C-F}} = 279.2$  Hz), 118.01, 115.16, 111.23, 55.27, 35.23 (q,  $J_{\text{C-F}} = 27.9$  Hz), 34.52, 25.24 (q,  $J_{\text{C-F}} = 2.6$  Hz), 21.34, 21.23;  $^{19}\text{F}$  NMR (752 MHz,  $\text{CDCl}_3$ )  $\delta$  -63.92 (t,  $J = 10.5$  Hz,



3F). HRMS (ESI)  $m/z$  calcd for  $C_{15}H_{18}F_3N_2O_2$   $[M+H^+]$ : 315.1315, found 315.1317.

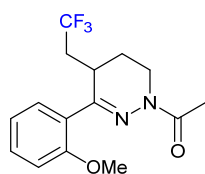

**1-(3-(2-Methoxyphenyl)-4-(2,2,2-trifluoroethyl)-5,6-dihydropyridazin-1(4H)-yl)ethan-1-one (5fa, 32.1 mg, 51%),** colorless oil;  $^1H$  NMR (400 MHz,  $CDCl_3$ )  $\delta$  7.41-7.34 (m, 2H), 7.03-6.99 (m, 1H), 6.95-6.92 (m, 1H), 4.00-3.93 (m, 1H), 3.85 (s, 3H), 3.80-3.73 (m, 1H), 3.47-3.40 (m, 1H), 2.32 (s, 3H), 2.30-2.20 (m, 2H), 1.97-1.81 (m, 2H);  $^{13}C$  NMR (101 MHz,  $CDCl_3$ )  $\delta$  172.40, 157.07, 149.50, 130.63, 130.44, 126.58 (q,  $J_{C-F} = 278.5$  Hz), 125.93, 121.06, 110.86, 55.29, 36.74, 35.89 (q,  $J_{C-F} = 28.2$  Hz), 29.43 (q,  $J_{C-F} = 2.8$  Hz), 22.88, 21.22;  $^{19}F$  NMR (752 MHz,  $CDCl_3$ )  $\delta$  -63.75 (t,  $J = 11.3$  Hz, 3F). HRMS (ESI)  $m/z$  calcd for  $C_{15}H_{18}F_3N_2O_2$   $[M+H^+]$ : 315.1315, found 315.1315.

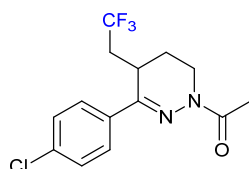

**1-(3-(4-Chlorophenyl)-4-(2,2,2-trifluoroethyl)-5,6-dihydropyridazin-1(4H)-yl)ethan-1-one (5ga, 42.7 mg, 67%),** colorless oil;  $^1H$  NMR (400 MHz,  $CDCl_3$ )  $\delta$  7.66 (d,  $J = 8.8$  Hz, 2H), 7.38 (d,  $J = 8.7$  Hz, 2H), 4.51-4.45 (m, 1H), 3.34-3.30 (m, 1H), 3.22-3.15 (m, 1H), 2.41 (s, 3H), 2.33-2.15 (m, 3H), 1.97-1.89 (m, 1H);  $^{13}C$  NMR (101 MHz,  $CDCl_3$ )  $\delta$  172.37, 145.96, 135.57, 133.73, 129.08, 126.25 (q,  $J_{C-F} = 278.9$  Hz), 126.89, 35.19 (q,  $J_{C-F} = 28.2$  Hz), 34.45, 25.03 (q,  $J_{C-F} = 2.5$  Hz), 21.31, 21.19;  $^{19}F$  NMR (752 MHz,  $CDCl_3$ )  $\delta$  -63.94 (t,  $J = 11.3$  Hz, 3F). HRMS (ESI)  $m/z$  calcd for  $C_{14}H_{15}ClF_3N_2O$   $[M+H^+]$ : 319.0820, found 319.0819.

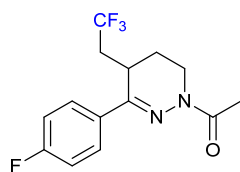

**1-(3-(4-Fluorophenyl)-4-(2,2,2-trifluoroethyl)-5,6-dihydropyridazin-1(4H)-yl)ethan-1-one (5ha, 37.5 mg, 62%),** colorless oil;  $^1H$  NMR (400 MHz,  $CDCl_3$ )  $\delta$  7.74-7.71 (m, 2H), 7.14-7.10 (m, 2H), 4.52-4.47 (m, 1H), 3.36-3.32 (m, 1H), 3.23-3.16 (m, 1H), 2.42 (s, 3H), 2.35-2.19 (m, 3H), 2.00-1.91 (m, 1H);  $^{13}C$  NMR (101 MHz,  $CDCl_3$ )  $\delta$  172.39, 163.56 (d,  $J_{C-F} = 251.1$  Hz), 145.15, 131.38 (d,  $J_{C-F} = 3.4$  Hz), 126.27 (q,  $J_{C-F} = 278.8$  Hz), 127.54 (d,  $J_{C-F} = 8.4$  Hz), 115.93 (d,  $J_{C-F} = 21.8$  Hz), 35.19 (q,  $J_{C-F} = 28.0$  Hz), 34.40, 25.14 (q,  $J_{C-F} = 2.4$  Hz), 21.36, 21.25;  $^{19}F$  NMR (752 MHz,  $CDCl_3$ )  $\delta$  -63.96 (t,  $J = 11.3$  Hz, 3F), -111.27 (s, 1F). HRMS (ESI)  $m/z$  calcd for  $C_{14}H_{15}F_4N_2O$   $[M+H^+]$ : 303.1115, found 303.1118.

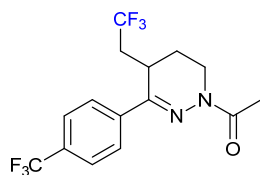

**1-(4-(2,2,2-Trifluoroethyl)-3-(4-(trifluoromethyl)phenyl)-5,6-dihydropyridazin-1(4H)-yl)ethan-1-one (5ia)**, 53.5 mg, 72%), colorless oil;  $^1\text{H}$  NMR (400 MHz,  $\text{CDCl}_3$ )  $\delta$  7.85 (d,  $J = 8.2$  Hz, 2H), 7.68 (d,  $J = 8.3$  Hz, 2H), 4.54-4.48 (m, 1H), 3.40-3.37 (m, 1H), 3.26-3.18 (m, 1H), 2.43 (s, 3H), 2.35-2.17 (m, 3H), 2.01-1.92 (m, 1H);  $^{13}\text{C}$  NMR (101 MHz,  $\text{CDCl}_3$ )  $\delta$  172.46, 144.49, 138.66, 131.16 (q,  $J_{\text{C-F}} = 32.7$  Hz), 126.20 (q,  $J_{\text{C-F}} = 278.8$  Hz), 125.88, 125.80 (q,  $J_{\text{C-F}} = 3.8$  Hz), 123.91 (q,  $J_{\text{C-F}} = 273.1$  Hz), 35.19 (q,  $J_{\text{C-F}} = 28.2$  Hz), 34.55, 25.08 (q,  $J_{\text{C-F}} = 2.5$  Hz), 21.31, 21.13;  $^{19}\text{F}$  NMR (752 MHz,  $\text{CDCl}_3$ )  $\delta$  -62.85 (s, 3F), -64.00 (t,  $J = 10.5$  Hz, 3F). HRMS (ESI)  $m/z$  calcd for  $\text{C}_{15}\text{H}_{15}\text{F}_6\text{N}_2\text{O}$  [ $\text{M}+\text{H}^+$ ]: 353.1083, found 353.1076.

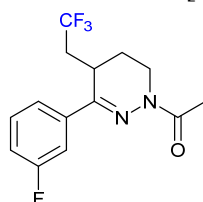

**1-(3-(3-Fluorophenyl)-4-(2,2,2-trifluoroethyl)-5,6-dihydropyridazin-1(4H)-yl)ethan-1-one (5ja)**, 36.3 mg, 60%), colorless oil;  $^1\text{H}$  NMR (400 MHz,  $\text{CDCl}_3$ )  $\delta$  7.49-7.36 (m, 3H), 7.12-7.07 (m, 1H), 4.52-4.46 (m, 1H), 3.35-3.30 (m, 1H), 3.24-3.16 (m, 1H), 2.42 (s, 3H), 2.36-2.16 (m, 3H), 1.98-1.88 (m, 1H);  $^{13}\text{C}$  NMR (101 MHz,  $\text{CDCl}_3$ )  $\delta$  172.43, 163.15 (d,  $J_{\text{C-F}} = 243.0$  Hz), 144.70 (d,  $J_{\text{C-F}} = 2.9$  Hz), 137.65 (d,  $J_{\text{C-F}} = 7.5$  Hz), 130.41 (d,  $J_{\text{C-F}} = 8.2$  Hz), 126.24 (q,  $J_{\text{C-F}} = 278.9$  Hz), 121.08 (d,  $J_{\text{C-F}} = 2.7$  Hz), 116.52 (d,  $J_{\text{C-F}} = 21.6$  Hz), 112.58 (d,  $J_{\text{C-F}} = 23.4$  Hz), 35.16 (q,  $J_{\text{C-F}} = 28.1$  Hz), 34.52, 25.16 (q,  $J_{\text{C-F}} = 2.6$  Hz), 21.32, 21.08;  $^{19}\text{F}$  NMR (752 MHz,  $\text{CDCl}_3$ )  $\delta$  -63.92 (t,  $J = 10.5$  Hz, 3F), -111.95 (dt,  $J = 14.3, 7.5$  Hz, 1F). HRMS (ESI)  $m/z$  calcd for  $\text{C}_{14}\text{H}_{14}\text{F}_4\text{N}_2\text{O}$  [ $\text{M}+\text{Na}^+$ ]: 325.0934, found 325.0945.

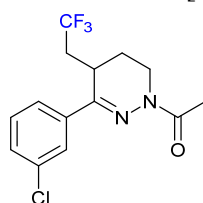

**1-(3-(3-Chlorophenyl)-4-(2,2,2-trifluoroethyl)-5,6-dihydropyridazin-1(4H)-yl)ethan-1-one (5ka)**, 54.2 mg, 85%), colorless oil;  $^1\text{H}$  NMR (400 MHz,  $\text{CDCl}_3$ )  $\delta$  7.74-7.72 (m, 1H), 7.58-7.55 (m, 1H), 7.38-7.35 (m, 2H), 4.51-4.45 (m, 1H), 3.34-3.30 (m, 1H), 3.24-3.16 (m, 1H), 2.42 (s, 3H), 2.32-2.17 (m, 3H), 1.97-1.87 (m, 1H);  $^{13}\text{C}$  NMR (101 MHz,  $\text{CDCl}_3$ )  $\delta$  172.44, 144.64, 137.15, 135.05, 130.09, 129.53, 126.22 (q,  $J_{\text{C-F}} = 278.9$  Hz), 125.87, 123.57, 35.17 (q,  $J_{\text{C-F}} = 28.1$  Hz), 34.54, 25.14 (q,  $J_{\text{C-F}} = 3.0$  Hz), 21.35, 21.15;  $^{19}\text{F}$  NMR (752 MHz,  $\text{CDCl}_3$ )  $\delta$  -63.91 (t,  $J = 10.5$  Hz, 3F). HRMS (ESI)  $m/z$  calcd for  $\text{C}_{14}\text{H}_{15}\text{ClF}_3\text{N}_2\text{O}$  [ $\text{M}+\text{H}^+$ ]: 319.0820, found 319.0822.

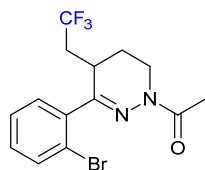

**1-(3-(2-Bromophenyl)-4-(2,2,2-trifluoroethyl)-5,6-dihydropyridazin-1(4H)-yl)ethan-1-one (5la)**, 39.2 mg, 54%), colorless oil;  $^1\text{H}$  NMR (400 MHz,  $\text{CDCl}_3$ )  $\delta$  7.57-7.55 (m, 1H), 7.33-7.29 (m, 1H), 7.23-7.17 (m, 2H), 3.94-3.85 (m, 1H), 3.74-3.67 (m, 1H), 3.20-3.14 (m, 1H), 2.21-2.08 (m, 5H), 2.04-1.92 (m, 2H);  $^{13}\text{C}$  NMR (101 MHz,  $\text{CDCl}_3$ )  $\delta$  172.52, 148.55, 137.98, 133.42, 130.45, 130.37, 127.69, 126.12 (q,  $J_{\text{C-F}} = 278.9$  Hz), 122.26, 36.07, 34.99 (q,  $J_{\text{C-F}} = 28.5$  Hz), 29.68 (q,  $J_{\text{C-F}} = 2.4$  Hz), 22.16, 21.21;  $^{19}\text{F}$  NMR (752 MHz,  $\text{CDCl}_3$ )  $\delta$  -63.64 (t,  $J = 10.5$  Hz, 3F). HRMS (ESI)  $m/z$  calcd for  $\text{C}_{14}\text{H}_{15}\text{BrF}_3\text{N}_2\text{O}$  [ $\text{M}+\text{H}^+$ ]: 363.0314, found 363.0309.

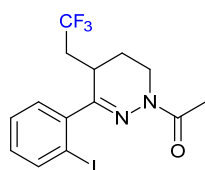

**1-(3-(2-Iodophenyl)-4-(2,2,2-trifluoroethyl)-5,6-dihydropyridazin-1(4H)-yl)ethan-1-one (5ma)**, 41.0 mg, 50%), colorless oil;  $^1\text{H}$  NMR (400 MHz,  $\text{CDCl}_3$ )  $\delta$  7.92-7.90 (m, 1H), 7.43-7.39 (m, 1H), 7.22-7.20 (m, 1H), 7.12-7.07 (m, 1H), 4.08-4.01 (m, 1H), 3.73-3.66 (m, 1H), 3.18-3.12 (m, 1H), 2.30 (s, 3H), 2.23-2.03 (m, 4H);  $^{13}\text{C}$  NMR (101 MHz,  $\text{CDCl}_3$ )  $\delta$  172.57, 149.96, 141.48, 140.00, 130.39, 129.31, 128.39, 126.11 (q,  $J_{\text{C-F}} = 278.8$  Hz), 97.28, 35.81, 34.71 (q,  $J_{\text{C-F}} = 28.6$  Hz), 29.79 (q,  $J_{\text{C-F}} = 2.2$  Hz), 22.25, 21.33;  $^{19}\text{F}$  NMR (752 MHz,  $\text{CDCl}_3$ )  $\delta$  -63.86 (t,  $J = 10.5$  Hz, 3F). HRMS (ESI)  $m/z$  calcd for  $\text{C}_{14}\text{H}_{15}\text{F}_3\text{IN}_2\text{O}$  [ $\text{M}+\text{H}^+$ ]: 411.0176, found 411.0167.

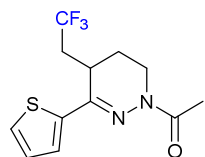

**1-(3-(Thiophen-2-yl)-4-(2,2,2-trifluoroethyl)-5,6-dihydropyridazin-1(4H)-yl)ethan-1-one (5na)**, 33.6 mg, 58%), colorless oil;  $^1\text{H}$  NMR (400 MHz,  $\text{CDCl}_3$ )  $\delta$  7.32 (d,  $J = 5.0$  Hz, 1H), 7.25 (d,  $J = 5.8$  Hz, 1H), 7.06-7.04 (m, 1H), 4.54-4.51 (m, 1H), 3.27-3.25 (m, 1H), 3.18-3.10 (m, 1H), 2.57-2.44 (m, 1H), 2.38 (s, 3H), 2.34-2.17 (m, 2H), 1.96-1.89 (m, 1H);  $^{13}\text{C}$  NMR (101 MHz,  $\text{CDCl}_3$ )  $\delta$  172.12, 142.64, 141.41, 126.3 (q,  $J_{\text{C-F}} = 278.9$  Hz), 127.66, 127.58, 125.04, 117.47, 35.66 (q,  $J_{\text{C-F}} = 28.3$  Hz), 34.34, 26.29 (q,  $J_{\text{C-F}} = 1.8$  Hz), 21.07, 20.97;  $^{19}\text{F}$  NMR (752 MHz,  $\text{CDCl}_3$ )  $\delta$  -63.85 (t,  $J = 10.5$  Hz, 3F). HRMS (ESI)  $m/z$  calcd for  $\text{C}_{12}\text{H}_{14}\text{F}_3\text{N}_2\text{OS}$  [ $\text{M}+\text{H}^+$ ]: 291.0733, found 291.0734.

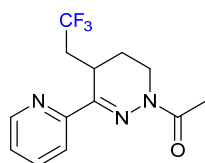

**1-(3-(Pyridin-2-yl)-4-(2,2,2-trifluoroethyl)-5,6-dihydropyridazin-1(4H)-yl)ethan-1**

**-one (50a, 49.6 mg, 87%), colorless oil;**  $^1\text{H NMR}$  (400 MHz,  $\text{CDCl}_3$ )  $\delta$  8.50 (d,  $J = 4.4$  Hz, 1H), 7.91 (d,  $J = 8.1$  Hz, 1H), 7.64 (t,  $J = 7.7$  Hz, 1H), 7.19 (t,  $J = 6.0$  Hz, 1H), 4.44-4.39 (m, 1H), 3.86-3.82 (m, 1H), 3.18-3.10 (m, 1H), 2.64-2.51 (m, 1H), 2.37 (s, 3H), 2.20-2.16 (m, 1H), 2.11-2.02 (m, 1H), 1.81-1.72 (m, 1H);  $^{13}\text{C NMR}$  (101 MHz,  $\text{CDCl}_3$ )  $\delta$  172.35, 153.50, 148.80, 147.37, 136.34, 126.48 (q,  $J_{\text{C-F}} = 279.2$  Hz), 123.75, 120.07, 35.10, 34.62 (q,  $J_{\text{C-F}} = 28.0$  Hz), 24.28 (q,  $J_{\text{C-F}} = 2.8$  Hz), 21.30, 20.21;  $^{19}\text{F NMR}$  (752 MHz,  $\text{CDCl}_3$ )  $\delta$  -63.09 (t,  $J = 11.3$  Hz, 3F). HRMS (ESI)  $m/z$  calcd for  $\text{C}_{13}\text{H}_{15}\text{F}_3\text{N}_3\text{O}$  [ $\text{M}+\text{H}^+$ ]: 286.1162, found 286.1160.

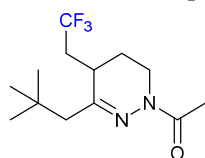

**1-(3-Neopentyl-4-(2,2,2-trifluoroethyl)-5,6-dihydropyridazin-1(4H)-yl)ethan-1-one (5pa, 22.8 mg, 41%), colorless oil;**  $^1\text{H NMR}$  (400 MHz,  $\text{CDCl}_3$ )  $\delta$  4.30-4.25 (m, 1H), 3.17-3.10 (m, 1H), 2.54-2.51 (m, 1H), 2.35-2.23 (m, 4H), 2.15-1.96 (m, 4H), 1.86-1.75 (m, 1H), 1.00 (s, 9H);  $^{13}\text{C NMR}$  (101 MHz,  $\text{CDCl}_3$ )  $\delta$  172.10, 149.39, 126.25 (q,  $J_{\text{C-F}} = 278.7$  Hz), 47.90, 34.92 (q,  $J_{\text{C-F}} = 28.4$  Hz), 34.10, 32.24, 29.97 (q,  $J_{\text{C-F}} = 2.6$  Hz), 29.80, 21.30;  $^{19}\text{F NMR}$  (752 MHz,  $\text{CDCl}_3$ )  $\delta$  -64.20 (t,  $J = 10.5$  Hz, 3F). HRMS (ESI)  $m/z$  calcd for  $\text{C}_{13}\text{H}_{22}\text{F}_3\text{N}_2\text{O}$  [ $\text{M}+\text{H}^+$ ]: 279.1679, found 279.1682.

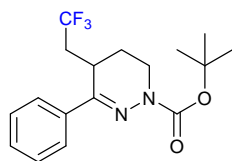

**2,2-Dimethyl-1-(3-phenyl-4-(2,2,2-trifluoroethyl)-5,6-dihydropyridazin-1(4H)-yl)propan-1-one (5qa, 47.0 mg, 72%), colorless oil;**  $^1\text{H NMR}$  (400 MHz,  $\text{CDCl}_3$ )  $\delta$  7.76 (d,  $J = 6.9$  Hz, 2H), 7.42-7.36 (m, 3H), 4.19 (d,  $J = 13.5$  Hz, 1H), 3.39-3.33 (m, 2H), 2.43-2.31 (m, 1H), 2.23-2.14 (m, 2H), 2.06-1.97 (m, 1H), 1.58 (s, 9H);  $^{13}\text{C NMR}$  (101 MHz,  $\text{CDCl}_3$ )  $\delta$  153.13, 135.57, 129.21, 128.72, 126.43 (q,  $J_{\text{C-F}} = 279.0$  Hz), 125.64, 81.80, 35.36 (q,  $J_{\text{C-F}} = 27.8$  Hz), 28.31, 24.82 (q,  $J_{\text{C-F}} = 2.0$  Hz), 21.77;  $^{19}\text{F NMR}$  (752 MHz,  $\text{CDCl}_3$ )  $\delta$  -64.16 (t,  $J = 10.5$  Hz, 3F). HRMS (ESI)  $m/z$  calcd for  $\text{C}_{17}\text{H}_{22}\text{F}_3\text{N}_2\text{O}_2$  [ $\text{M}+\text{H}^+$ ]: 343.1628, found 343.1634.

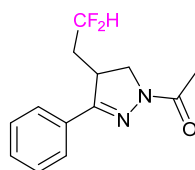

**1-(4-(2,2-Difluoroethyl)-3-phenyl-4,5-dihydro-1H-pyrazol-1-yl)ethan-1-one (7aa, 34.3 mg, 68%) colorless oil;**  $^1\text{H NMR}$  (400 MHz,  $\text{CDCl}_3$ )  $\delta$  7.72-7.69 (m, 2H), 7.45-7.42 (m, 3H), 6.09-5.79 (m, 1H), 4.12-4.03 (m, 2H), 3.92-3.86 (m, 1H), 2.39 (s, 3H), 2.32-2.21 (m, 1H), 2.03-1.93 (m, 1H);  $^{13}\text{C NMR}$  (101 MHz,  $\text{CDCl}_3$ )  $\delta$  169.68, 156.88, 130.47, 129.89, 129.07, 126.78, 115.47 (t,  $J_{\text{C-F}} = 241.1$  Hz), 50.52, 37.98 (t,  $J_{\text{C-F}} = 4.8$  Hz), 36.51 (t,  $J_{\text{C-F}} = 21.0$  Hz), 21.48;  $^{19}\text{F NMR}$  (752 MHz,  $\text{CDCl}_3$ )  $\delta$  -116.66 (ddd,  $J = 284.7, 55.5, 19.3, 14.5$  Hz, 1F), -117.27 (ddd,  $J = 284.6, 55.8, 20.4, 16.7$  Hz, 1F). HRMS (ESI)  $m/z$  calcd for  $\text{C}_{13}\text{H}_{15}\text{F}_2\text{N}_2\text{O}$  [ $\text{M}+\text{H}^+$ ]: 253.1147, found

253.1149.

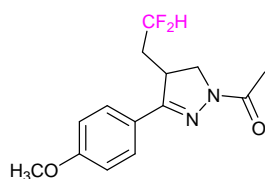

**1-(4-(2,2-Difluoroethyl)-3-(4-methoxyphenyl)-4,5-dihydro-1H-pyrazol-1-yl)ethan-1-one (7ba, 44.1 mg, 78%)** colorless oil;  $^1\text{H}$  NMR (400 MHz,  $\text{CDCl}_3$ )  $\delta$  7.65 (d,  $J = 8.7$  Hz, 2H), 6.95 (d,  $J = 8.7$  Hz, 2H), 6.07-5.79 (m, 1H), 4.05 (d,  $J = 7.4$  Hz, 2H), 3.88-3.78 (m, 4H), 2.37 (s, 3H), 2.32-2.19 (m, 1H), 2.04-1.89 (m, 1H);  $^{13}\text{C}$  NMR (101 MHz,  $\text{CDCl}_3$ )  $\delta$  169.49, 161.36, 156.73, 128.39, 122.37, 115.51 (t,  $J_{\text{C-F}} = 240.9$  Hz), 114.48, 55.45, 50.40, 38.05 (t,  $J_{\text{C-F}} = 4.9$  Hz), 36.63 (t,  $J_{\text{C-F}} = 21.1$  Hz), 21.46;  $^{19}\text{F}$  NMR (752 MHz,  $\text{CDCl}_3$ )  $\delta$  -116.57 (dddd,  $J = 284.5, 55.6, 19.2, 13.9$  Hz, 1F), -117.32 (dddd,  $J = 284.5, 55.8, 20.4, 16.8$  Hz, 1F). HRMS (ESI)  $m/z$  calcd for  $\text{C}_{14}\text{H}_{17}\text{F}_2\text{N}_2\text{O}_2$  [ $\text{M}+\text{H}^+$ ]: 283.1253, found 283.1249.

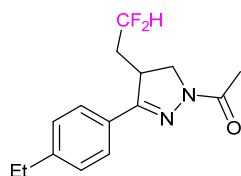

**1-(4-(2,2-Difluoroethyl)-3-(4-ethylphenyl)-4,5-dihydro-1H-pyrazol-1-yl)ethan-1-one (7da, 22.4 mg, 40%)** colorless oil;  $^1\text{H}$  NMR (400 MHz,  $\text{CDCl}_3$ )  $\delta$  7.60 (d,  $J = 8.1$  Hz, 2H), 7.25 (d,  $J = 7.0$  Hz, 2H), 6.06-5.78 (m, 1H), 4.09-4.02 (m, 2H), 3.87-3.82 (m, 1H), 2.67 (q,  $J = 7.6$  Hz, 2H), 2.37 (s, 3H), 2.29-2.20 (m, 1H), 2.02-1.91 (m, 1H), 1.24 (t,  $J = 7.6$  Hz, 3H);  $^{13}\text{C}$  NMR (101 MHz,  $\text{CDCl}_3$ )  $\delta$  169.78, 157.32, 147.22, 128.60, 127.21, 126.87, 115.51 (t,  $J_{\text{C-F}} = 241.2$  Hz), 50.44, 38.08 (t,  $J_{\text{C-F}} = 4.9$  Hz), 36.59 (t,  $J_{\text{C-F}} = 21.1$  Hz), 28.83, 21.40, 15.35;  $^{19}\text{F}$  NMR (752 MHz,  $\text{CDCl}_3$ )  $\delta$  -116.64 (ddt,  $J = 284.5, 55.6, 17.8$  Hz, 1F), -117.25 (ddt,  $J = 284.5, 55.8, 18.6$  Hz, 1F). HRMS (ESI)  $m/z$  calcd for  $\text{C}_{15}\text{H}_{19}\text{F}_2\text{N}_2\text{O}$  [ $\text{M}+\text{H}^+$ ]: 281.1460, found 281.1461.

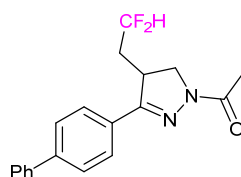

**1-(3-([1,1'-Biphenyl]-4-yl)-4-(2,2-difluoroethyl)-4,5-dihydro-1H-pyrazol-1-yl)ethan-1-one (7ea, 40.7 mg, 62%)** colorless oil;  $^1\text{H}$  NMR (400 MHz,  $\text{CDCl}_3$ )  $\delta$  7.79 (d,  $J = 8.7$  Hz, 2H), 7.69 (d,  $J = 1.6$  Hz, 2H), 7.62 (d,  $J = 1.6$  Hz, 2H), 7.48 (t,  $J = 7.6$  Hz, 2H), 7.40 (t,  $J = 7.7$  Hz, 1H), 6.12-5.82 (m, 1H), 4.15-4.09 (m, 2H), 3.95-3.88 (m, 1H), 2.43-2.26 (m, 4H), 2.10-1.94 (m, 1H);  $^{13}\text{C}$  NMR (101 MHz,  $\text{CDCl}_3$ )  $\delta$  169.64, 156.56, 143.16, 139.96, 128.99, 128.78, 128.02, 127.68, 127.25, 127.06, 115.50 (t,  $J_{\text{C-F}} = 241.2$  Hz), 50.59, 38.00 (t,  $J_{\text{C-F}} = 4.8$  Hz), 36.60 (t,  $J_{\text{C-F}} = 21.2$  Hz), 21.50;  $^{19}\text{F}$  NMR (752 MHz,  $\text{CDCl}_3$ )  $\delta$  -116.58 (dddd,  $J = 284.5, 55.6, 19.3, 14.2$  Hz, 1F), -117.22 (dddd,  $J = 284.5, 55.8, 20.4, 16.6$  Hz, 1F). HRMS (ESI)  $m/z$  calcd for  $\text{C}_{19}\text{H}_{19}\text{F}_2\text{N}_2\text{O}$  [ $\text{M}+\text{H}^+$ ]: 329.1460, found 329.1465.

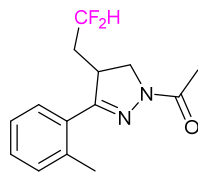

**1-(4-(2,2-Difluoroethyl)-3-(o-tolyl)-4,5-dihydro-1H-pyrazol-1-yl)ethan-1-one (7ga,** 36.8 mg, 69%) colorless oil;  $^1\text{H}$  NMR (400 MHz,  $\text{CDCl}_3$ )  $\delta$  7.28-7.20 (m, 4H), 5.95-5.65 (m, 1H), 4.11-4.05 (m, 1H), 3.90-3.85 (m, 2H), 2.46 (s, 3H), 2.29 (s, 3H), 2.16-2.05 (m, 1H), 1.94-1.80 (m, 1H);  $^{13}\text{C}$  NMR (101 MHz,  $\text{CDCl}_3$ )  $\delta$  169.61, 157.62, 138.11, 132.02, 129.69, 128.90, 128.45, 126.24, 115.46 (t,  $J_{\text{C-F}} = 241.1$  Hz), 49.51, 40.22 (t,  $J_{\text{C-F}} = 4.6$  Hz), 36.40 (t,  $J_{\text{C-F}} = 20.9$  Hz), 22.24, 21.50;  $^{19}\text{F}$  NMR (752 MHz,  $\text{CDCl}_3$ )  $\delta$  -116.82 (dt,  $J = 17.7, 9.5$  Hz, 1F), -116.88 (dt,  $J = 17.7, 9.5$  Hz, 1F). HRMS (ESI)  $m/z$  calcd for  $\text{C}_{14}\text{H}_{16}\text{F}_2\text{N}_2\text{O}$  [ $\text{M}+\text{H}^+$ ]: 267.1303, found 267.1301.

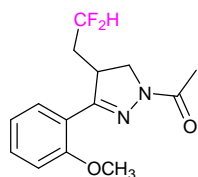

**1-(4-(2,2-Difluoroethyl)-3-(2-methoxyphenyl)-4,5-dihydro-1H-pyrazol-1-yl)ethan-1-one (7ha,** 16.9 mg, 30%) colorless oil;  $^1\text{H}$  NMR (400 MHz,  $\text{CDCl}_3$ )  $\delta$  7.73 (d,  $J = 7.6$  Hz, 1H), 7.42 (t,  $J = 7.8$  Hz, 1H), 7.02 (t,  $J = 7.4$  Hz, 1H), 6.96 (d,  $J = 8.4$  Hz, 1H), 5.99-5.71 (m, 1H), 4.24-4.12 (m, 2H), 3.87-3.79 (m, 4H), 2.37 (s, 3H), 2.20-2.07 (m, 1H), 1.91-1.77 (m, 1H);  $^{13}\text{C}$  NMR (101 MHz,  $\text{CDCl}_3$ )  $\delta$  169.54, 157.93, 157.48, 131.92, 130.08, 121.21, 119.17, 115.89 (t,  $J_{\text{C-F}} = 241.1$  Hz), 111.39, 55.32, 50.20, 40.92 (t,  $J_{\text{C-F}} = 4.8$  Hz), 36.67 (t,  $J_{\text{C-F}} = 20.9$  Hz), 21.40;  $^{19}\text{F}$  NMR (752 MHz,  $\text{CDCl}_3$ )  $\delta$  -116.41 (ddt,  $J = 284.3, 56.4, 18.0$  Hz, 1F), -116.88 (ddt,  $J = 283.5, 55.6, 17.3$  Hz, 1F). HRMS (ESI)  $m/z$  calcd for  $\text{C}_{14}\text{H}_{17}\text{F}_2\text{N}_2\text{O}_2$  [ $\text{M}+\text{H}^+$ ]: 283.1253, found 283.1256.

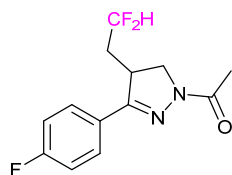

**1-(4-(2,2-difluoroethyl)-3-(4-fluorophenyl)-4,5-dihydro-1H-pyrazol-1-yl)ethan-1-one (7ia,** 41.6 mg, 77%) colorless oil;  $^1\text{H}$  NMR (400 MHz,  $\text{CDCl}_3$ )  $\delta$  7.72-7.69 (m, 2H), 7.16-7.12 (m, 2H), 6.10-5.80 (m, 1H), 4.13-4.07 (m, 2H), 3.89-3.83 (m, 1H), 2.38-2.21 (m, 4H), 2.04-1.94 (m, 1H);  $^{13}\text{C}$  NMR (101 MHz,  $\text{CDCl}_3$ )  $\delta$  169.64, 163.92 (d,  $J_{\text{C-F}} = 252.7$  Hz), 155.88, 128.80 (d,  $J_{\text{C-F}} = 8.5$  Hz), 126.14 (d,  $J_{\text{C-F}} = 3.5$  Hz), 116.3 (d,  $J_{\text{C-F}} = 22.1$  Hz), 115.37 (d,  $J_{\text{C-F}} = 241.2$  Hz), 50.62, 37.99 (t,  $J_{\text{C-F}} = 4.8$  Hz), 36.43 (t,  $J_{\text{C-F}} = 21.0$  Hz), 21.44;  $^{19}\text{F}$  NMR (752 MHz,  $\text{CDCl}_3$ )  $\delta$  -109.08 (ddd,  $J = 13.5, 8.1, 5.2$  Hz, 1F), -116.67 (dddd,  $J = 284.8, 55.6, 19.9, 13.7$  Hz, 1F), -117.41 (dddd,  $J = 285.0, 55.8, 21.3, 16.3$  Hz, 1F). HRMS (ESI)  $m/z$  calcd for  $\text{C}_{13}\text{H}_{14}\text{F}_3\text{N}_2\text{O}$  [ $\text{M}+\text{H}^+$ ]: 271.1053, found 271.1052.

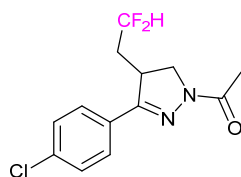

**1-(3-(4-Chlorophenyl)-4-(2,2-difluoroethyl)-4,5-dihydro-1H-pyrazol-1-yl)ethan-1-one (7ja**, 37.8 mg, 66%) colorless oil;  $^1\text{H}$  NMR (400 MHz,  $\text{CDCl}_3$ )  $\delta$  7.64 (d,  $J = 8.2$  Hz, 2H), 7.41 (d,  $J = 8.1$  Hz, 2H), 6.08-5.80 (m, 1H), 4.12-4.07 (m, 2H), 3.88-3.82 (m, 1H), 2.38 (s, 3H), 2.29-2.17 (m, 1H), 2.01-1.90 (m, 1H);  $^{13}\text{C}$  NMR (101 MHz,  $\text{CDCl}_3$ )  $\delta$  169.66, 155.73, 136.42, 129.35, 128.41, 128.01, 115.34 (t,  $J_{\text{C-F}} = 241.1$  Hz), 50.68, 37.84 (t,  $J_{\text{C-F}} = 4.6$  Hz), 36.40 (t,  $J_{\text{C-F}} = 21.0$  Hz), 21.46;  $^{19}\text{F}$  NMR (752 MHz,  $\text{CDCl}_3$ )  $\delta$  -116.67 (dddd,  $J = 284.8, 55.4, 19.7, 13.8$  Hz, 1F), -117.38 (dddd,  $J = 285.0, 55.7, 21.0, 16.0$  Hz, 1F). HRMS (ESI)  $m/z$  calcd for  $\text{C}_{13}\text{H}_{14}\text{ClF}_2\text{N}_2\text{O}$   $[\text{M}+\text{H}^+]$ : 287.0757, found 287.0760.

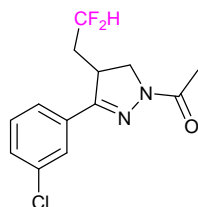

**1-(3-(3-Chlorophenyl)-4-(2,2-difluoroethyl)-4,5-dihydro-1H-pyrazol-1-yl)ethan-1-one (7ka**, 36.7 mg, 64%) colorless oil;  $^1\text{H}$  NMR (400 MHz,  $\text{CDCl}_3$ )  $\delta$  7.73 (s, 1H), 7.52 (d,  $J = 7.0$  Hz, 1H), 7.42-7.36 (m, 2H), 6.10-5.81 (m, 1H), 4.13-4.06 (m, 2H), 3.88-3.81 (m, 1H), 2.39-2.18 (m, 4H), 2.07-1.94 (m, 1H);  $^{13}\text{C}$  NMR (101 MHz,  $\text{CDCl}_3$ )  $\delta$  169.83, 155.54, 135.18, 131.75, 130.41, 130.33, 126.70, 124.83, 115.32 (t,  $J_{\text{C-F}} = 241.2$  Hz), 50.71, 37.88 (t,  $J_{\text{C-F}} = 4.7$  Hz), 36.36 (t,  $J_{\text{C-F}} = 21.1$  Hz), 21.45;  $^{19}\text{F}$  NMR (752 MHz,  $\text{CDCl}_3$ )  $\delta$  -116.69 (dddd,  $J = 284.9, 55.6, 19.8, 14.5$  Hz, 1F), -117.28 (dddd,  $J = 285.1, 55.7, 20.7, 16.3$  Hz, 1F). HRMS (ESI)  $m/z$  calcd for  $\text{C}_{13}\text{H}_{14}\text{ClF}_2\text{N}_2\text{O}$   $[\text{M}+\text{H}^+]$ : 287.0757, found 287.0759.

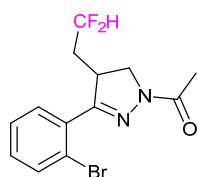

**1-(3-(2-Bromophenyl)-4-(2,2-difluoroethyl)-4,5-dihydro-1H-pyrazol-1-yl)ethan-1-one (7la**, 39.6 mg, 60%) colorless oil;  $^1\text{H}$  NMR (400 MHz,  $\text{CDCl}_3$ )  $\delta$  7.65 (d,  $J = 7.9$  Hz, 1H), 7.45-7.37 (m, 2H), 7.31 (t,  $J = 7.9$  Hz, 1H), 5.97-5.69 (m, 1H), 4.32-4.21 (m, 2H), 3.91-3.87 (m, 1H), 2.35 (s, 3H), 2.09-1.99 (m, 1H), 1.94-1.82 (m, 1H);  $^{13}\text{C}$  NMR (101 MHz,  $\text{CDCl}_3$ )  $\delta$  169.71, 157.63, 133.98, 131.63, 131.34, 131.26, 127.80, 121.88, 115.42 (t,  $J_{\text{C-F}} = 241.5$  Hz), 50.12, 40.78 (t,  $J_{\text{C-F}} = 4.5$  Hz), 35.94 (t,  $J_{\text{C-F}} = 21.2$  Hz), 21.49;  $^{19}\text{F}$  NMR (752 MHz,  $\text{CDCl}_3$ )  $\delta$  -115.84 (dddd,  $J = 284.7, 55.7, 18.4, 15.1$  Hz, 1F), -116.91 (ddt,  $J = 284.7, 55.8, 17.9$  Hz, 1F). HRMS (ESI)  $m/z$  calcd for  $\text{C}_{13}\text{H}_{14}\text{BrF}_2\text{N}_2\text{O}$   $[\text{M}+\text{H}^+]$ : 331.0252, found 331.0245.



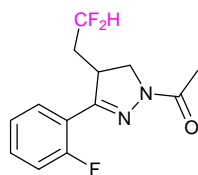

**1-(4-(2,2-Difluoroethyl)-3-(2-fluorophenyl)-4,5-dihydro-1H-pyrazol-1-yl)ethan-1-one (7ma, 38.4 mg, 71%)** colorless oil;  $^1\text{H}$  NMR (400 MHz,  $\text{CDCl}_3$ )  $\delta$  7.90-7.80 (m, 1H), 7.49-7.38 (m, 1H), 7.23 (t,  $J = 7.6$  Hz, 1H), 7.17-7.11 (m, 1H), 6.06-5.76 (m, 1H), 4.20-4.13 (m, 1H), 4.00-3.92 (m, 2H), 2.38-2.13 (m, 4H), 2.01-1.88 (m, 1H);  $^{13}\text{C}$  NMR (101 MHz,  $\text{CDCl}_3$ )  $\delta$  169.62, 160.50 (d,  $J_{\text{C-F}} = 252.7$  Hz), 154.06 (d,  $J_{\text{C-F}} = 2.7$  Hz), 132.22 (d,  $J_{\text{C-F}} = 8.8$  Hz), 129.60 (d,  $J_{\text{C-F}} = 3.3$  Hz), 124.91 (d,  $J_{\text{C-F}} = 3.3$  Hz), 118.20 (d,  $J_{\text{C-F}} = 11.4$  Hz), 115.69 (t,  $J_{\text{C-F}} = 241.5$  Hz), 116.65 (d,  $J_{\text{C-F}} = 22.1$  Hz), 50.30, 40.51 (q,  $J_{\text{C-F}} = 4.9$  Hz), 36.47 (t,  $J_{\text{C-F}} = 21.1$  Hz), 21.42;  $^{19}\text{F}$  NMR (752 MHz,  $\text{CDCl}_3$ )  $\delta$  -114.09 (s, 1F), -115.66 (ddt,  $J = 284.9, 55.7, 16.8$  Hz, 1F), -116.96 (ddt,  $J = 285.7, 55.8, 17.7$  Hz, 1F). HRMS (ESI)  $m/z$  calcd for  $\text{C}_{13}\text{H}_{14}\text{F}_3\text{N}_2\text{O}$  [ $\text{M}+\text{H}^+$ ]: 271.1053, found 271.1056.

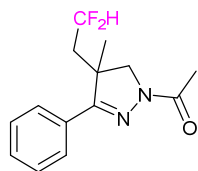

**1-(4-(2,2-Difluoroethyl)-4-methyl-3-phenyl-4,5-dihydro-1H-pyrazol-1-yl)ethan-1-one (7oa, 35.7 mg, 67%)** colorless oil;  $^1\text{H}$  NMR (400 MHz,  $\text{CDCl}_3$ )  $\delta$  7.74-7.71 (m, 2H), 7.44-7.41 (m, 3H), 5.99-5.69 (m, 1H), 4.14 (d,  $J = 12.2$  Hz, 1H), 3.85 (d,  $J = 12.2$  Hz, 1H), 2.41-2.24 (m, 5H), 1.59 (s, 3H);  $^{13}\text{C}$  NMR (101 MHz,  $\text{CDCl}_3$ )  $\delta$  169.65, 158.98, 130.42, 130.13, 128.90, 127.25, 115.50 (t,  $J_{\text{C-F}} = 241.4$  Hz), 57.67, 47.90 (t,  $J_{\text{C-F}} = 4.6$  Hz), 41.64 (t,  $J_{\text{C-F}} = 21.0$  Hz), 25.29, 21.27;  $^{19}\text{F}$  NMR (752 MHz,  $\text{CDCl}_3$ )  $\delta$  -112.28 (dddd,  $J = 290.7, 55.2, 18.3, 13.8$  Hz, 1F), -113.65 (dddd,  $J = 290.6, 55.6, 20.2, 13.8$  Hz, 1F). HRMS (ESI)  $m/z$  calcd for  $\text{C}_{14}\text{H}_{17}\text{F}_2\text{N}_2\text{O}$  [ $\text{M}+\text{H}^+$ ]: 267.1303, found 267.1301.

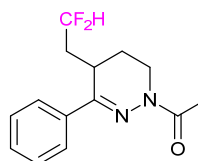

**1-(4-(2,2-Difluoroethyl)-3-phenyl-5,6-dihydropyridazin-1(4H)-yl)ethan-1-one (8aa, 33.6 mg, 63%)** colorless oil;  $^1\text{H}$  NMR (400 MHz,  $\text{CDCl}_3$ )  $\delta$  7.76-7.73 (m, 2H), 7.45-7.38 (m, 3H), 6.09-5.79 (m, 1H), 4.48-4.42 (m, 1H), 3.35-3.22 (m, 2H), 2.43 (s, 3H), 2.17-2.08 (m, 2H), 2.00-1.92 (m, 2H);  $^{13}\text{C}$  NMR (101 MHz,  $\text{CDCl}_3$ )  $\delta$  172.55, 147.48, 135.69, 129.50, 128.79, 125.76, 115.79 (t,  $J_{\text{C-F}} = 241.1$  Hz), 35.87 (t,  $J_{\text{C-F}} = 20.9$  Hz), 34.76, 24.87 (t,  $J_{\text{C-F}} = 4.6$  Hz), 21.84, 21.38;  $^{19}\text{F}$  NMR (752 MHz,  $\text{CDCl}_3$ )  $\delta$  -75.65 (d,  $J = 262.6$  Hz, 2F). HRMS (ESI)  $m/z$  calcd for  $\text{C}_{14}\text{H}_{17}\text{F}_2\text{N}_2\text{O}$  [ $\text{M}+\text{H}^+$ ]: 267.1303, found 267.1299.



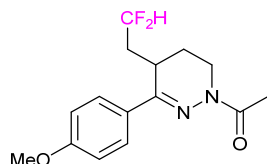

**1-(4-(2,2-Difluoroethyl)-3-(4-methoxyphenyl)-5,6-dihydropyridazin-1(4H)-yl)ethan-1-one (8ba, 29.0 mg, 49%)** colorless oil;  $^1\text{H NMR}$  (400 MHz,  $\text{CDCl}_3$ )  $\delta$  7.69 (d,  $J = 8.4$  Hz, 1H), 6.93 (d,  $J = 8.5$  Hz, 2H), 6.08-5.78 (m, 1H), 4.47-4.42 (m, 1H), 3.85 (s, 3H), 3.30-3.18 (m, 2H), 2.41 (s, 3H), 2.14-1.90 (m, 4H);  $^{13}\text{C NMR}$  (101 MHz,  $\text{CDCl}_3$ )  $\delta$  172.38, 160.70, 147.34, 129.66, 128.24, 127.18, 115.83 (t,  $J_{\text{C-F}} = 241.1$  Hz), 114.12, 55.39, 35.94 (t,  $J_{\text{C-F}} = 21.0$  Hz), 34.64, 24.80 (t,  $J_{\text{C-F}} = 4.7$  Hz), 21.89, 21.35;  $^{19}\text{F NMR}$  (752 MHz,  $\text{CDCl}_3$ )  $\delta$  -115.43 (ddt,  $J = 283.1, 56.2, 18.6$  Hz, 1F), -116.89 (ddt,  $J = 290.6, 55.9, 16.6$  Hz, 1F). HRMS (ESI)  $m/z$  calcd for  $\text{C}_{15}\text{H}_{19}\text{F}_2\text{N}_2\text{O}_2$   $[\text{M}+\text{H}^+]$ : 297.1409, found 297.1412.

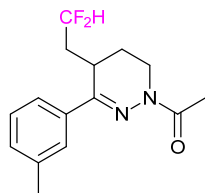

**1-(4-(2,2-Difluoroethyl)-3-(m-tolyl)-5,6-dihydropyridazin-1(4H)-yl)ethan-1-one (8ca, 39.2 mg, 61%)** colorless oil;  $^1\text{H NMR}$  (400 MHz,  $\text{CDCl}_3$ )  $\delta$  7.54-5.51 (m, 2H), 7.31 (t,  $J = 7.7$  Hz, 1H), 7.21 (d,  $J = 7.6$  Hz, 1H), 6.07-5.78 (m, 1H), 4.46-4.41 (m, 1H), 3.33-3.22 (m, 2H), 2.43 (s, 3H), 2.40 (s, 3H), 2.15-1.91 (m, 4H);  $^{13}\text{C NMR}$  (101 MHz,  $\text{CDCl}_3$ )  $\delta$  172.50, 147.76, 138.43, 135.74, 130.28, 128.66, 126.46, 122.96, 115.83 (t,  $J_{\text{C-F}} = 241.2$  Hz), 35.95 (t,  $J_{\text{C-F}} = 20.9$  Hz), 34.77, 25.02 (t,  $J_{\text{C-F}} = 4.6$  Hz), 21.92, 21.62, 21.37;  $^{19}\text{F NMR}$  (752 MHz,  $\text{CDCl}_3$ )  $\delta$  -115.28 (ddt,  $J = 283.1, 56.0, 18.5$  Hz, 1F), -116.91 (ddt,  $J = 283.1, 55.9, 16.8$  Hz, 1F). HRMS (ESI)  $m/z$  calcd for  $\text{C}_{15}\text{H}_{19}\text{F}_2\text{N}_2\text{O}$   $[\text{M}+\text{H}^+]$ : 281.1460, found 281.1458.

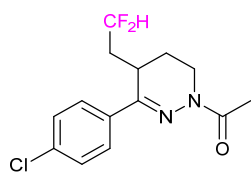

**1-(3-(4-chlorophenyl)-4-(2,2-difluoroethyl)-5,6-dihydropyridazin-1(4H)-yl)ethan-1-one (8ga, 28.3 mg, 47%)** colorless oil;  $^1\text{H NMR}$  (400 MHz,  $\text{CDCl}_3$ )  $\delta$  7.67 (d,  $J = 8.6$  Hz, 2H), 7.37 (d,  $J = 8.6$  Hz, 2H), 6.09-5.79 (m, 1H), 4.48-4.43 (m, 1H), 3.29-3.12 (m, 2H), 2.41 (s, 3H), 2.16-1.90 (m, 4H);  $^{13}\text{C NMR}$  (101 MHz,  $\text{CDCl}_3$ )  $\delta$  172.45, 146.27, 135.43, 134.15, 128.97, 127.01, 115.65 (t,  $J_{\text{C-F}} = 241.3$  Hz), 35.82 (t,  $J_{\text{C-F}} = 21.1$  Hz), 34.67, 24.73 (t,  $J_{\text{C-F}} = 4.1$  Hz), 21.75, 21.35;  $^{19}\text{F NMR}$  (752 MHz,  $\text{CDCl}_3$ )  $\delta$  -115.66 (dddd,  $J = 283.4, 56.0, 20.1, 18.6$  Hz, 1F), -116.88 (ddt,  $J = 283.3, 55.8, 16.6$  Hz, 1F). HRMS (ESI)  $m/z$  calcd for  $\text{C}_{14}\text{H}_{16}\text{ClF}_2\text{N}_2\text{O}$   $[\text{M}+\text{H}^+]$ : 301.0914, found 301.0919.

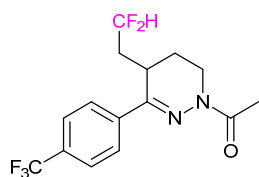

**1-(4-(2,2-Difluoroethyl)-3-(4-(trifluoromethyl)phenyl)-5,6-dihydropyridazin-1(4H)-yl)ethan-1-one (8ia, 33.4 mg, 50%)** colorless oil;  $^1\text{H}$  NMR (400 MHz,  $\text{CDCl}_3$ )  $\delta$  7.86 (d,  $J = 8.2$  Hz, 2H), 7.66 (d,  $J = 8.2$  Hz, 2H), 6.11-5.81 (m, 1H), 4.50-4.43 (m, 1H), 3.35-3.21 (m, 2H), 2.43 (s, 3H), 2.19-1.91 (m, 4H);  $^{13}\text{C}$  NMR (101 MHz,  $\text{CDCl}_3$ )  $\delta$  172.55, 145.86, 139.07, 131.03 (q,  $J_{\text{C-F}} = 32.5$  Hz), 125.99, 125.71 (q,  $J_{\text{C-F}} = 3.8$  Hz), 123.96 (q,  $J_{\text{C-F}} = 273.0$  Hz), 115.58 (t,  $J_{\text{C-F}} = 241.3$  Hz), 35.77 (t,  $J_{\text{C-F}} = 20.9$  Hz), 34.77, 24.77 (t,  $J_{\text{C-F}} = 4.3$  Hz), 21.68, 21.33;  $^{19}\text{F}$  NMR (752 MHz,  $\text{CDCl}_3$ )  $\delta$  -62.79 (s, 3F), -115.79 (dddd,  $J = 283.9, 56.0, 20.1, 17.7$  Hz, 1F), -116.91 (dddd,  $J = 283.7, 55.7, 17.4, 15.2$  Hz, 1F). HRMS (ESI)  $m/z$  calcd for  $\text{C}_{15}\text{H}_{16}\text{F}_5\text{N}_2\text{O}$  [ $\text{M}+\text{H}^+$ ]: 335.1177, found 335.1168.

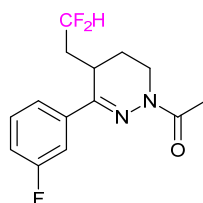

**1-(4-(2,2-difluoroethyl)-3-(3-fluorophenyl)-5,6-dihydropyridazin-1(4H)-yl)ethan-1-one (8ja, 32.4 mg, 57%)** colorless oil;  $^1\text{H}$  NMR (400 MHz,  $\text{CDCl}_3$ )  $\delta$  7.53-7.46 (m, 2H), 7.41-7.35 (m, 1H), 7.11-7.06 (m, 1H), 6.11-5.81 (m, 1H), 4.49-4.44 (m, 1H), 3.30-3.19 (m, 2H), 2.42 (s, 3H), 2.17-1.92 (m, 4H);  $^{13}\text{C}$  NMR (101 MHz,  $\text{CDCl}_3$ )  $\delta$  172.53, 163.12 (d,  $J_{\text{C-F}} = 246.7$  Hz), 146.03 (d,  $J_{\text{C-F}} = 2.8$  Hz), 138.07 (d,  $J_{\text{C-F}} = 7.5$  Hz), 130.29 (d,  $J_{\text{C-F}} = 8.3$  Hz), 121.24 (d,  $J_{\text{C-F}} = 2.8$  Hz), 116.38 (d,  $J_{\text{C-F}} = 21.6$  Hz), 115.66 (t,  $J_{\text{C-F}} = 241.2$  Hz), 112.63 (d,  $J_{\text{C-F}} = 23.3$  Hz), 35.78 (t,  $J_{\text{C-F}} = 21.0$  Hz), 34.74, 24.87 (t,  $J_{\text{C-F}} = 4.5$  Hz), 21.65, 21.37;  $^{19}\text{F}$  NMR (752 MHz,  $\text{CDCl}_3$ )  $\delta$  -112.14 (d,  $J = 9.2$  Hz, 1F), -115.52 (ddt,  $J = 283.5, 56.0, 19.3$  Hz, 1F), -116.90 (ddt,  $J = 283.7, 55.8, 16.5$  Hz, 1F). HRMS (ESI)  $m/z$  calcd for  $\text{C}_{14}\text{H}_{17}\text{F}_3\text{N}_2\text{O}$  [ $\text{M}+\text{H}^+$ ]: 285.1209, found 285.1212.

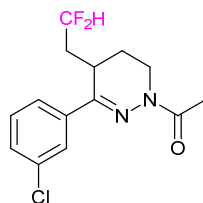

**1-(3-(3-Chlorophenyl)-4-(2,2-difluoroethyl)-5,6-dihydropyridazin-1(4H)-yl)ethan-1-one (8ka, 36.7 mg, 61%)** colorless oil;  $^1\text{H}$  NMR (400 MHz,  $\text{CDCl}_3$ )  $\delta$  7.74 (s, 1H), 7.60-7.57 (m, 1H), 7.37-7.32 (m, 2H), 6.10-5.80 (m, 1H), 4.48-4.42 (m, 1H), 3.29-3.19 (m, 2H), 2.42 (s, 3H), 2.17-1.91 (m, 4H);  $^{13}\text{C}$  NMR (101 MHz,  $\text{CDCl}_3$ )  $\delta$  172.51, 145.95, 137.57, 134.92, 129.99, 129.40, 125.91, 123.74, 115.65 (t,  $J_{\text{C-F}} = 241.4$  Hz), 35.77 (t,  $J_{\text{C-F}} = 20.8$  Hz), 34.75, 24.85 (t,  $J_{\text{C-F}} = 4.5$  Hz), 21.69, 21.39;  $^{19}\text{F}$  NMR (752 MHz,  $\text{CDCl}_3$ )  $\delta$  -115.51 (dddd,  $J = 283.6, 56.0, 20.1, 17.3$  Hz, 1F), -116.89 (ddt,  $J = 283.7, 55.7, 16.1$  Hz, 1F). HRMS (ESI)  $m/z$  calcd for

C<sub>14</sub>H<sub>16</sub>ClF<sub>2</sub>N<sub>2</sub>O [M+H<sup>+</sup>]: 301.0914, found 301.0909.

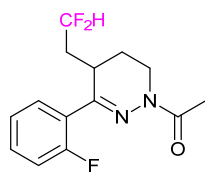

**1-(4-(2,2-Difluoroethyl)-3-(2-fluorophenyl)-5,6-dihydropyridazin-1(4H)-yl)ethan-1-one (8la, 39.2 mg, 69%)** colorless oil; <sup>1</sup>H NMR (400 MHz, CDCl<sub>3</sub>) δ 7.53 (t, *J* = 7.6 Hz, 1H), 7.41-7.35 (m, 1H), 7.20 (t, *J* = 7.6 Hz, 1H), 7.13-7.08 (m, 1H), 6.00-5.70 (m, 1H), 4.04-3.98 (m, 1H), 3.74-3.67 (m, 1H), 3.27-3.21 (m, 1H), 2.35 (s, 3H), 2.15-1.80 (m, 4H); <sup>13</sup>C NMR (101 MHz, CDCl<sub>3</sub>) δ 172.48, 160.42 (d, *J*<sub>C-F</sub> = 248.0 Hz), 146.66 (d, *J*<sub>C-F</sub> = 2.5 Hz), 130.92 (d, *J*<sub>C-F</sub> = 8.5 Hz), 130.08 (d, *J*<sub>C-F</sub> = 3.5 Hz), 124.80 (d, *J*<sub>C-F</sub> = 12.2 Hz), 124.61 (d, *J*<sub>C-F</sub> = 3.3 Hz), 115.98 (t, *J*<sub>C-F</sub> = 241.2 Hz), 116.35 (d, *J*<sub>C-F</sub> = 22.8 Hz), 36.38 (t, *J*<sub>C-F</sub> = 21.1 Hz), 36.07, 28.91 (q, *J*<sub>C-F</sub> = 5.3 Hz), 22.78, 21.20; <sup>19</sup>F NMR (752 MHz, CDCl<sub>3</sub>) δ -113.74 (ddt, *J* = 284.3, 56.4, 17.3 Hz, 1F), 115.12 (d, *J* = 10.5 Hz, 1F), -116.29 (dddd, *J* = 284.3, 56.4, 19.5, 15.8 Hz, 1F). HRMS (ESI) *m/z* calcd for C<sub>14</sub>H<sub>16</sub>F<sub>3</sub>N<sub>2</sub>O [M+H<sup>+</sup>]: 285.1209, found 285.1207.

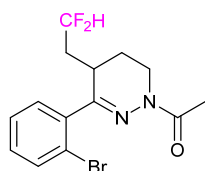

**1-(3-(2-bromophenyl)-4-(2,2-difluoroethyl)-5,6-dihydropyridazin-1(4H)-yl)ethan-1-one (8ma, 24.2 mg, 35%)** colorless oil; <sup>1</sup>H NMR (400 MHz, CDCl<sub>3</sub>) δ 7.56 (d, *J* = 7.7 Hz, 1H), 7.31 (t, *J* = 7.0 Hz, 1H), 7.20 (t, *J* = 7.2 Hz, 2H), 5.86-5.55 (m, 1H), 3.93-3.87 (m, 1H), 3.74-3.67 (m, 1H), 3.12-3.06 (m, 1H), 2.25-2.07 (m, 4H), 1.92-1.71 (m, 3H); <sup>13</sup>C NMR (101 MHz, CDCl<sub>3</sub>) δ 172.62, 149.96, 138.38, 133.37, 130.46, 130.24, 127.62, 122.22, 115.75 (t, *J*<sub>C-F</sub> = 241.3 Hz), 36.24, 35.59 (t, *J*<sub>C-F</sub> = 21.2 Hz), 29.64 (t, *J*<sub>C-F</sub> = 5.1 Hz), 22.64, 21.24; <sup>19</sup>F NMR (752 MHz, CDCl<sub>3</sub>) δ -114.15 (ddt, *J* = 283.6, 56.0, 17.4 Hz, 1F), -116.46 (ddt, *J* = 283.9, 55.9, 17.7 Hz, 1F). HRMS (ESI) *m/z* calcd for C<sub>14</sub>H<sub>16</sub>BrF<sub>2</sub>N<sub>2</sub>O [M+H<sup>+</sup>]: 345.0409, found 345.0415.

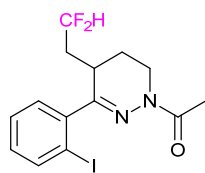

**1-(4-(2,2-Difluoroethyl)-3-(2-iodophenyl)-5,6-dihydropyridazin-1(4H)-yl)ethan-1-one (8na, 37.4 mg, 48%)** colorless oil; <sup>1</sup>H NMR (400 MHz, CDCl<sub>3</sub>) δ 7.91 (d, *J* = 8.0 Hz, 1H), 7.41 (t, *J* = 7.5 Hz, 1H), 7.22 (d, *J* = 7.6 Hz, 1H), 7.10 (t, *J* = 7.9 Hz, 1H), 5.92-5.61 (m, 1H), 4.07-4.02 (m, 1H), 3.73-3.66 (m, 1H), 3.09-3.06 (m, 1H), 2.31 (s, 3H), 2.23-2.15 (m, 1H), 2.04-1.81 (m, 3H); <sup>13</sup>C NMR (101 MHz, CDCl<sub>3</sub>) δ 172.67, 151.31, 141.91, 139.97, 130.25, 129.37, 128.31, 115.70 (t, *J*<sub>C-F</sub> = 241.3 Hz), 97.22, 35.97, 35.38 (t, *J*<sub>C-F</sub> = 21.3 Hz), 29.73 (t, *J*<sub>C-F</sub> = 5.1 Hz), 22.77, 21.36; <sup>19</sup>F NMR (752 MHz, CDCl<sub>3</sub>) δ -114.25 (ddt, *J* = 283.6, 56.1, 17.4 Hz, 1F), -116.68 (ddt, *J* = 283.7,

56.2, 17.3 Hz, 1F). HRMS (ESI) m/z calcd for C<sub>14</sub>H<sub>16</sub>IF<sub>2</sub>N<sub>2</sub>O [M+H<sup>+</sup>]: 393.0270, found 393.0261.

## 5. References

1. Y. Wu, X. Wu, L. Liu, J.-T. Yu and C. Pan, *Org. Lett.*, 2024, **26**, 122.
2. H. Jia, A. P. Häring, F. Berger, L. Zhang and T. Ritter, *J. Am. Chem. Soc.*, 2021, **143**, 7623.
3. R. Sakamoto, H. Kashiwagi and K. Maruoka, *Org. Lett.*, 2017, **19**, 5126.

## 6. Copies of the $^1\text{H}$ NMR, $^{13}\text{C}$ NMR and $^{19}\text{F}$ NMR Spectra

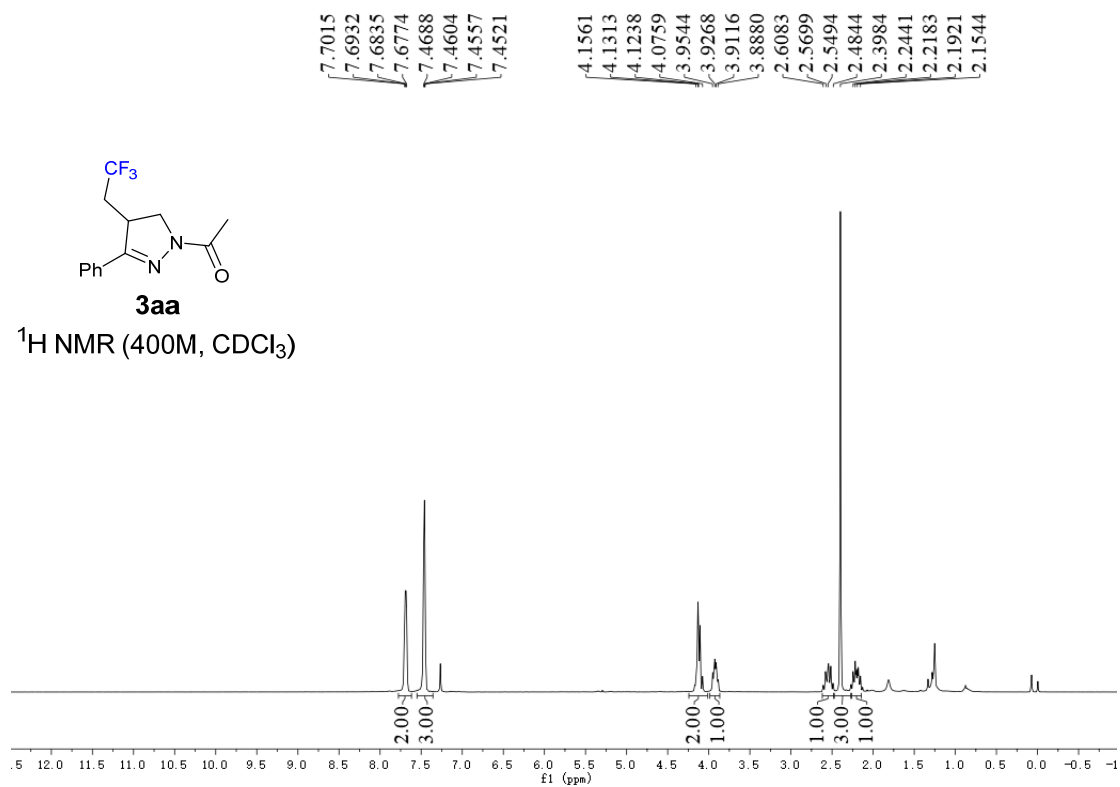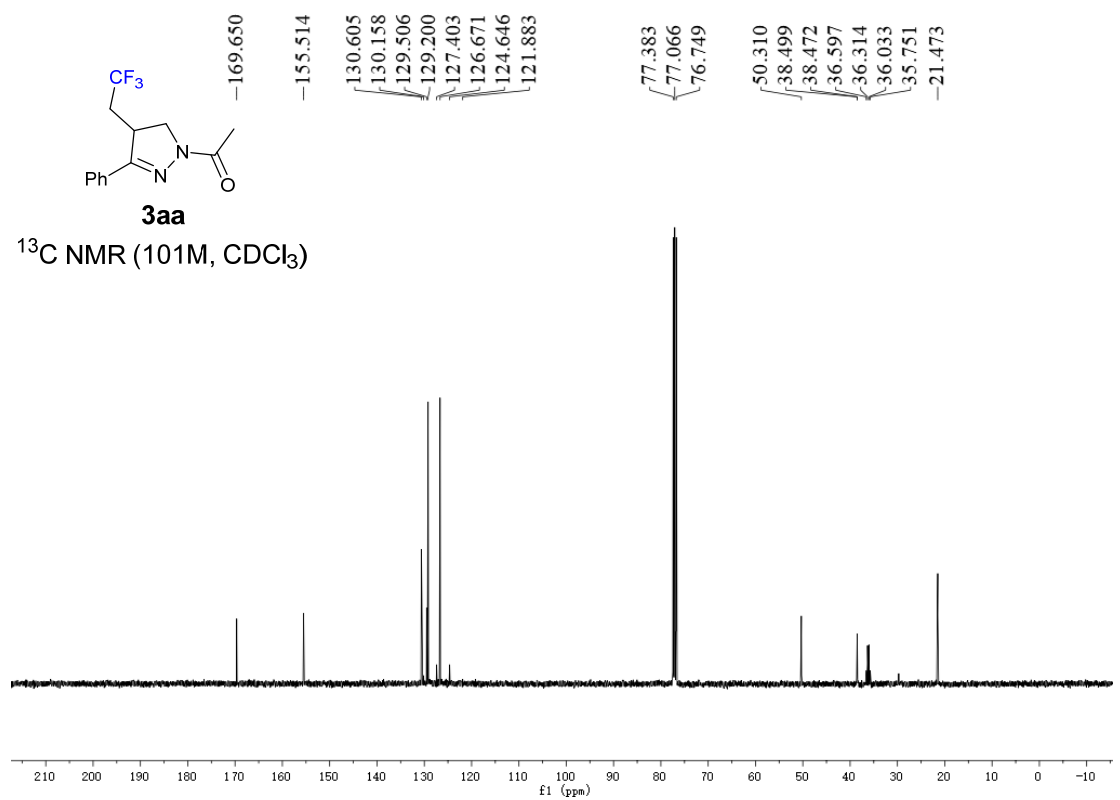

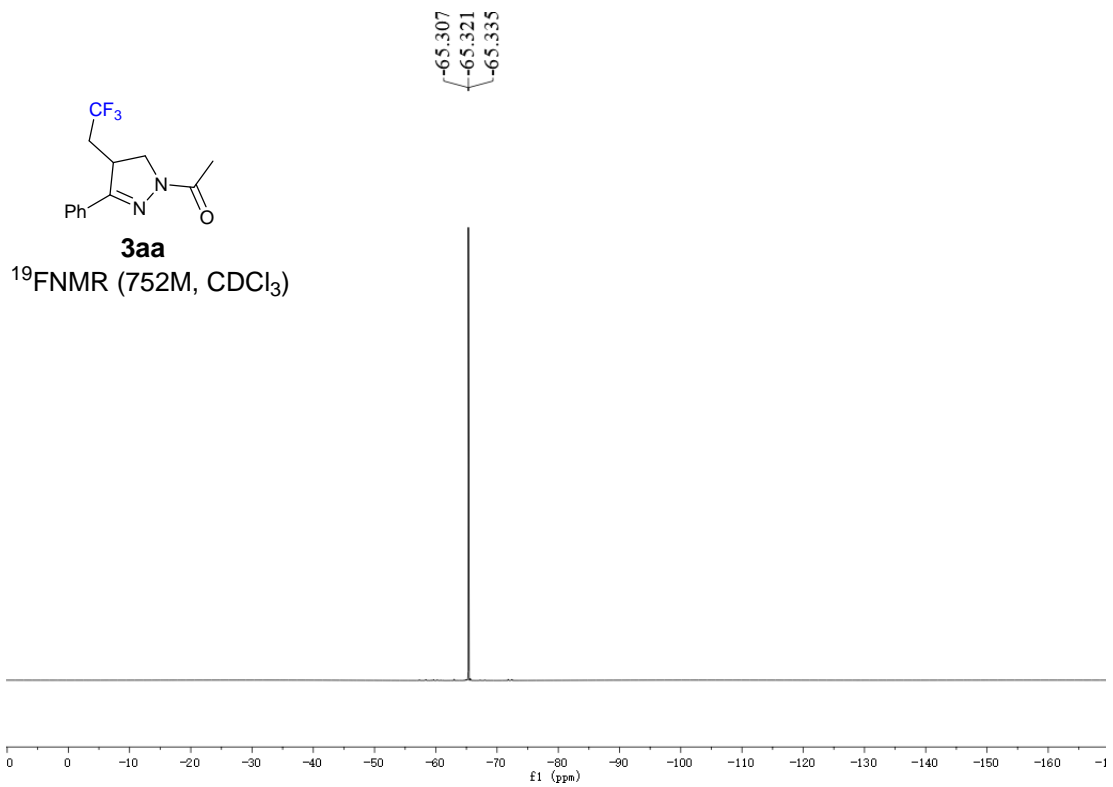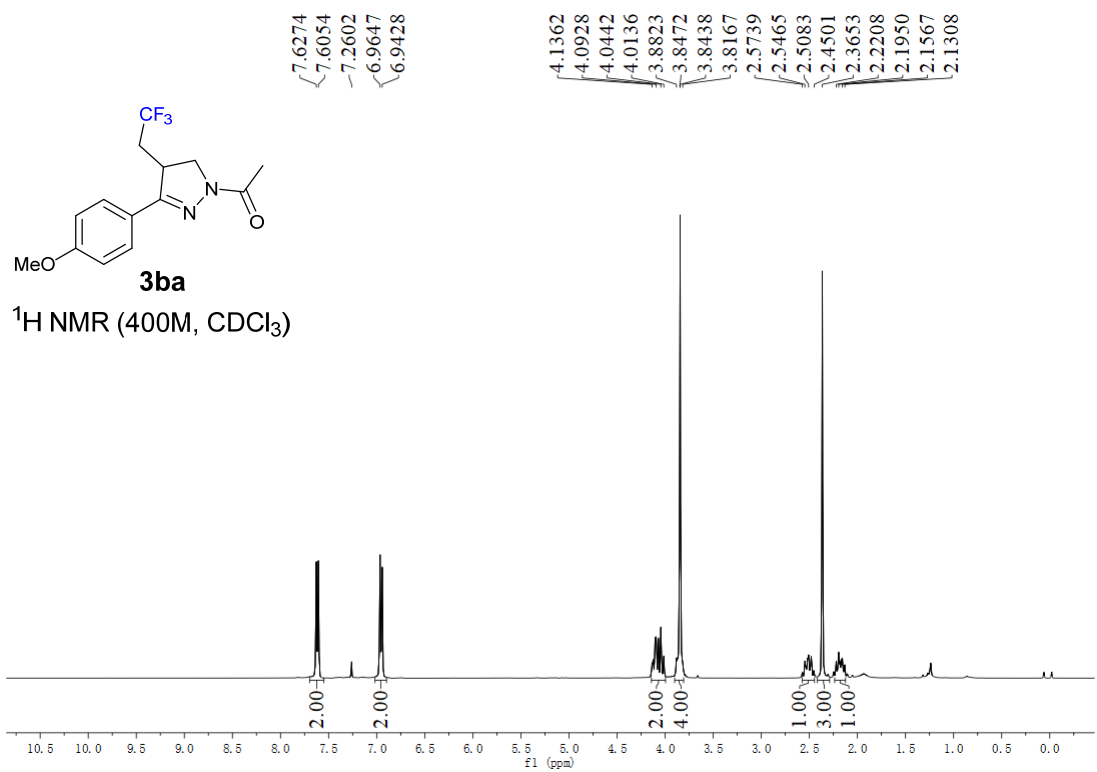

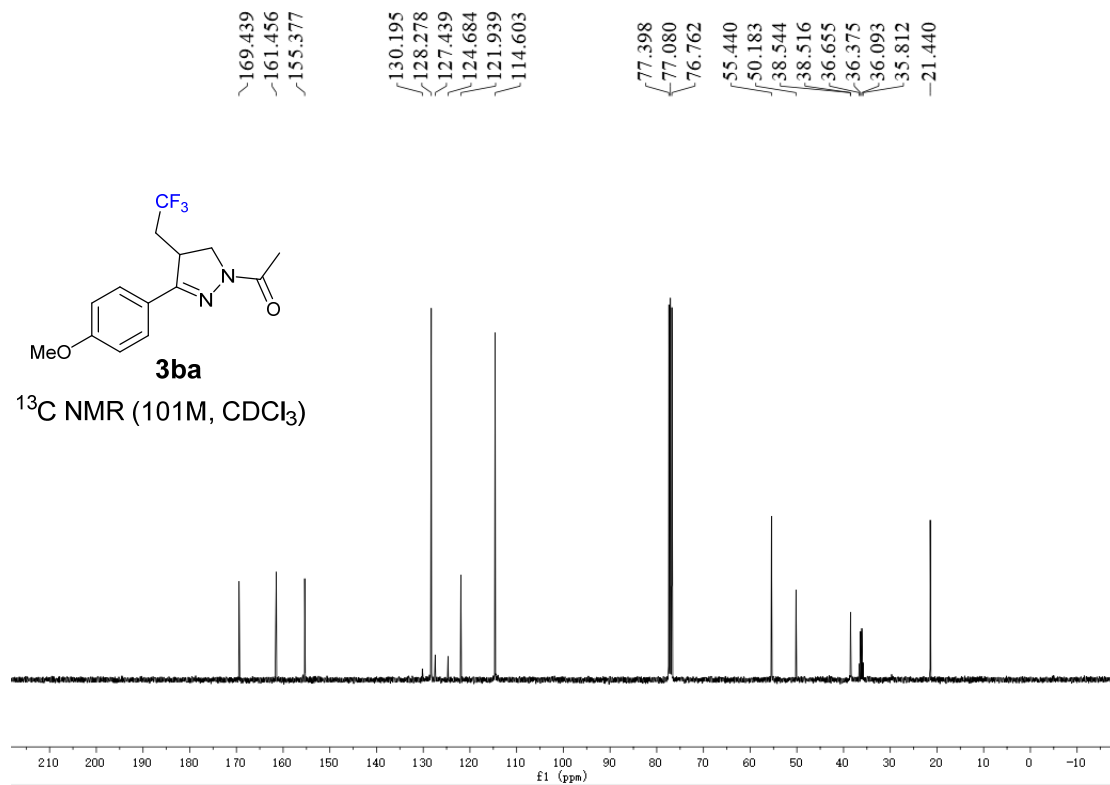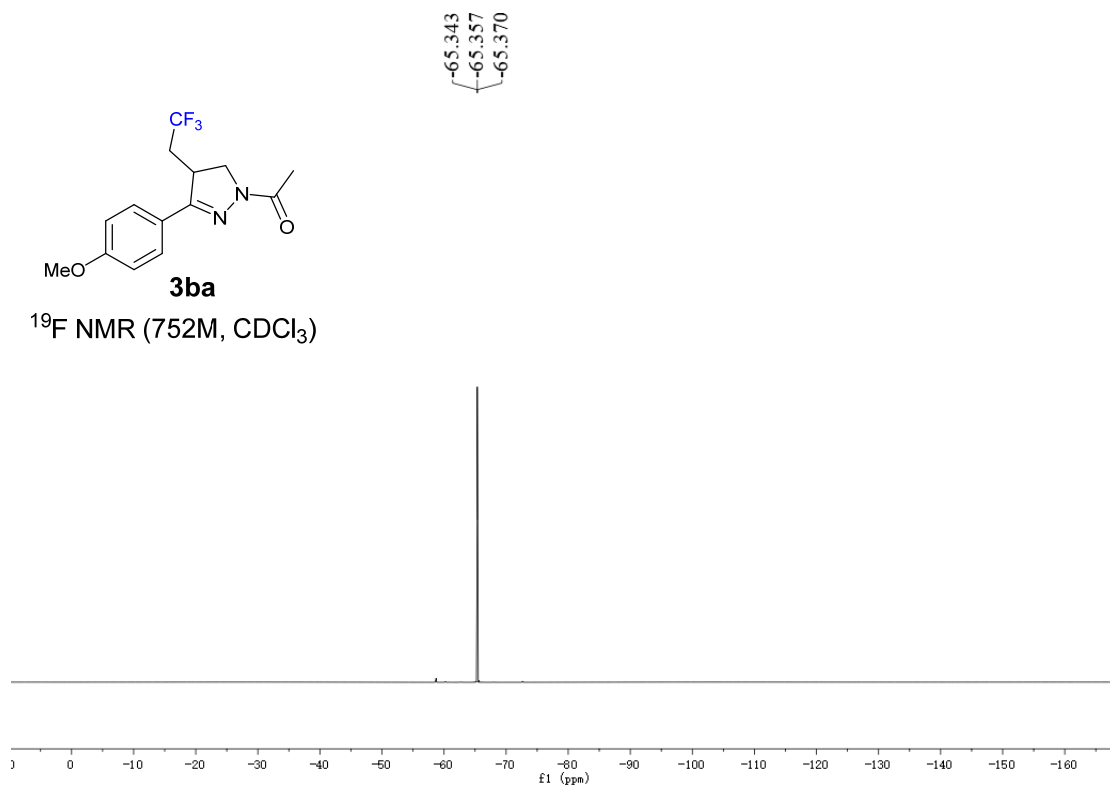

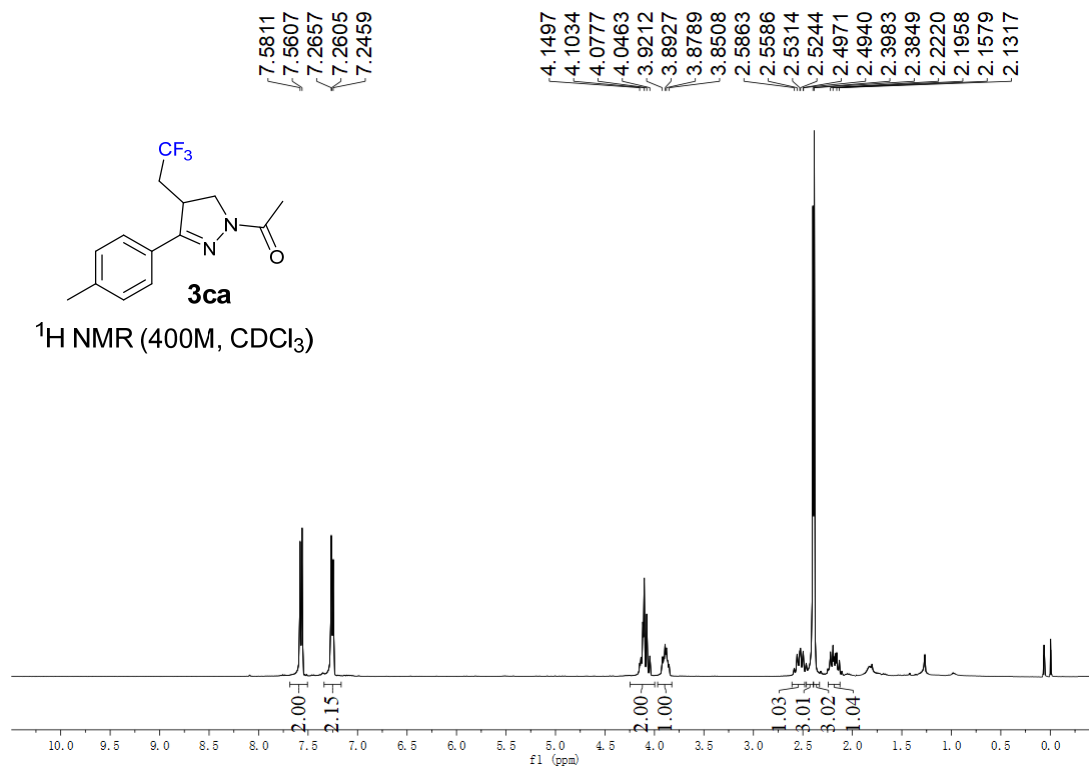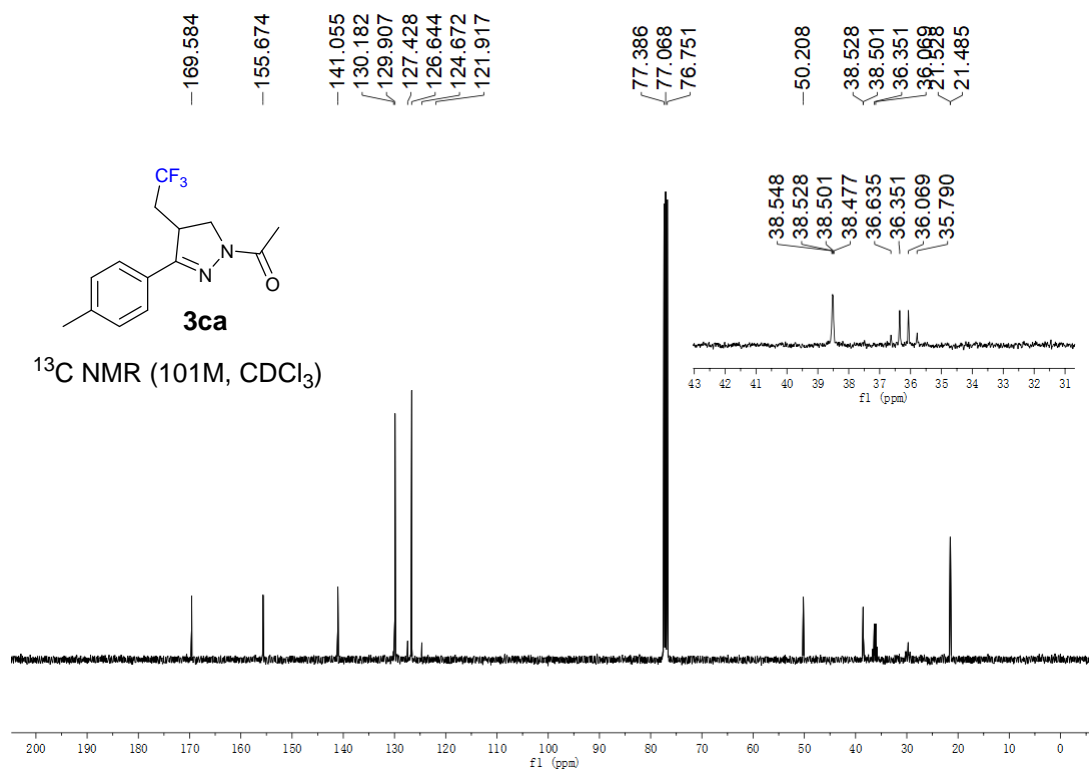



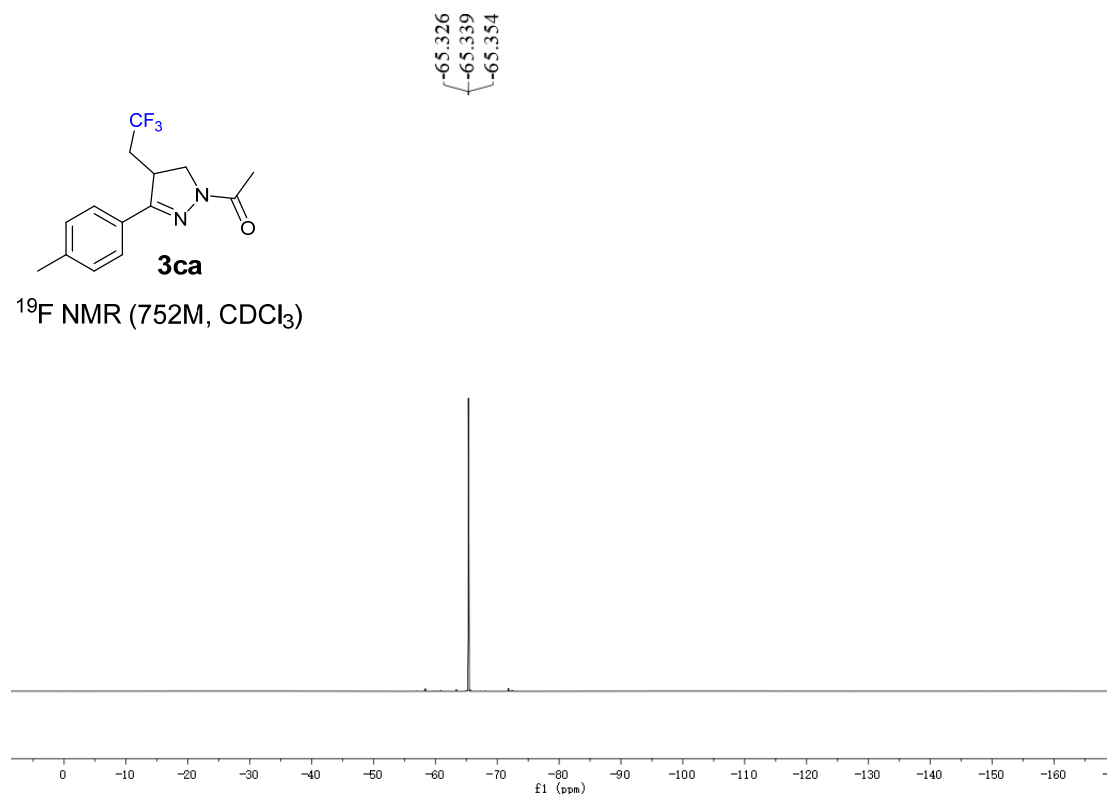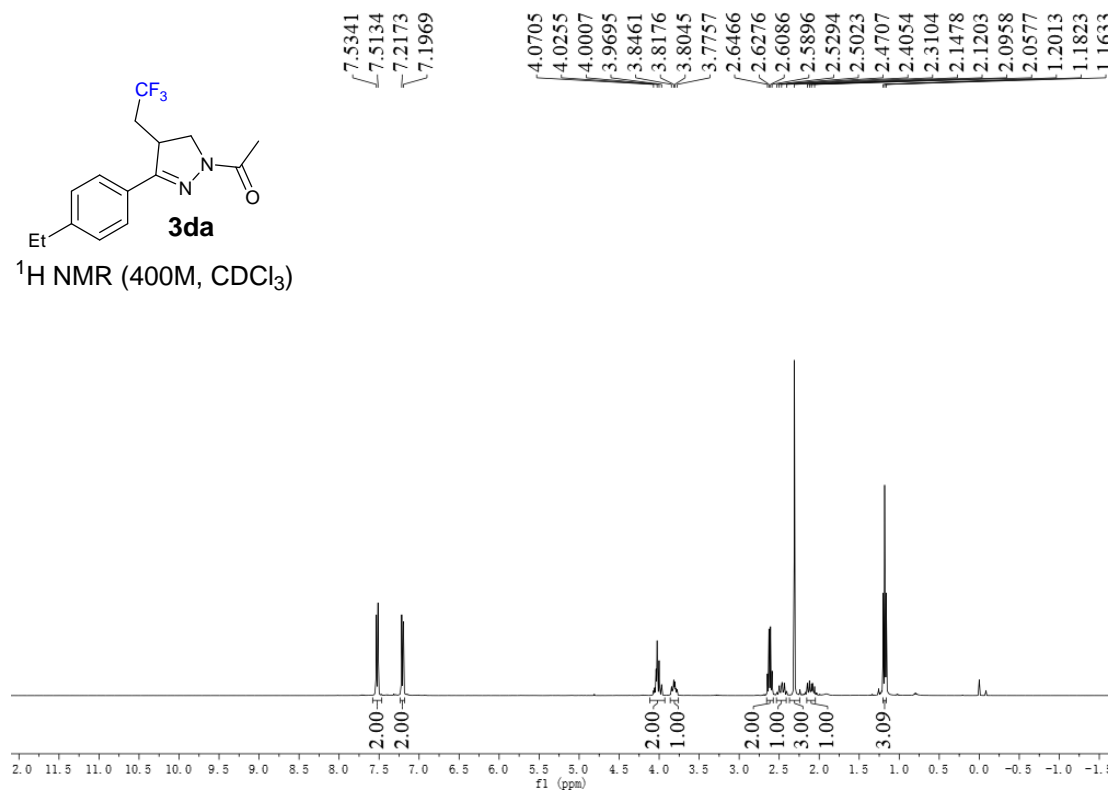

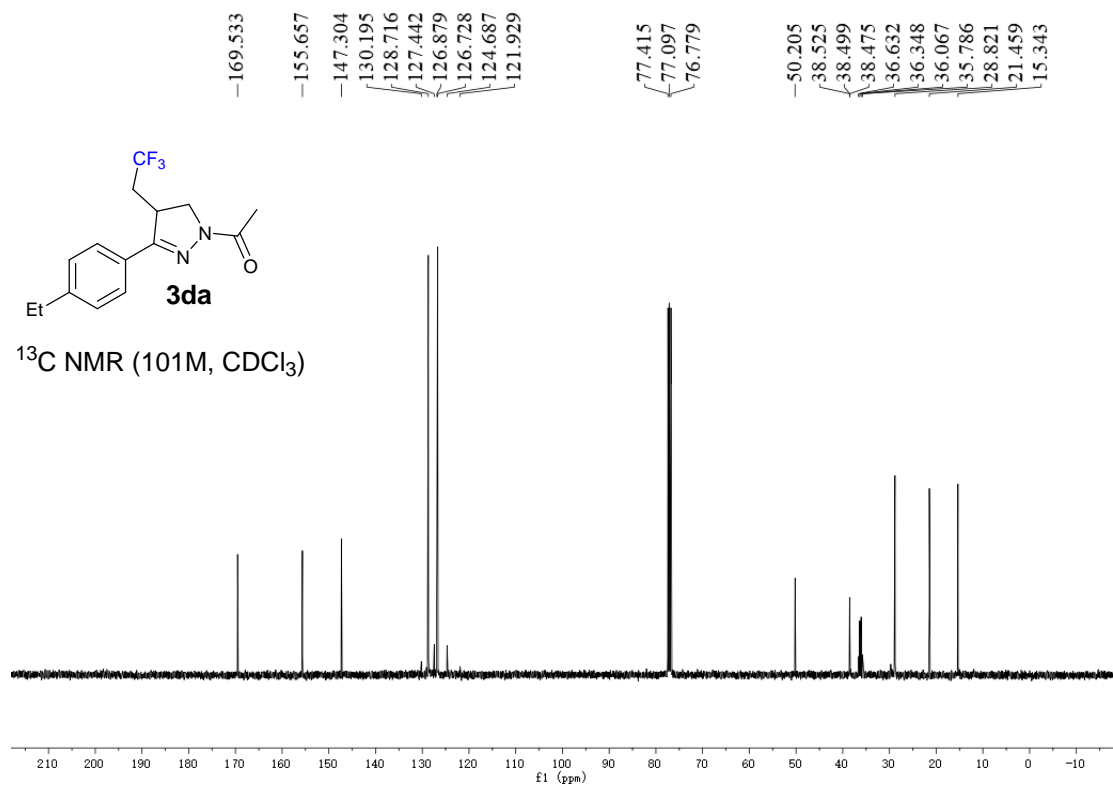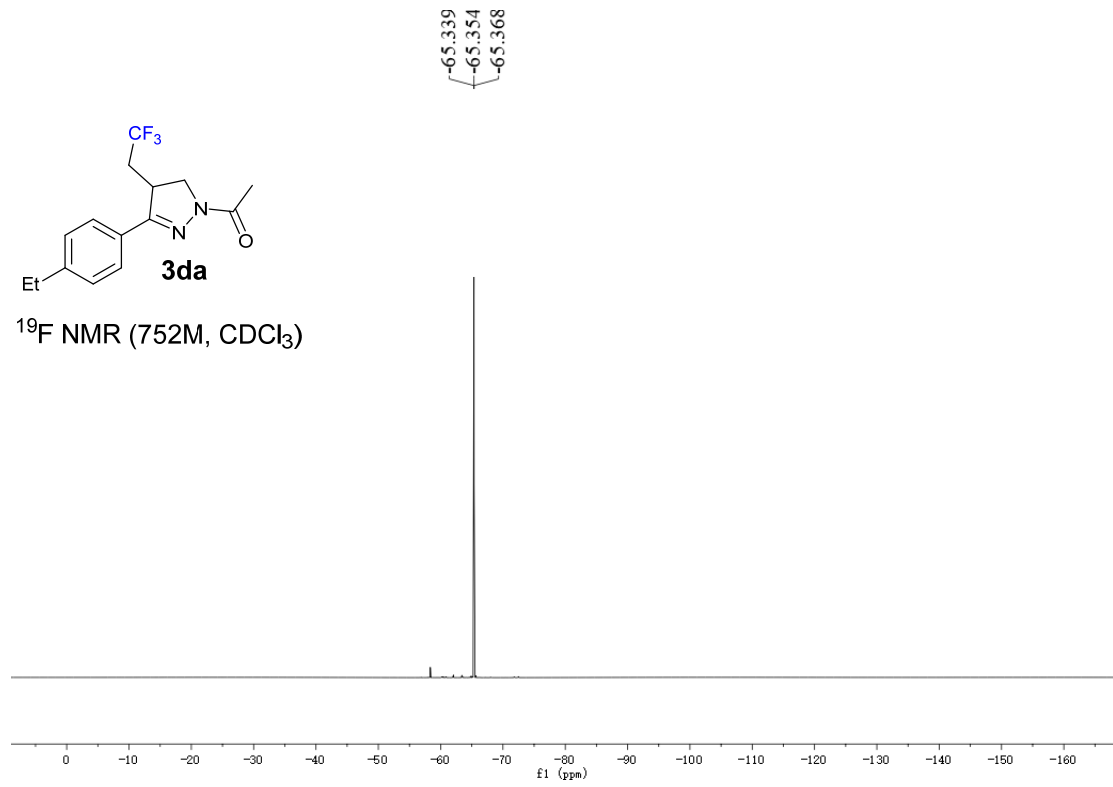

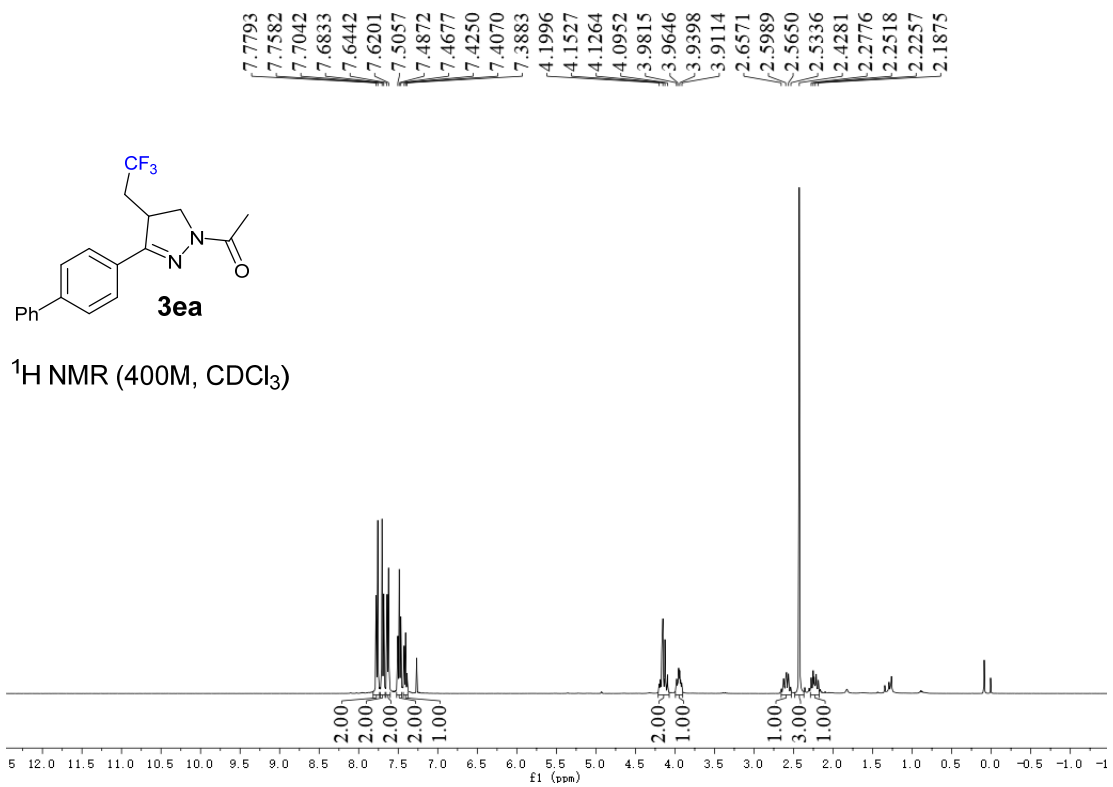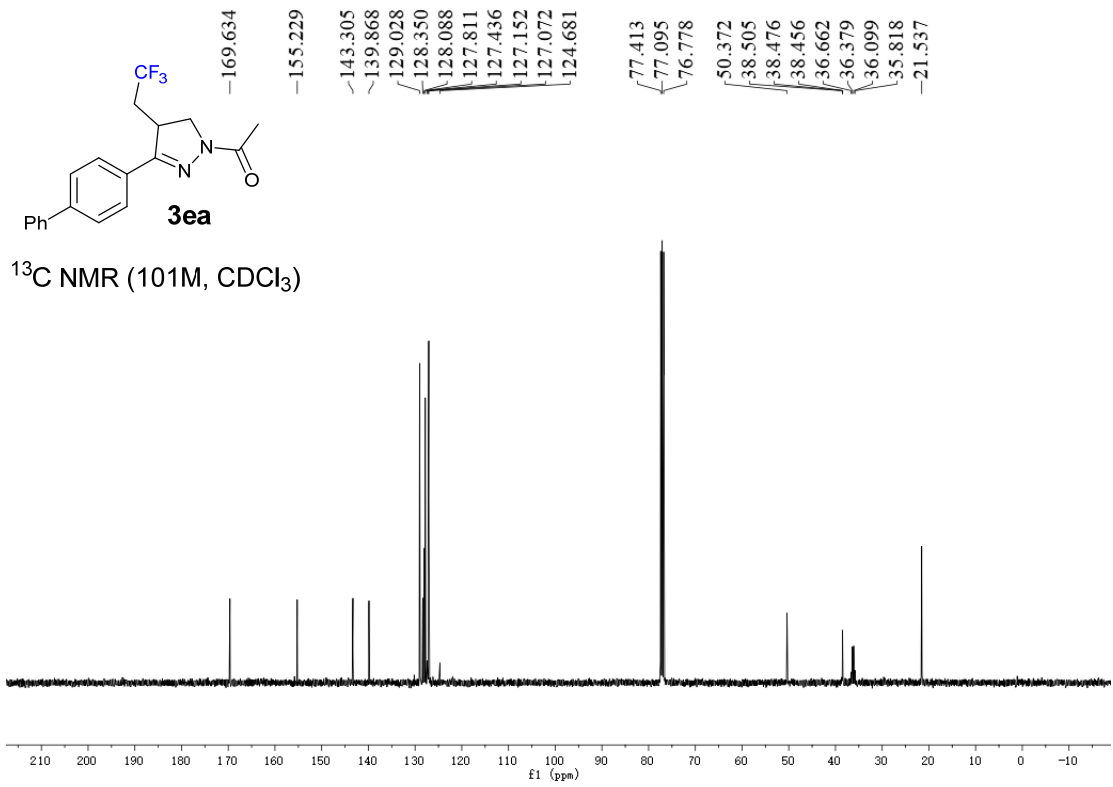

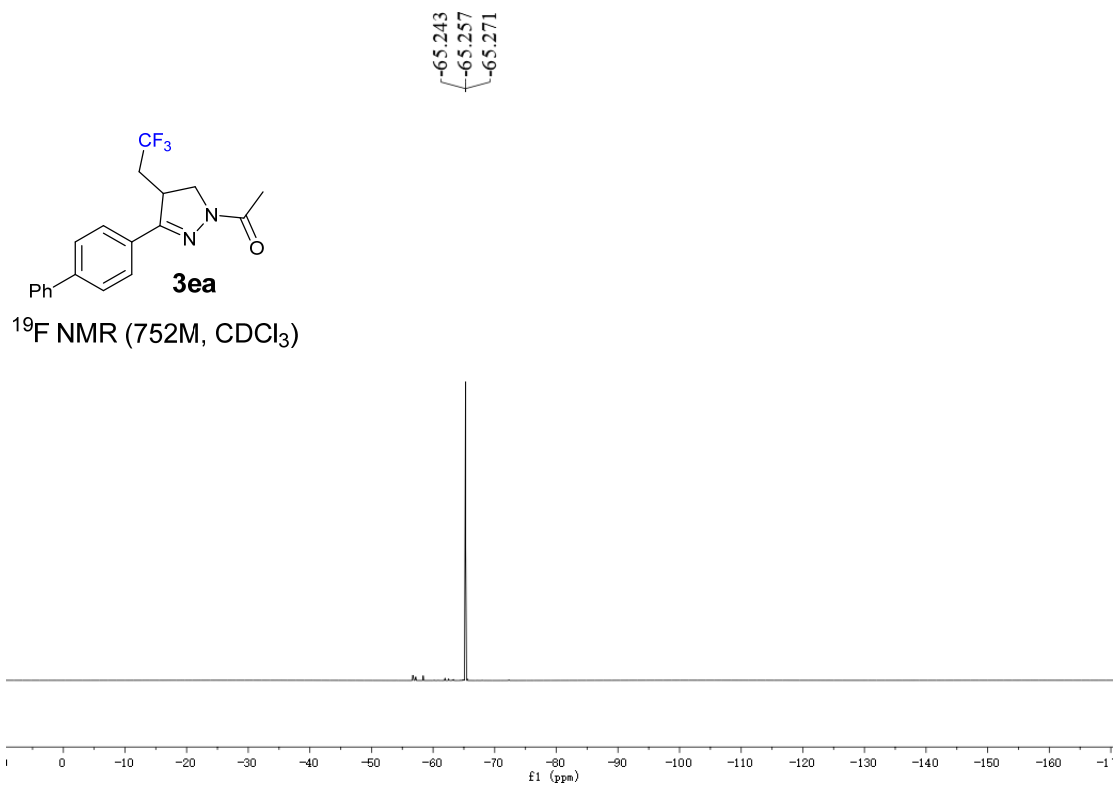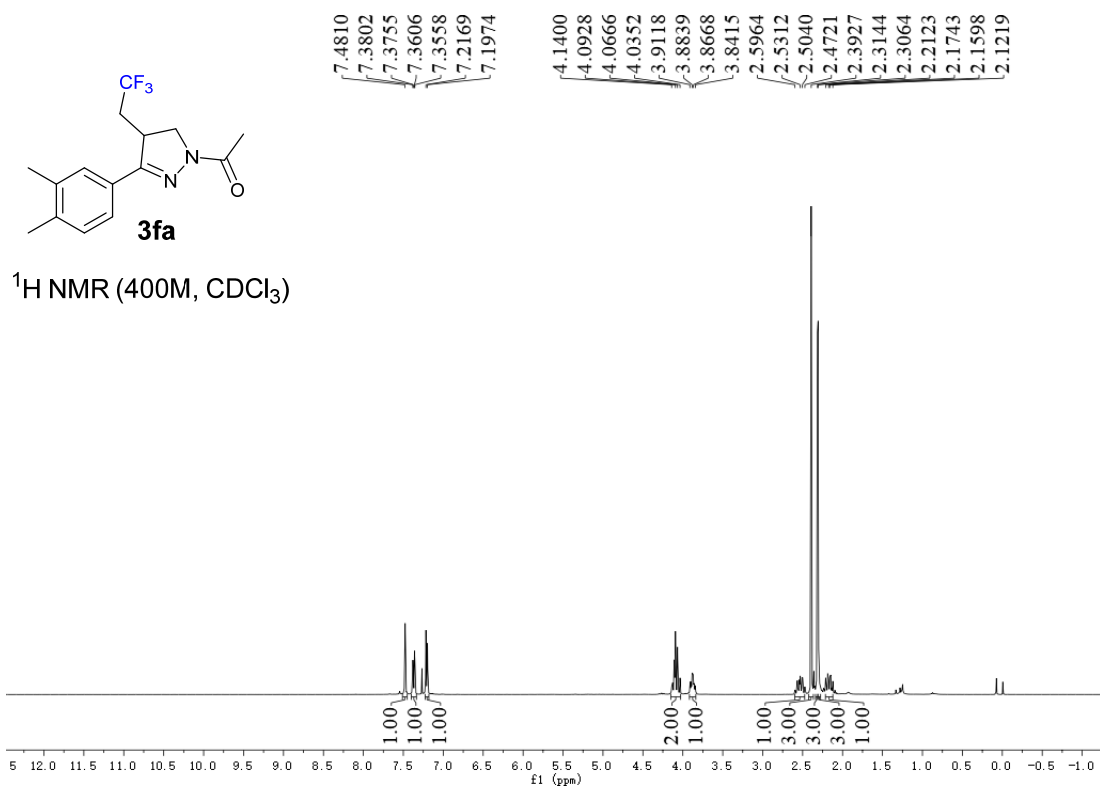

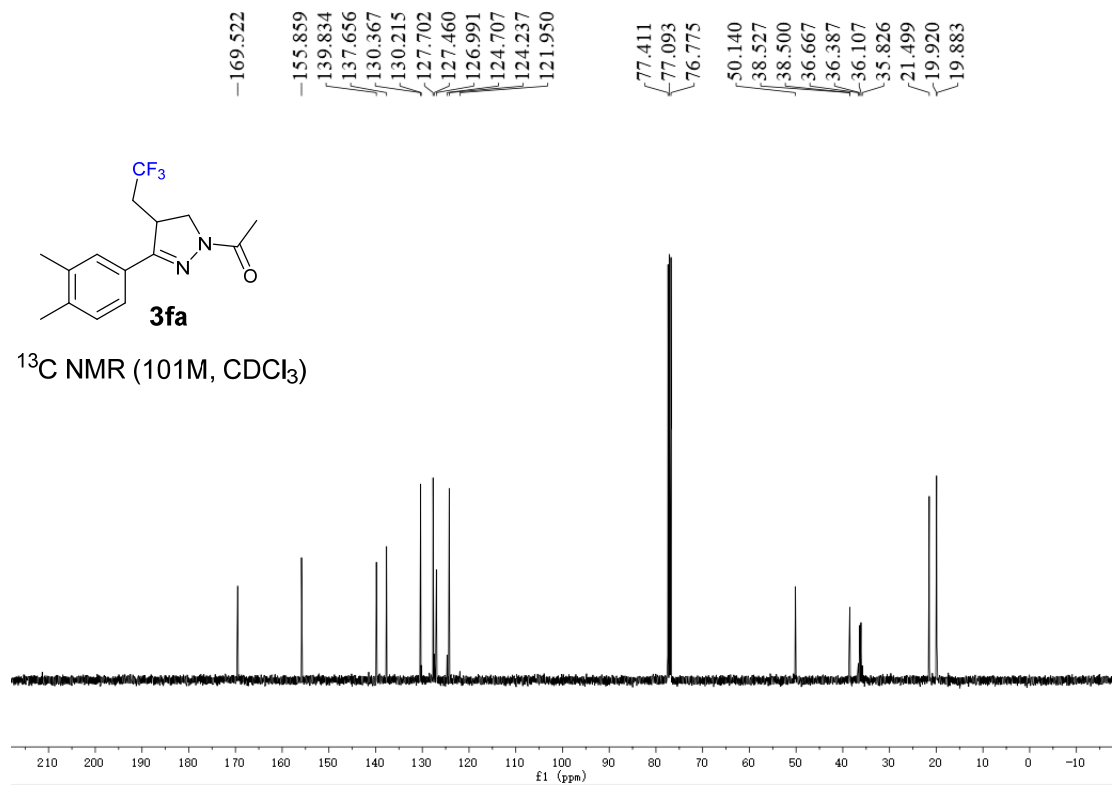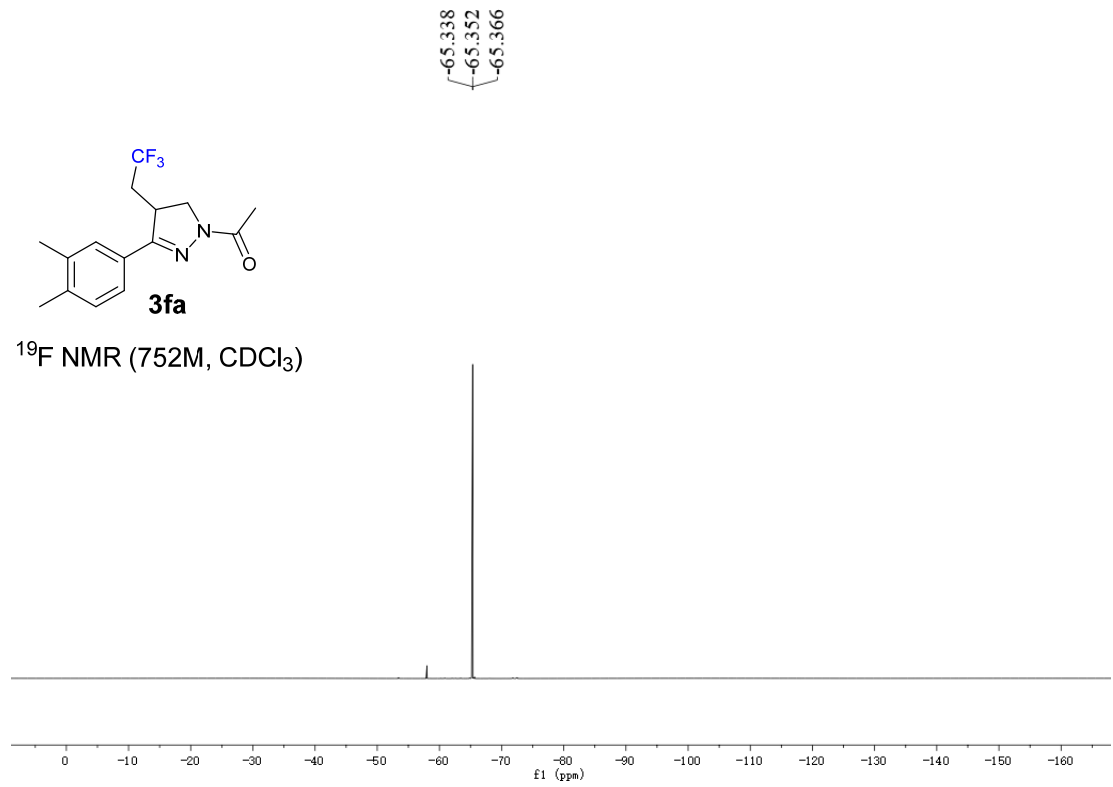

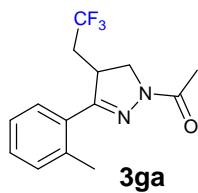

$^1\text{H NMR}$  (400M,  $\text{CDCl}_3$ )

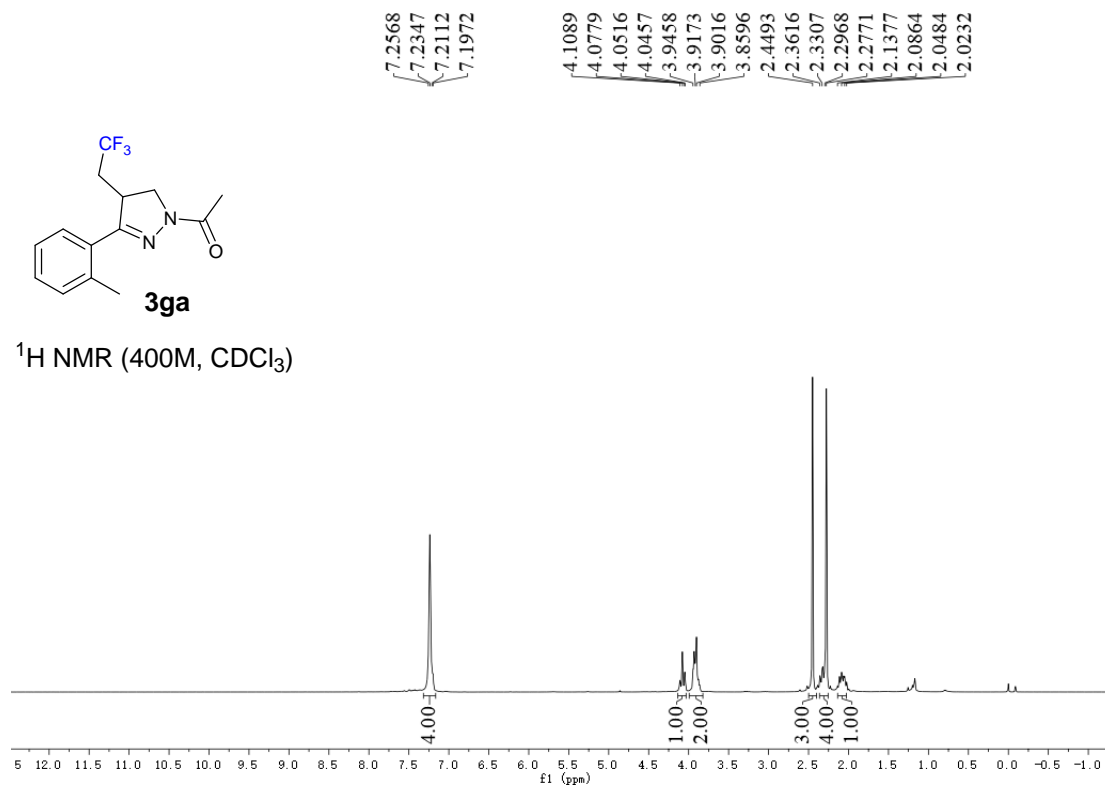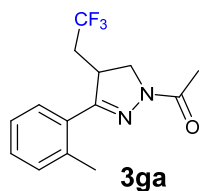

$^{13}\text{C NMR}$  (101M,  $\text{CDCl}_3$ )

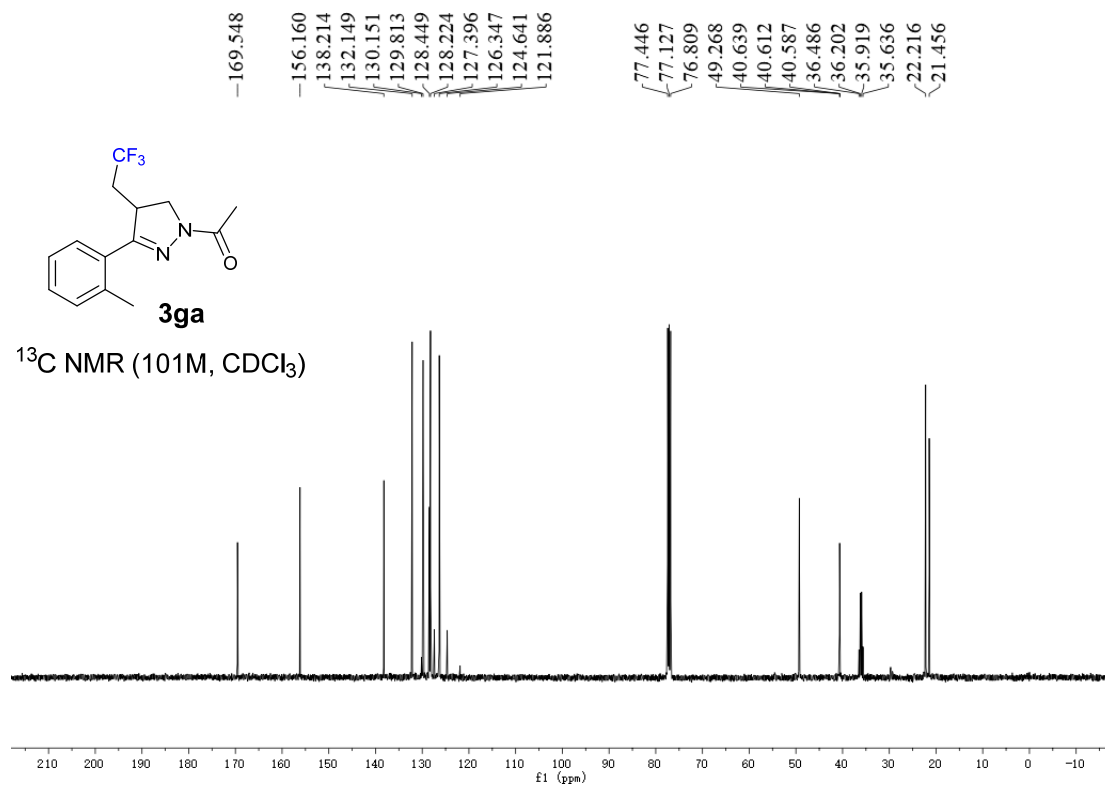

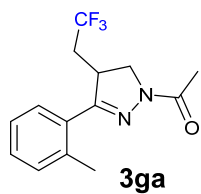

$^{19}\text{F}$  NMR (752M,  $\text{CDCl}_3$ )

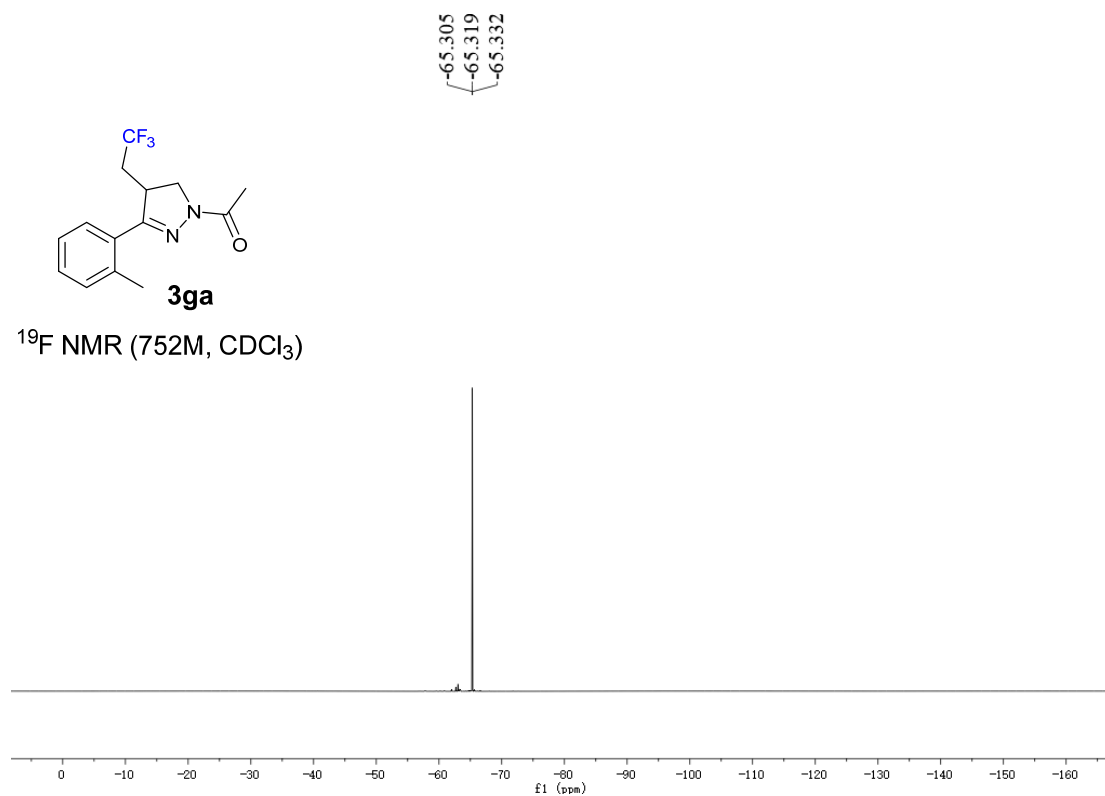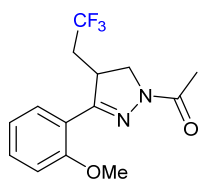

$^1\text{H}$  NMR (400M,  $\text{CDCl}_3$ )

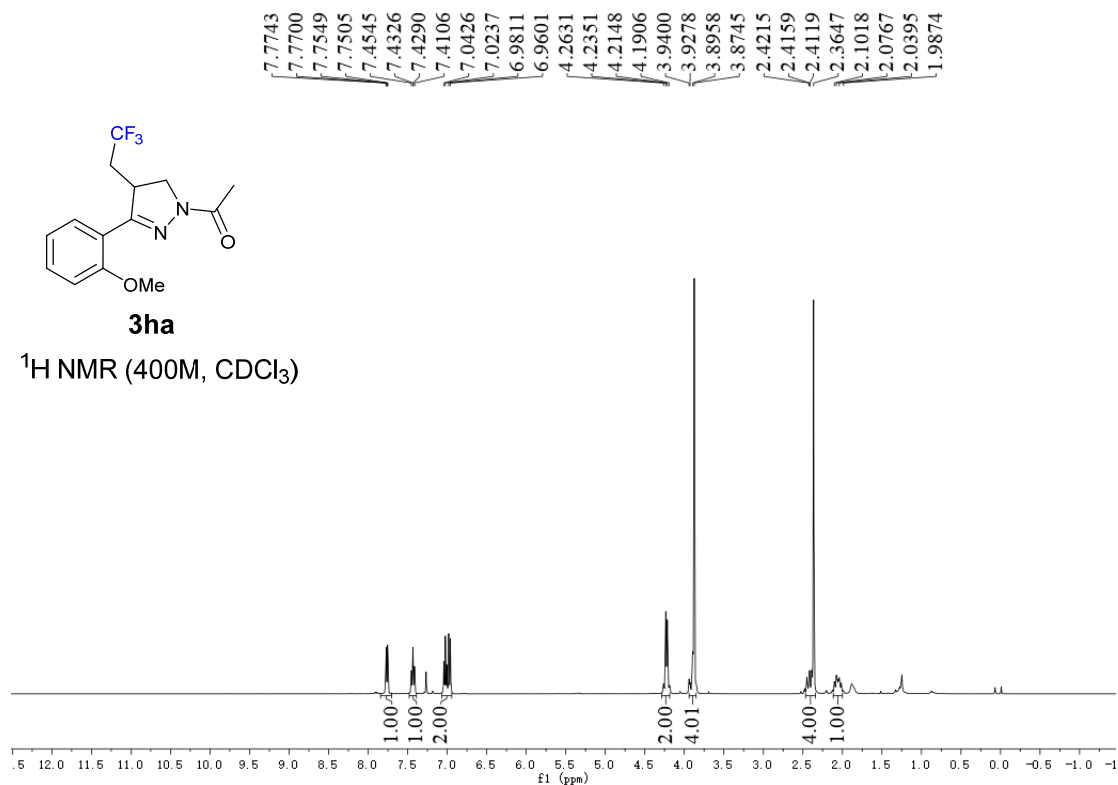

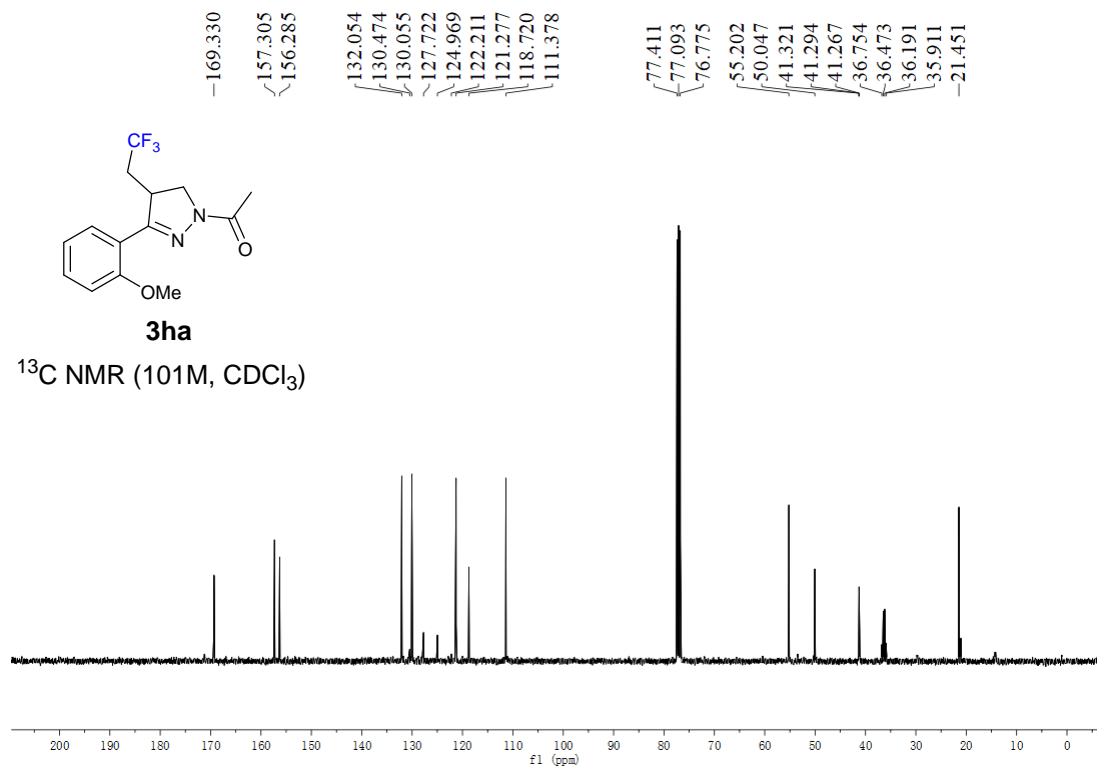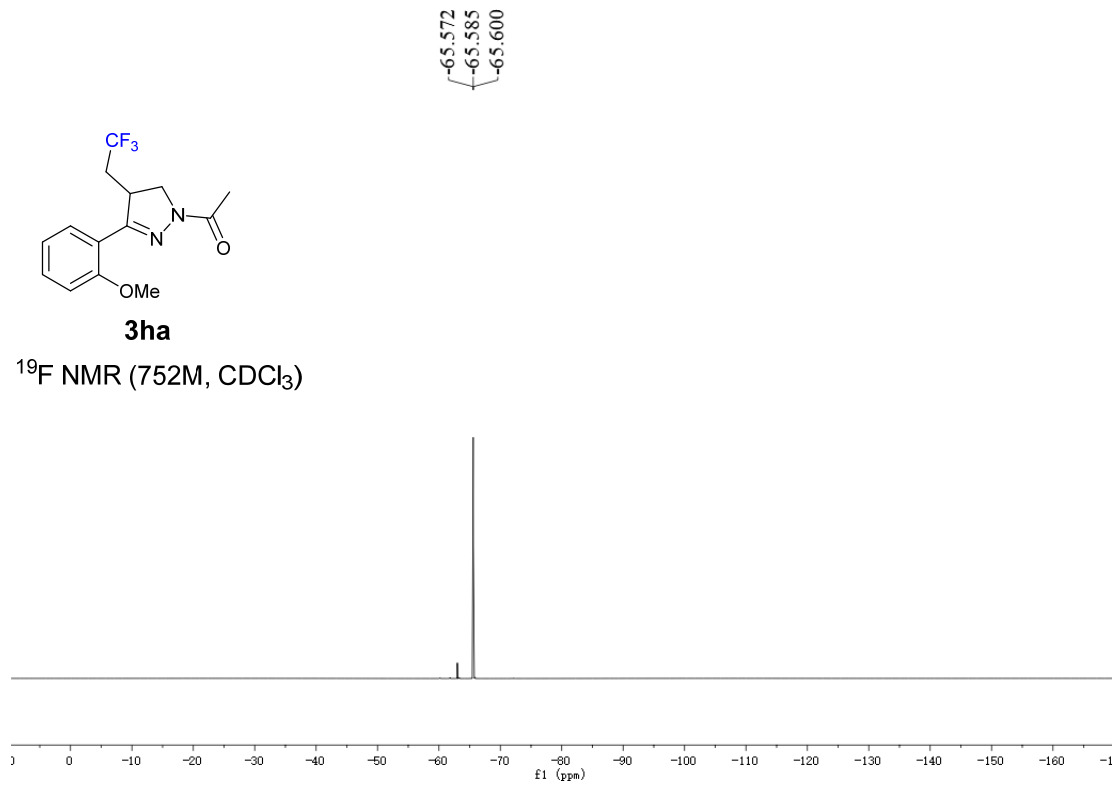



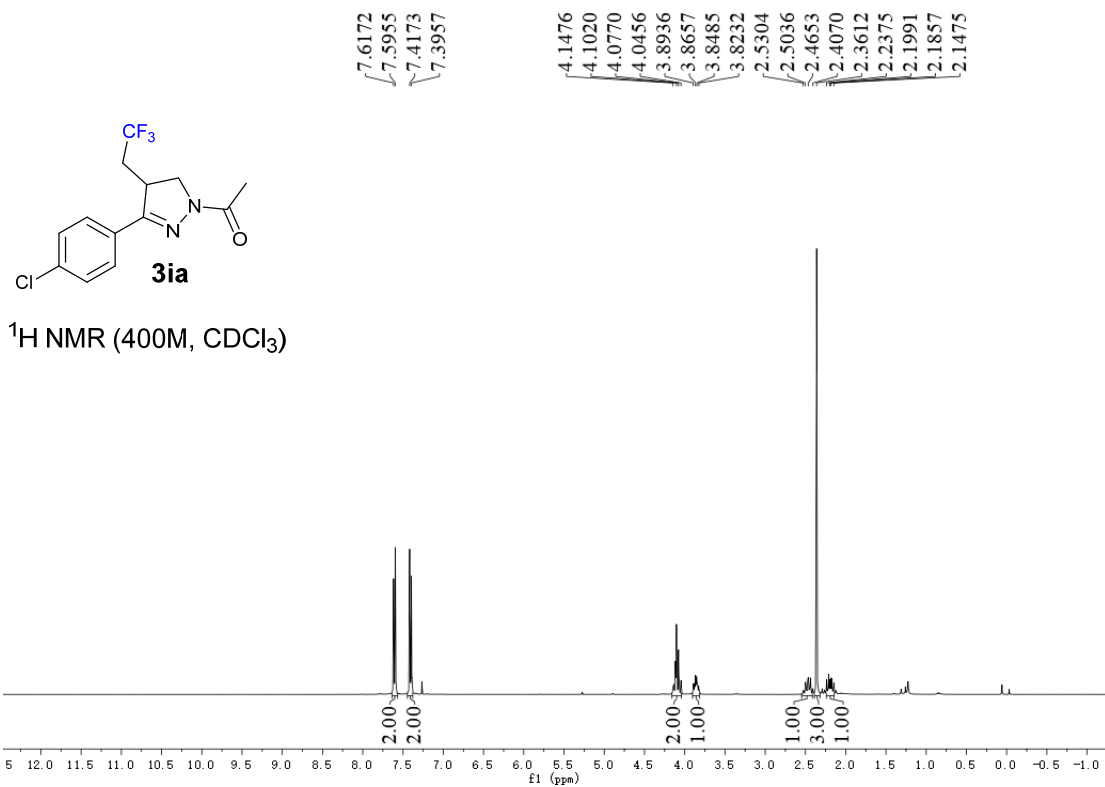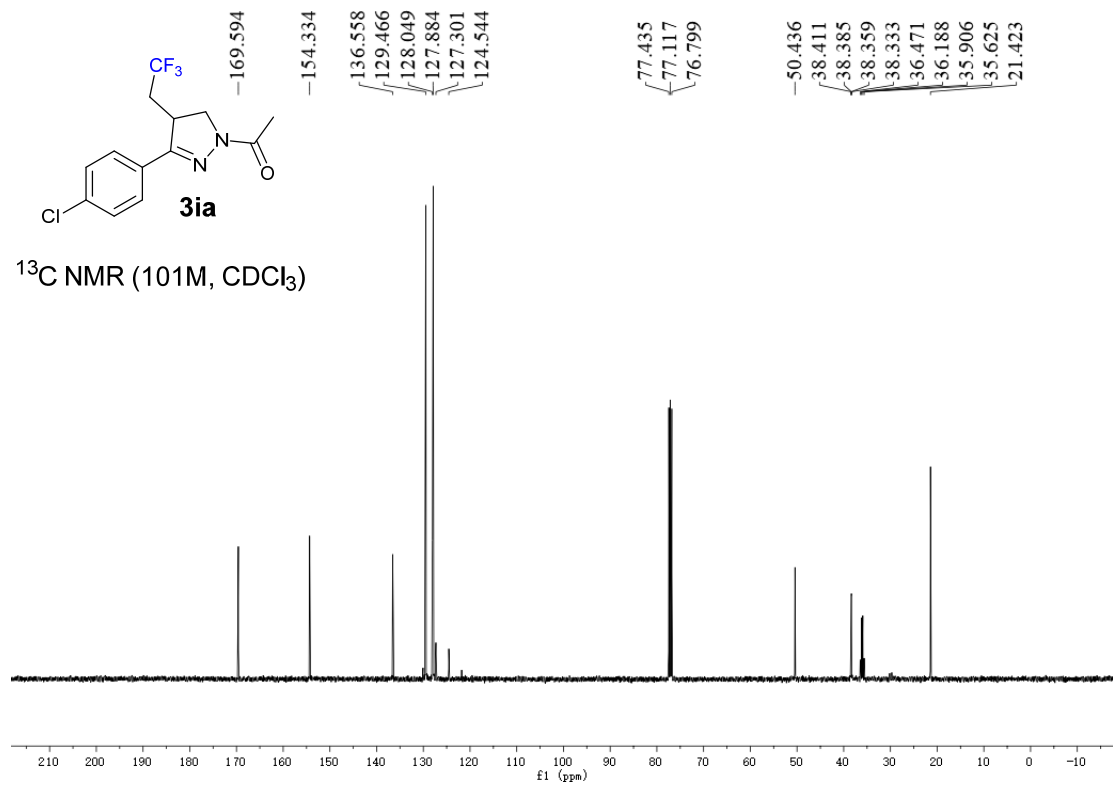

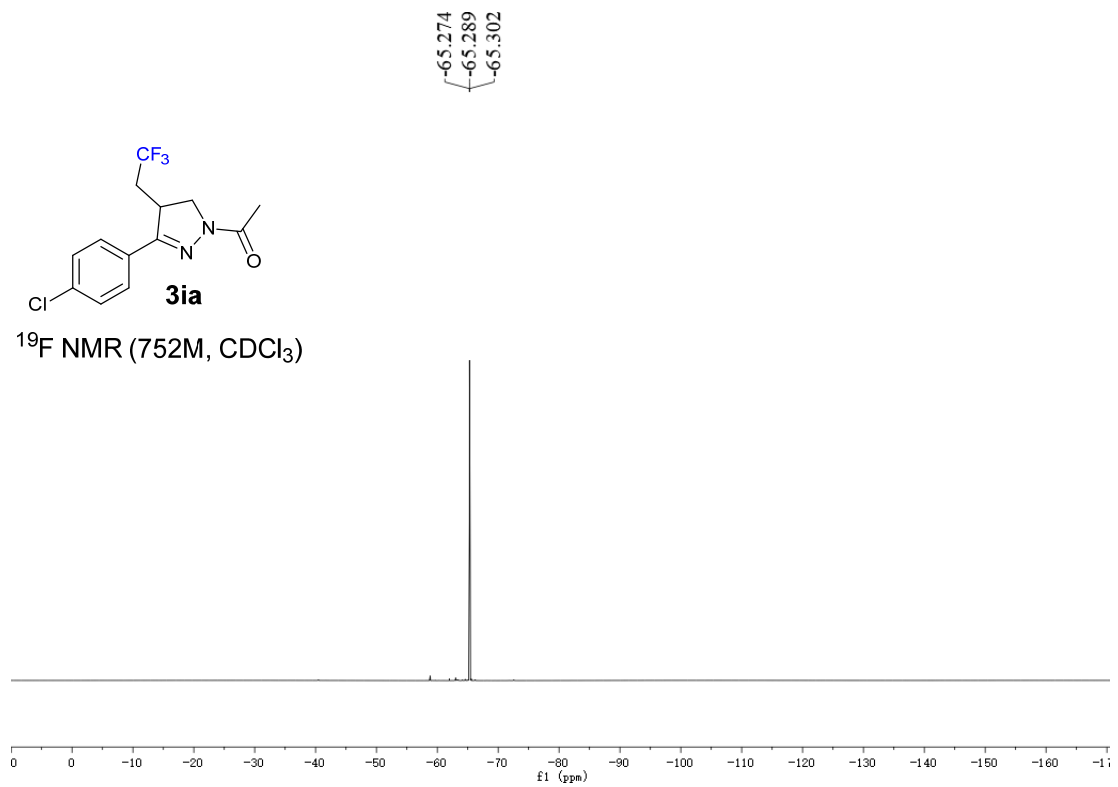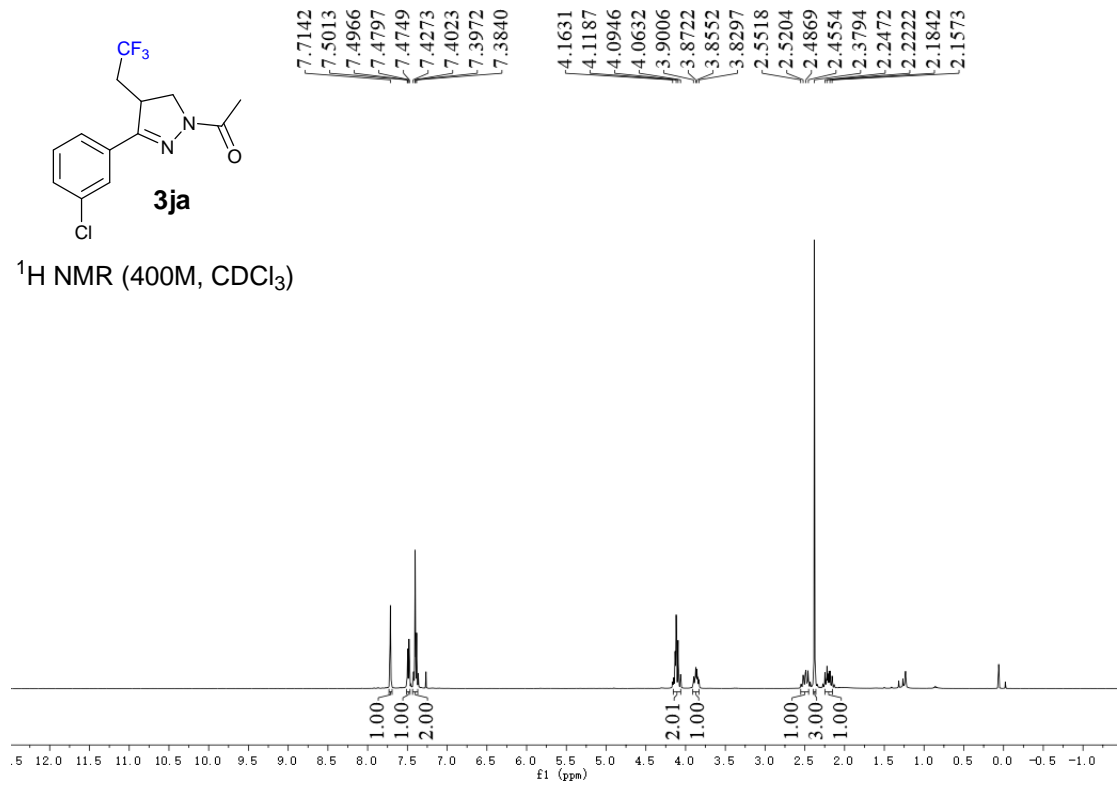

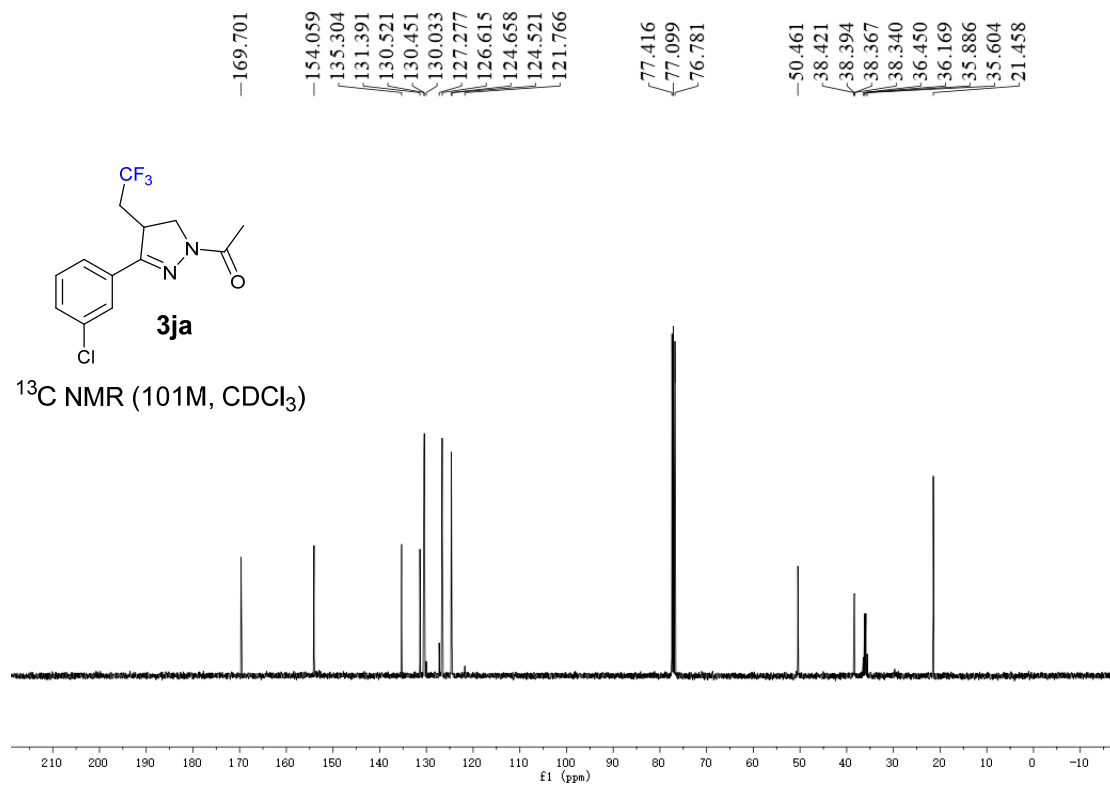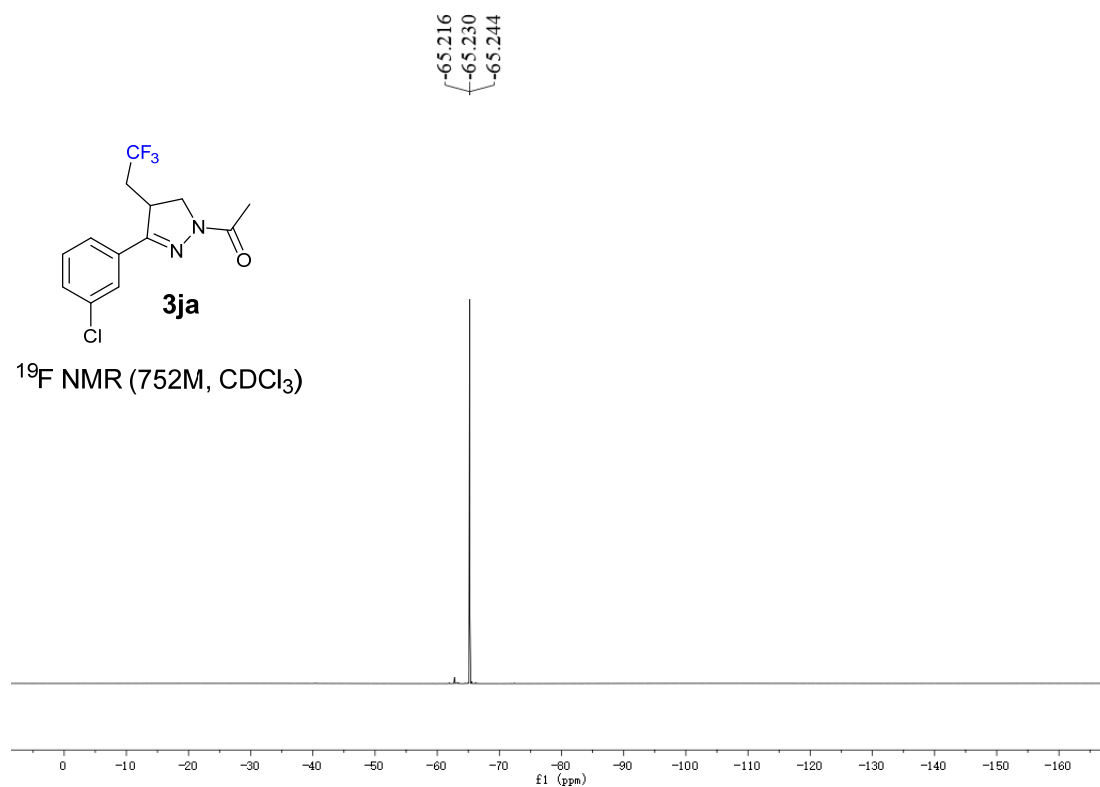

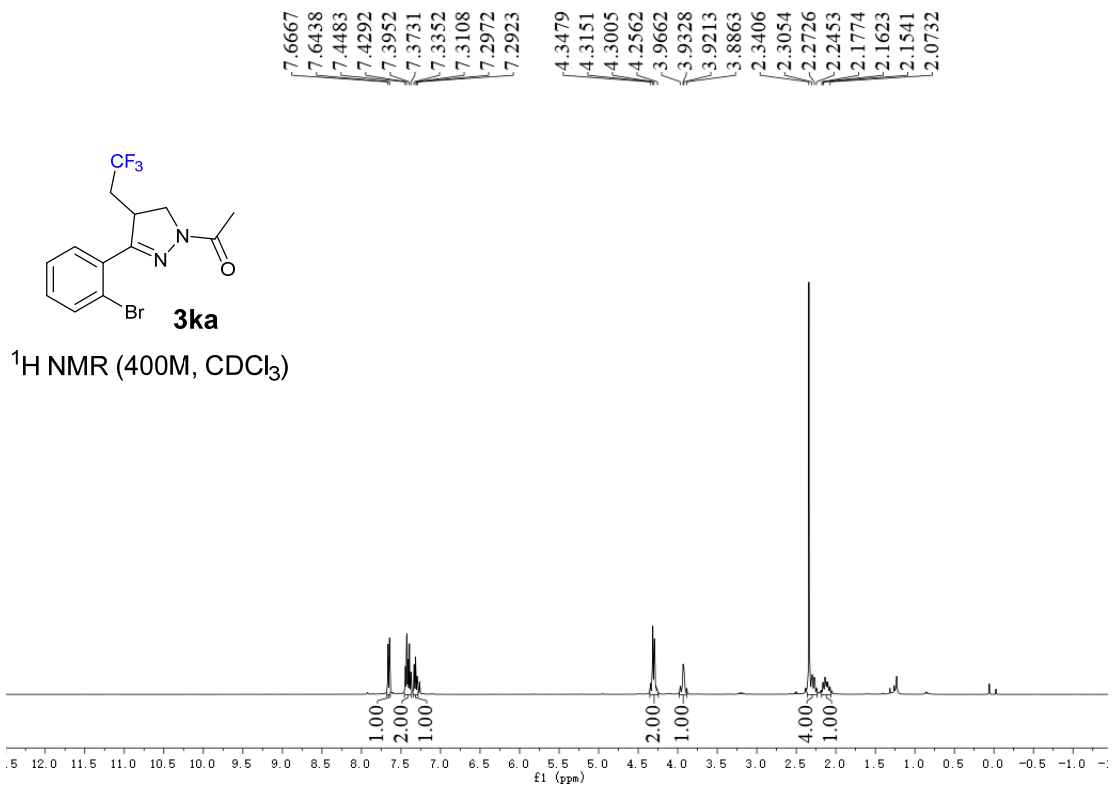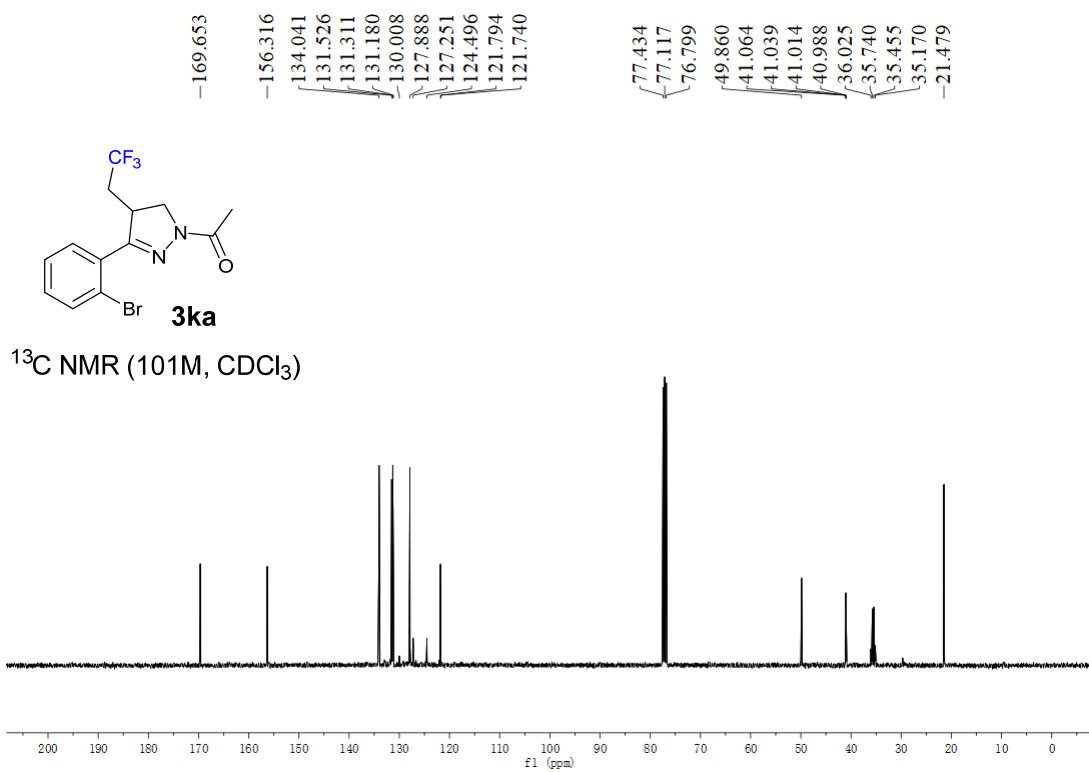

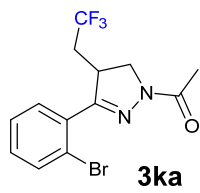

$^{19}\text{F}$  NMR (752M,  $\text{CDCl}_3$ )

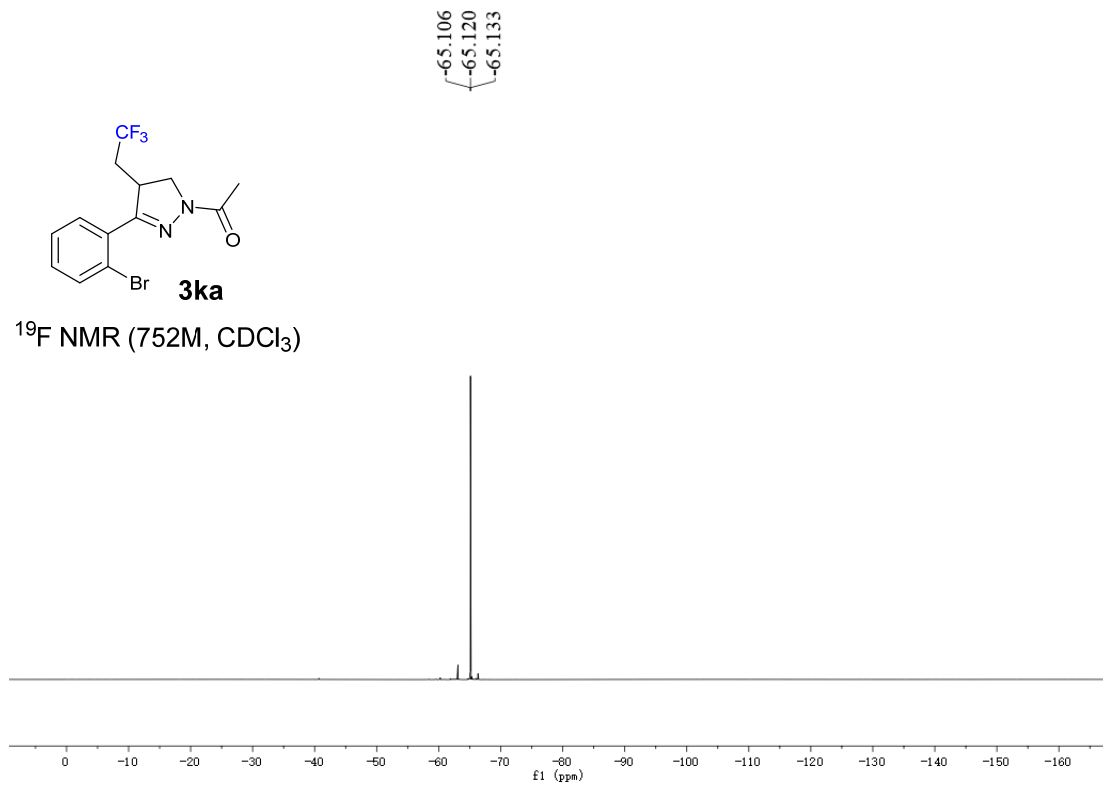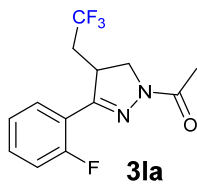

$^1\text{H}$  NMR (400M,  $\text{CDCl}_3$ )

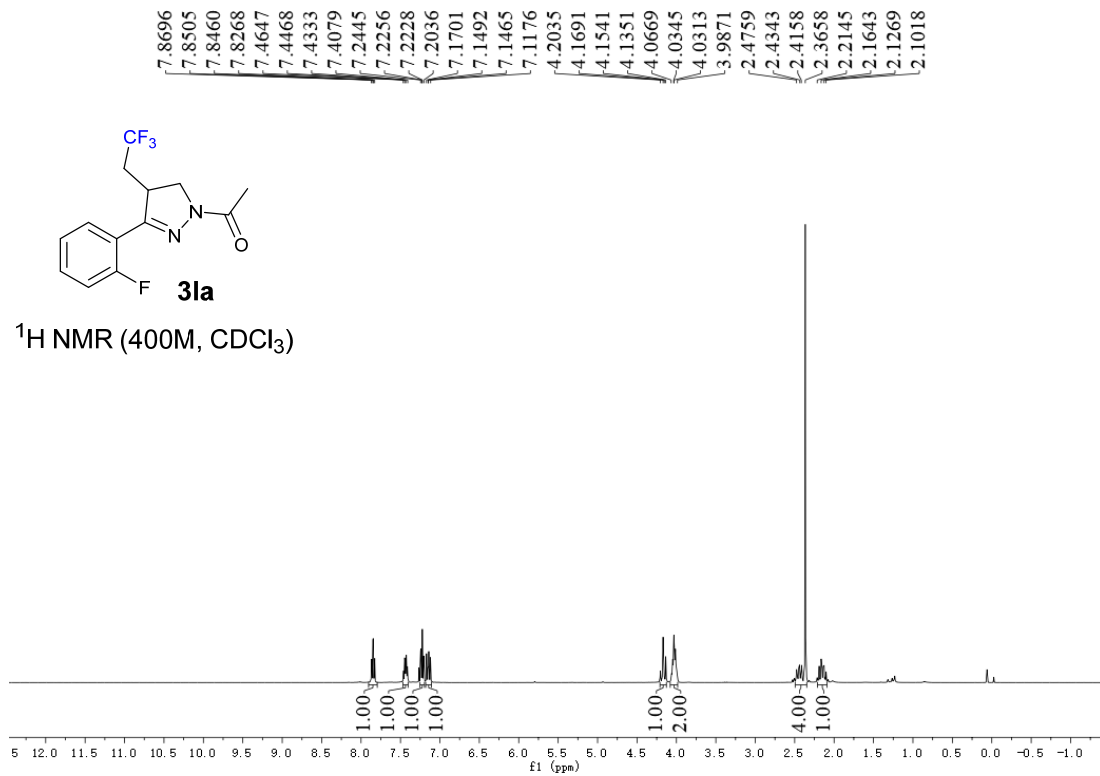

169.523  
 161.648  
 159.149  
 152.703  
 152.677  
 132.428  
 132.341  
 130.105  
 129.573  
 129.541  
 127.351  
 125.009  
 124.976  
 124.597  
 121.838  
 117.891  
 117.778  
 116.815  
 116.594  
 77.421  
 77.103  
 76.785  
 50.039  
 40.780  
 40.752  
 40.716  
 40.687  
 36.537  
 36.245  
 35.961  
 35.691  
 21.418

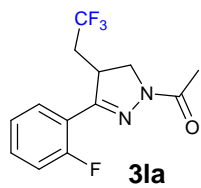

$^{13}\text{C}$  NMR (101M,  $\text{CDCl}_3$ )

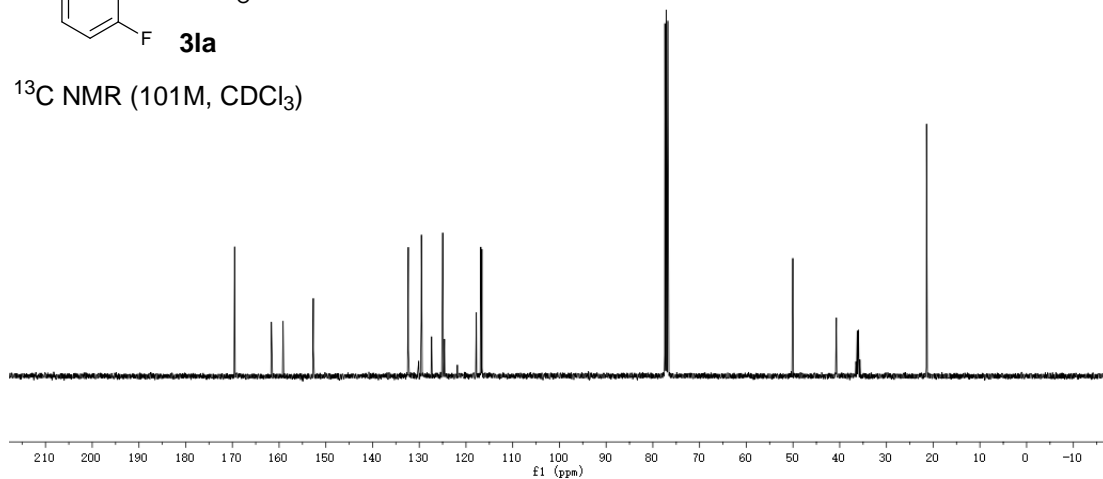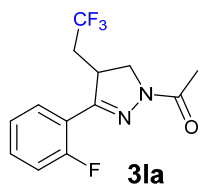

$^{19}\text{F}$  NMR (752M,  $\text{CDCl}_3$ )

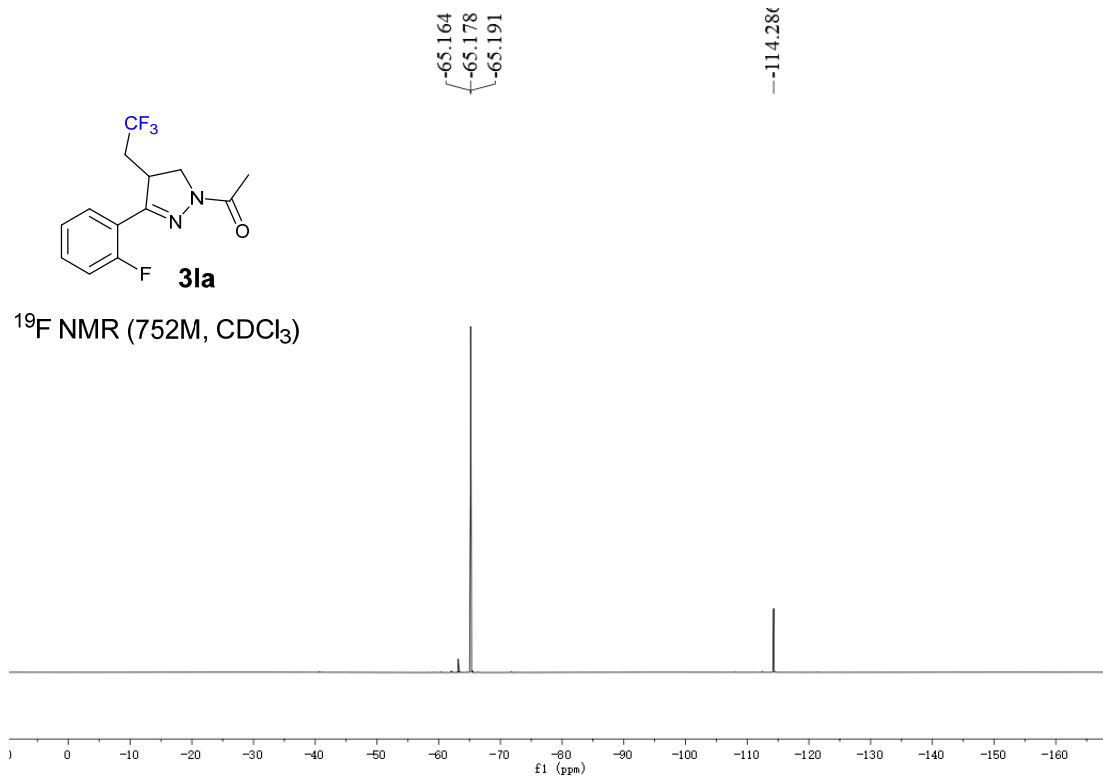

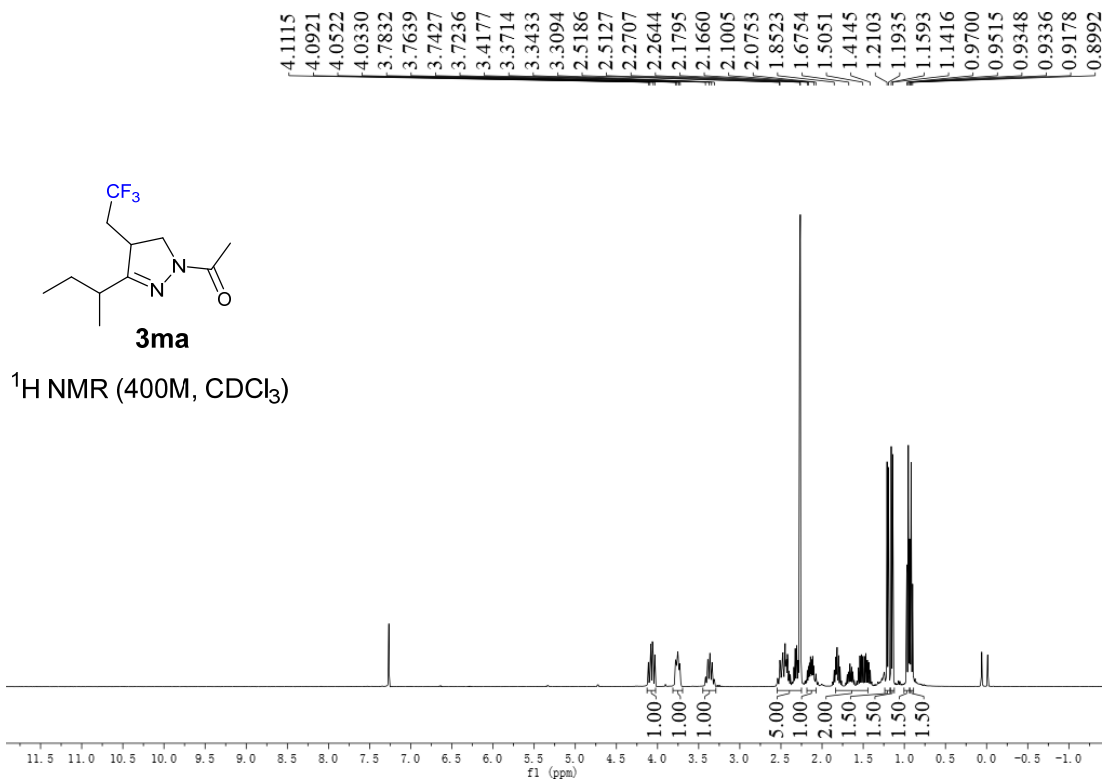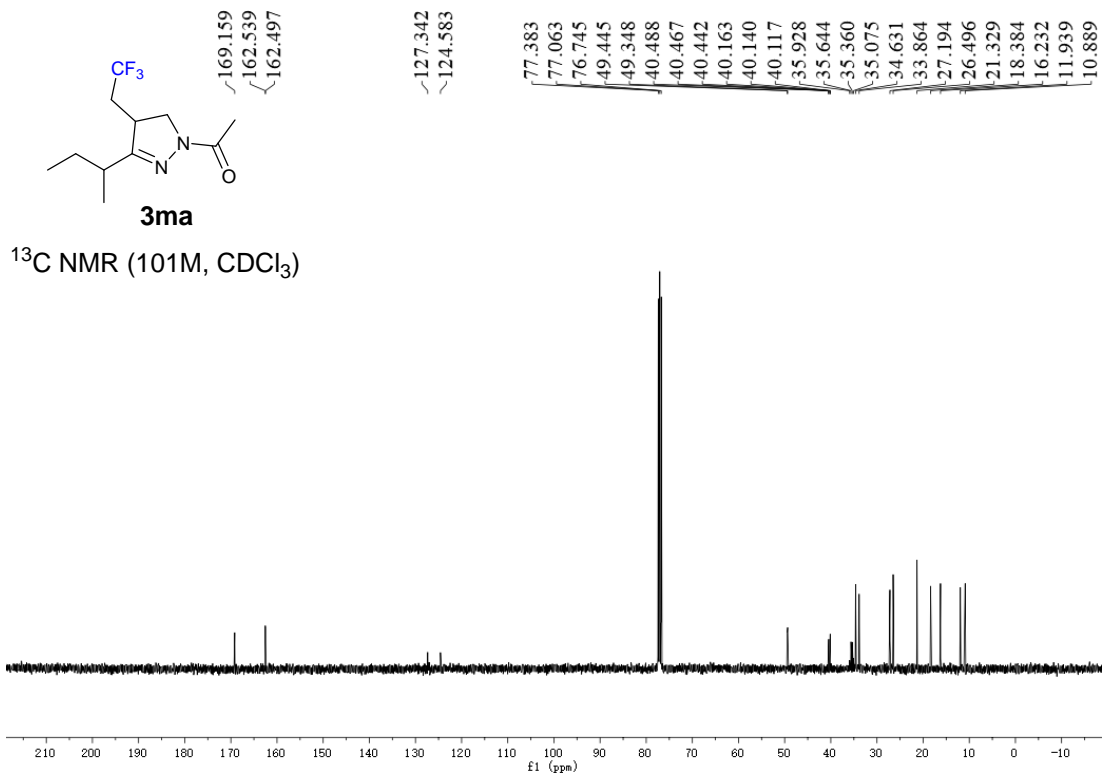

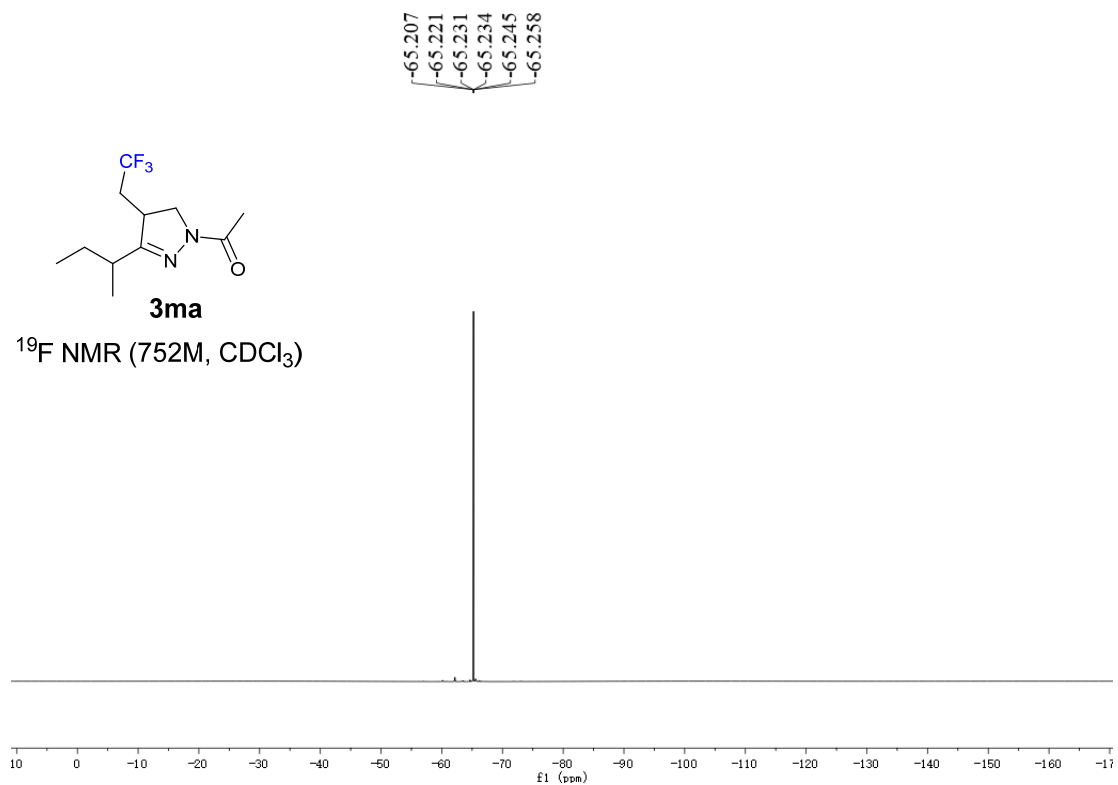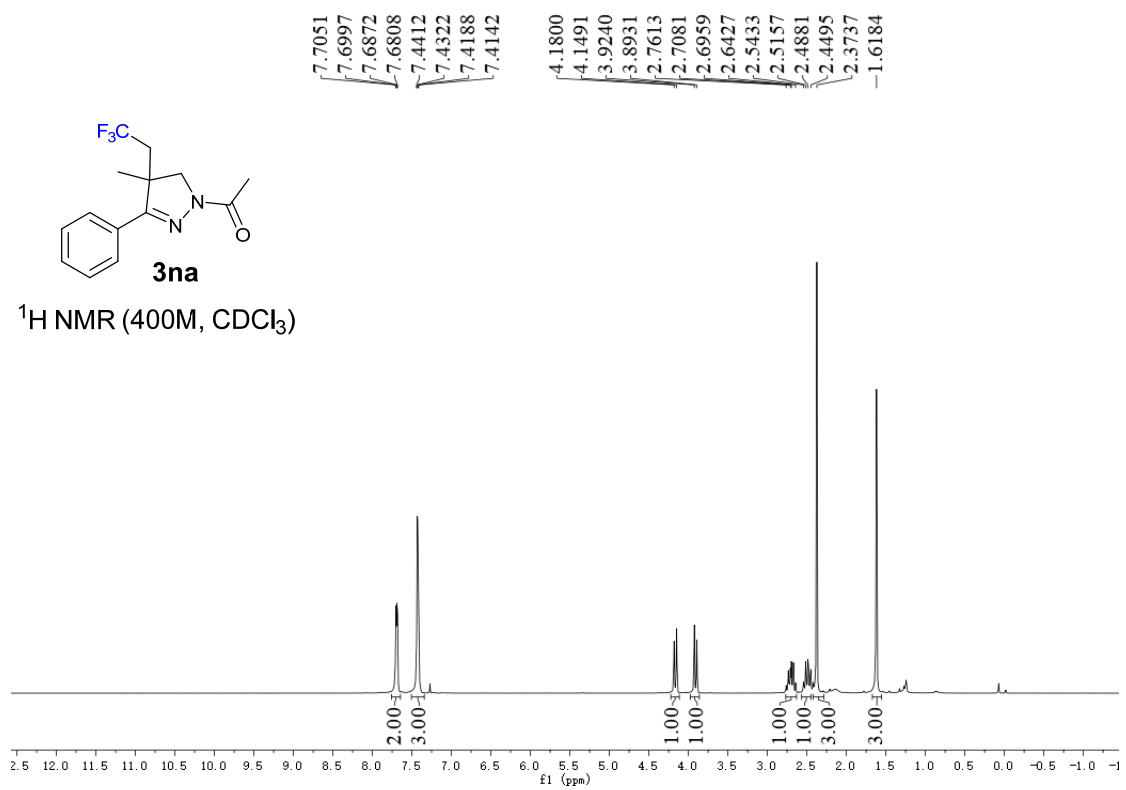



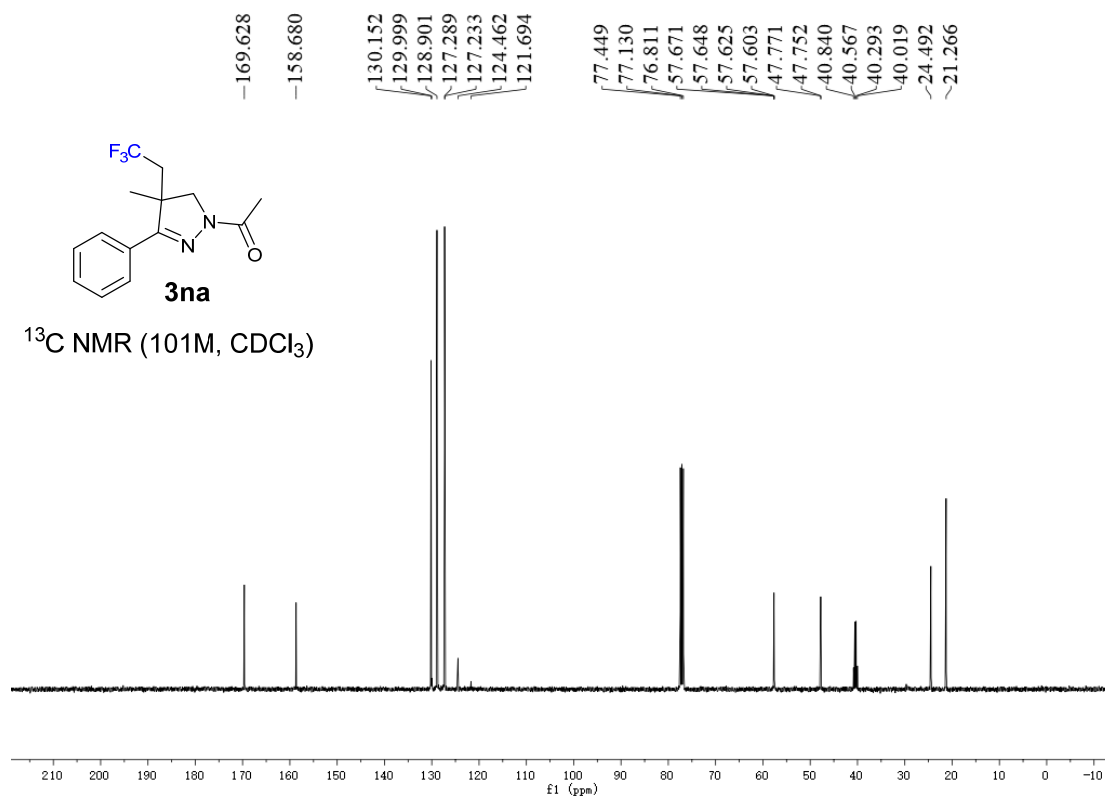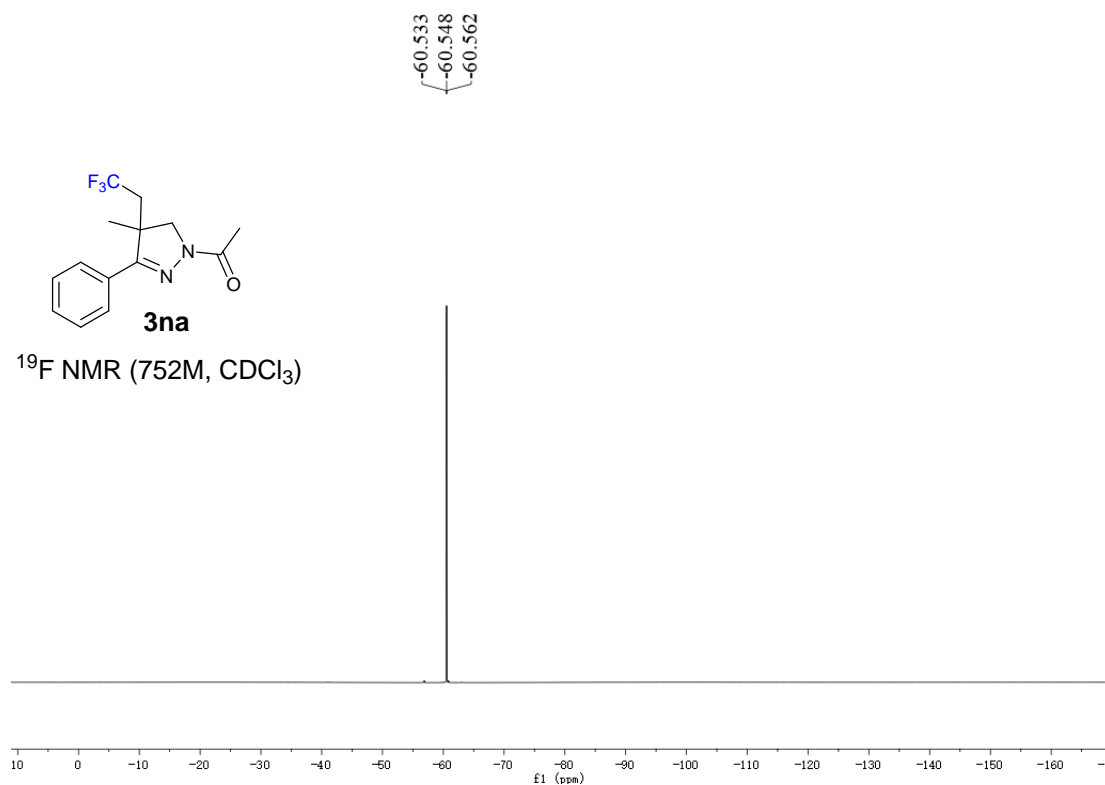

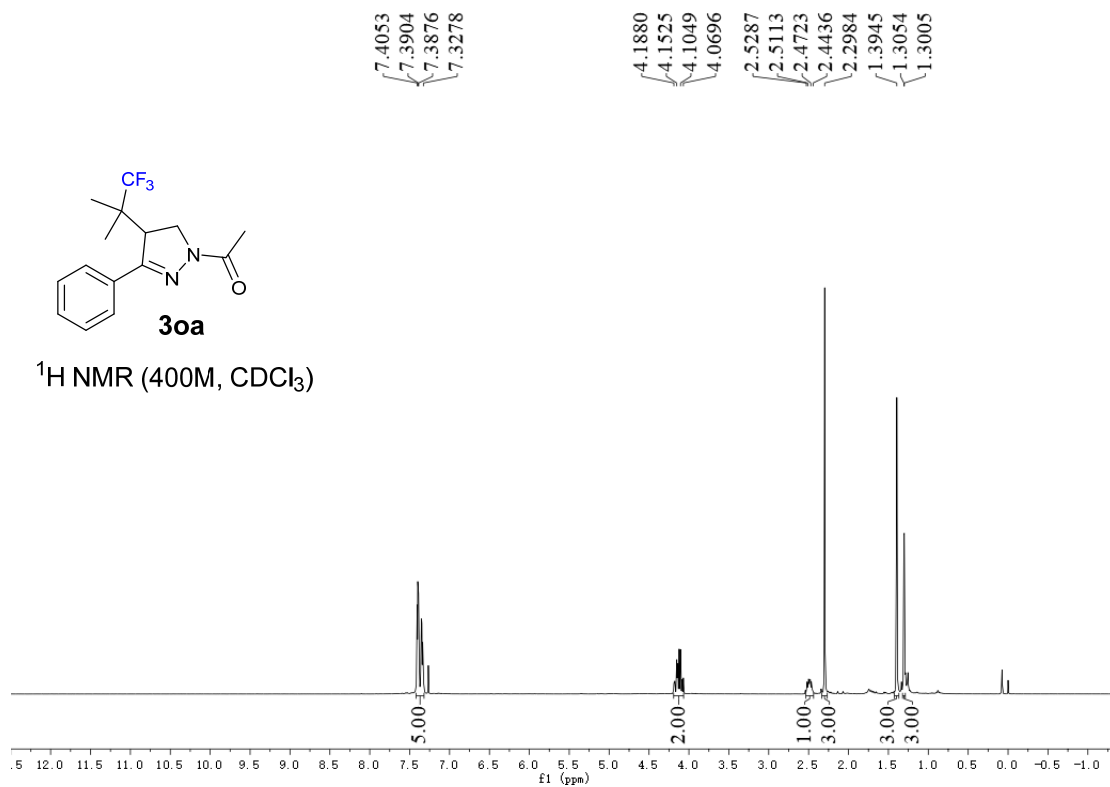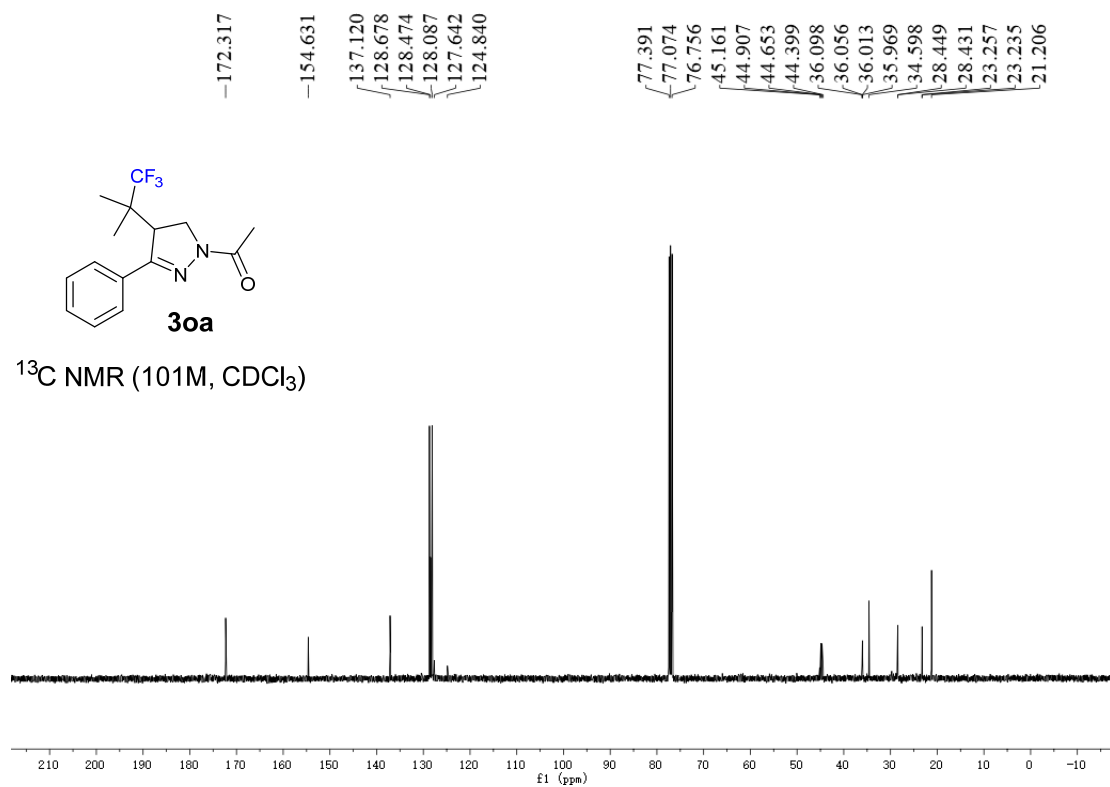

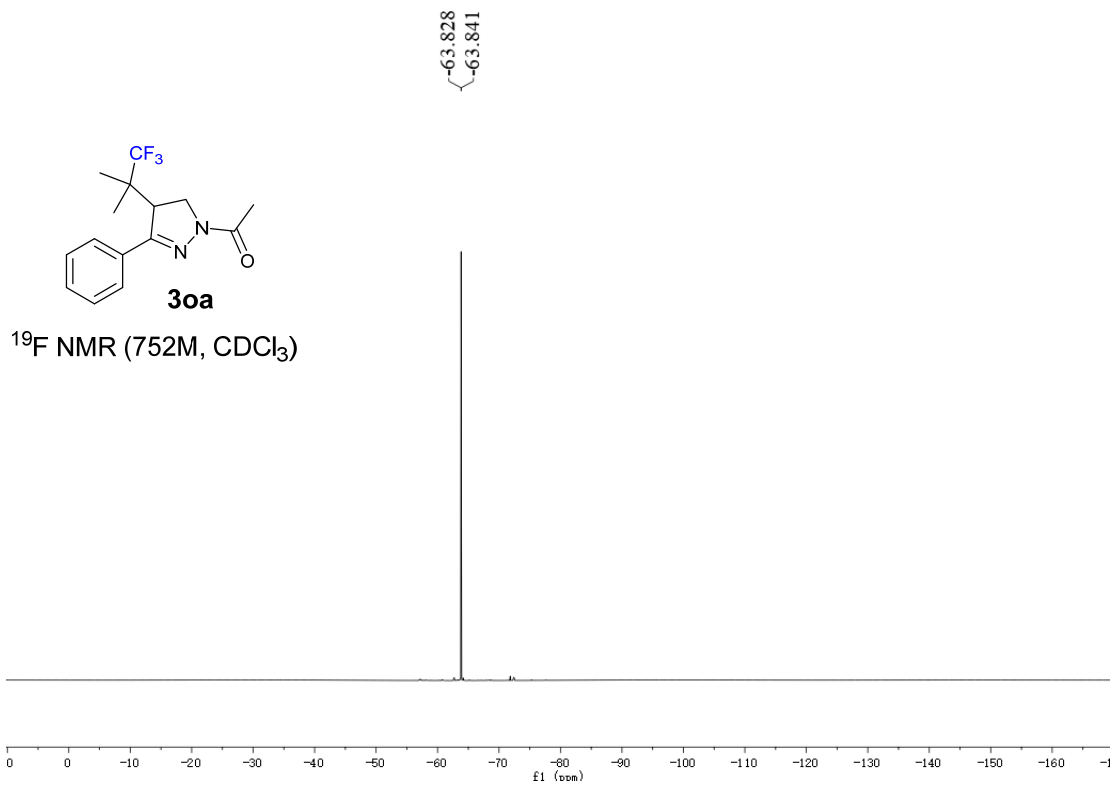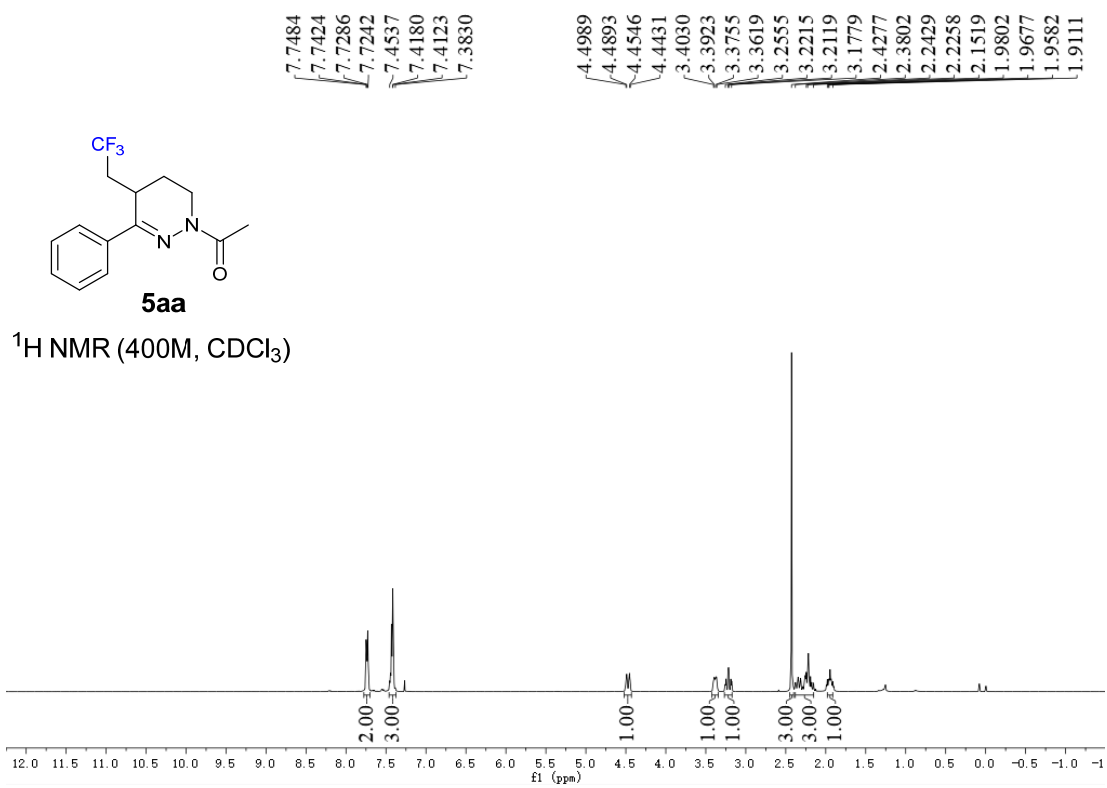

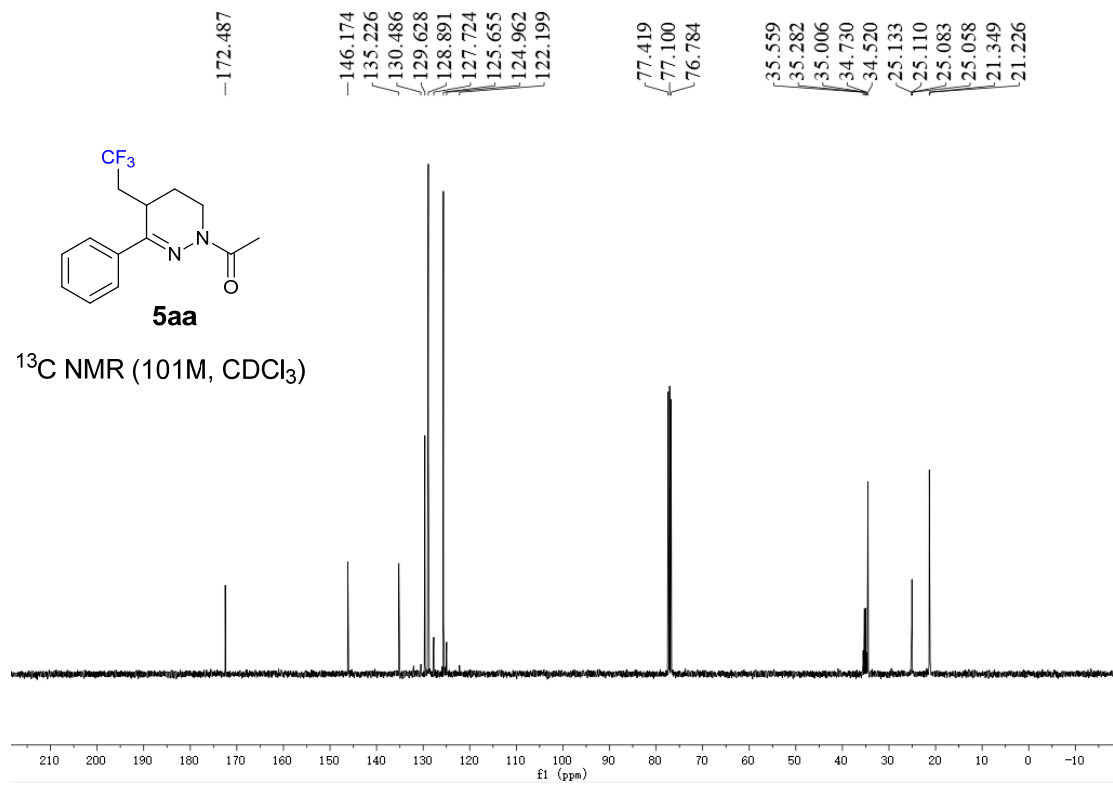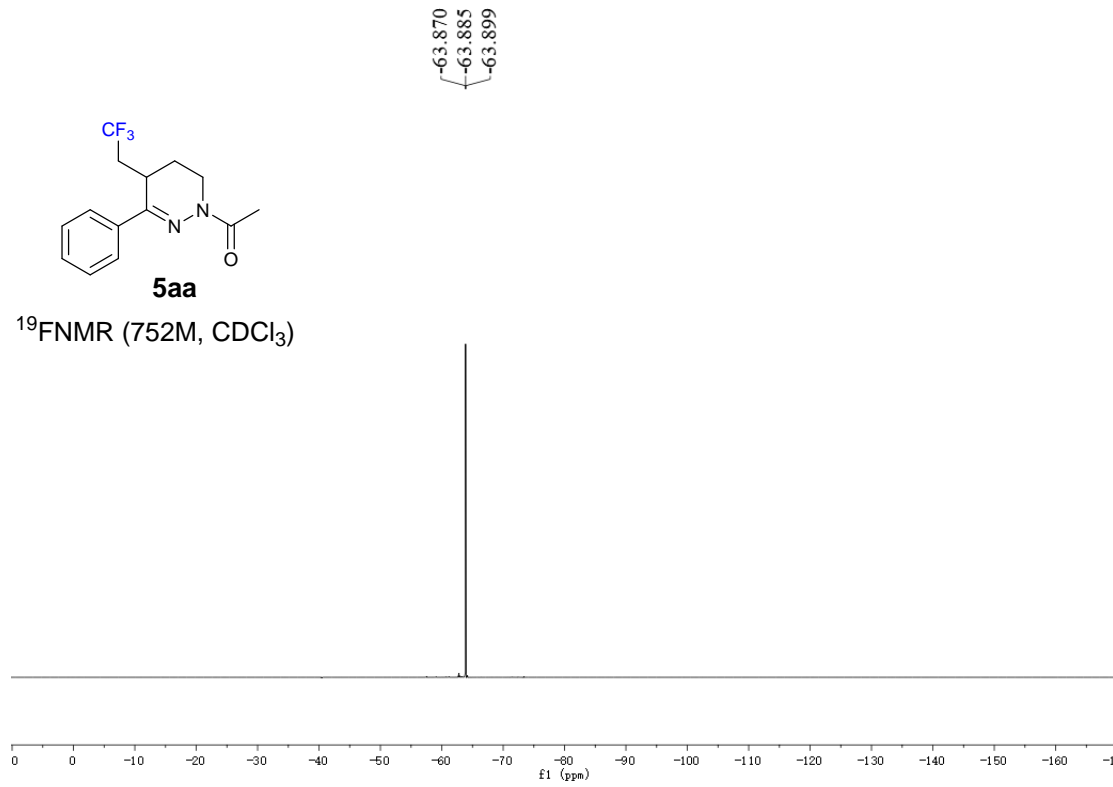

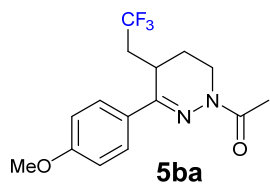

$^1\text{H NMR}$  (400M,  $\text{CDCl}_3$ )

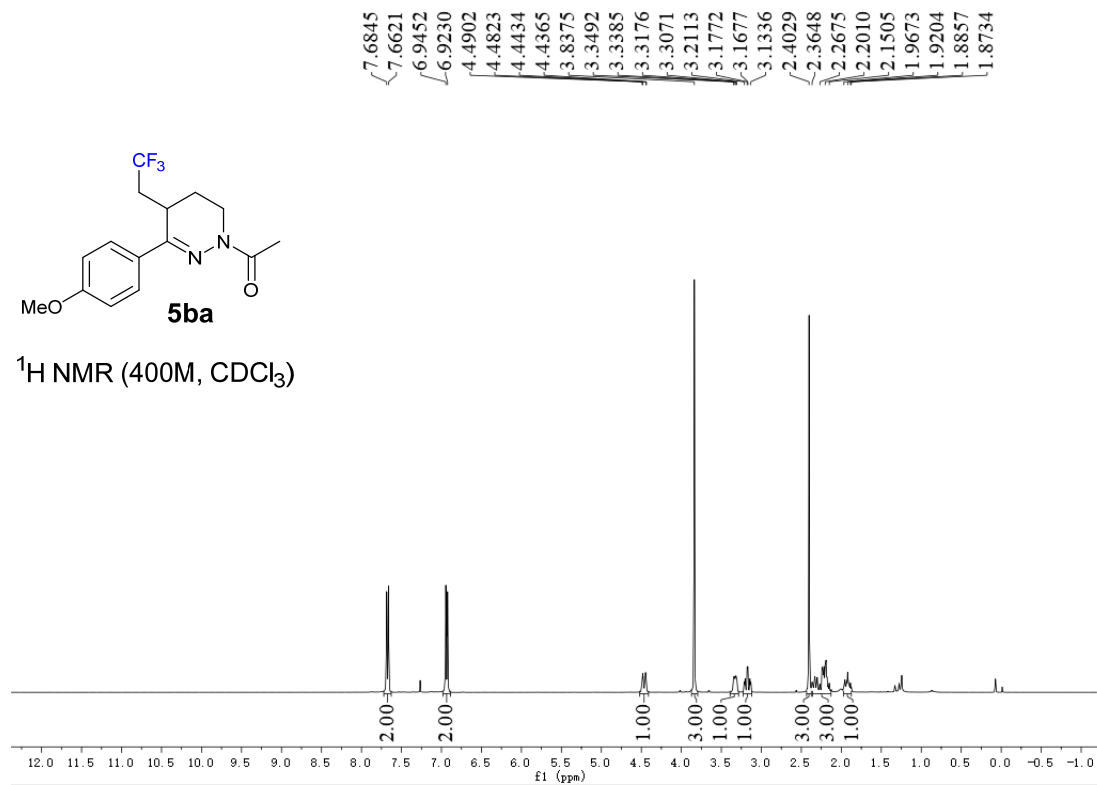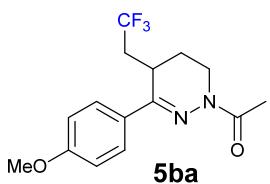

$^{13}\text{C NMR}$  (101M,  $\text{CDCl}_3$ )

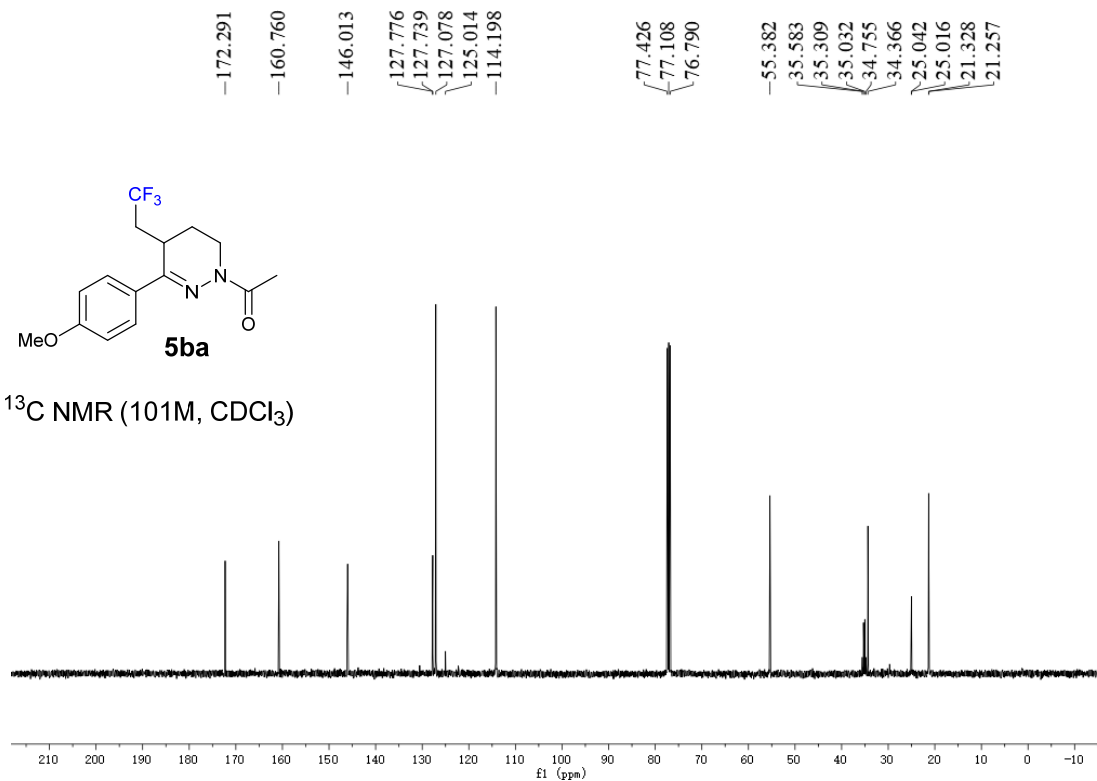

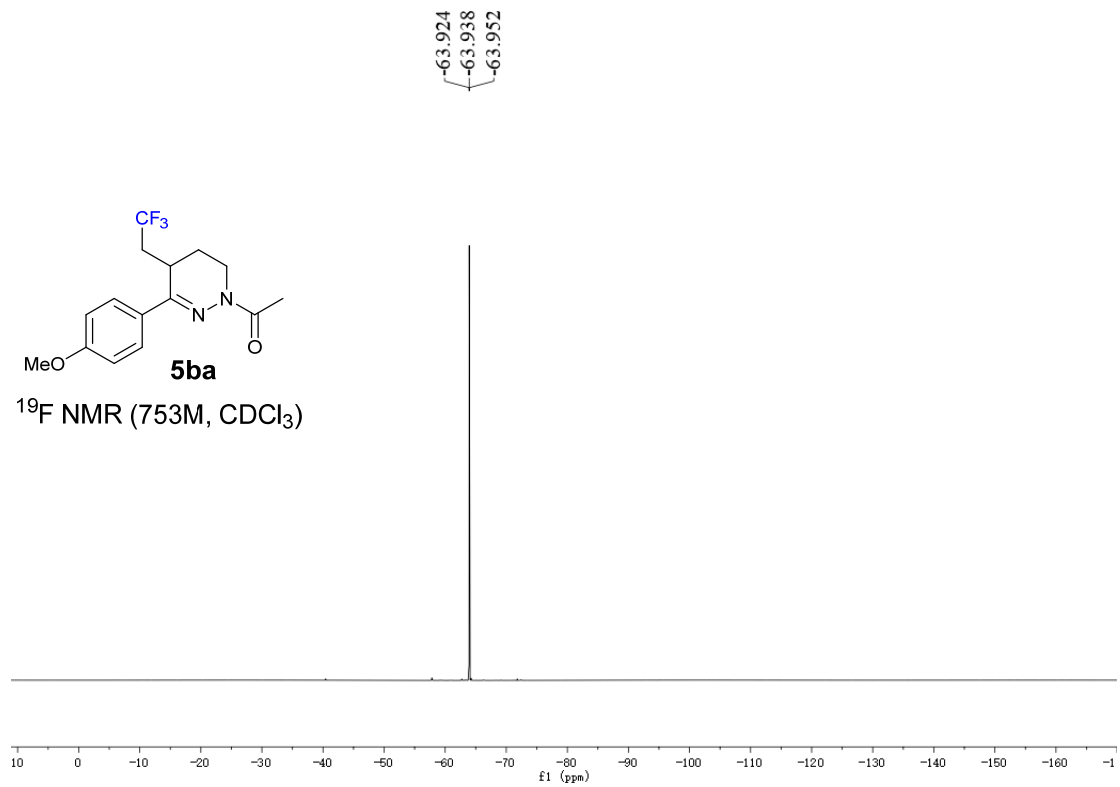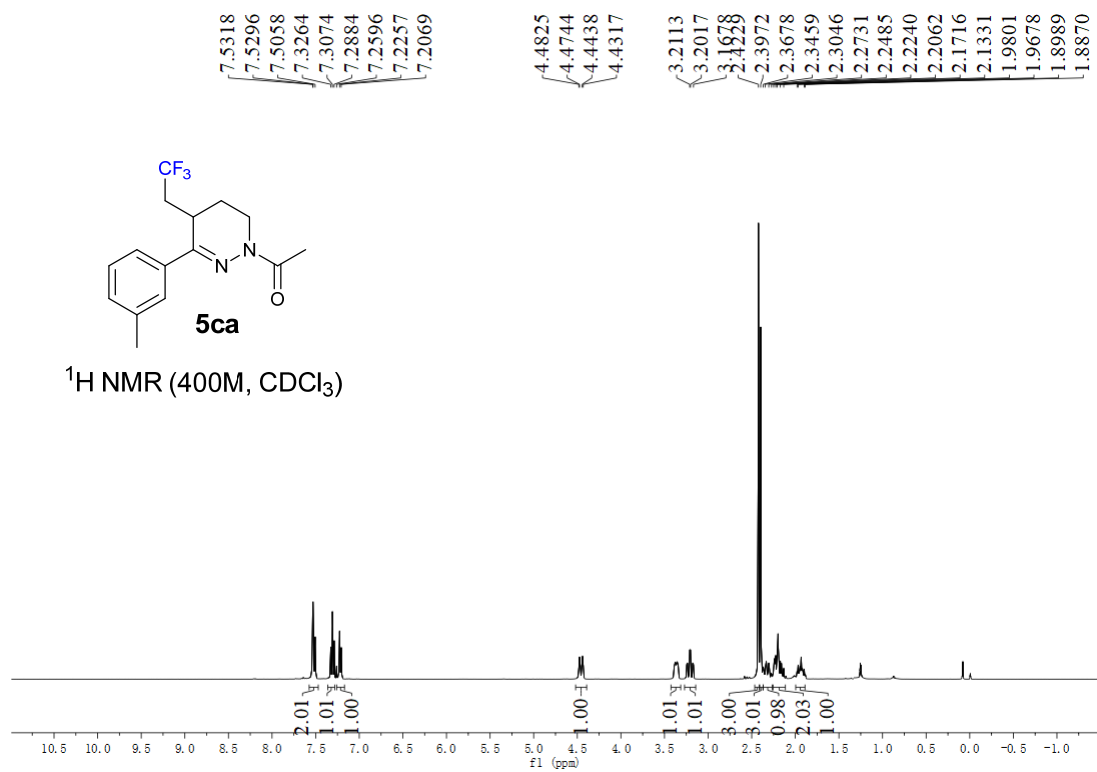

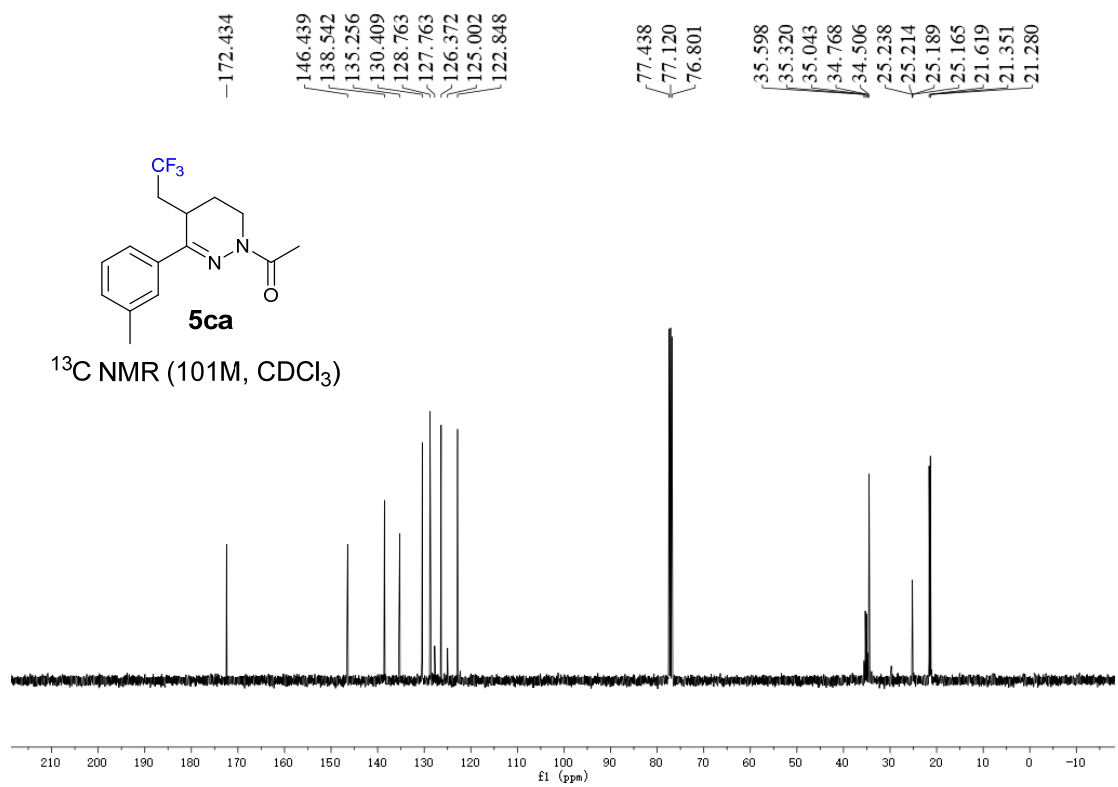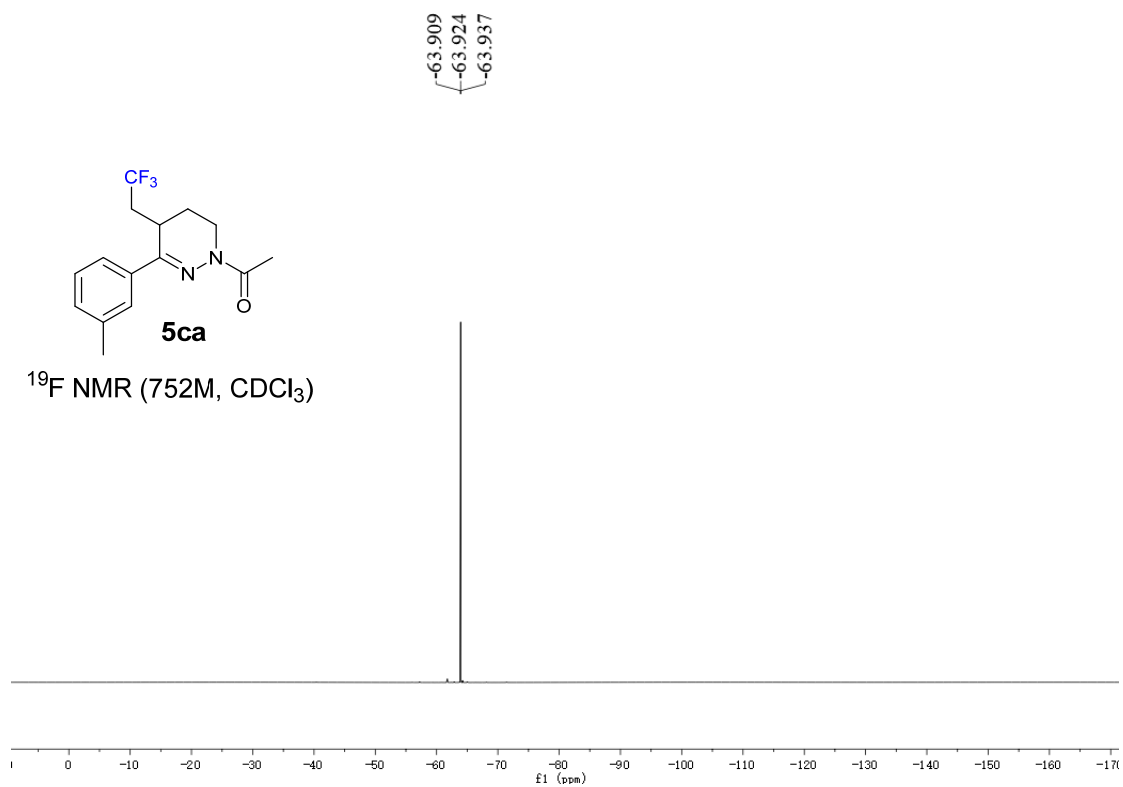

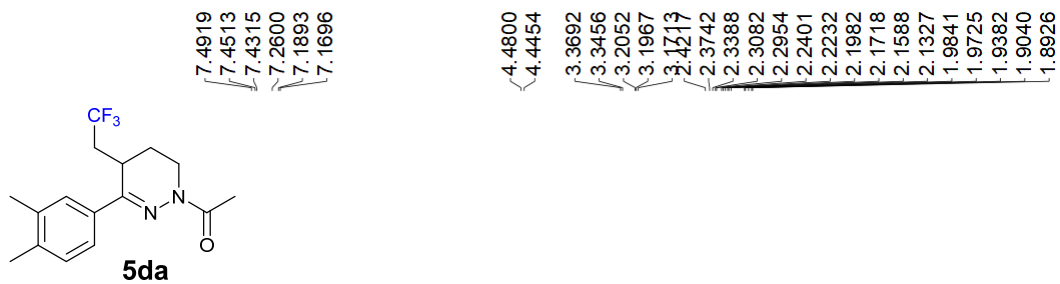

<sup>1</sup>H NMR (400M, CDCl<sub>3</sub>)

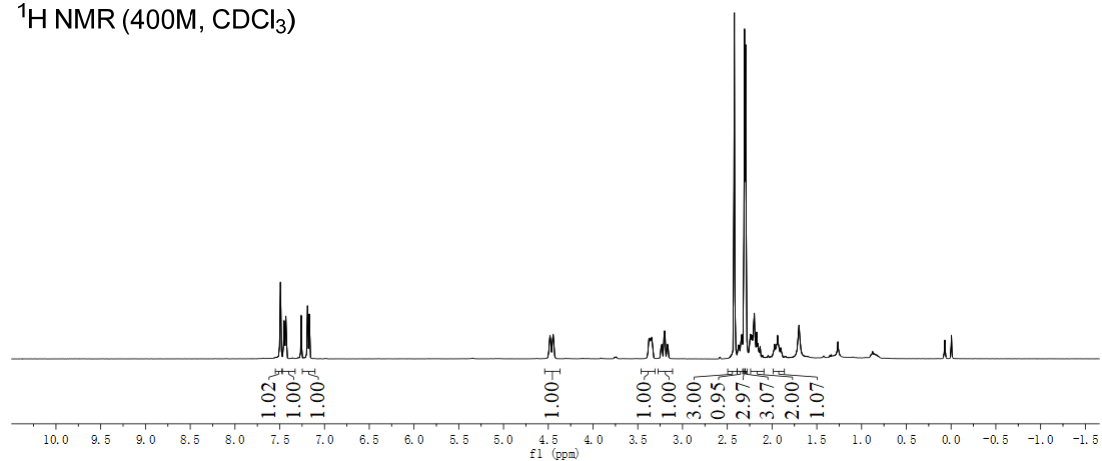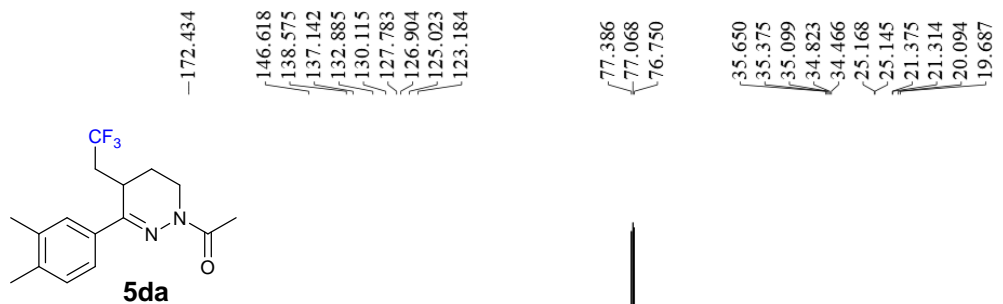

<sup>13</sup>C NMR (101M, CDCl<sub>3</sub>)

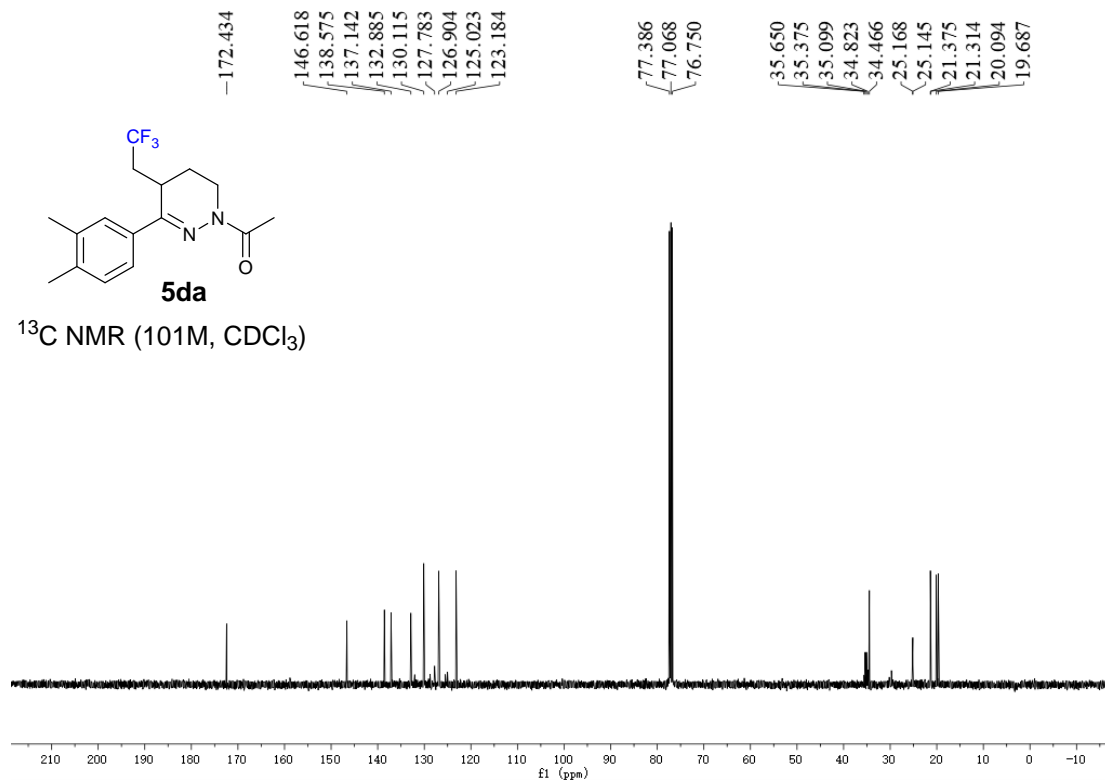



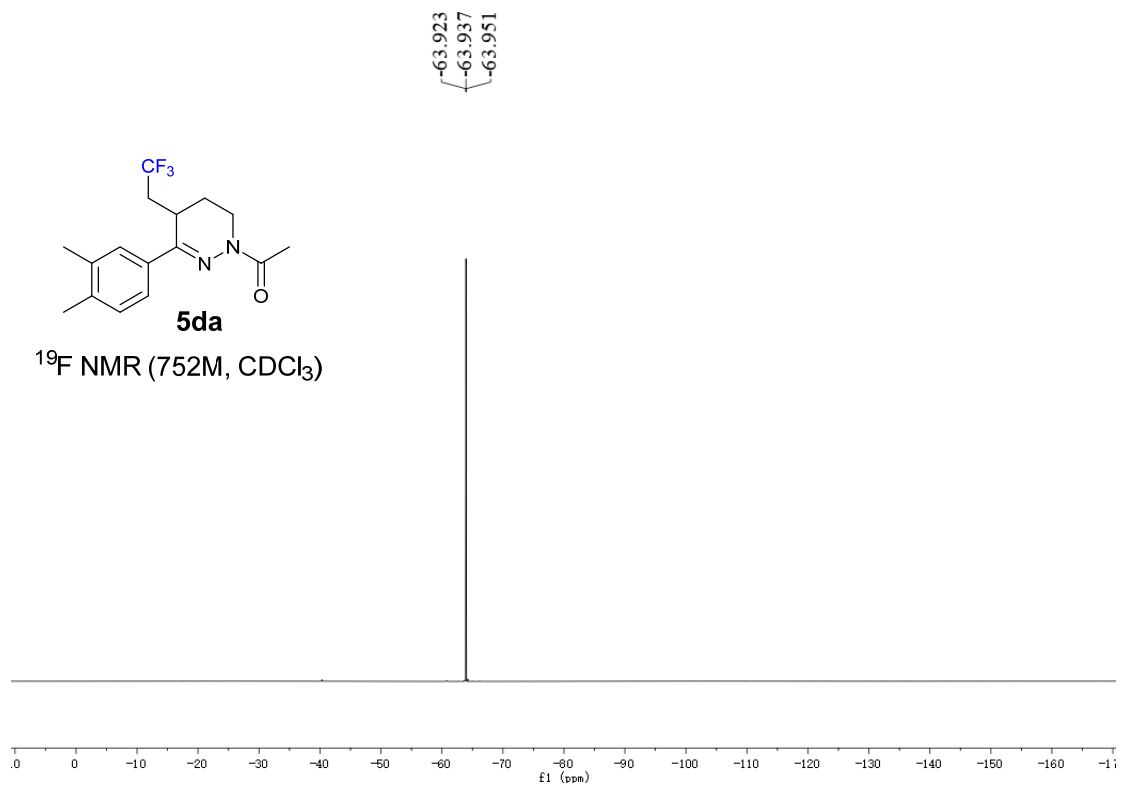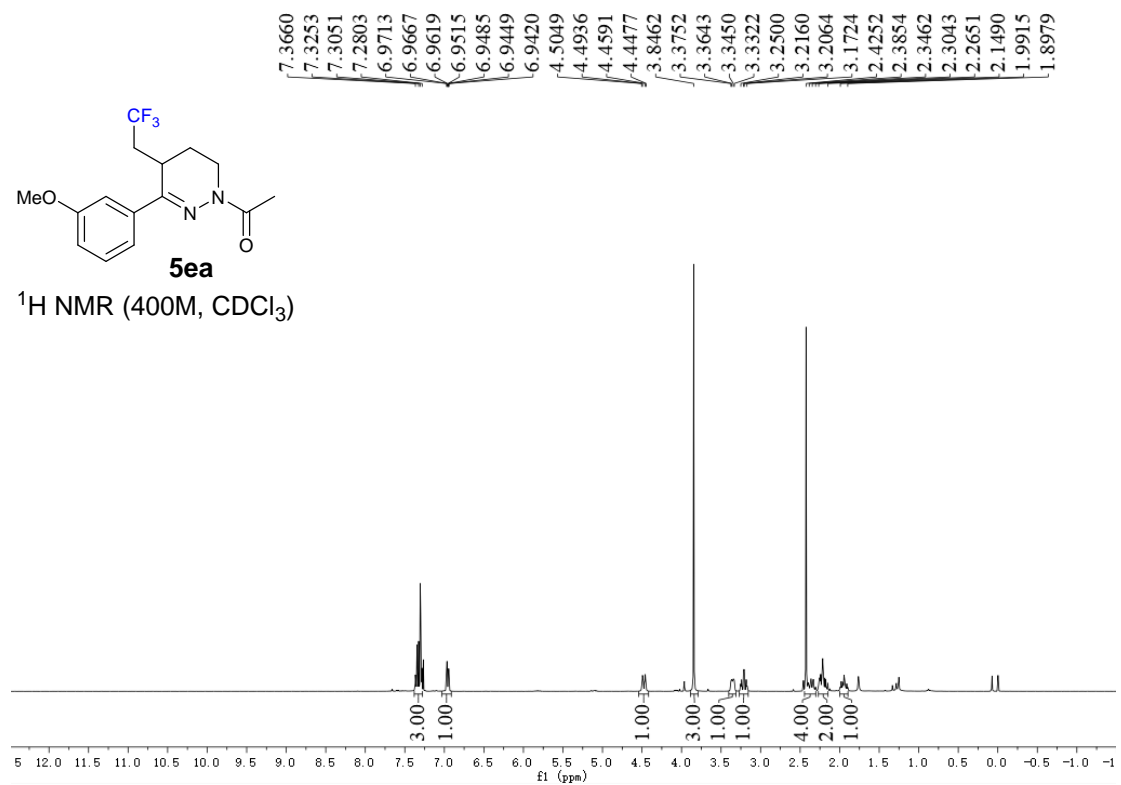

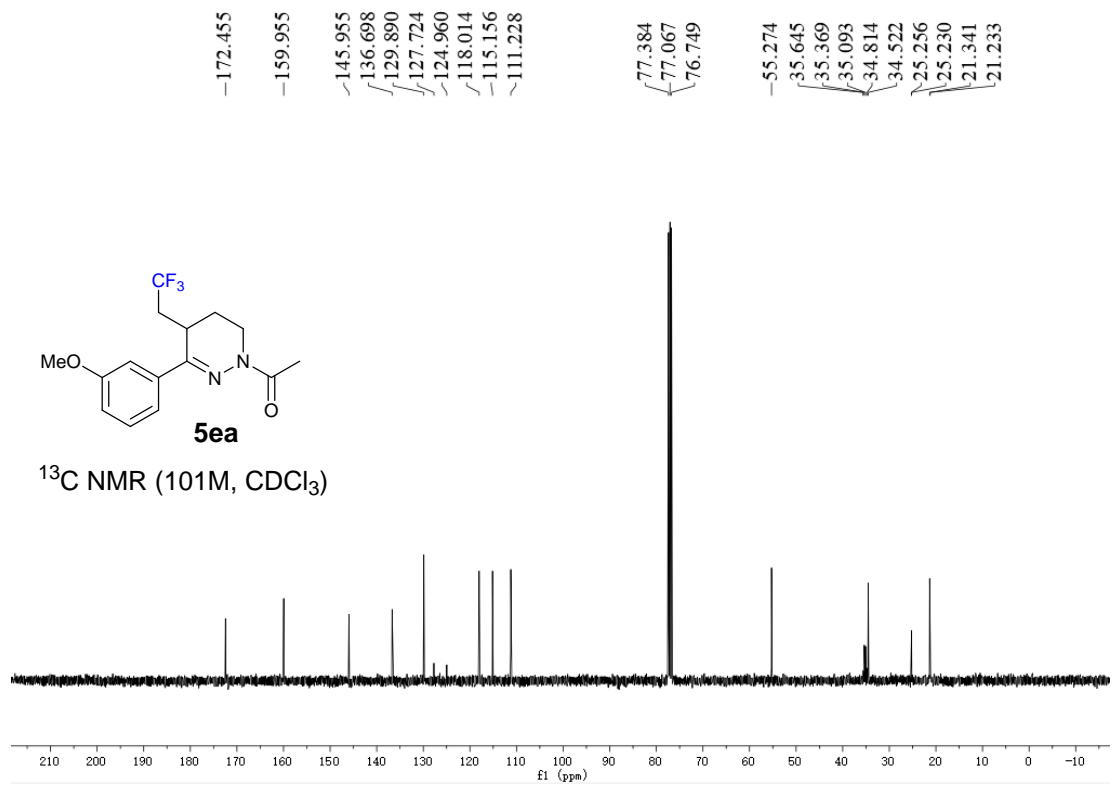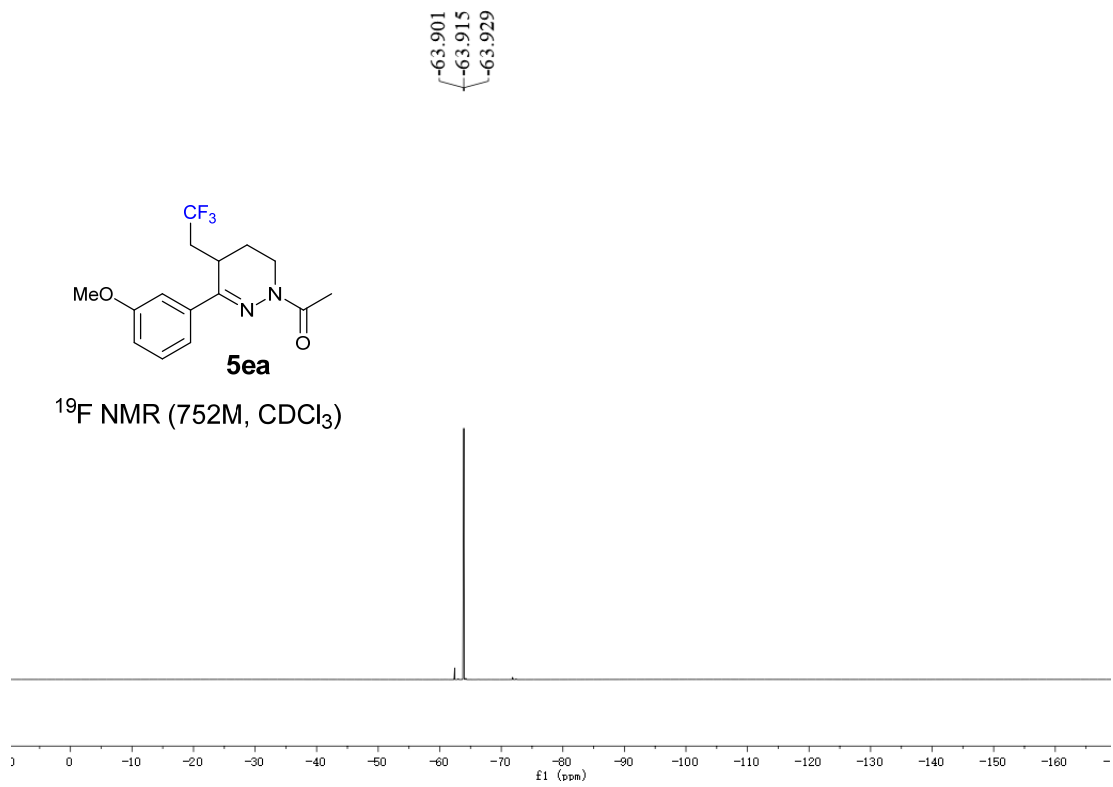

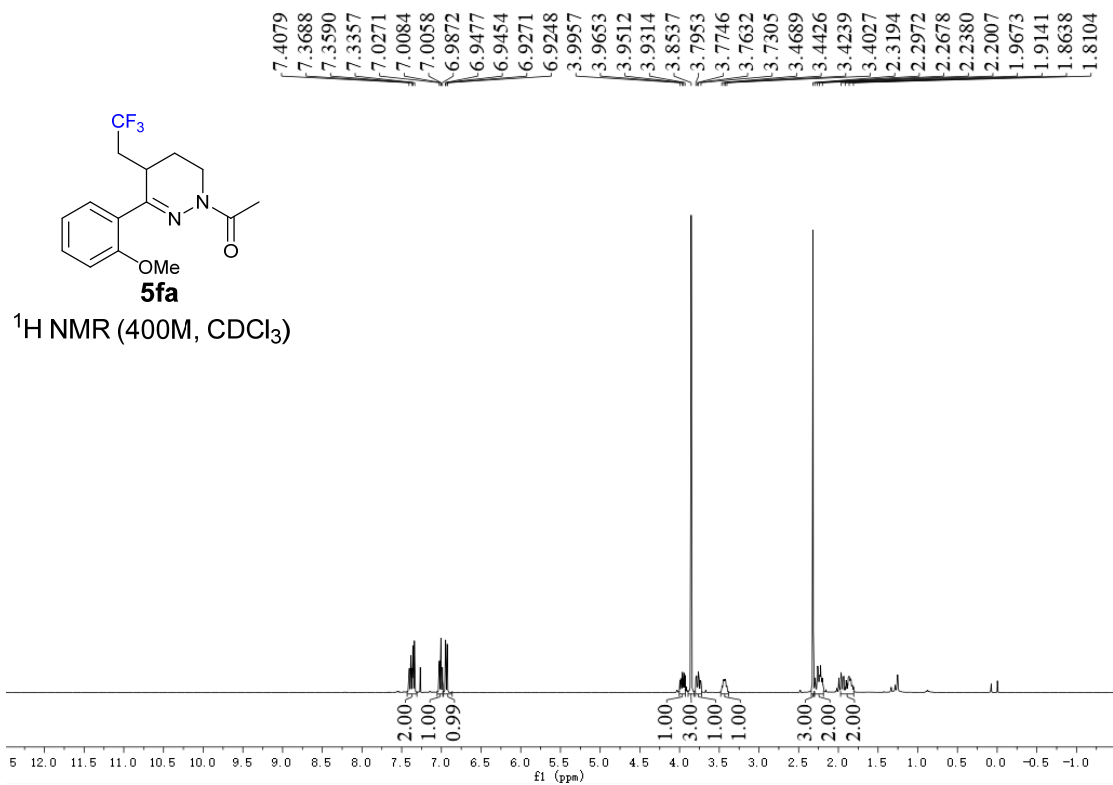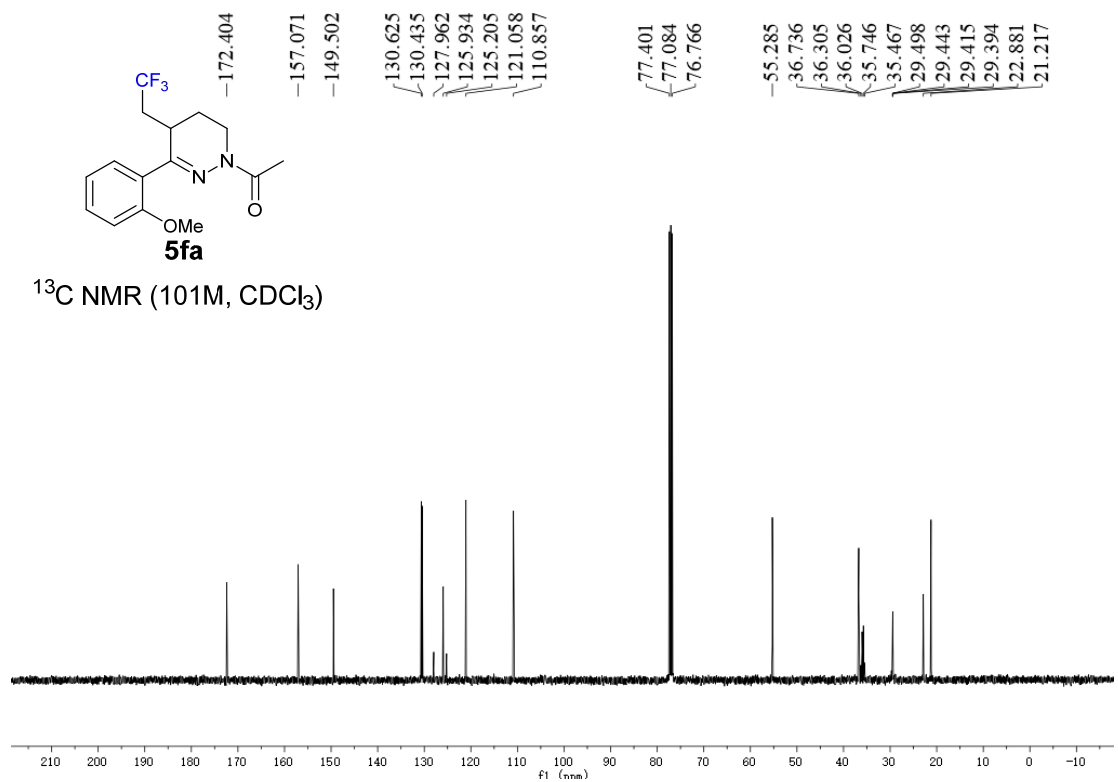

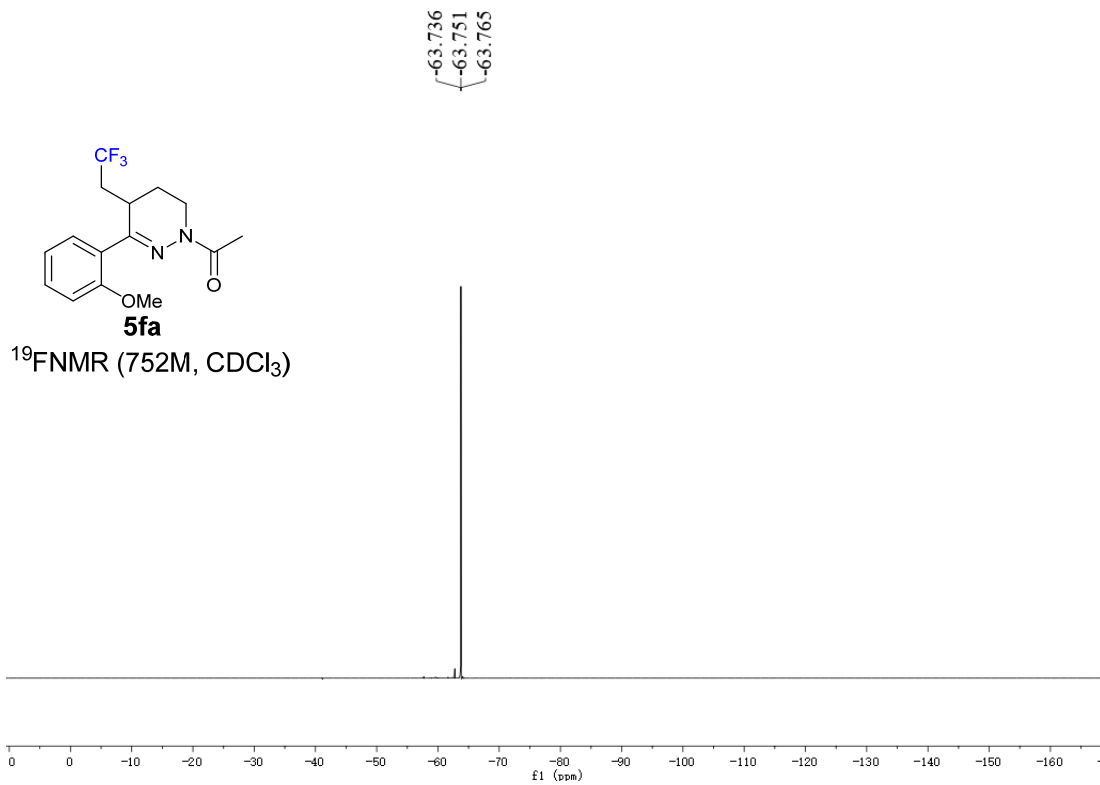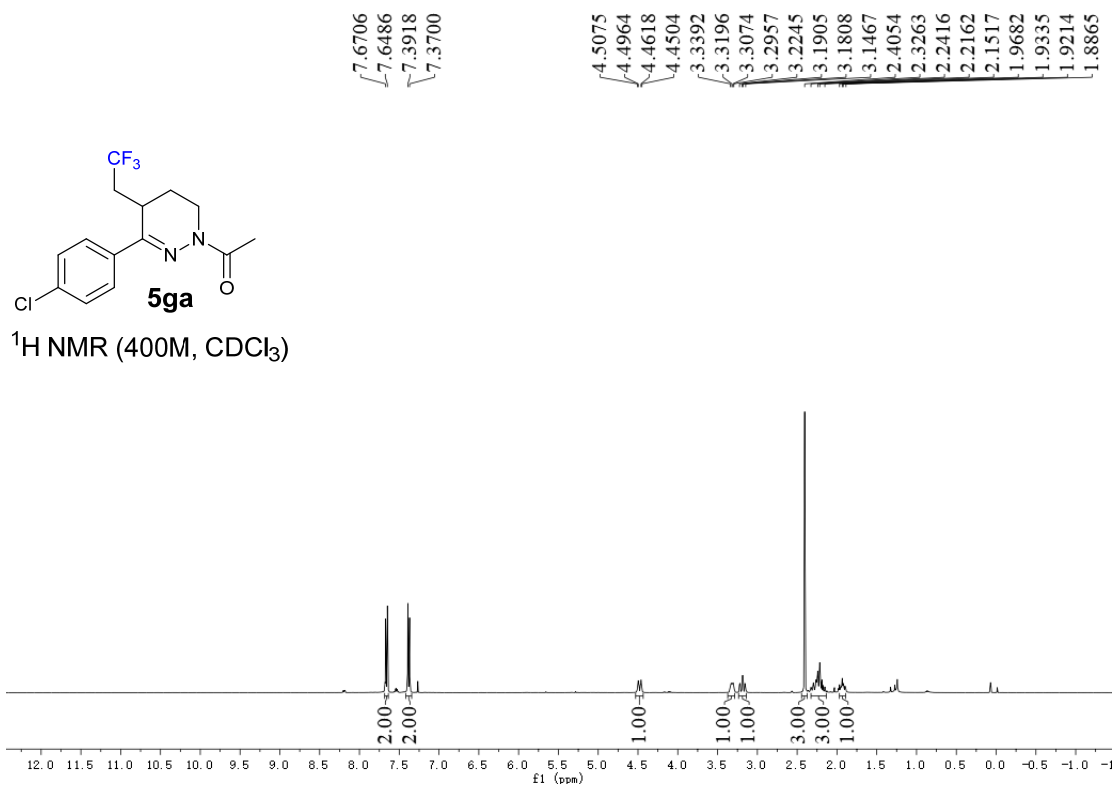

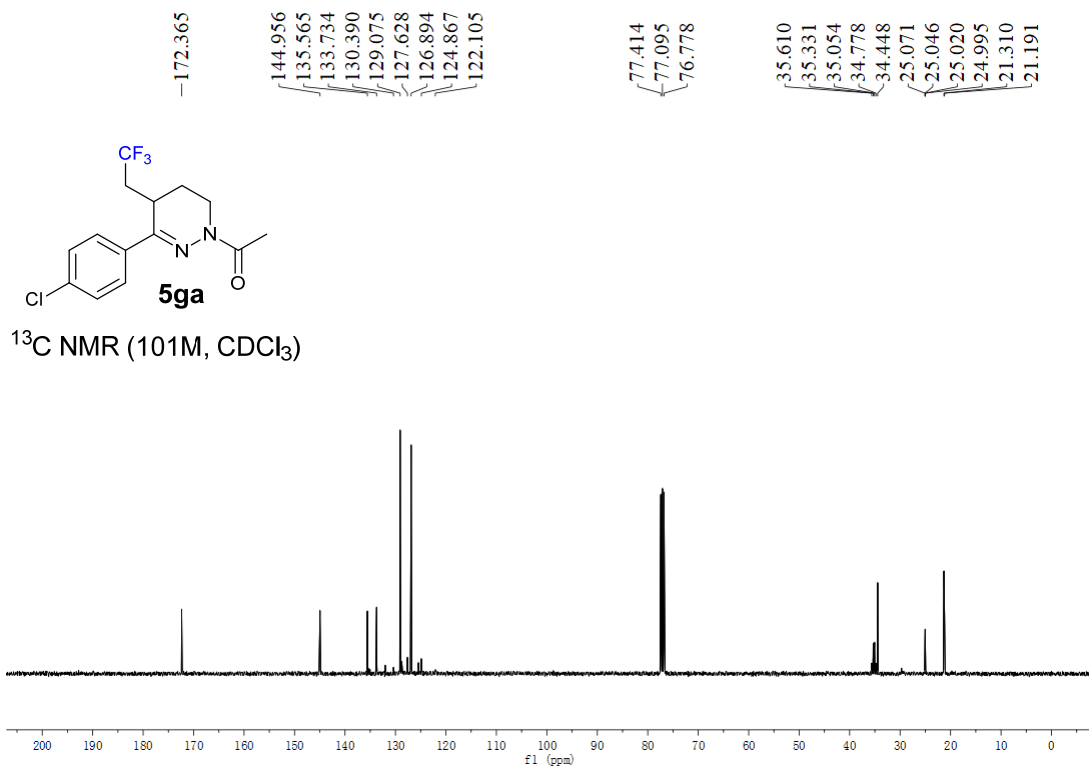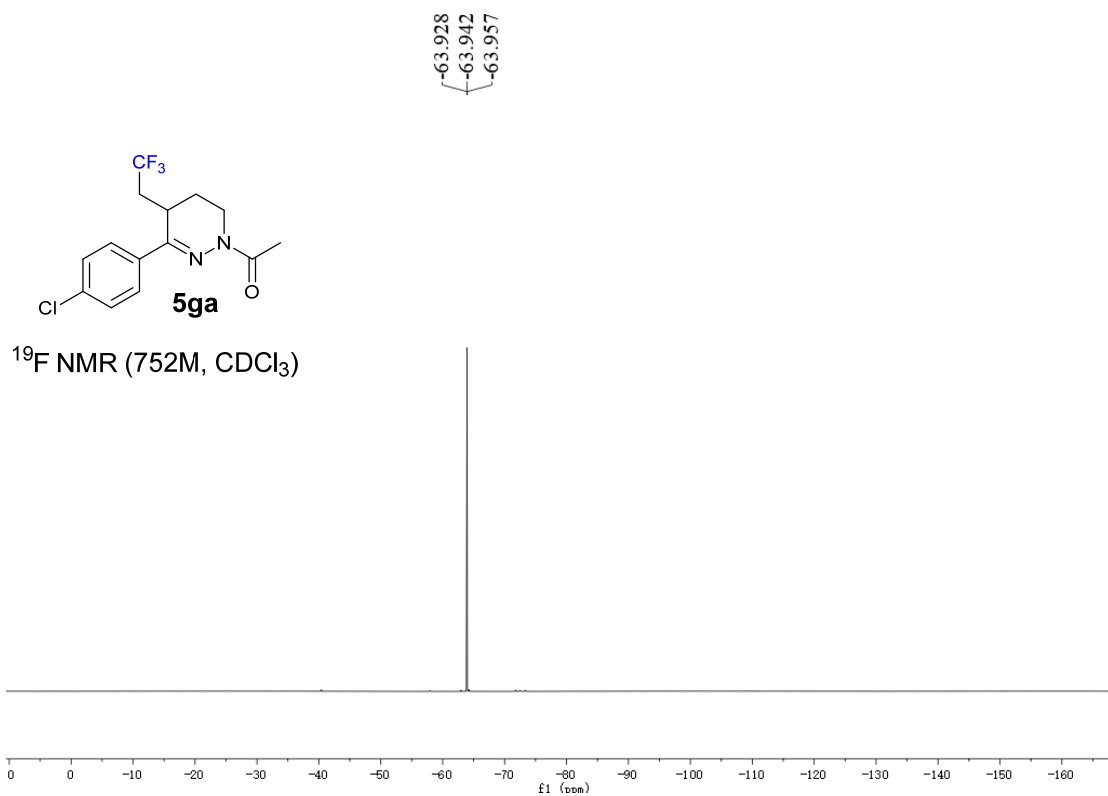

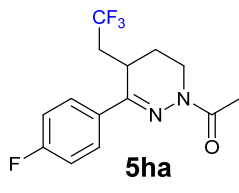

<sup>1</sup>H NMR (400M, CDCl<sub>3</sub>)

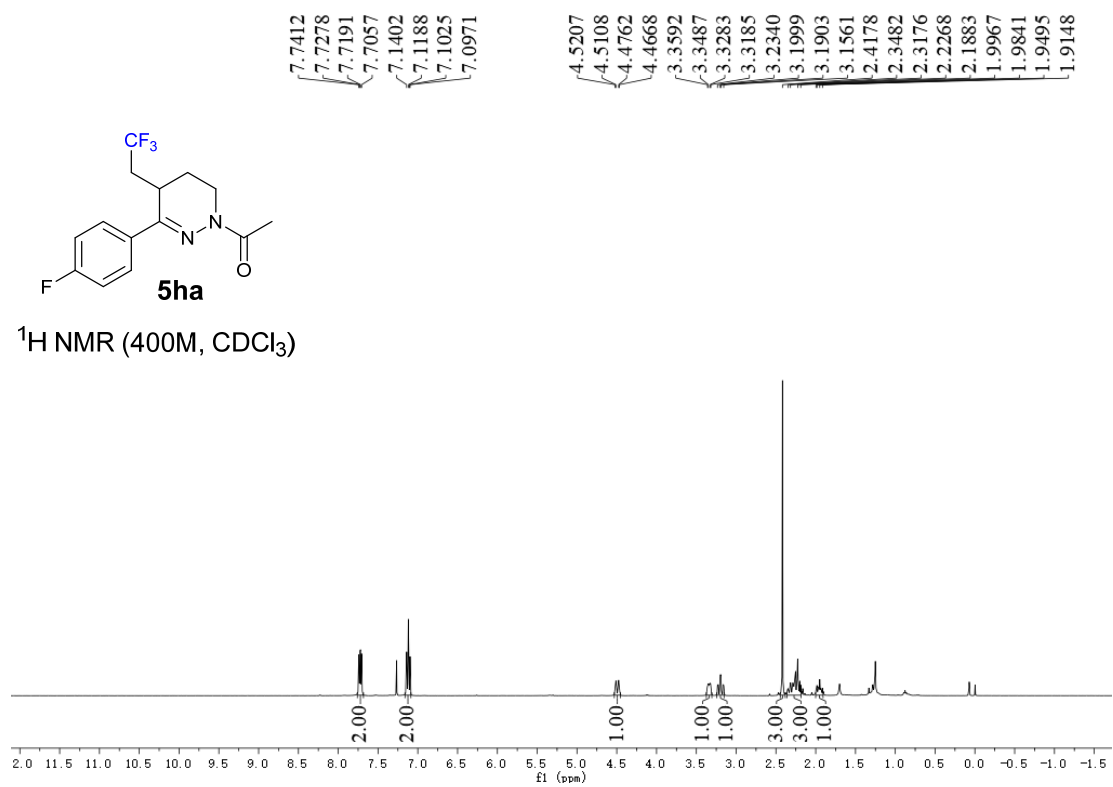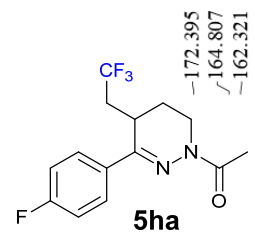

<sup>13</sup>C NMR (101M, CDCl<sub>3</sub>)

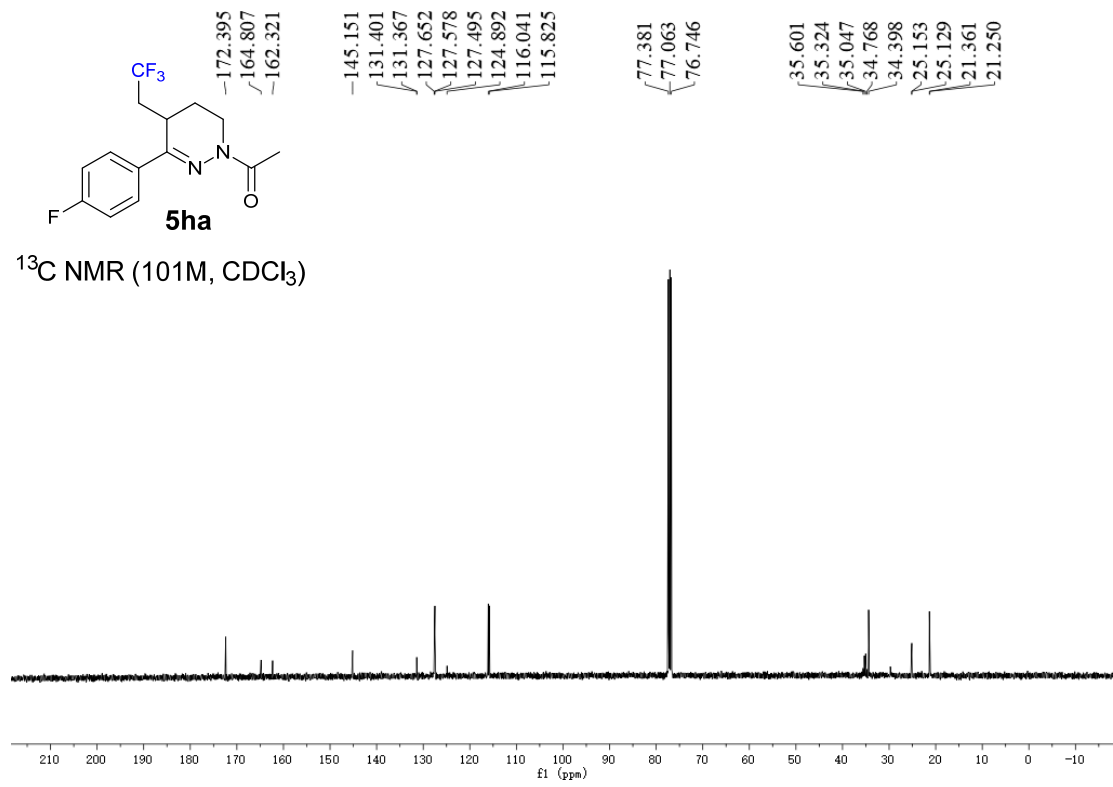

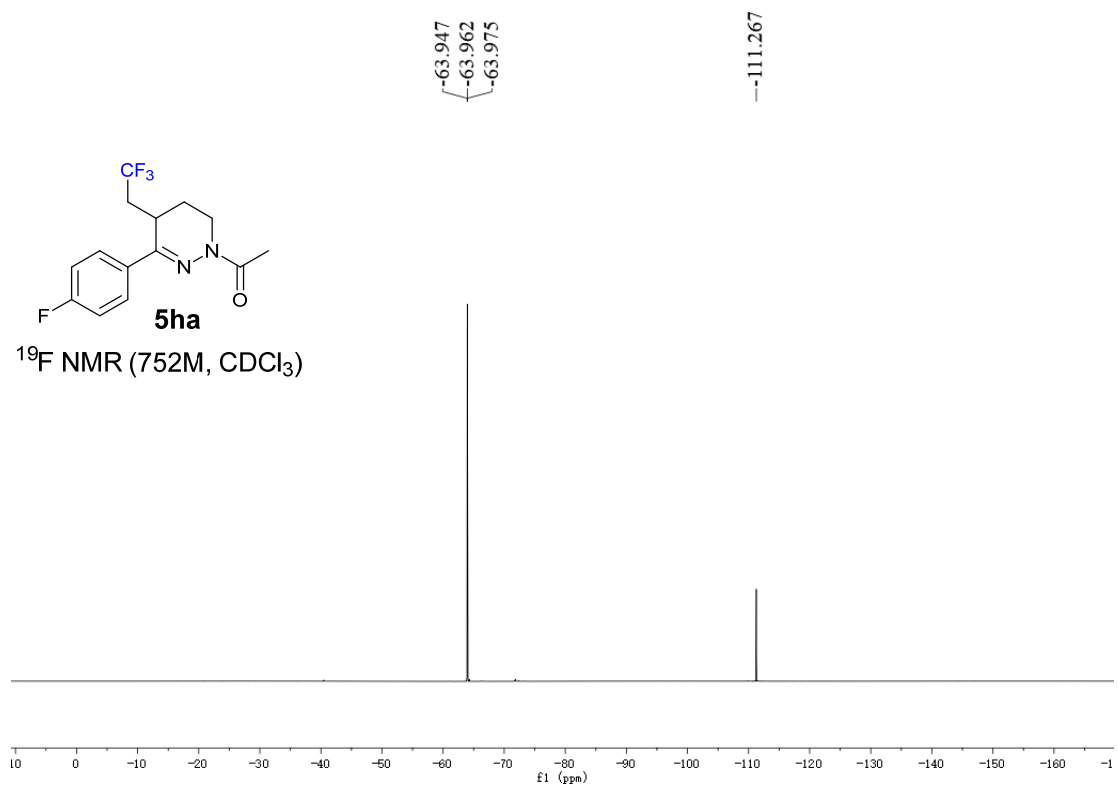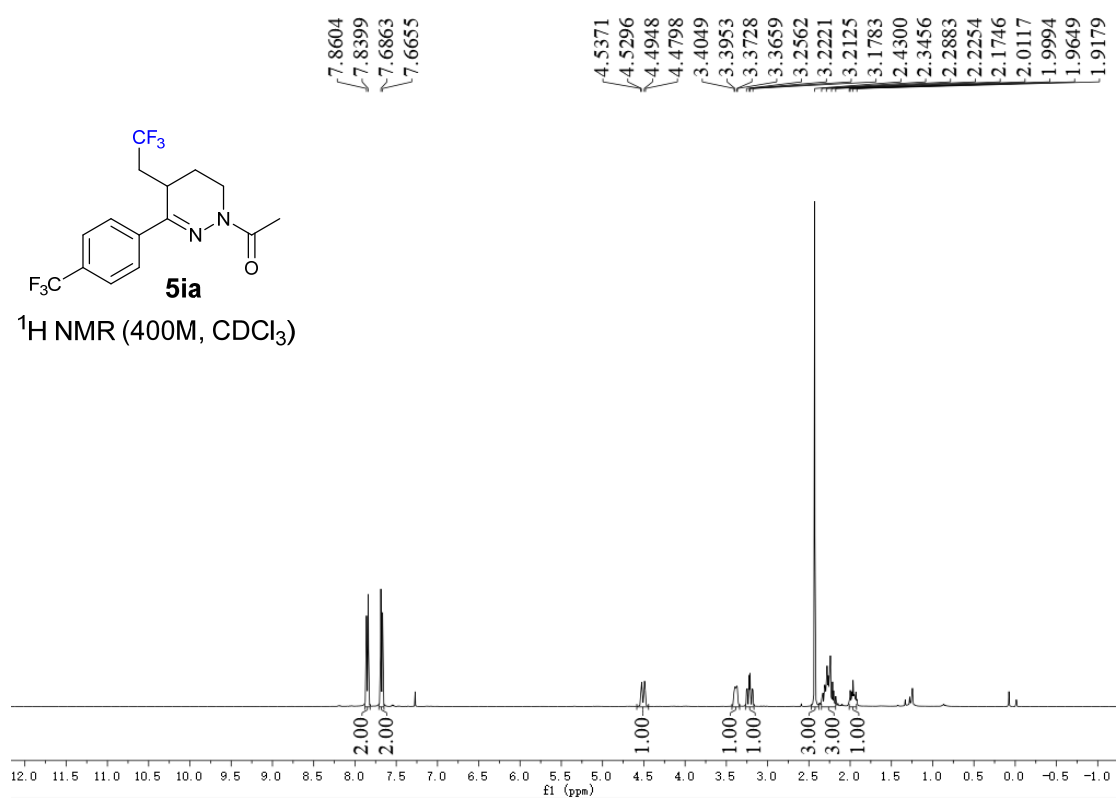

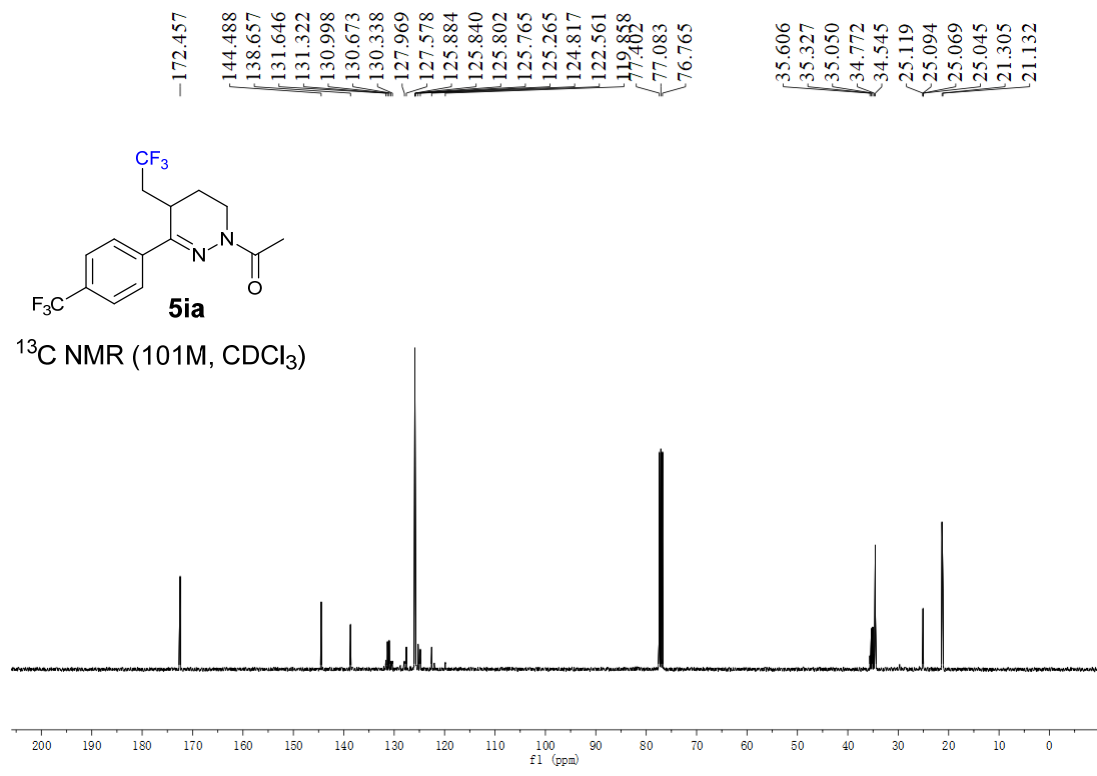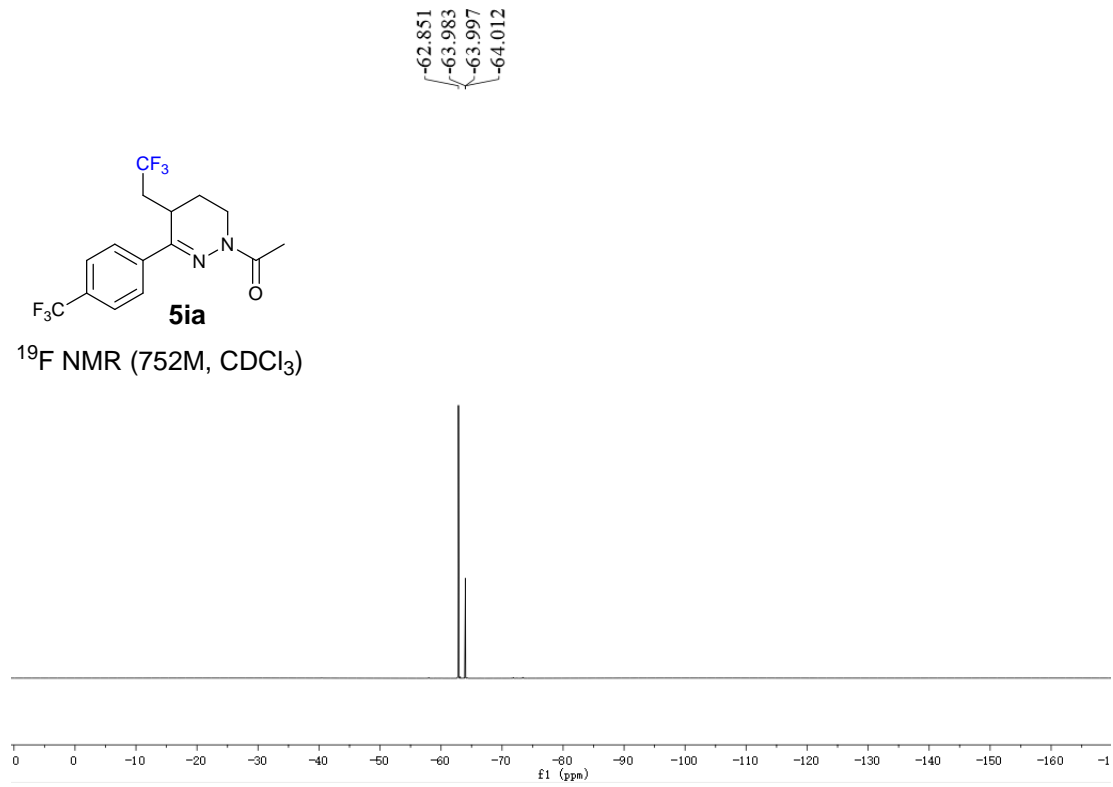



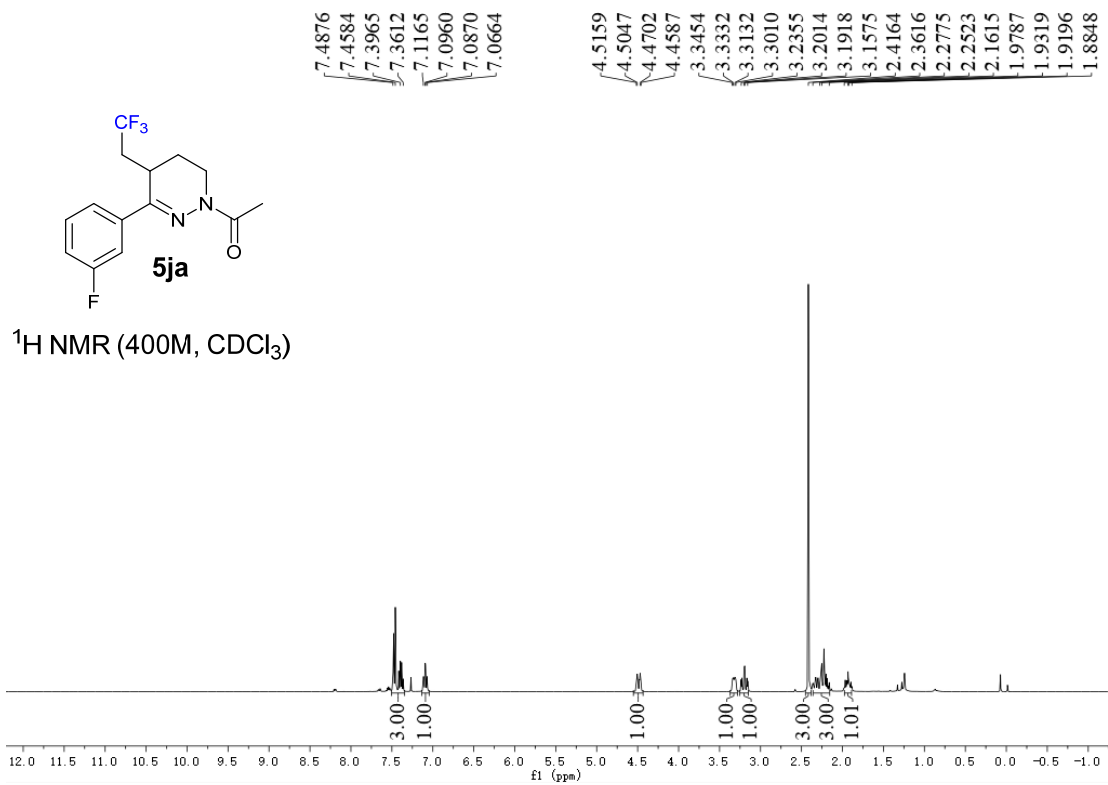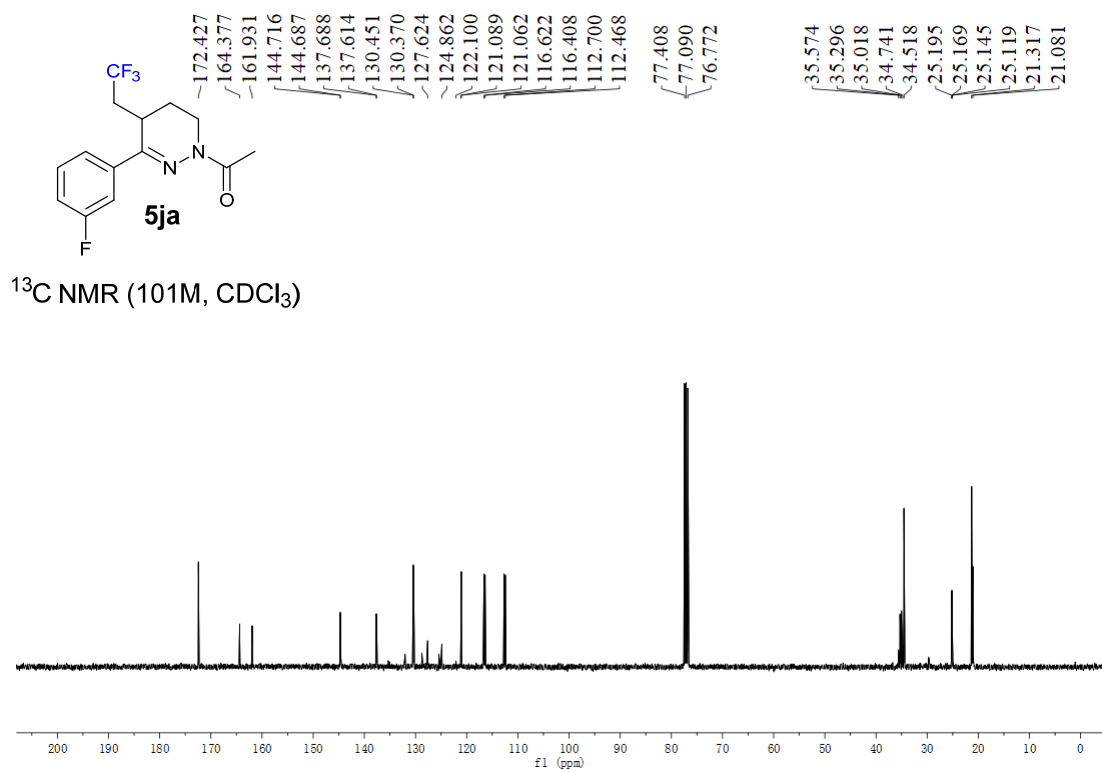

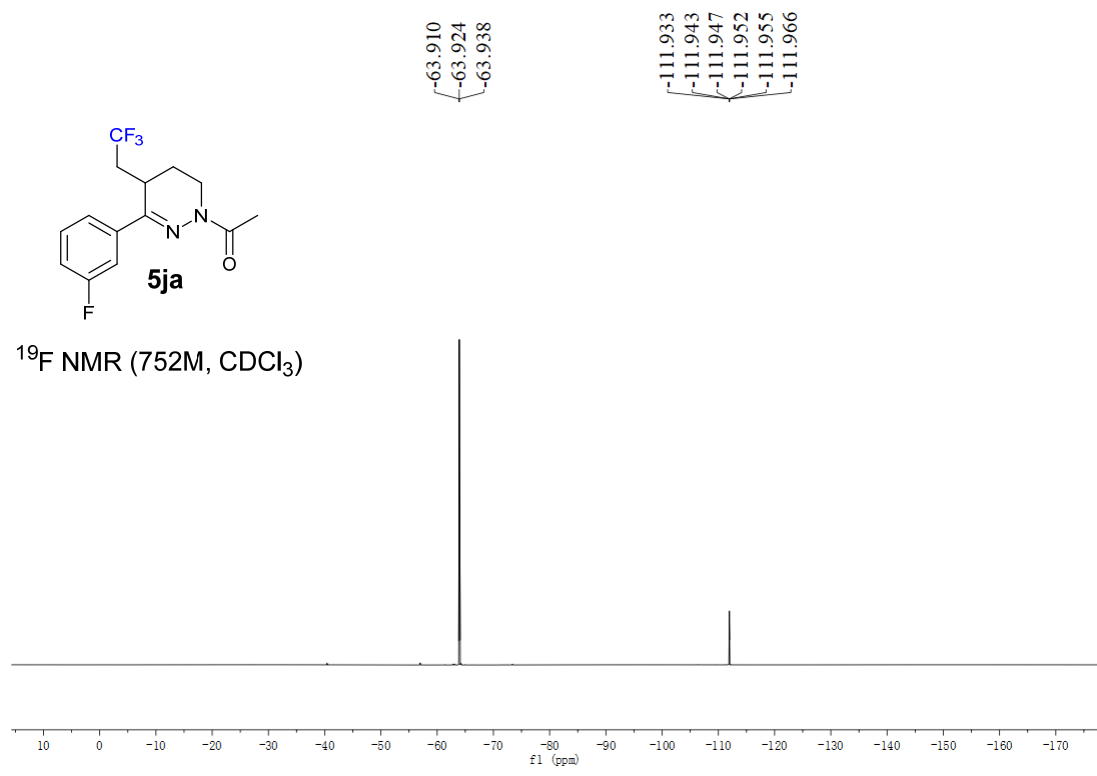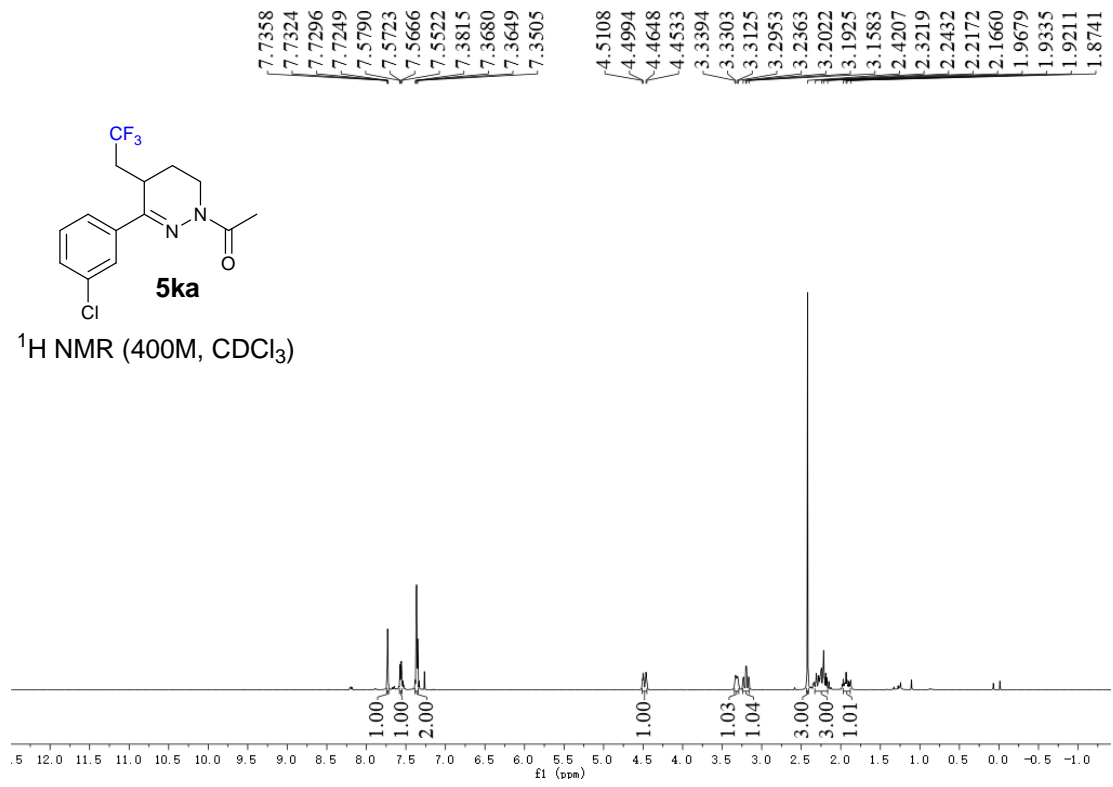

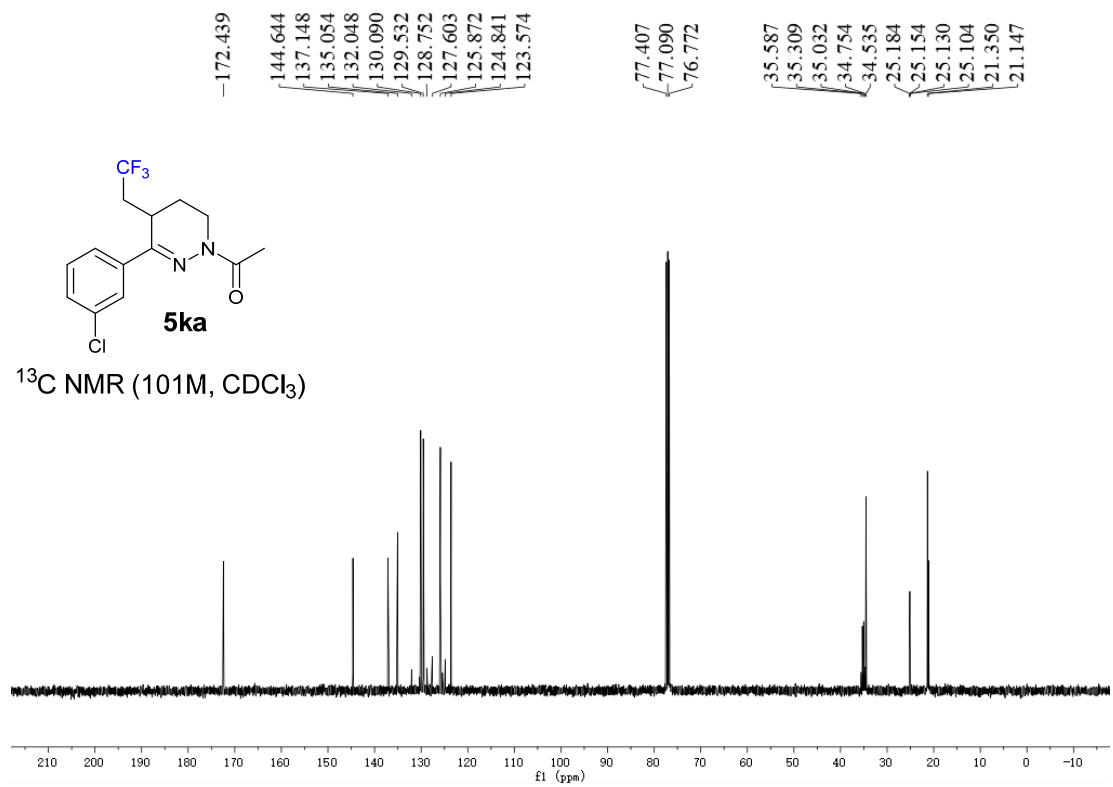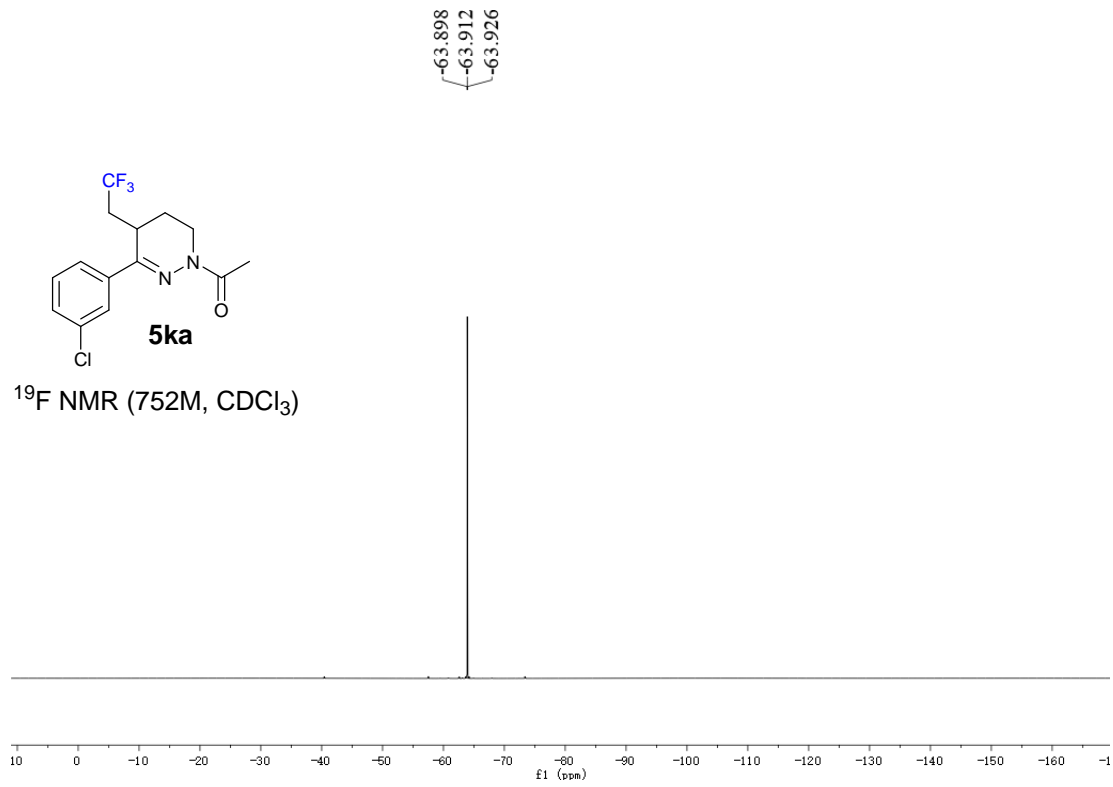

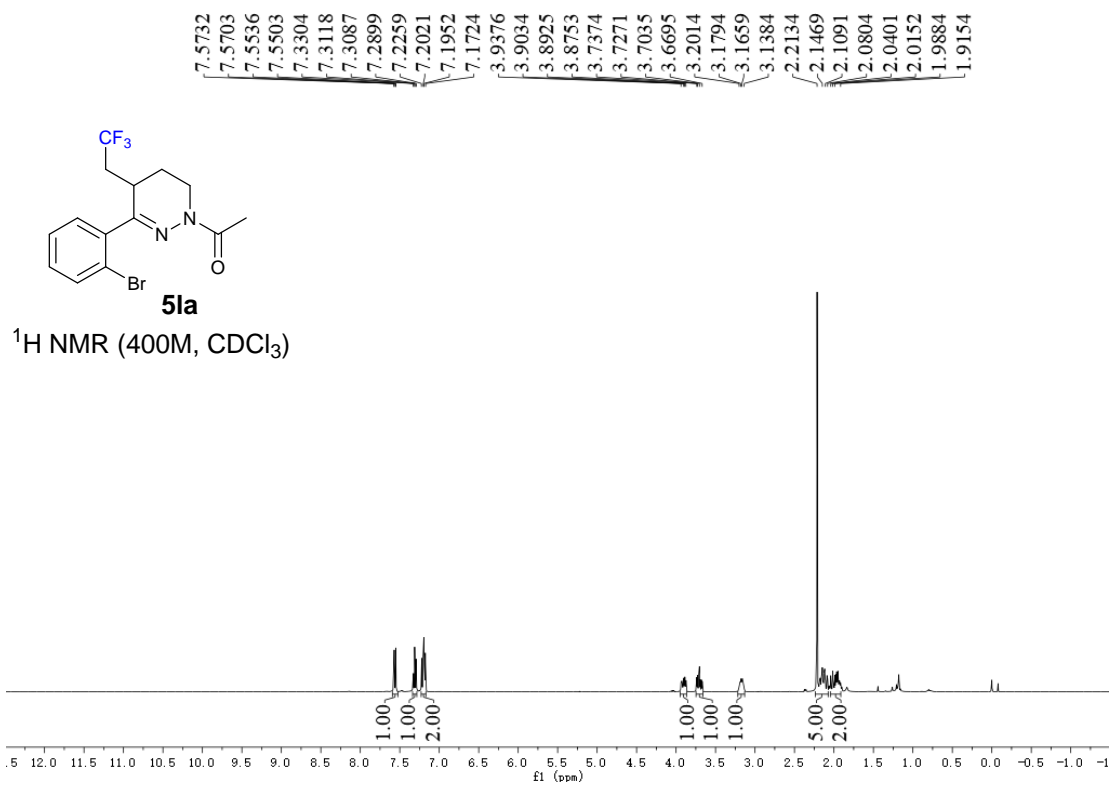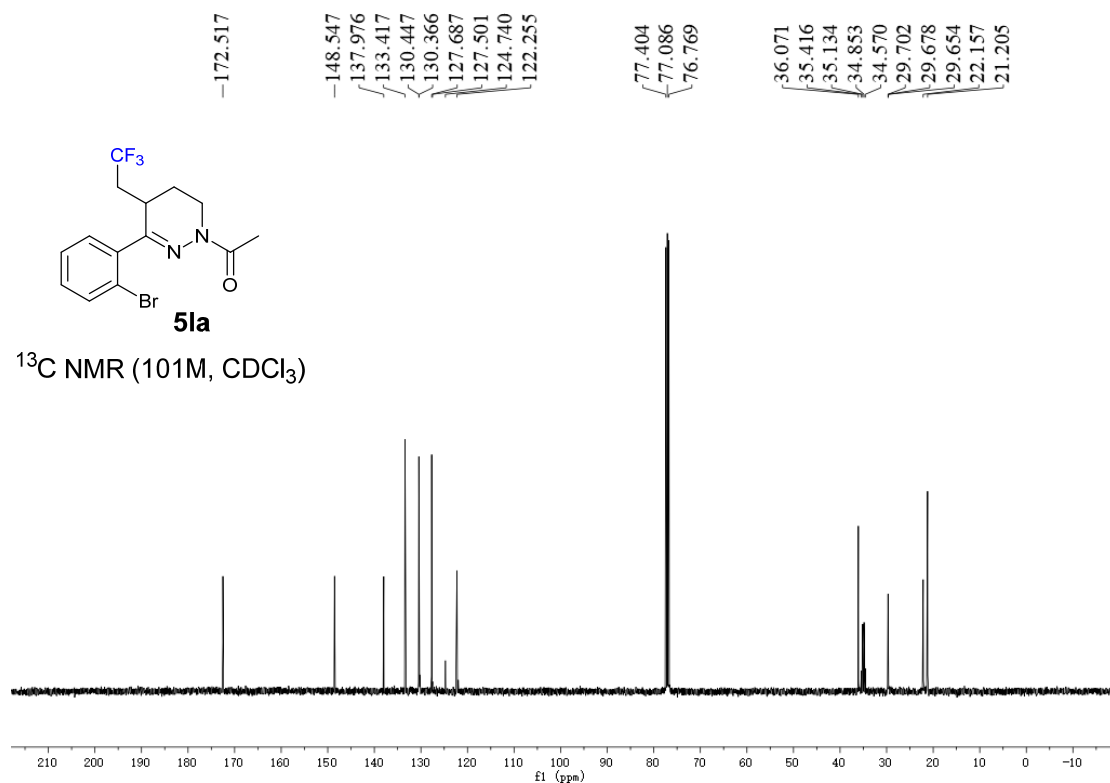

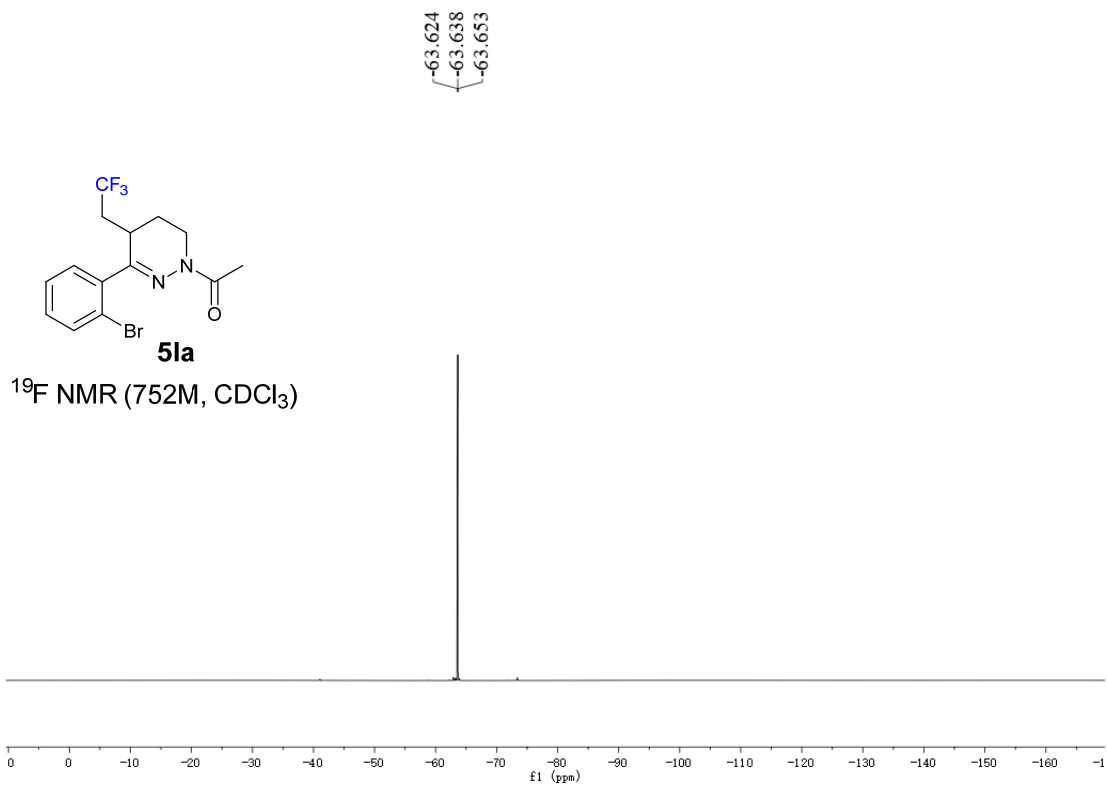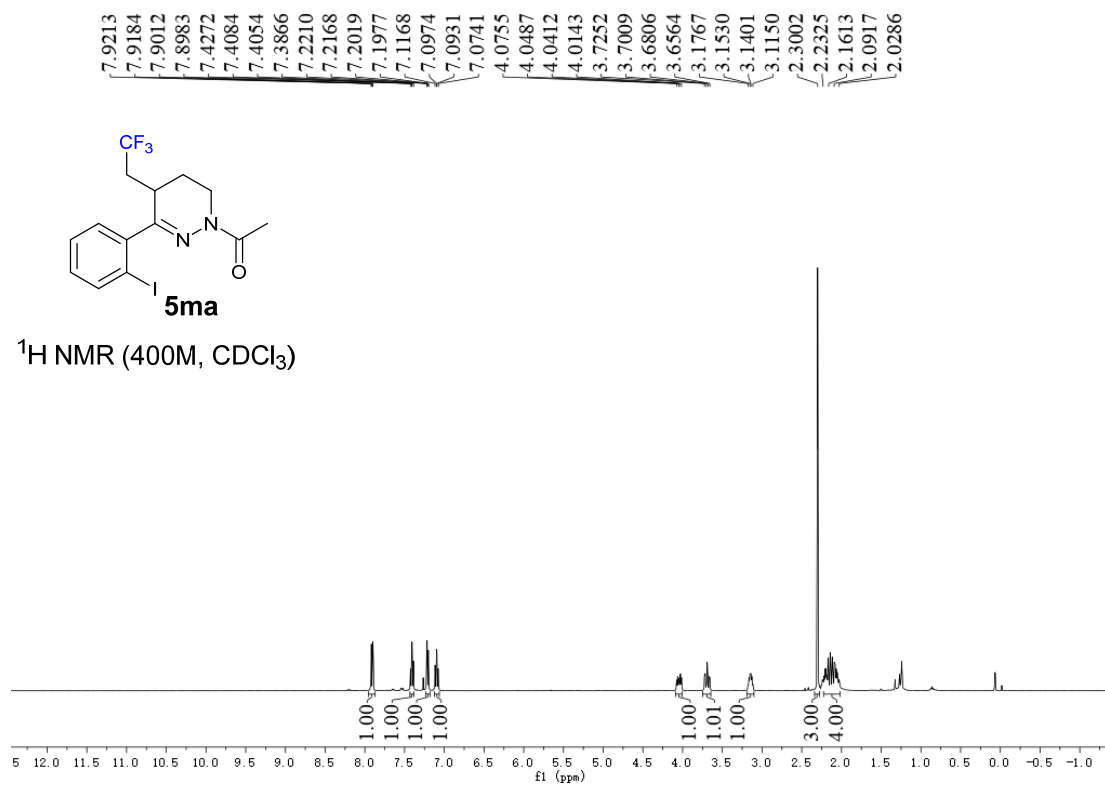

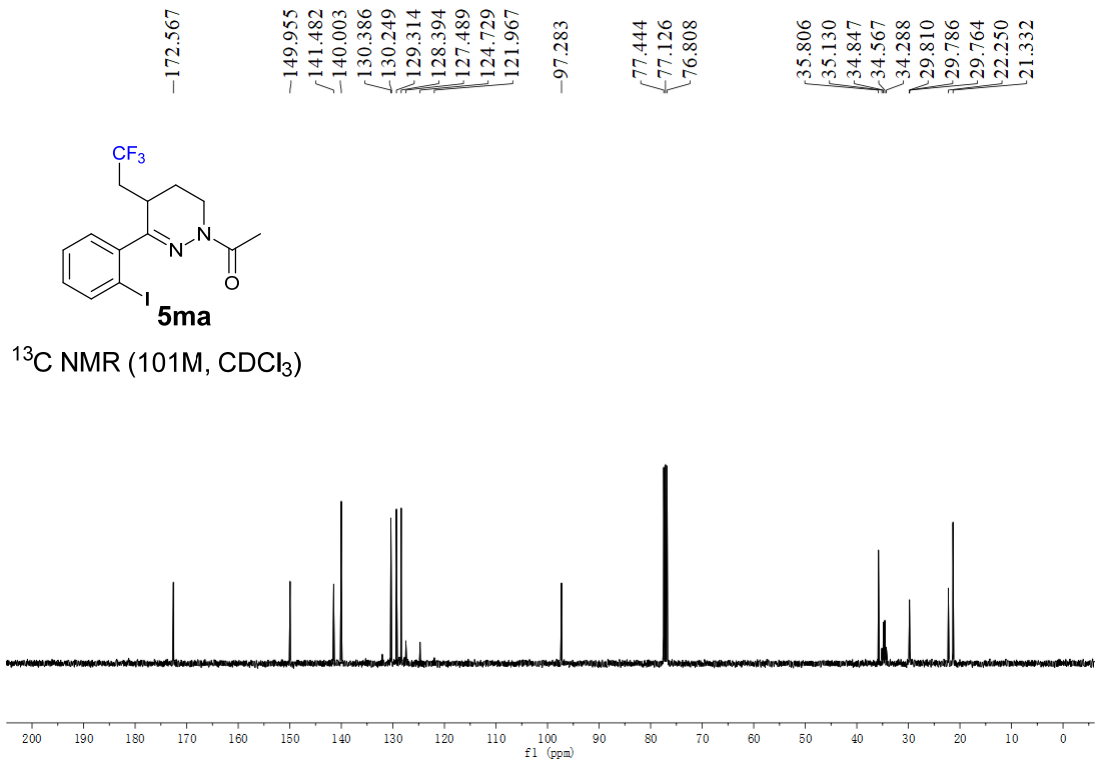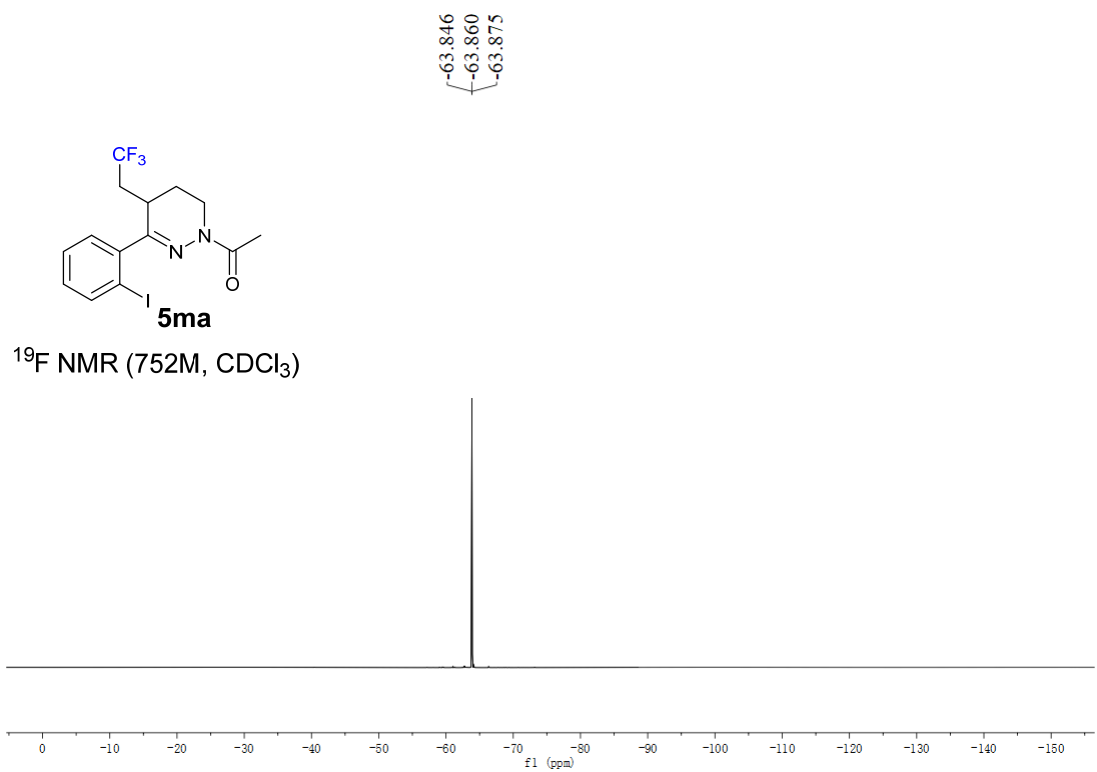

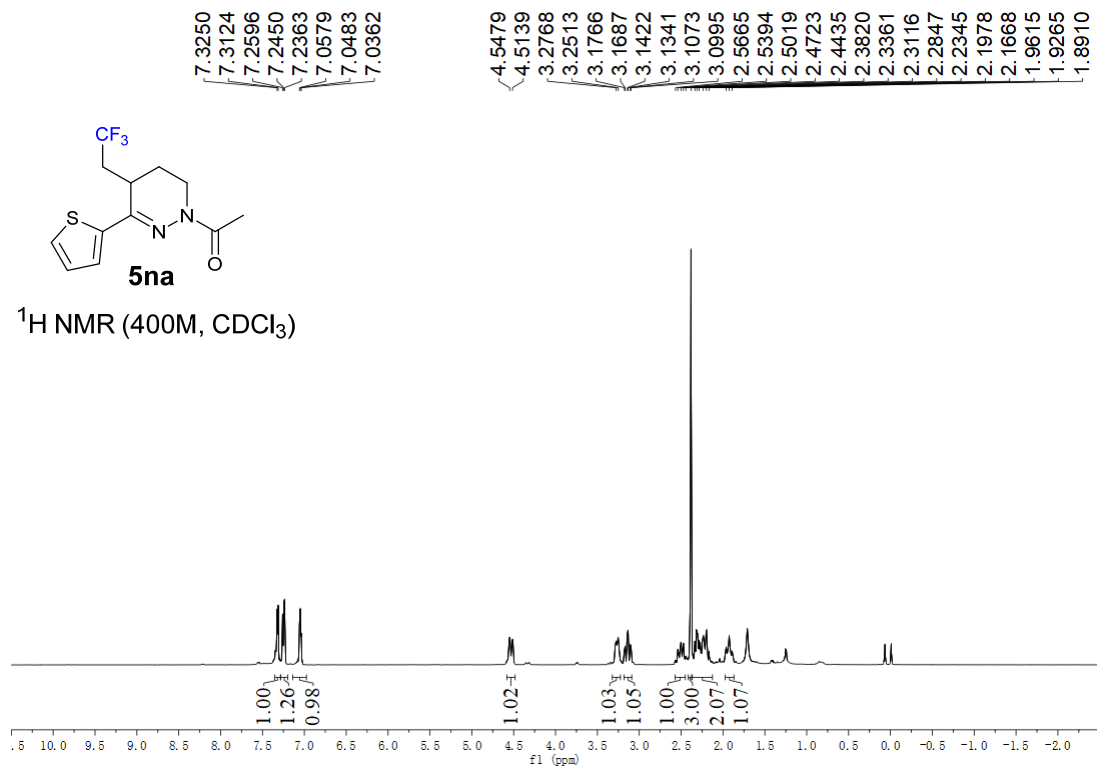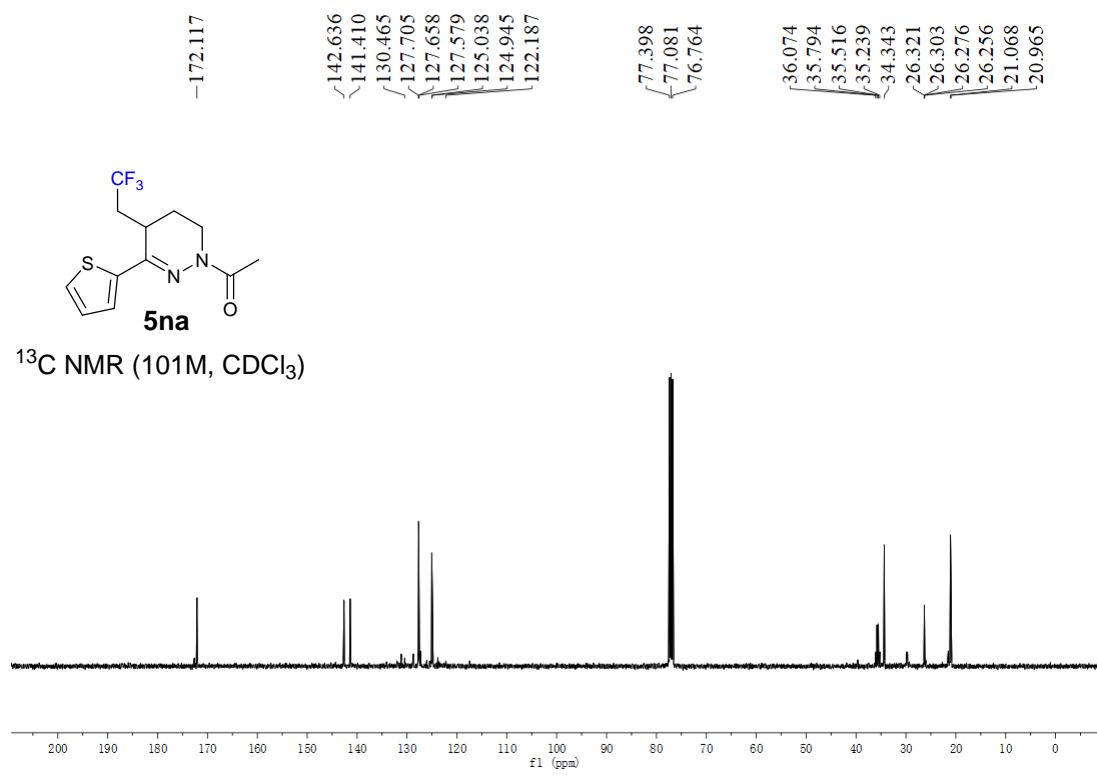

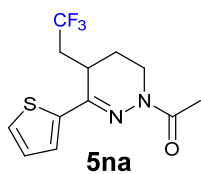

$^{19}\text{F}$  NMR (752M,  $\text{CDCl}_3$ )

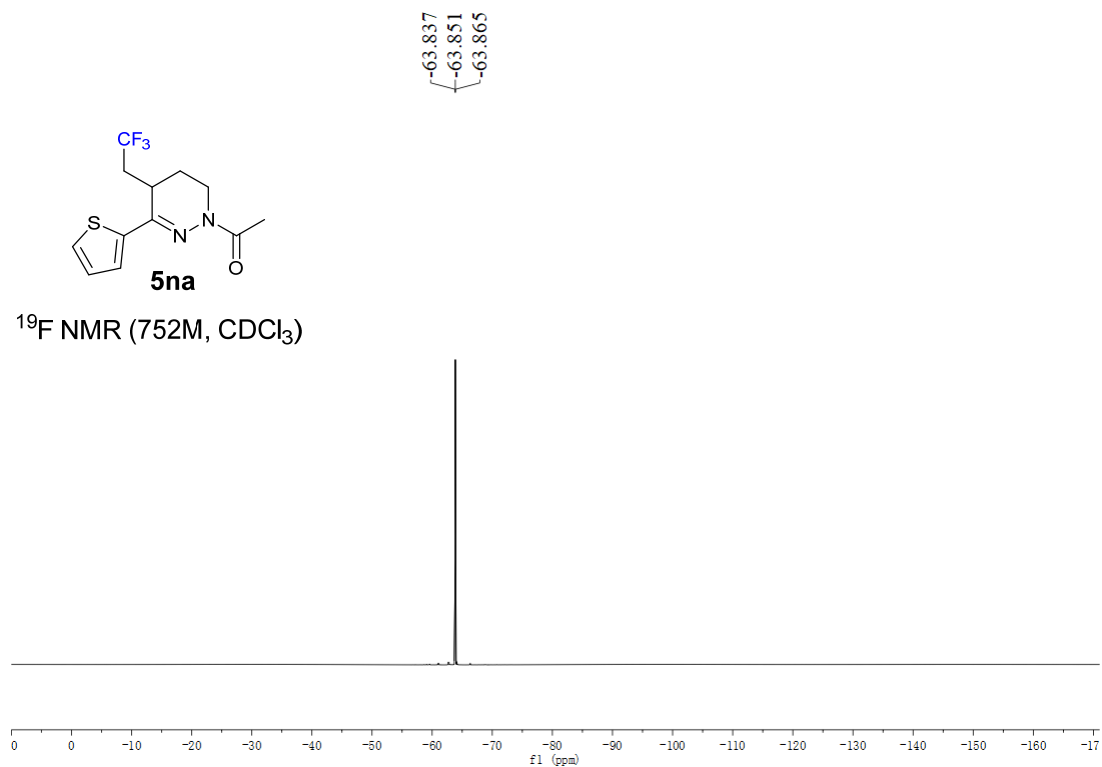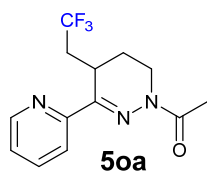

$^1\text{H}$  NMR (400M,  $\text{CDCl}_3$ )

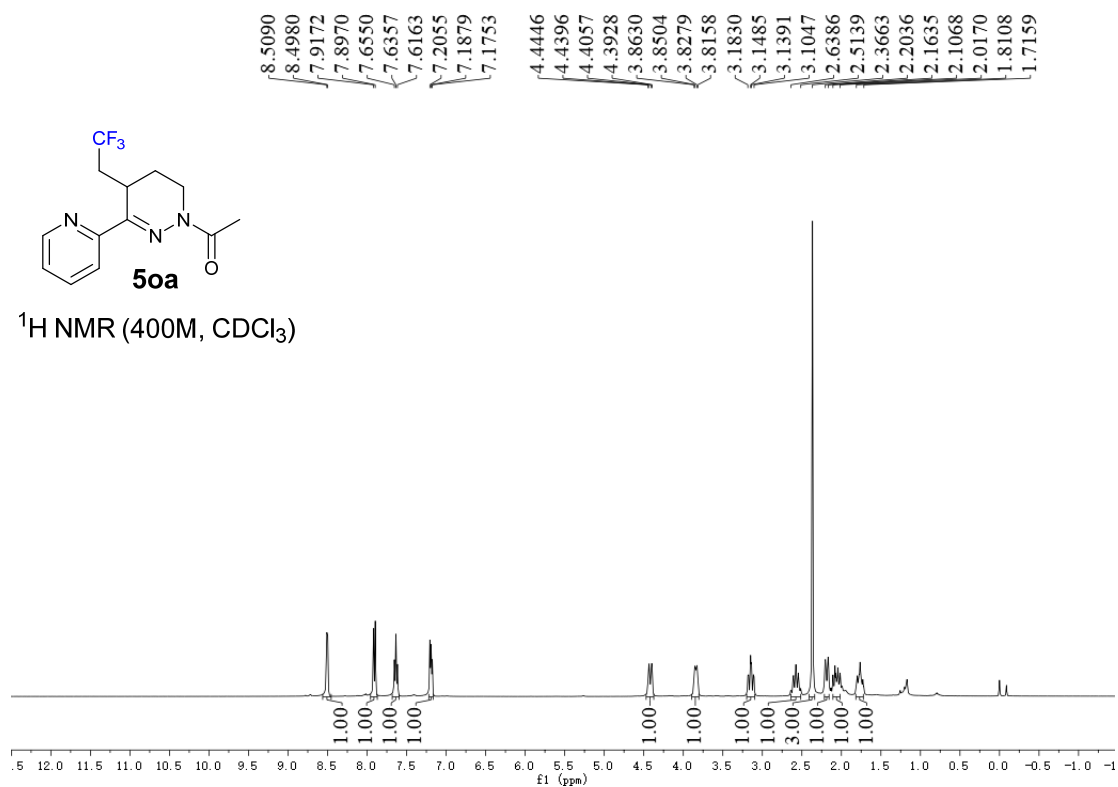



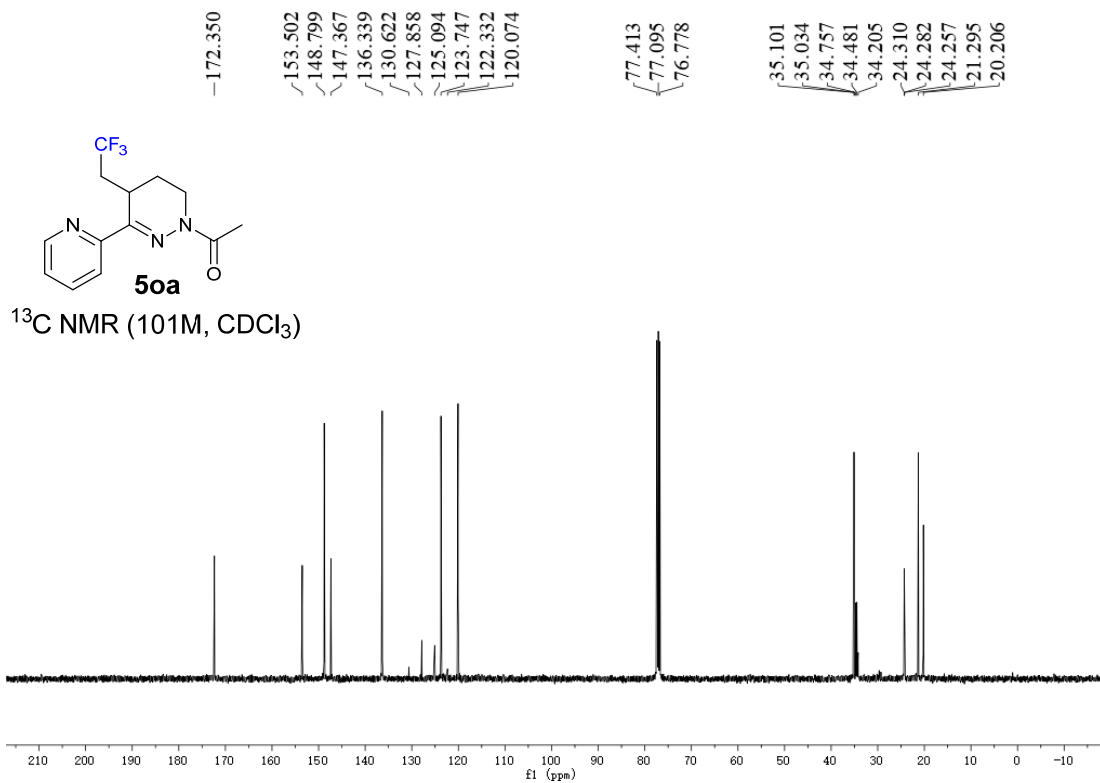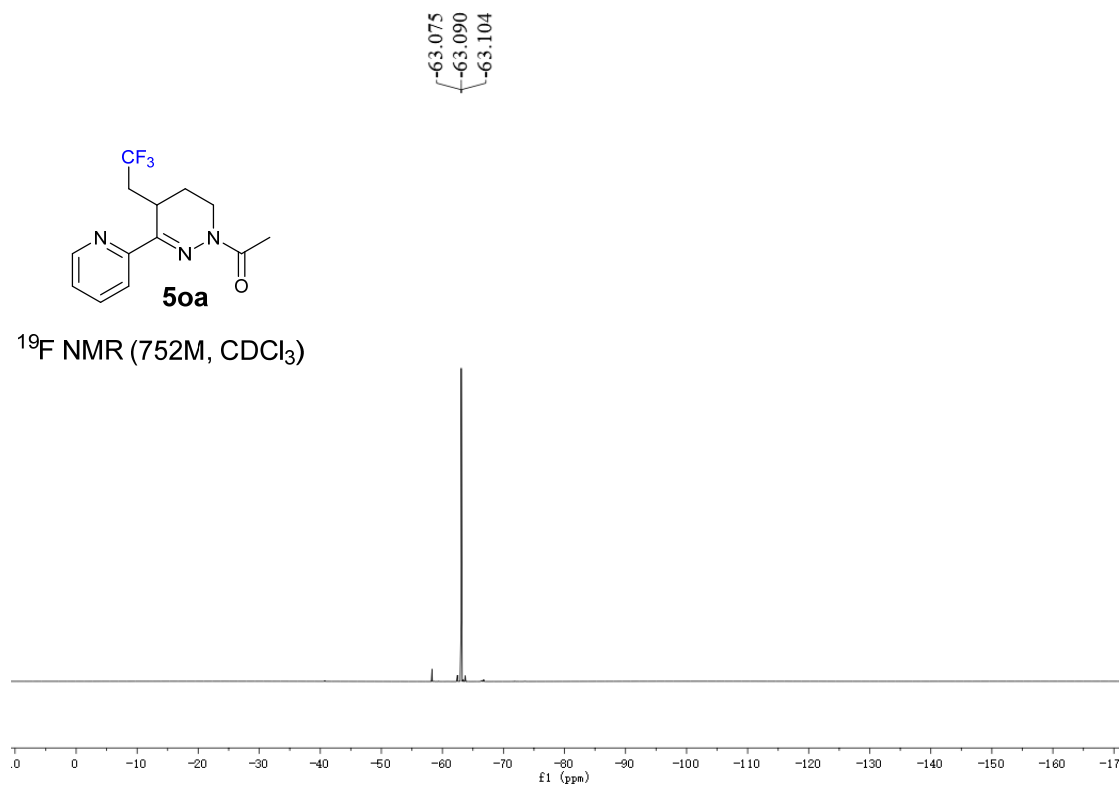

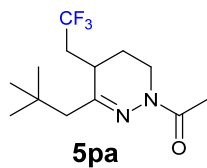

$^1\text{H NMR}$  (400M,  $\text{CDCl}_3$ )

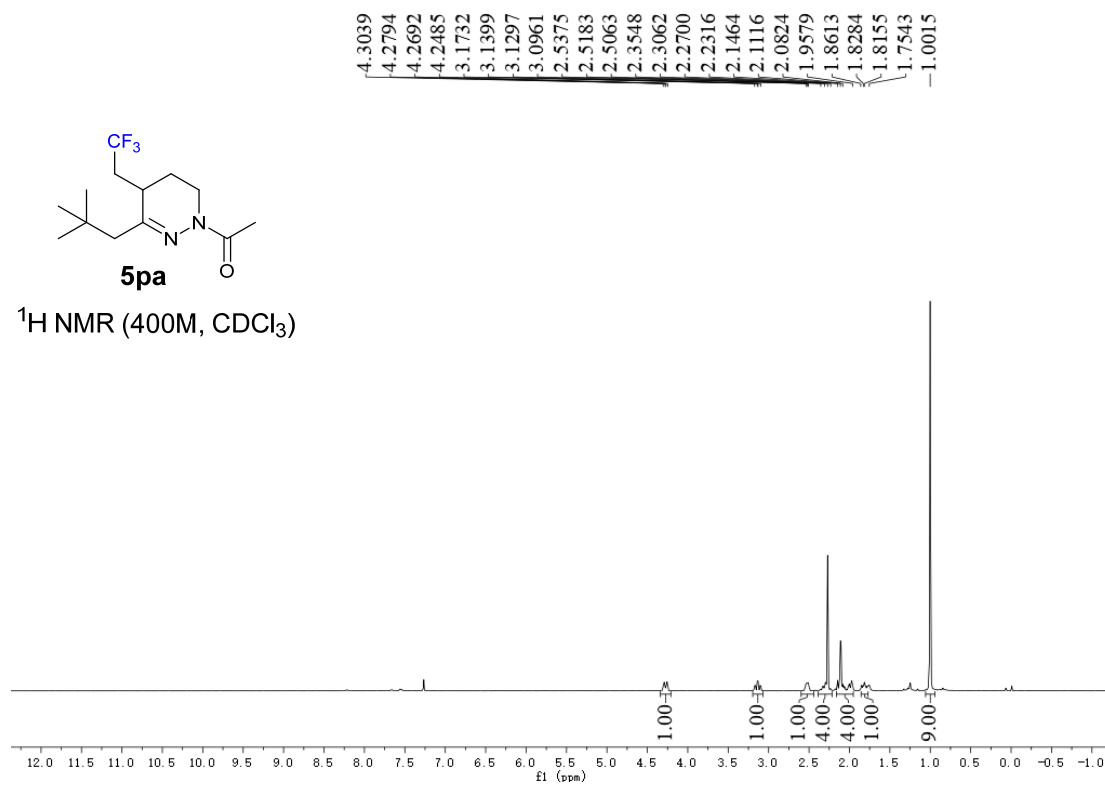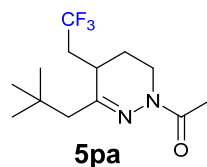

$^{13}\text{C NMR}$  (101M,  $\text{CDCl}_3$ )

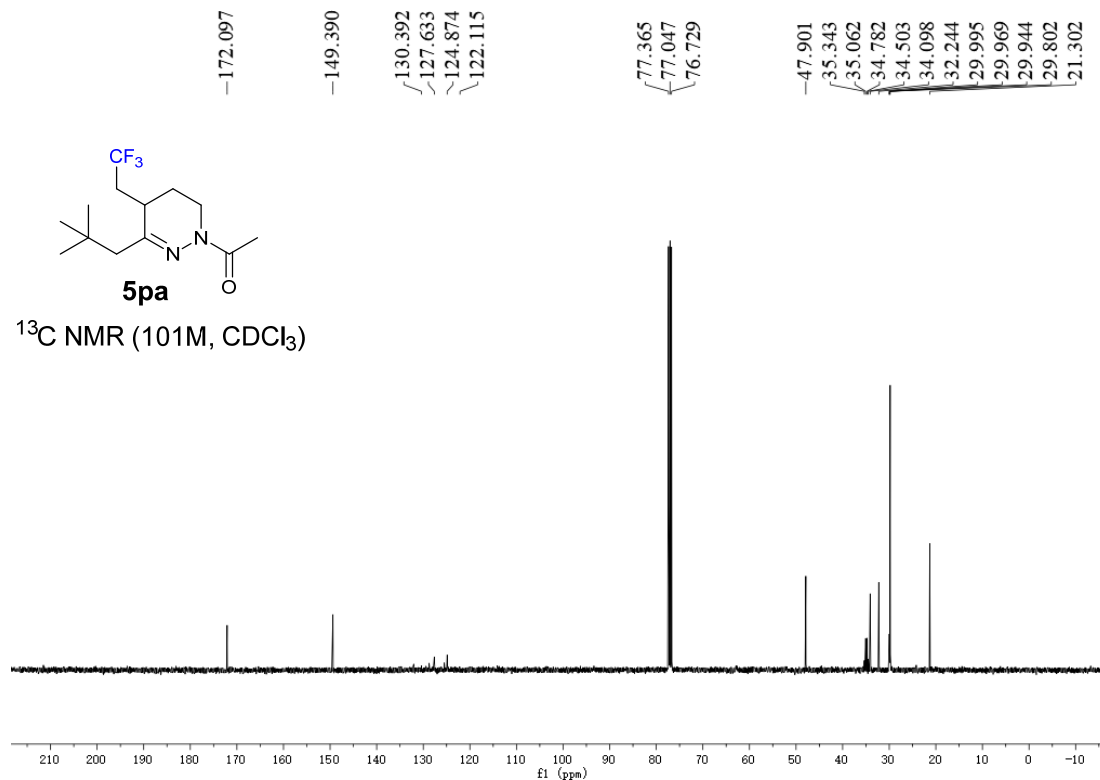

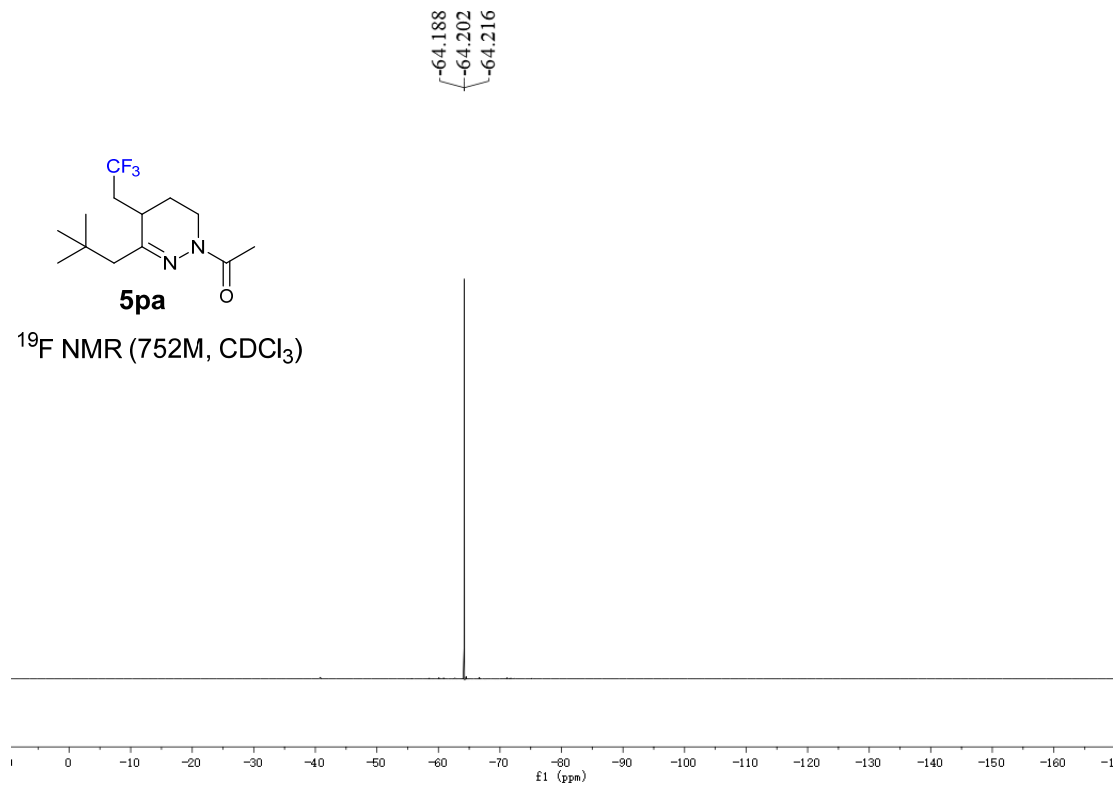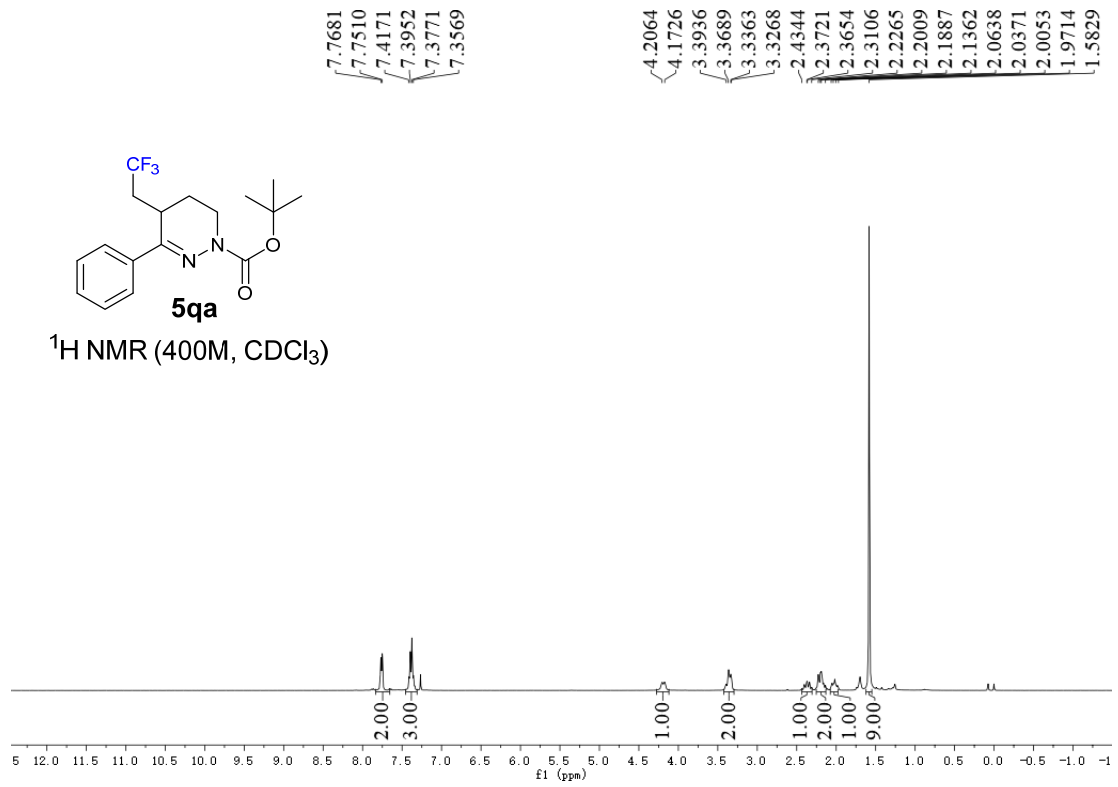

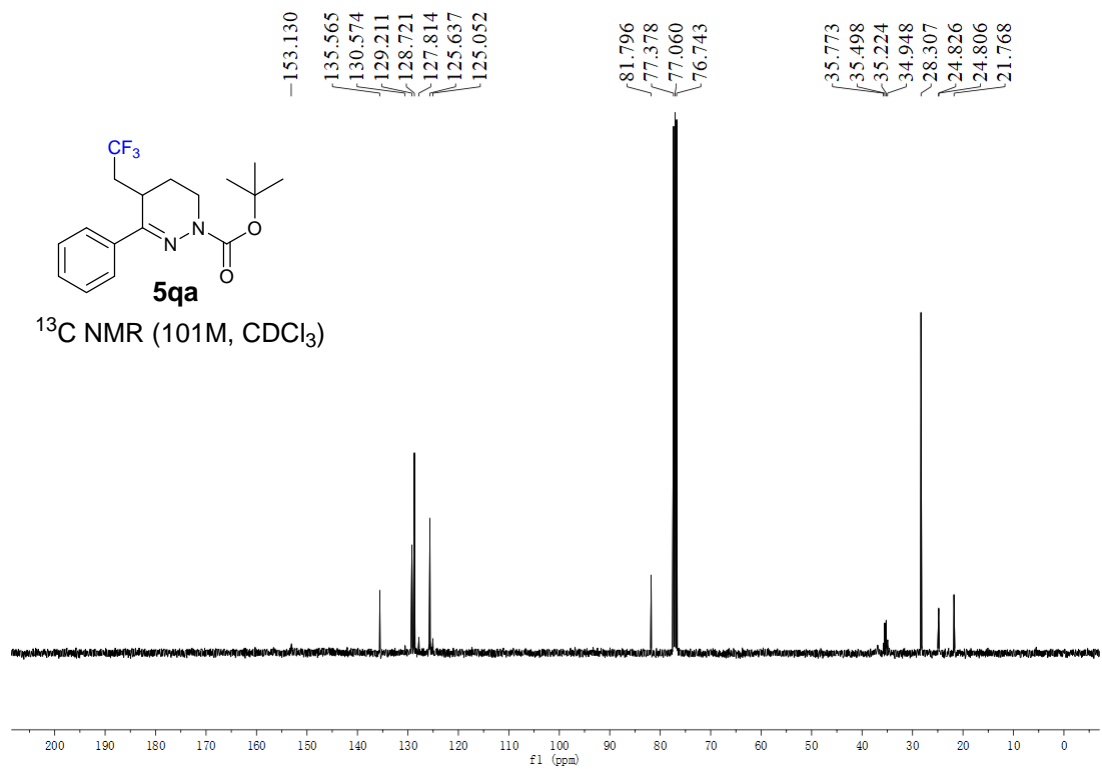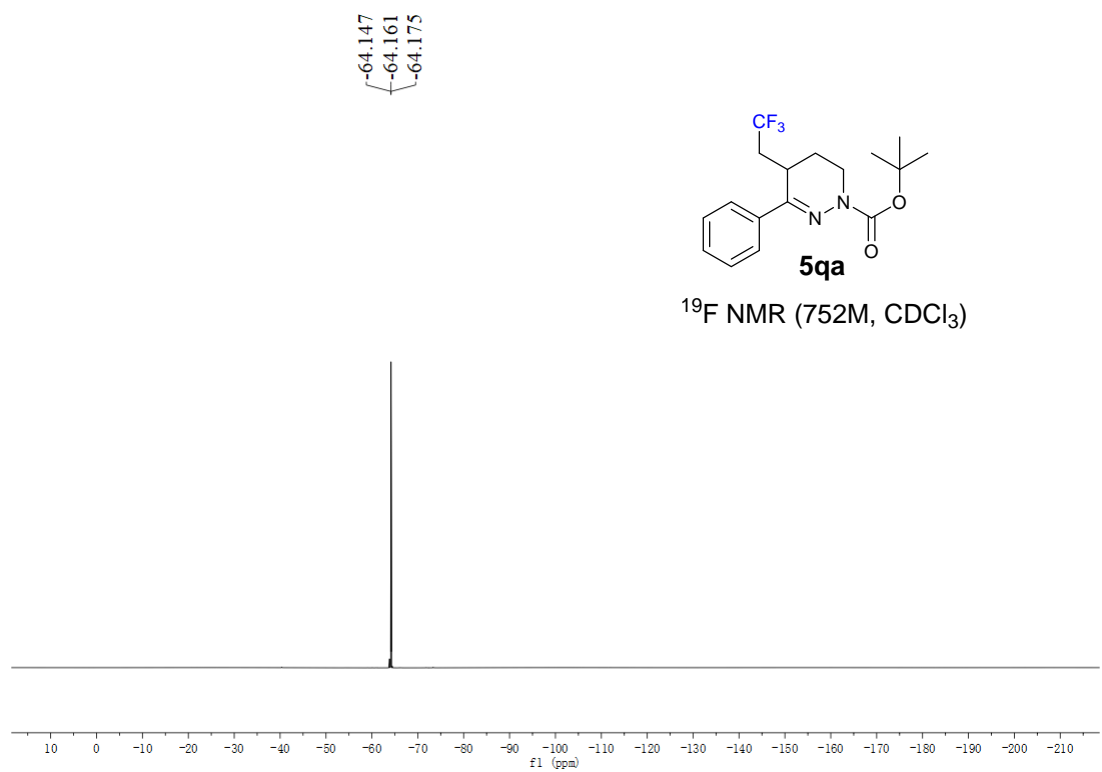

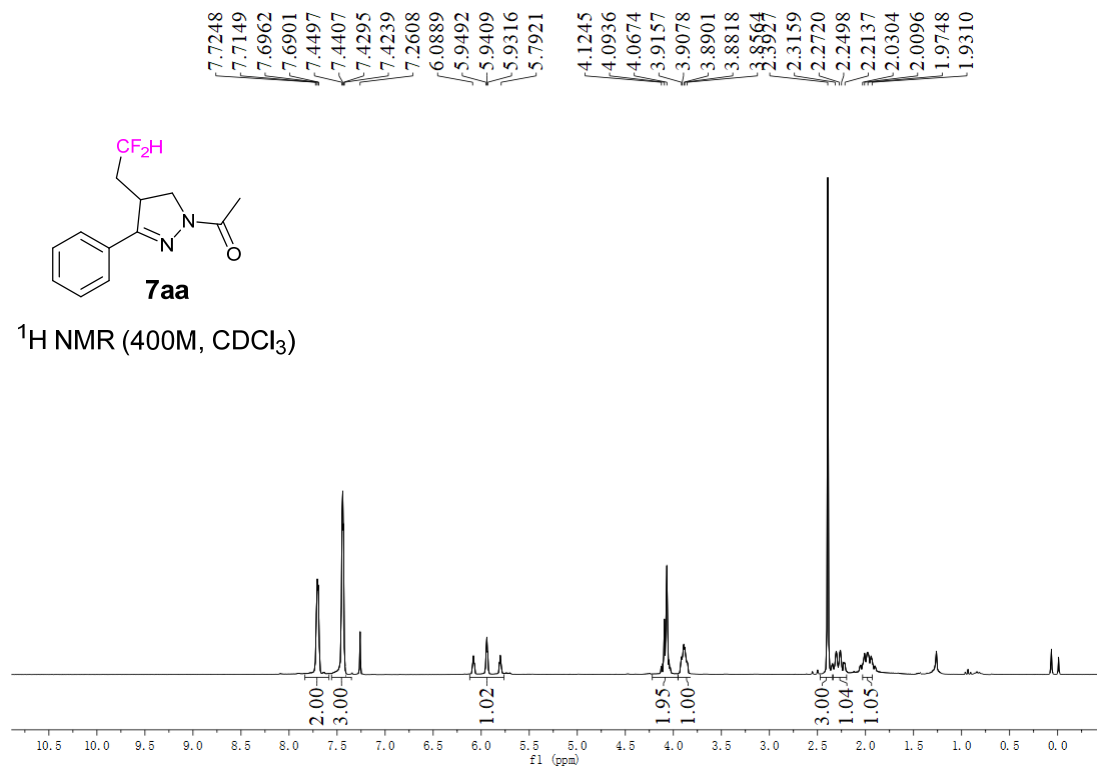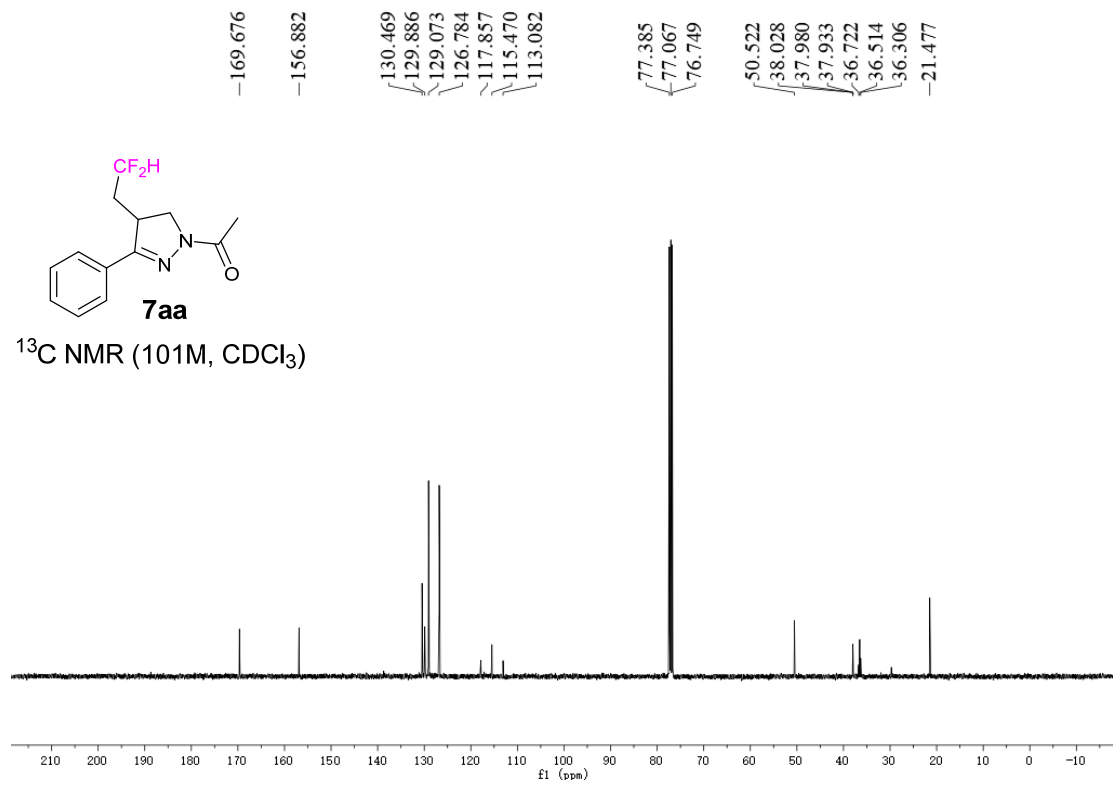

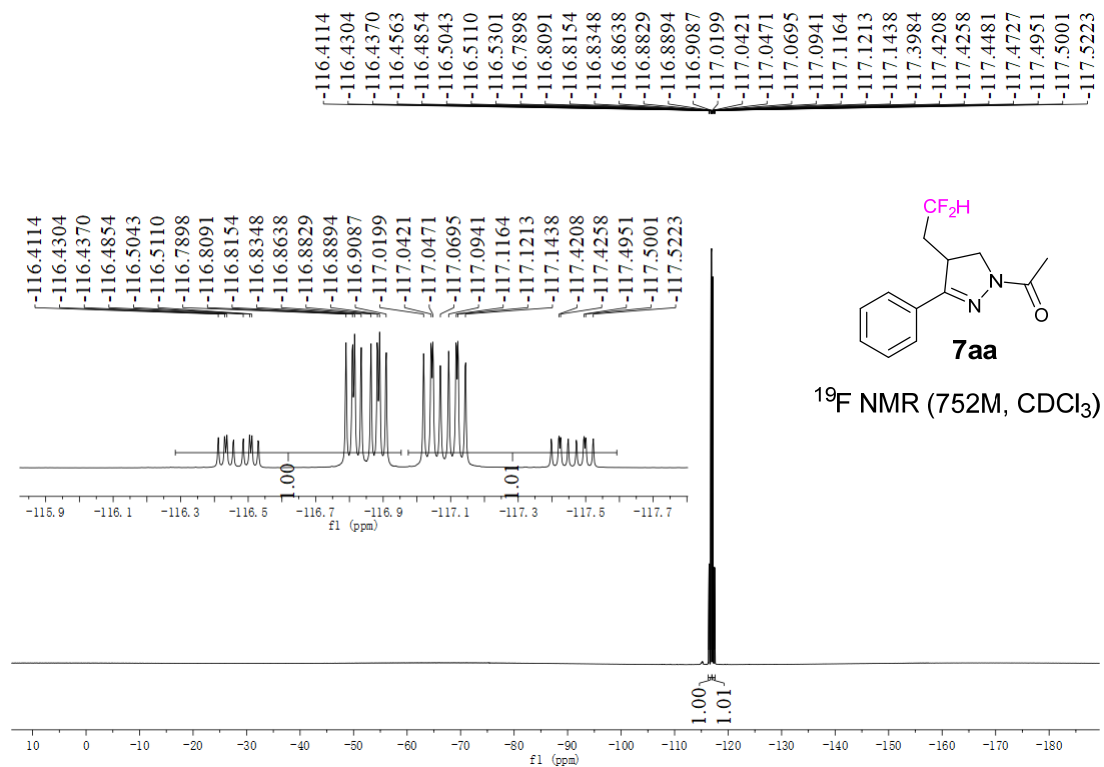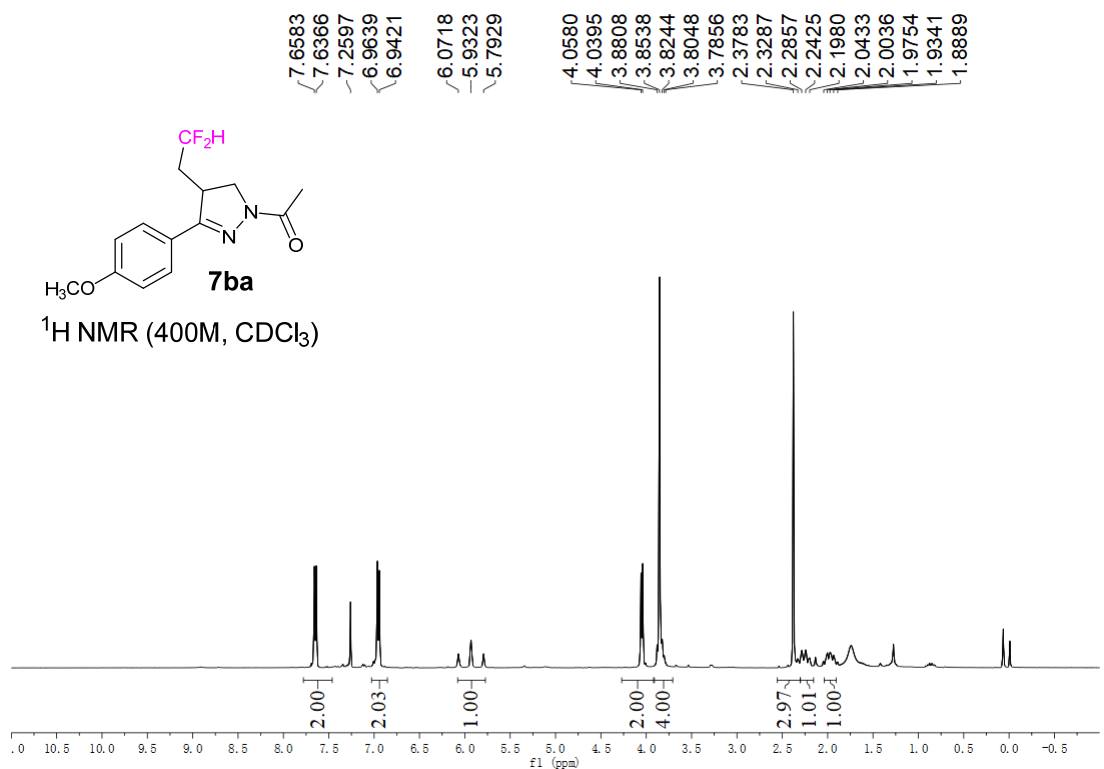

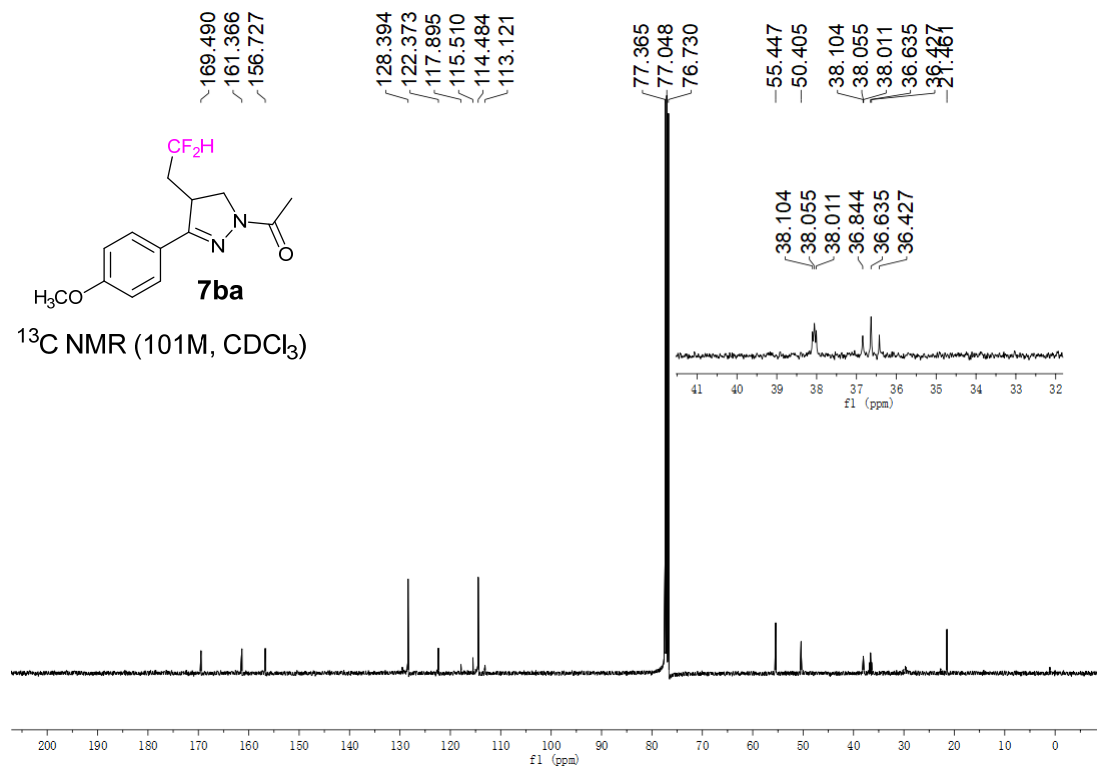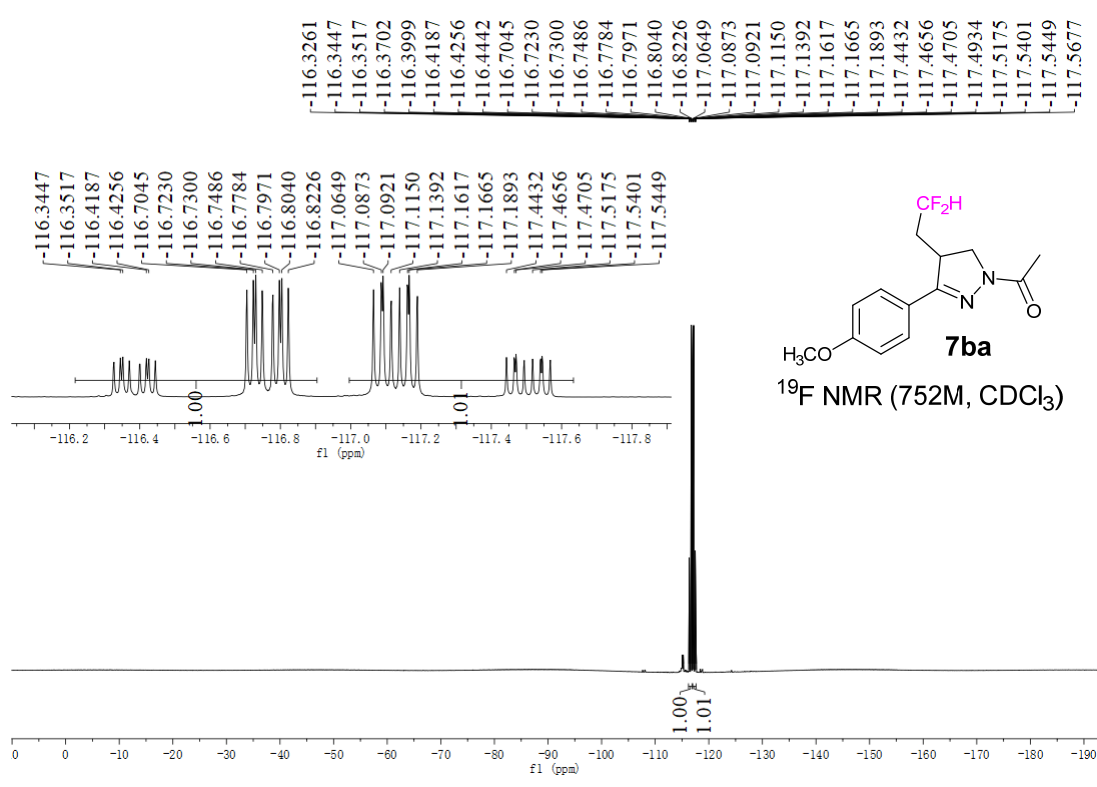

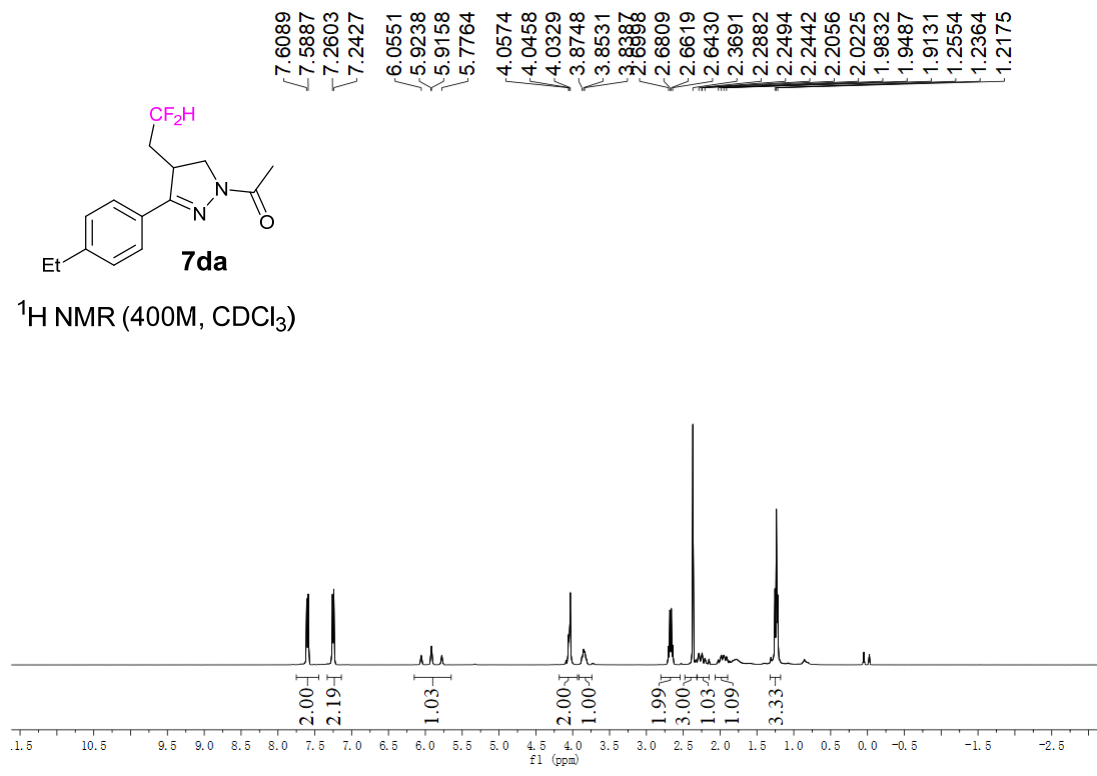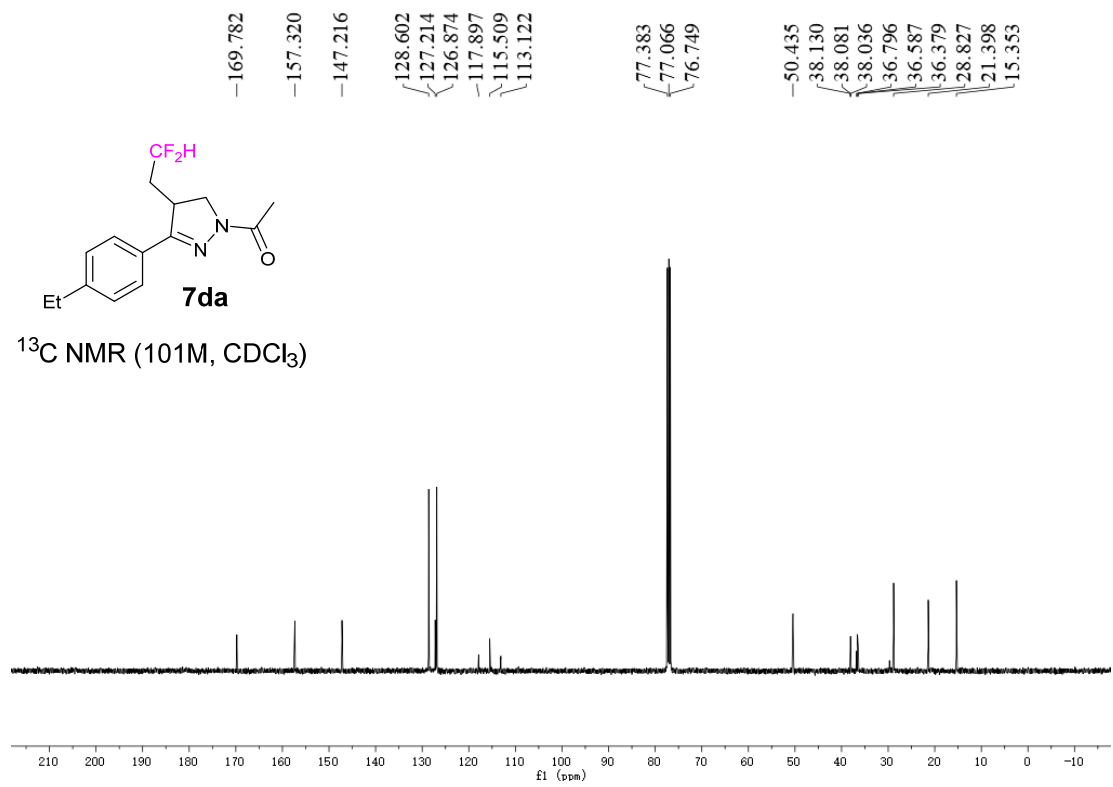



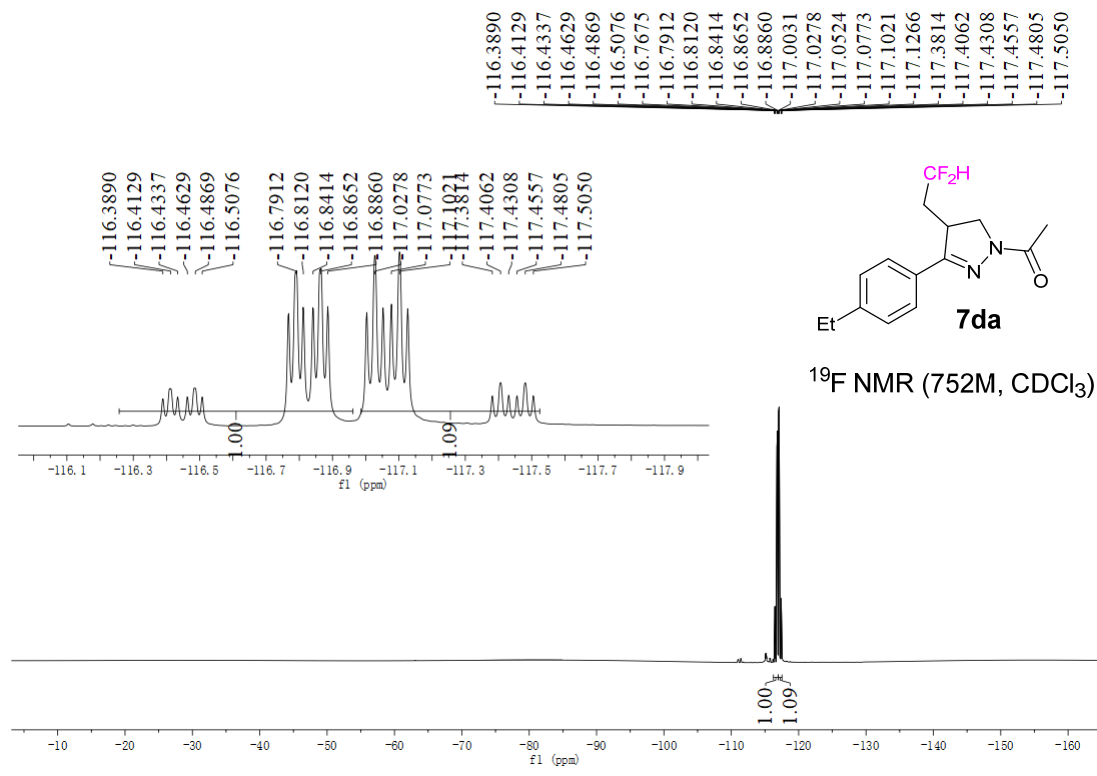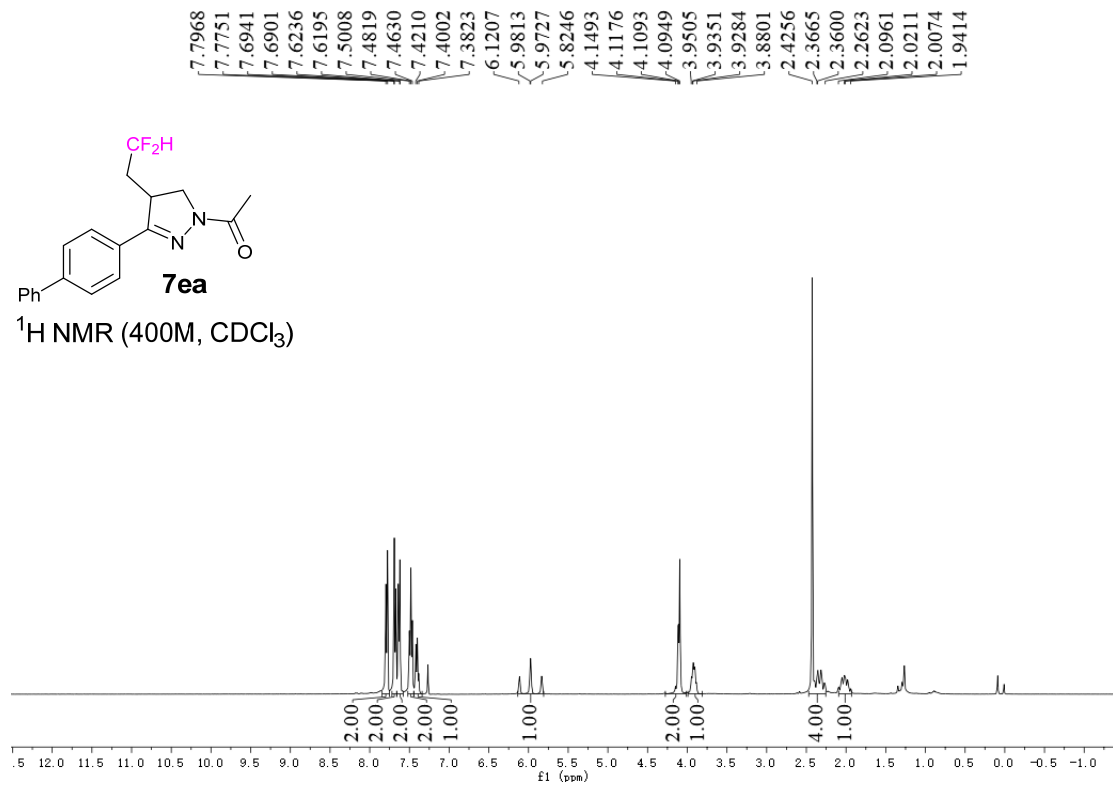

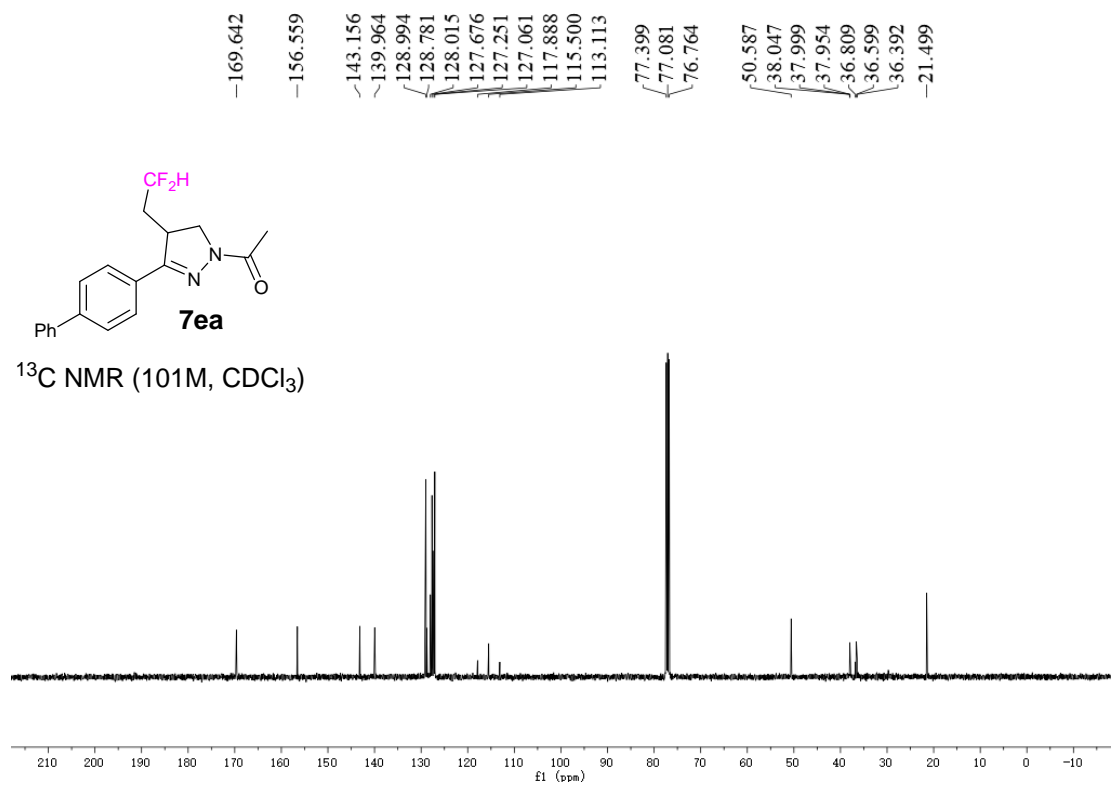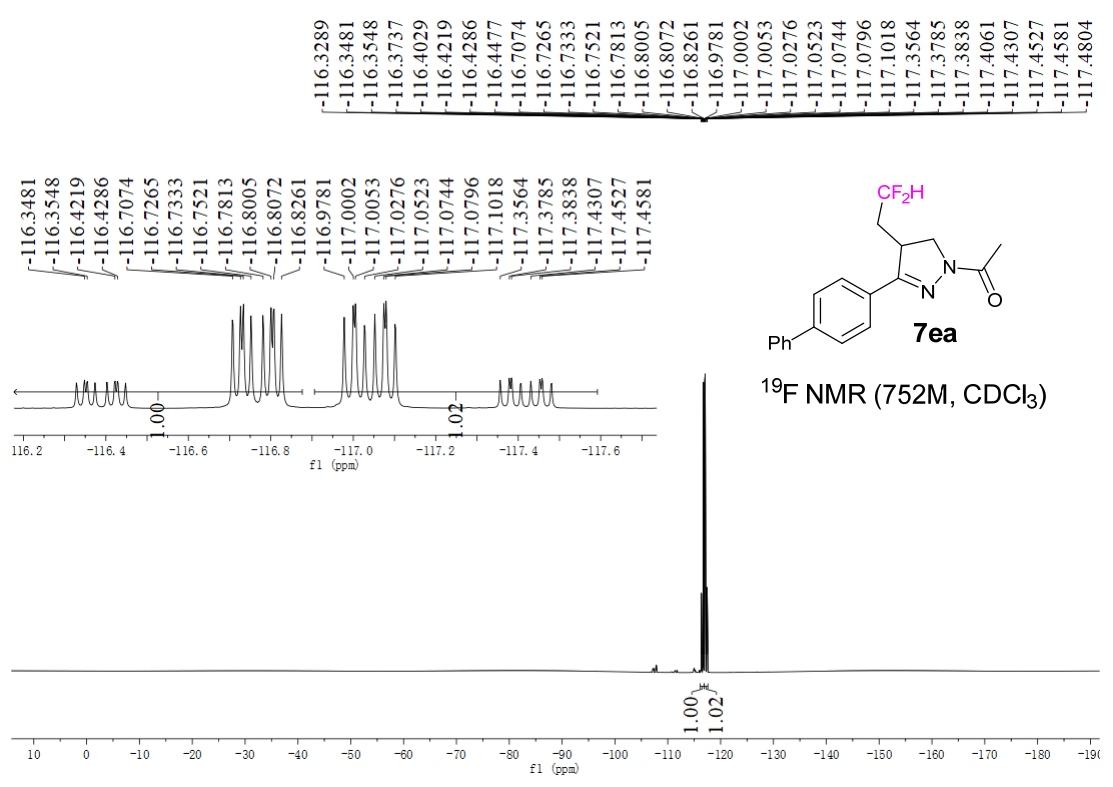

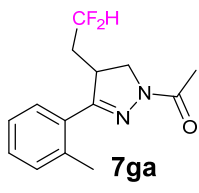

$^1\text{H NMR}$  (400M,  $\text{CDCl}_3$ )

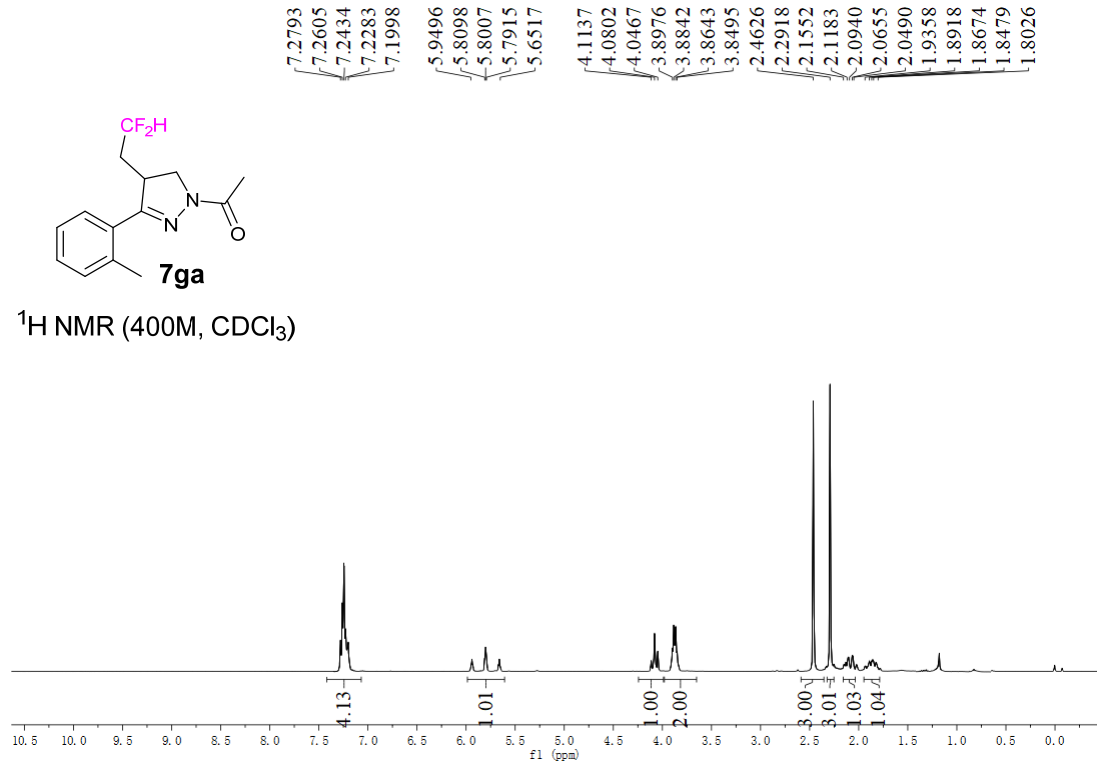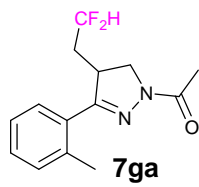

$^{13}\text{C NMR}$  (101M,  $\text{CDCl}_3$ )

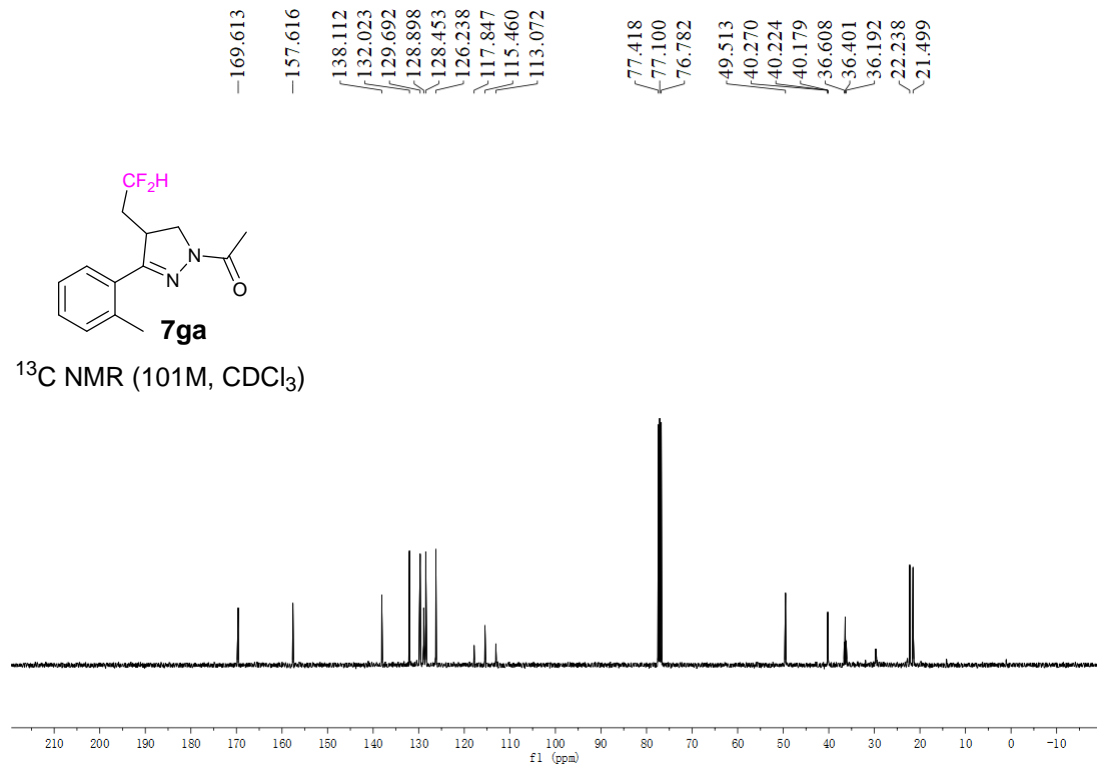

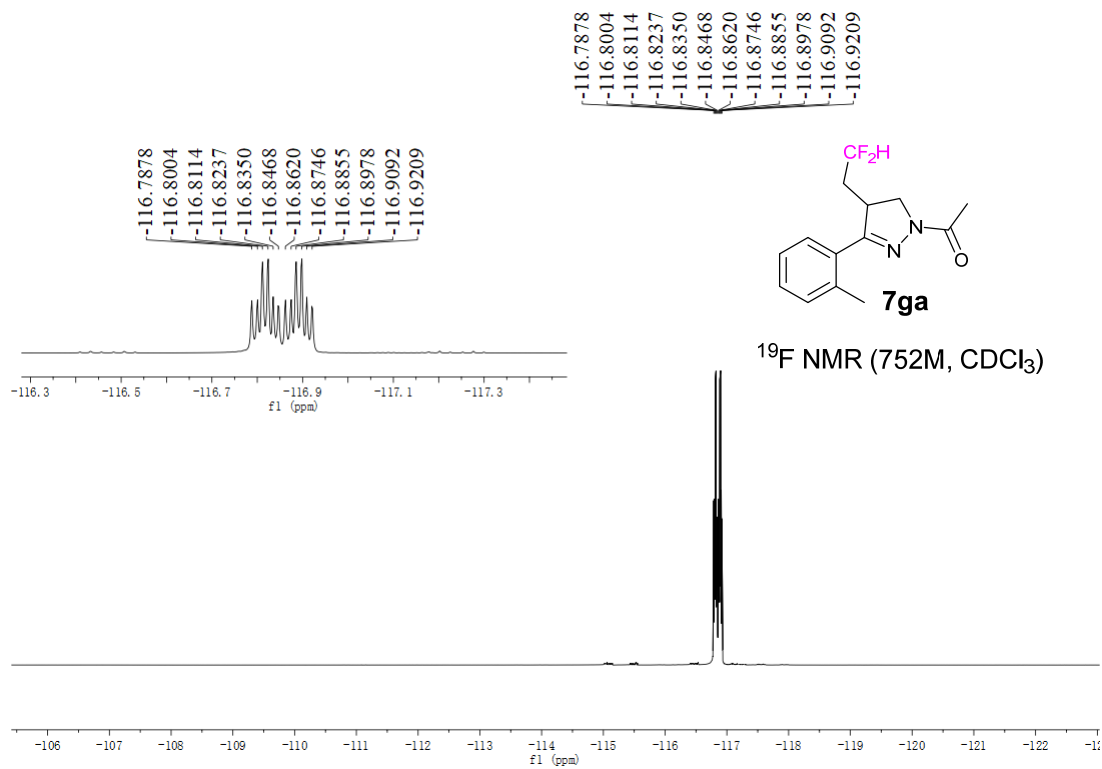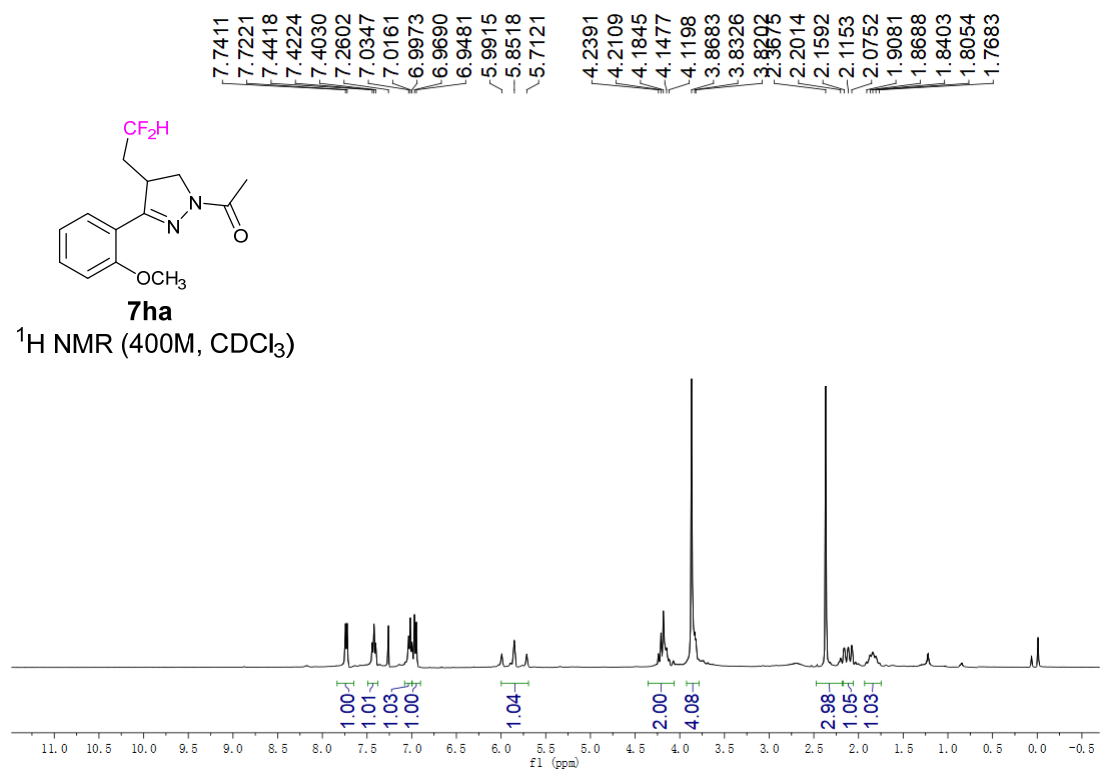

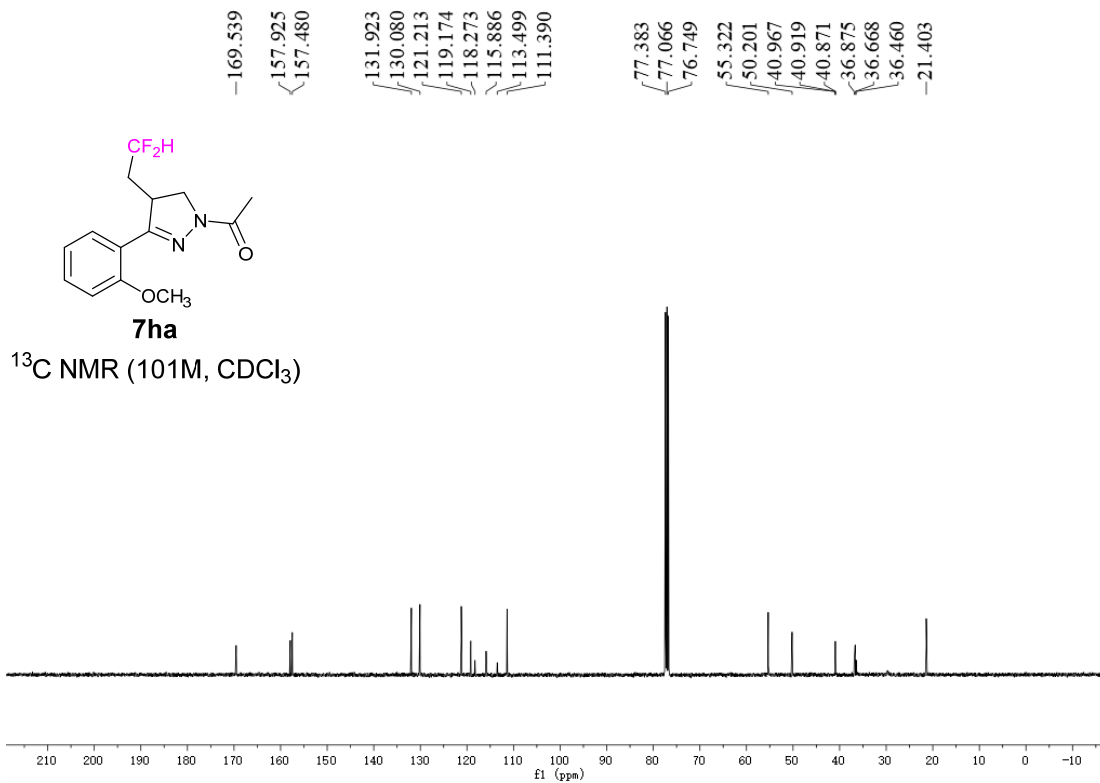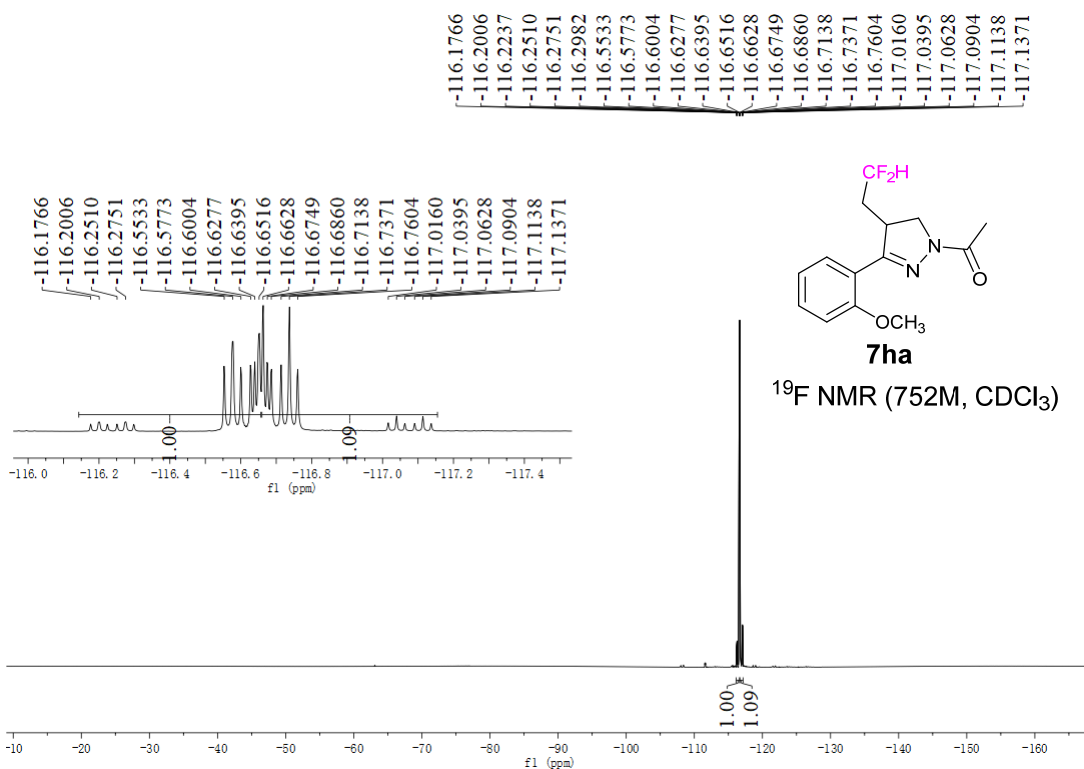

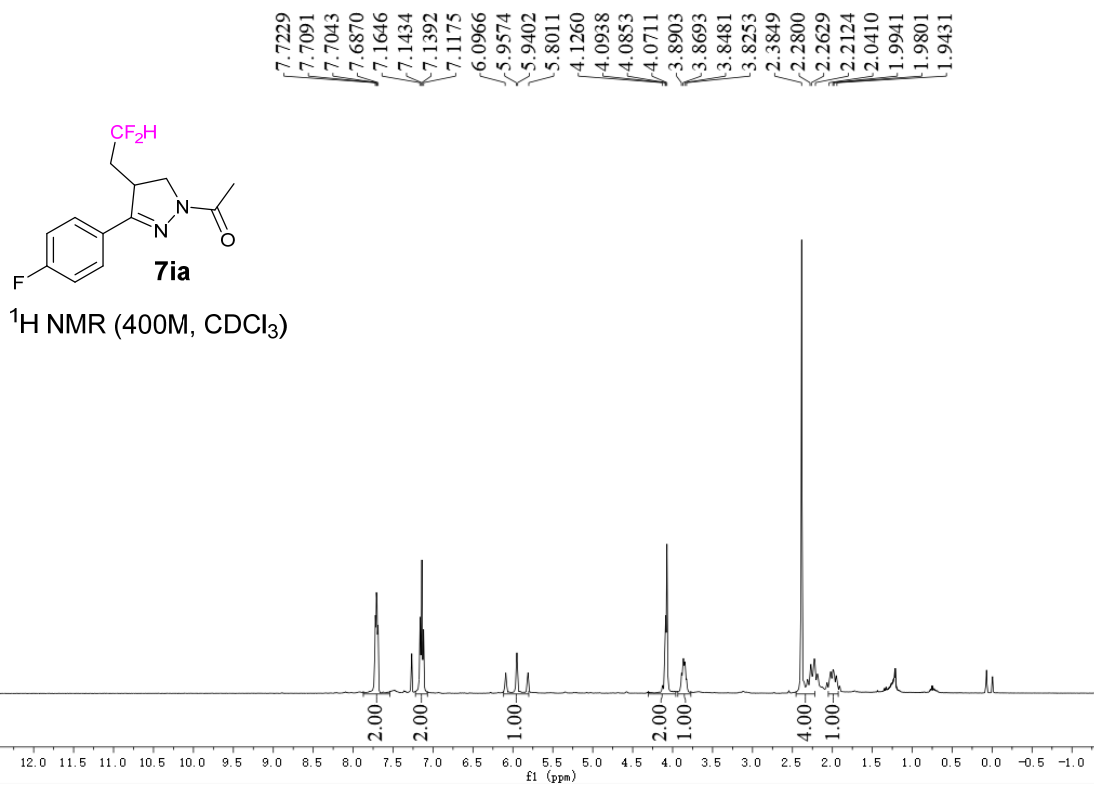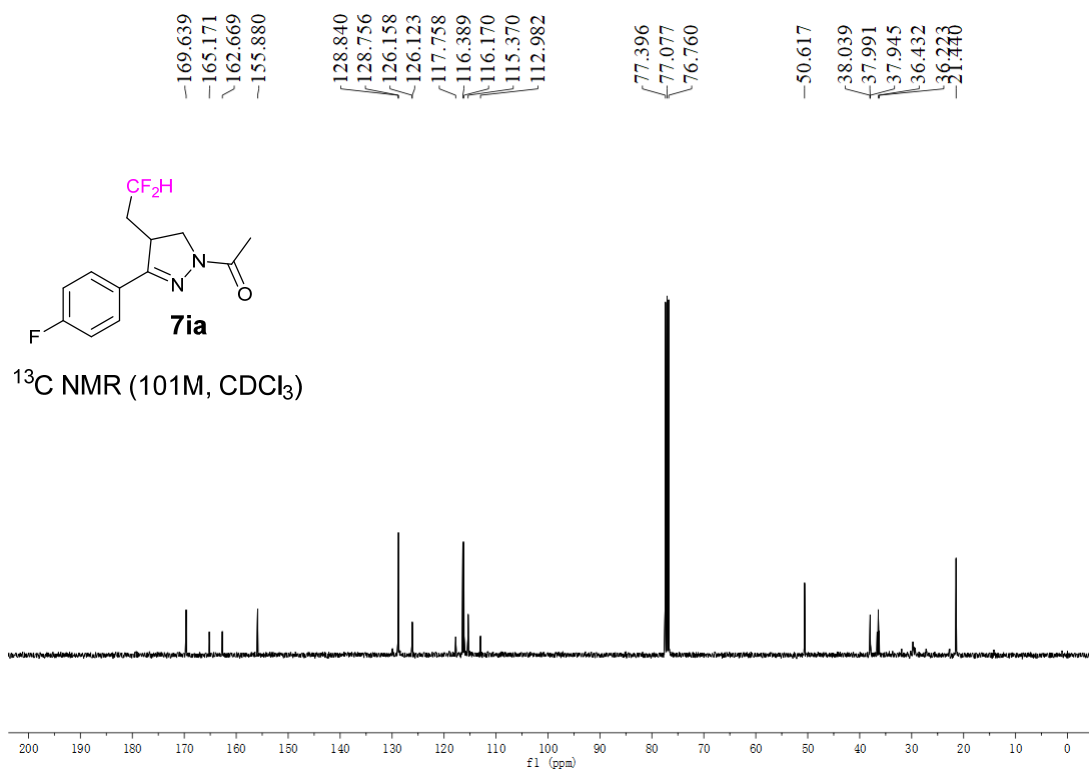

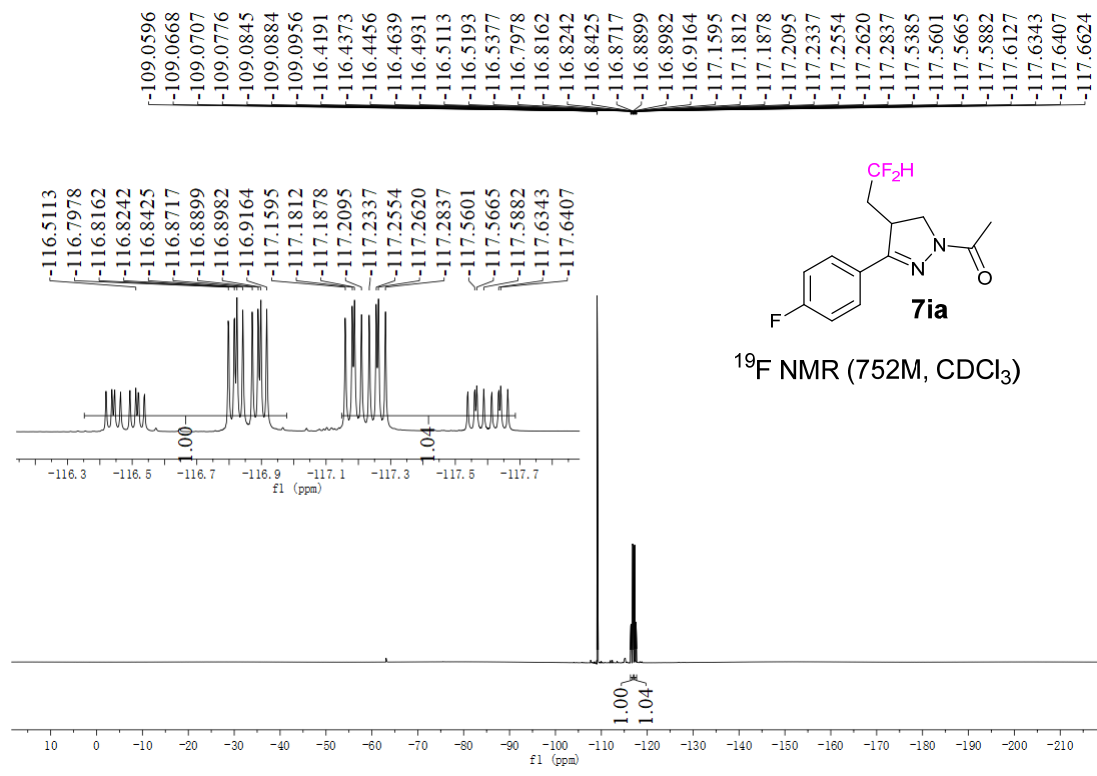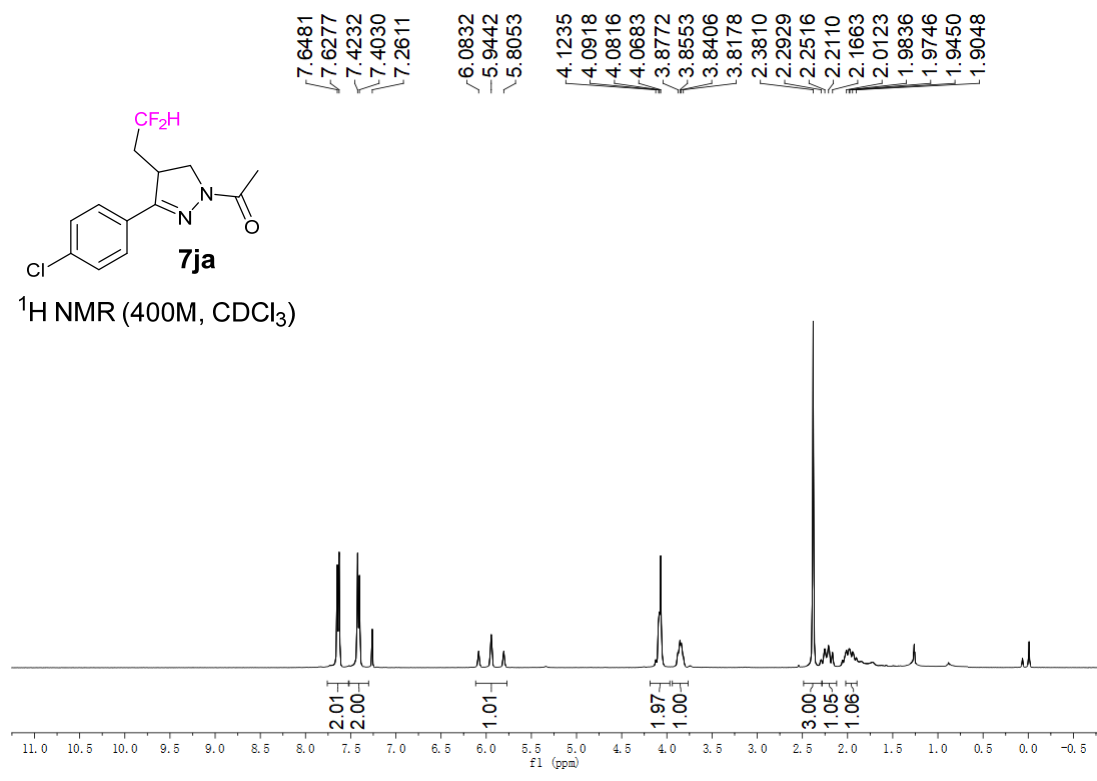

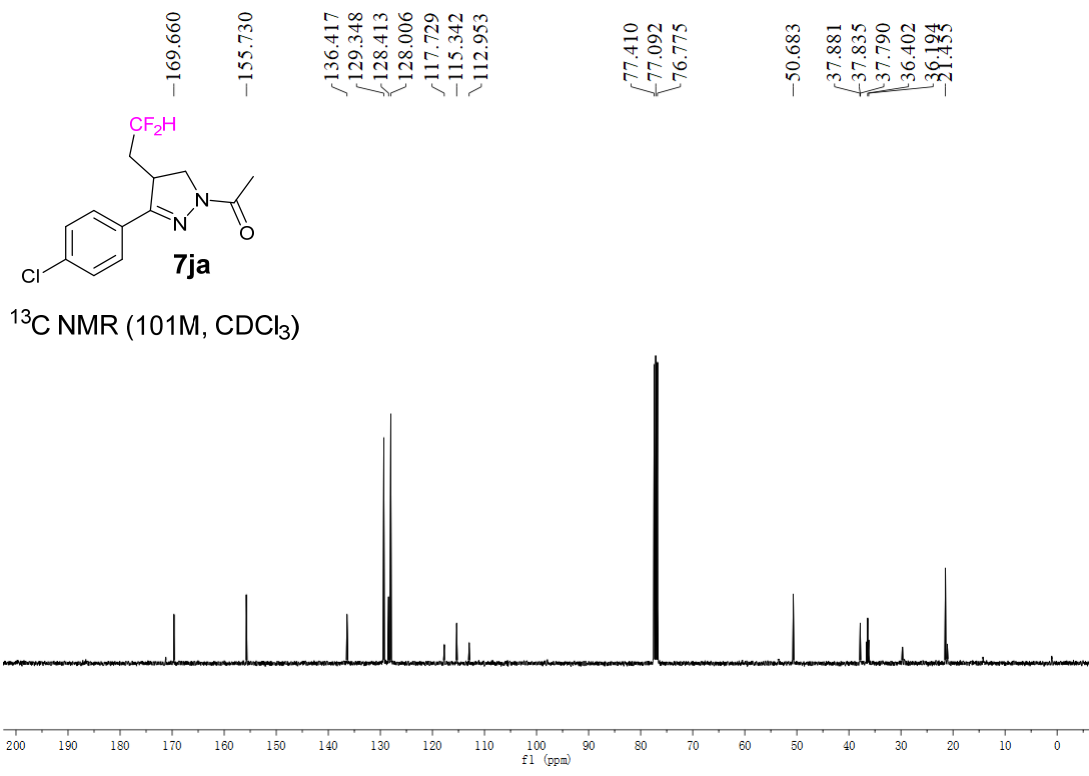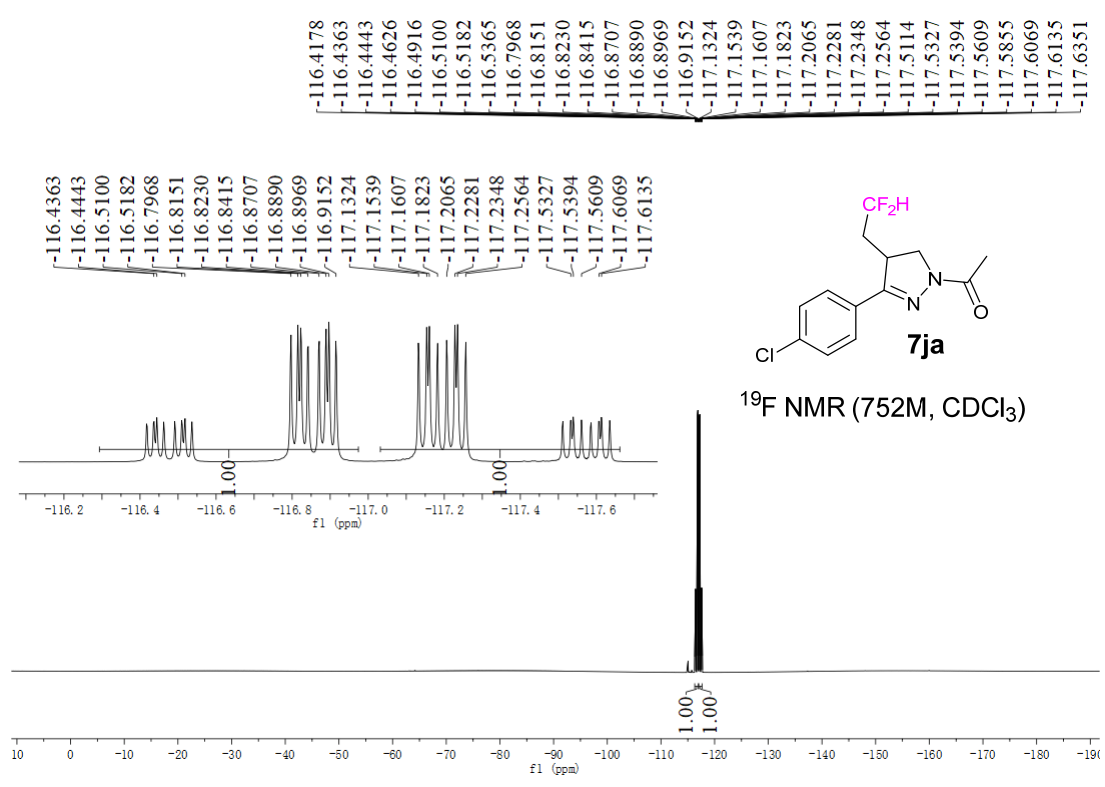



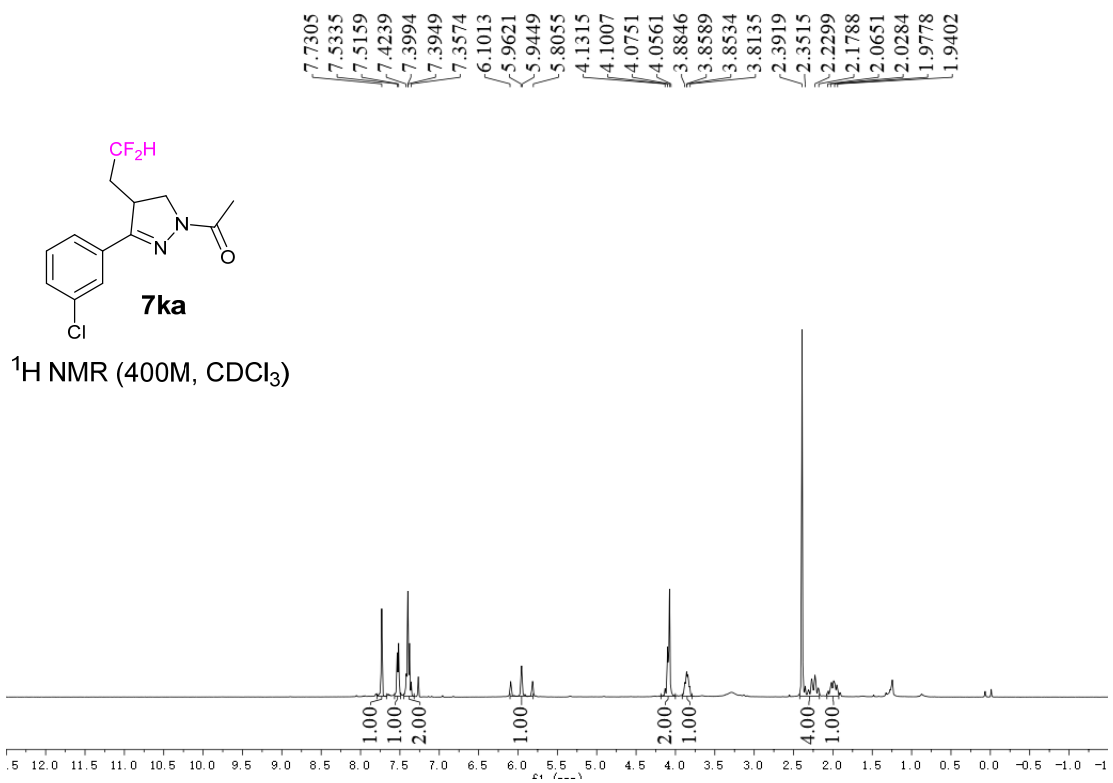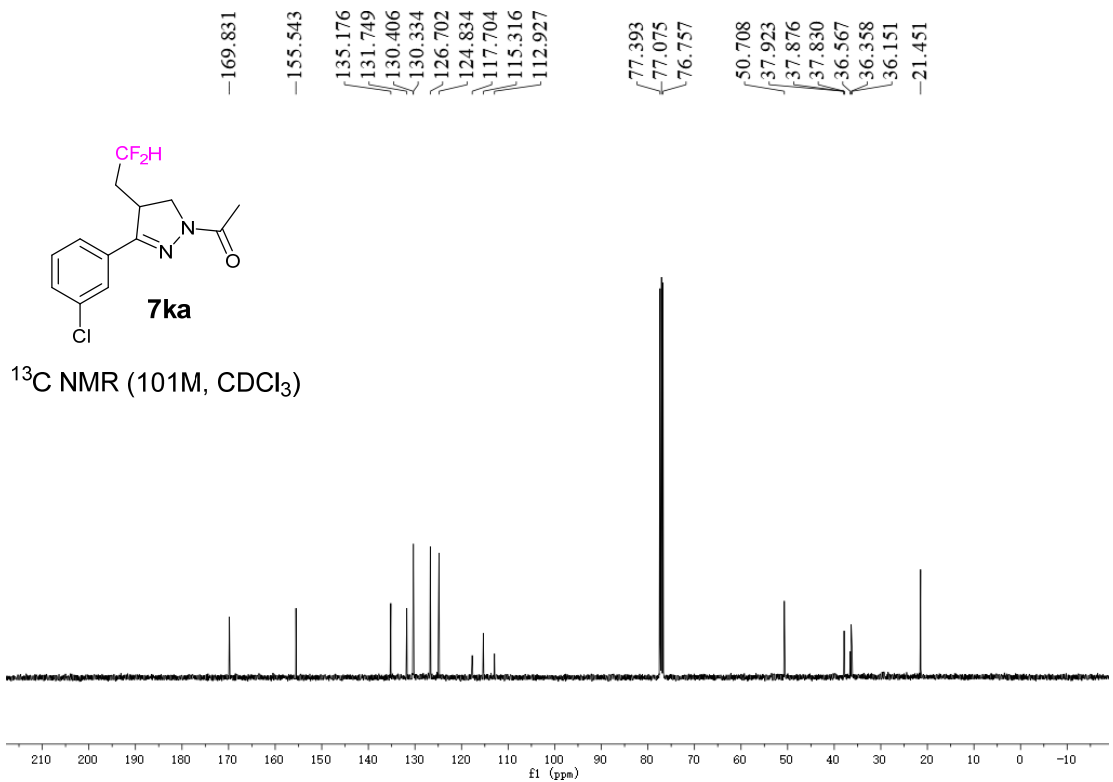

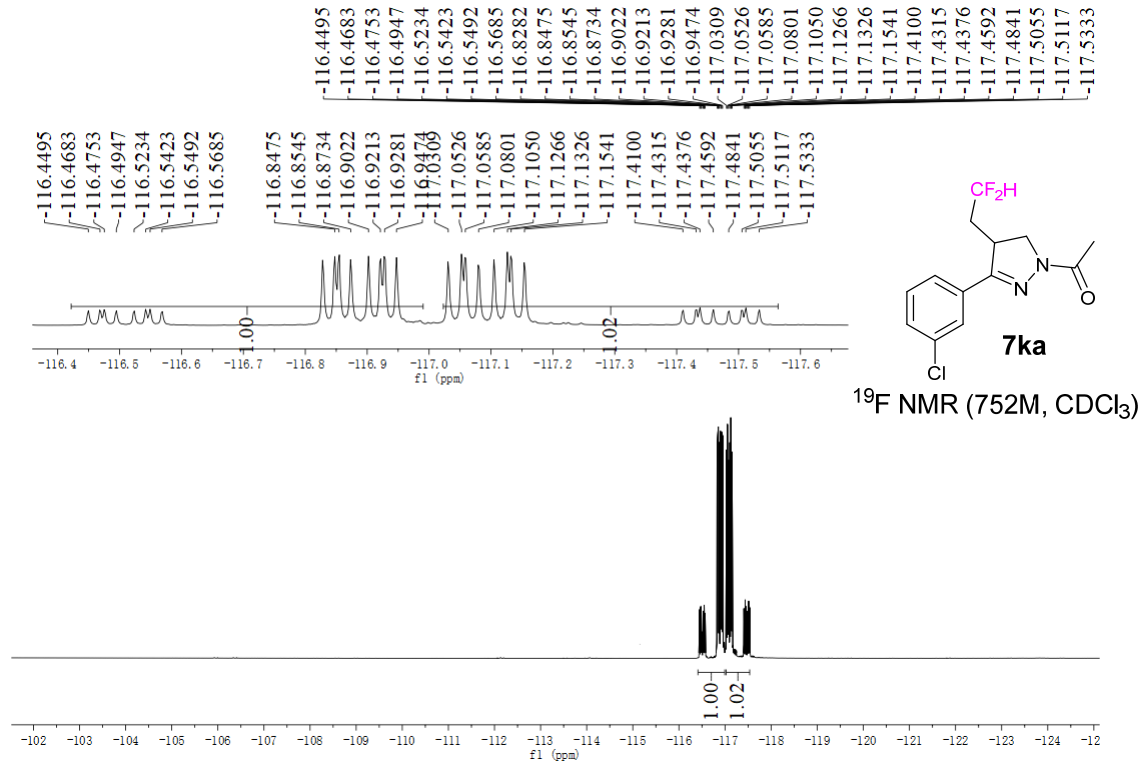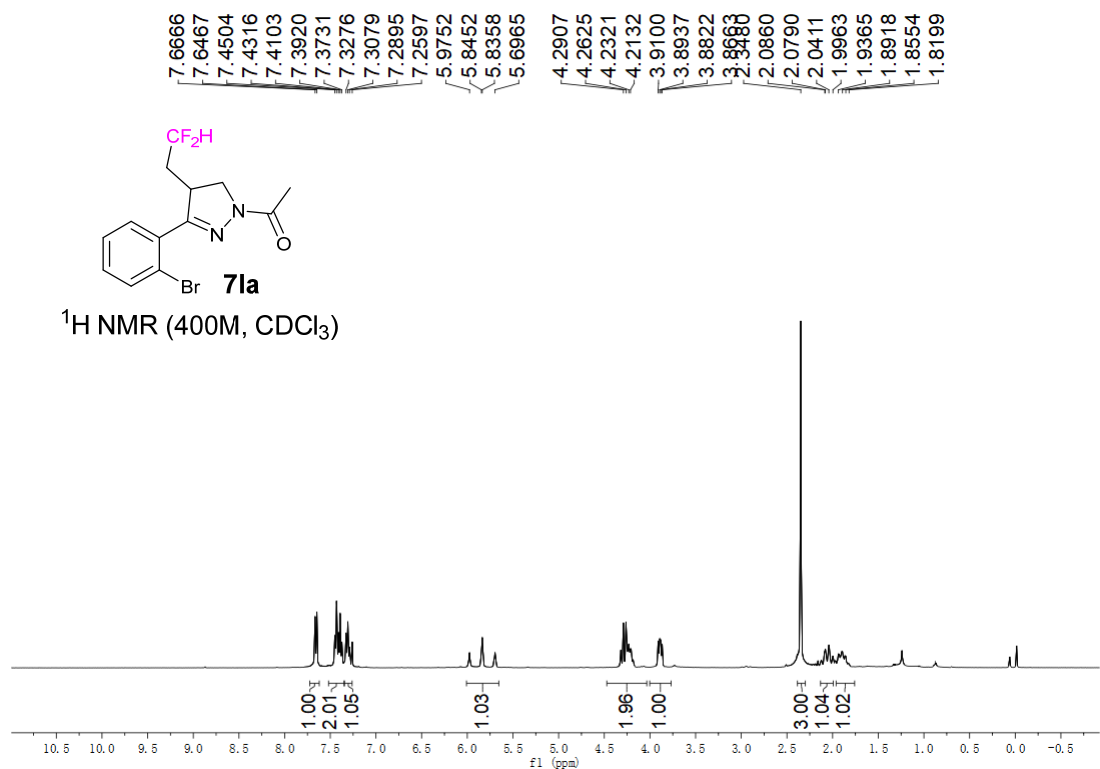

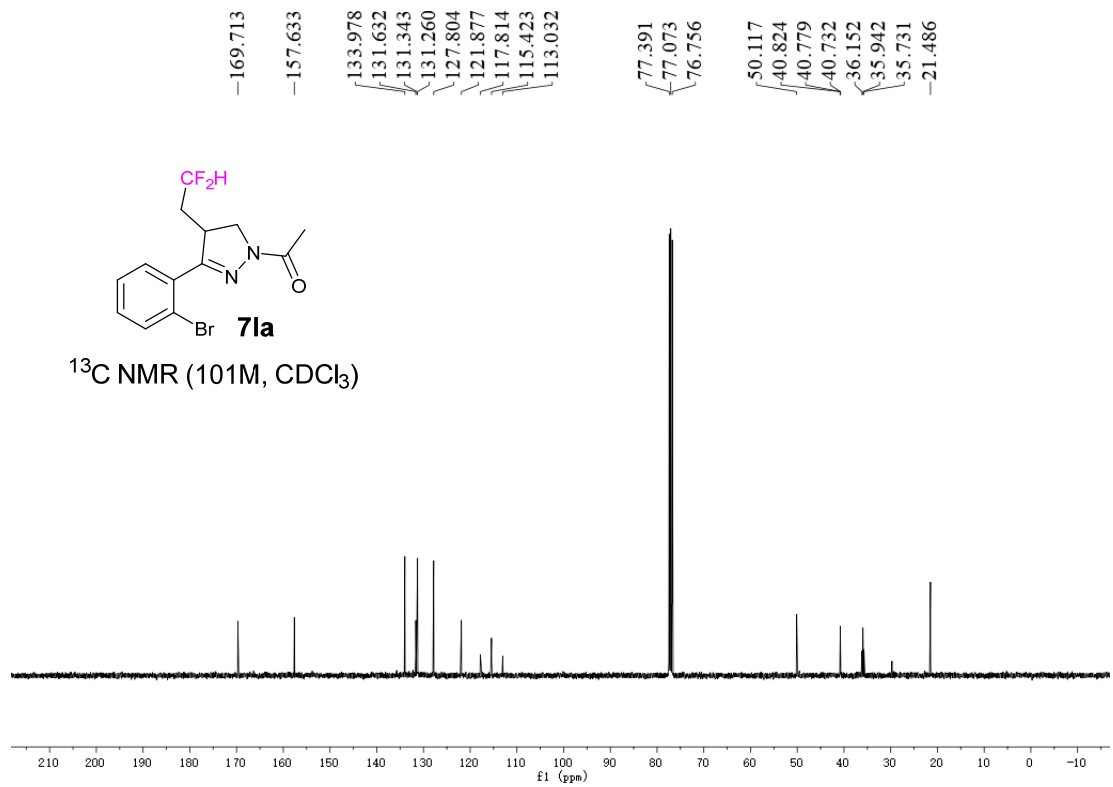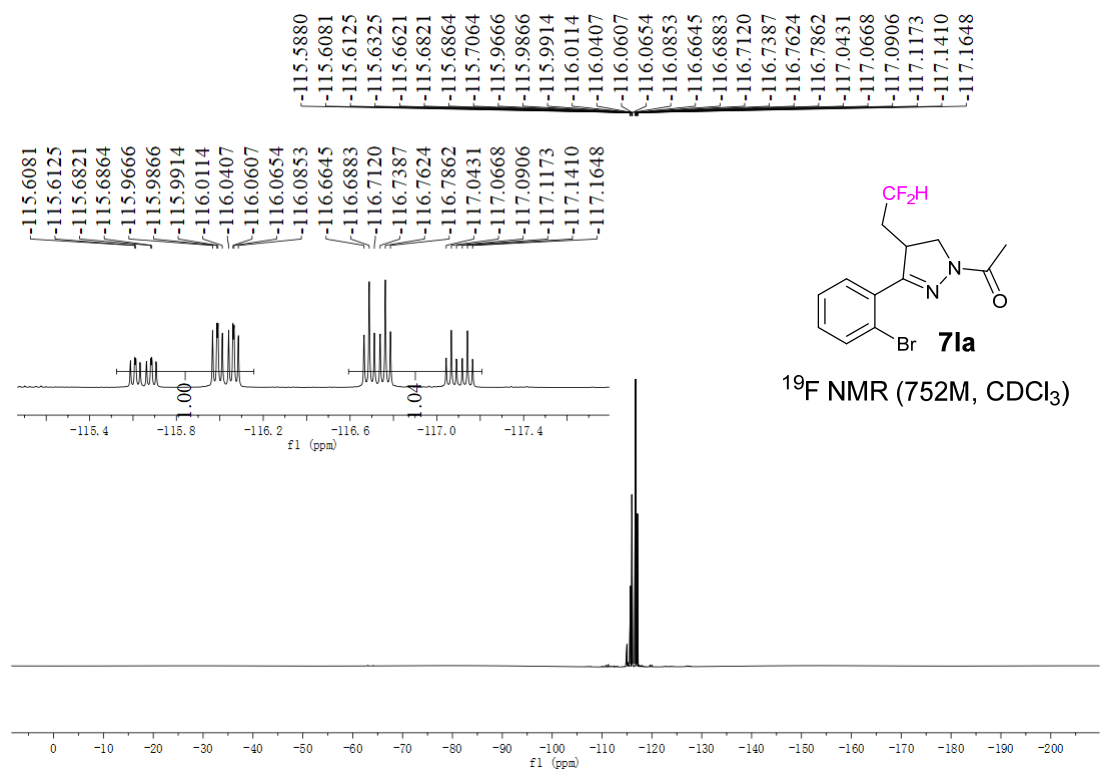

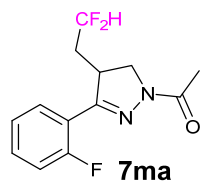

<sup>1</sup>H NMR (400M, CDCl<sub>3</sub>)

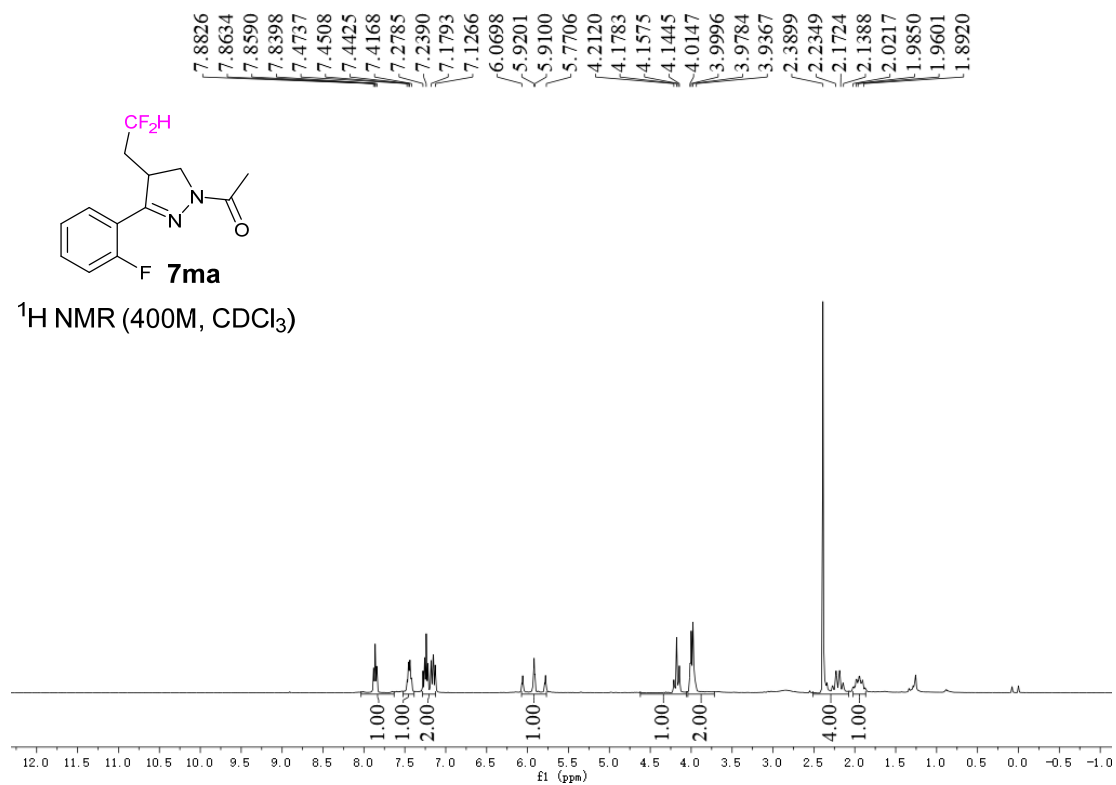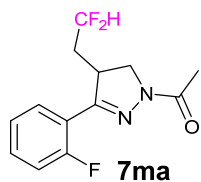

<sup>13</sup>C NMR (101M, CDCl<sub>3</sub>)

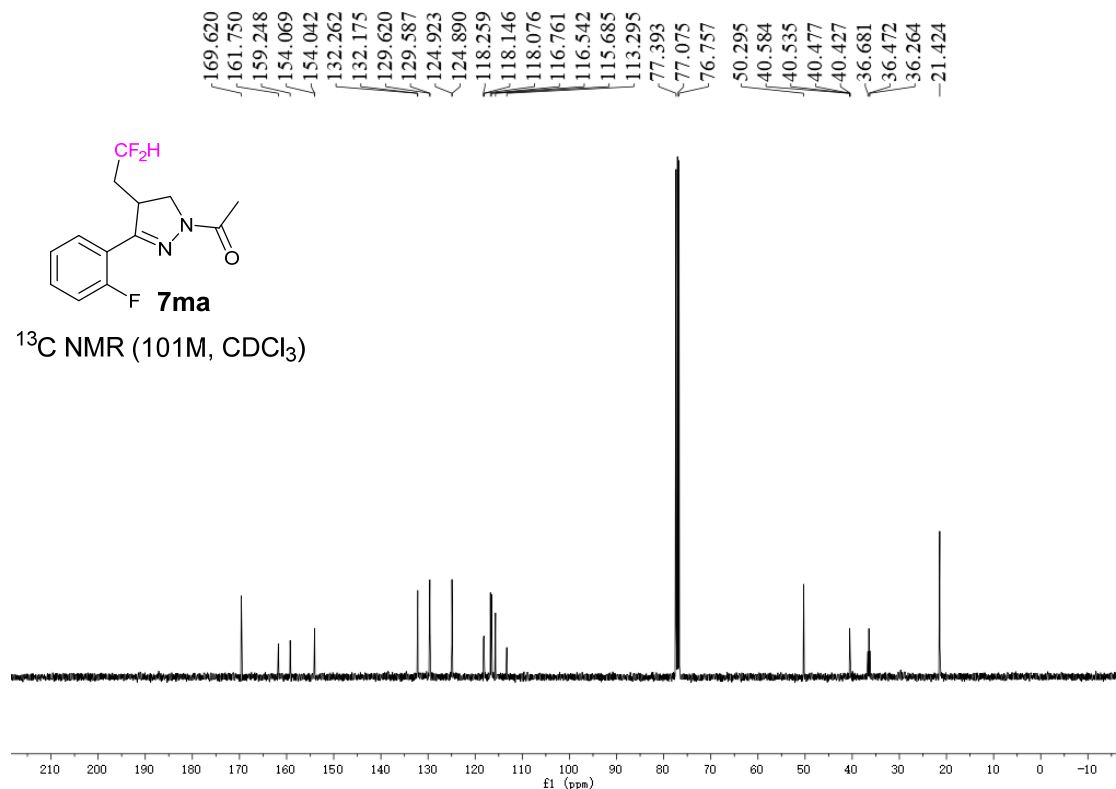

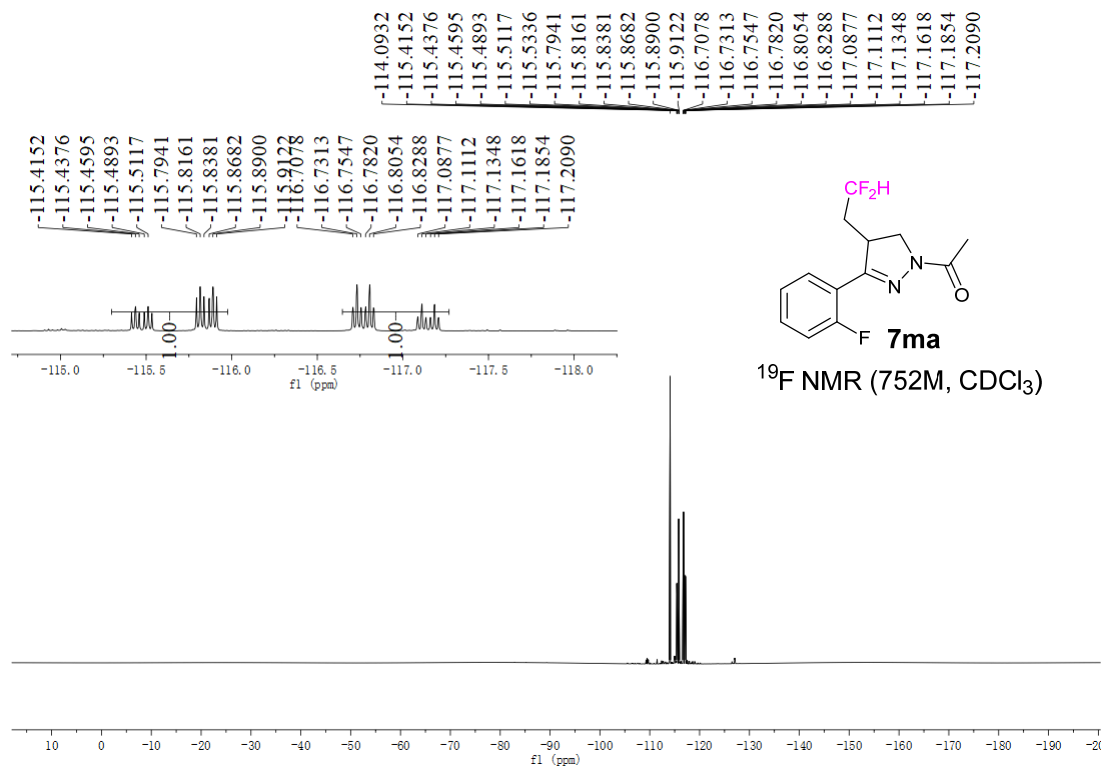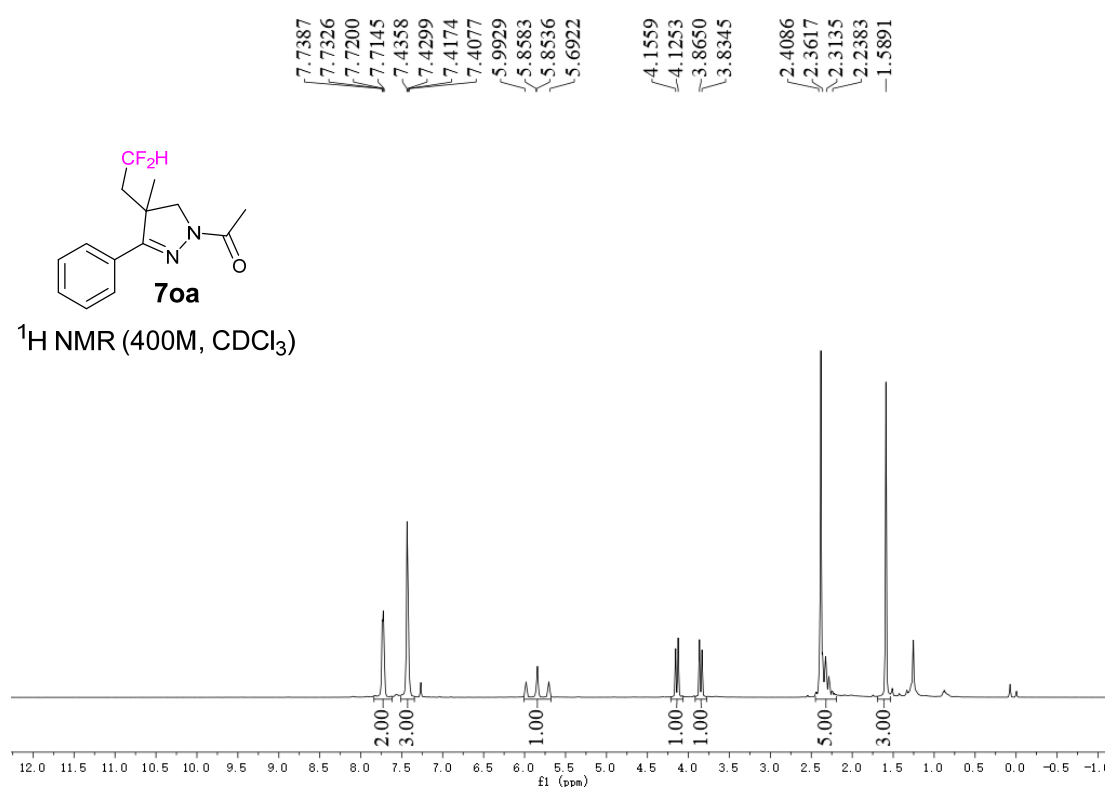

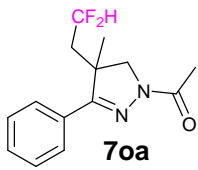

<sup>13</sup>C NMR (101M, CDCl<sub>3</sub>)

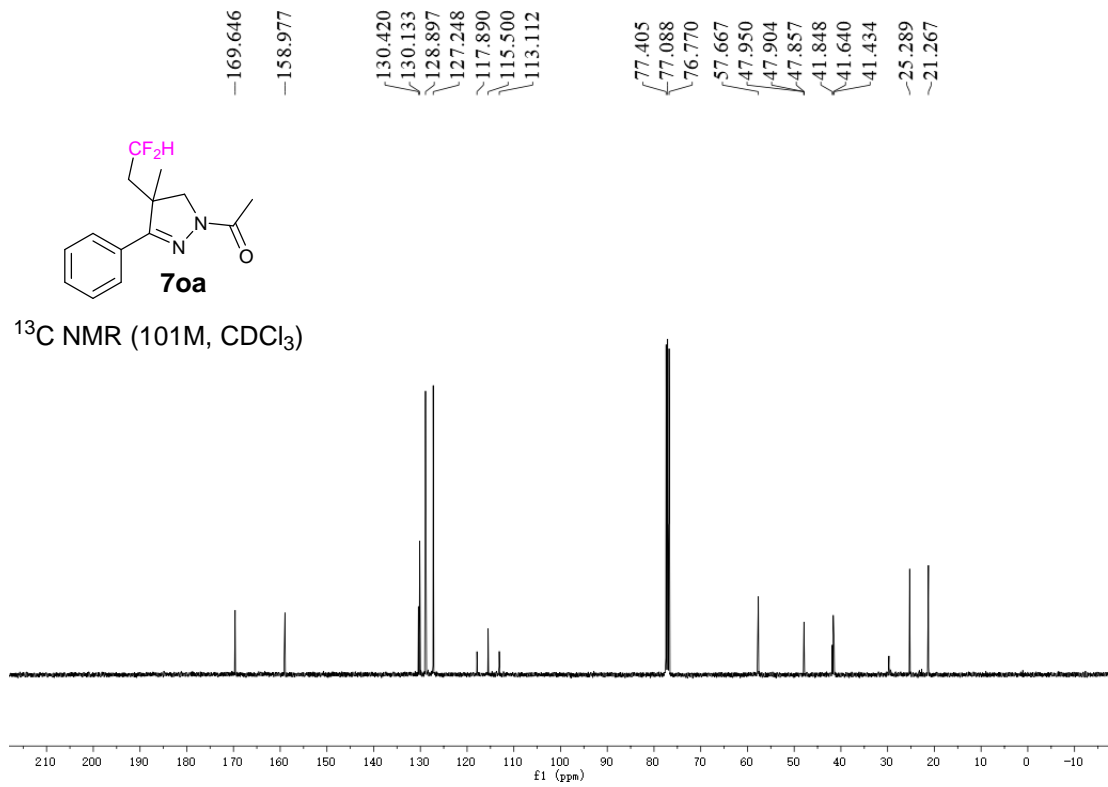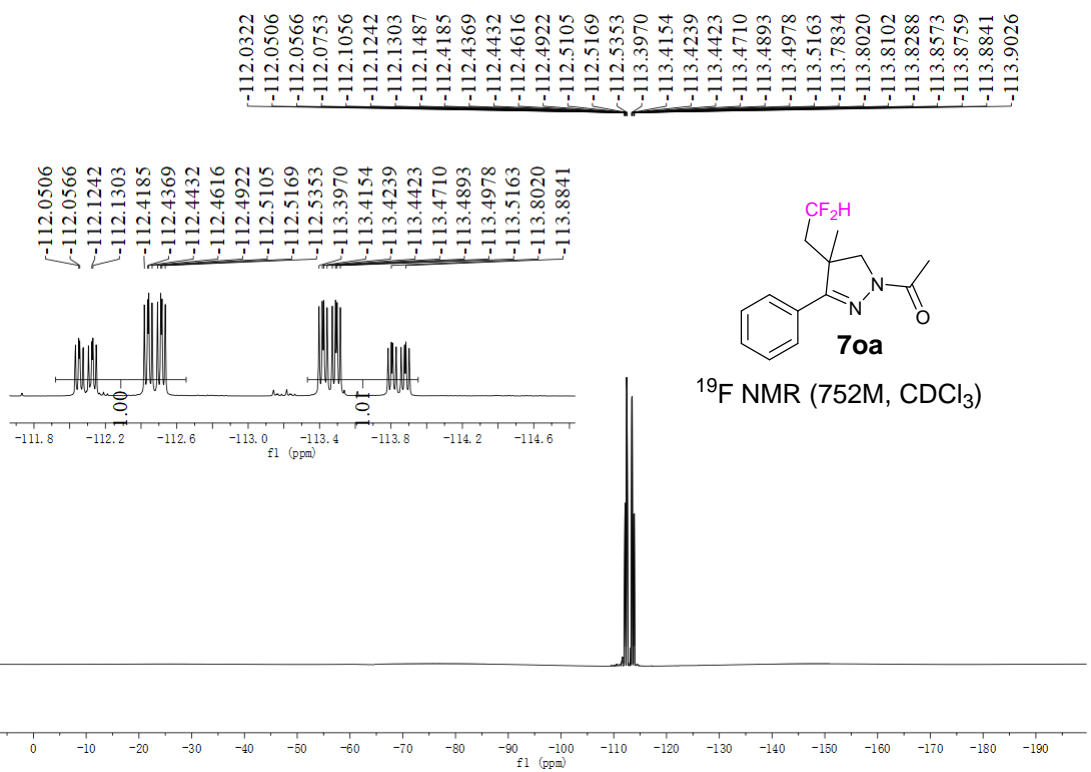

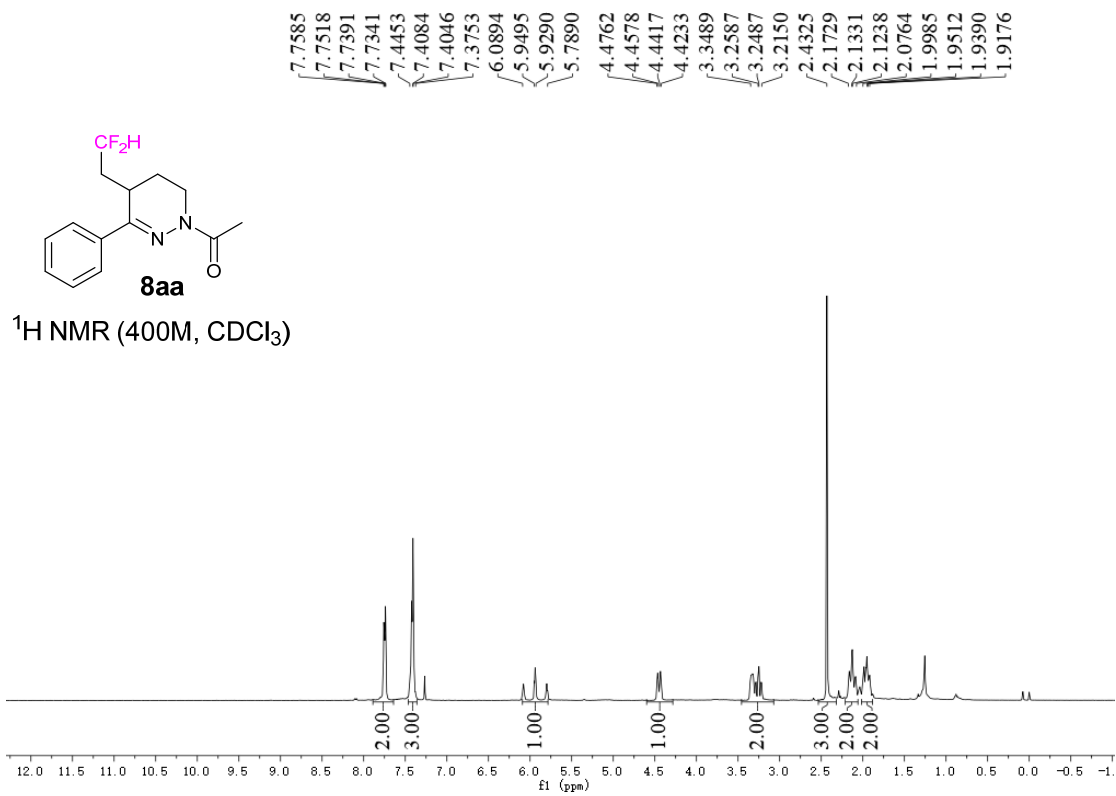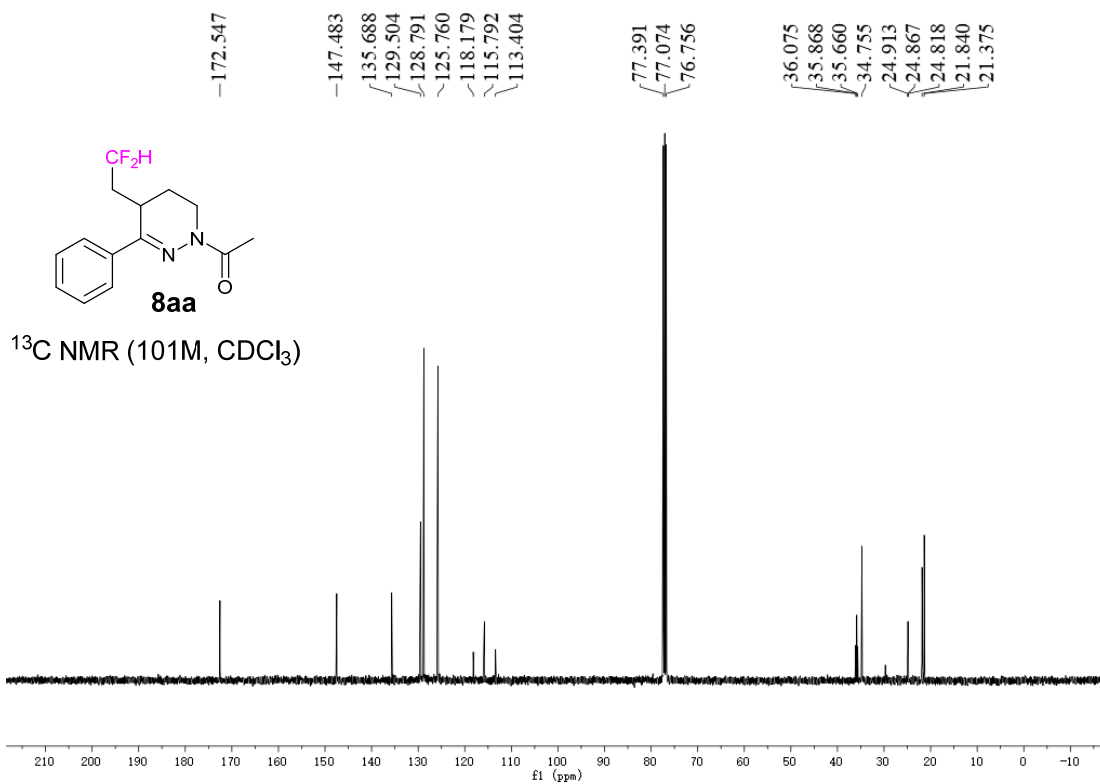

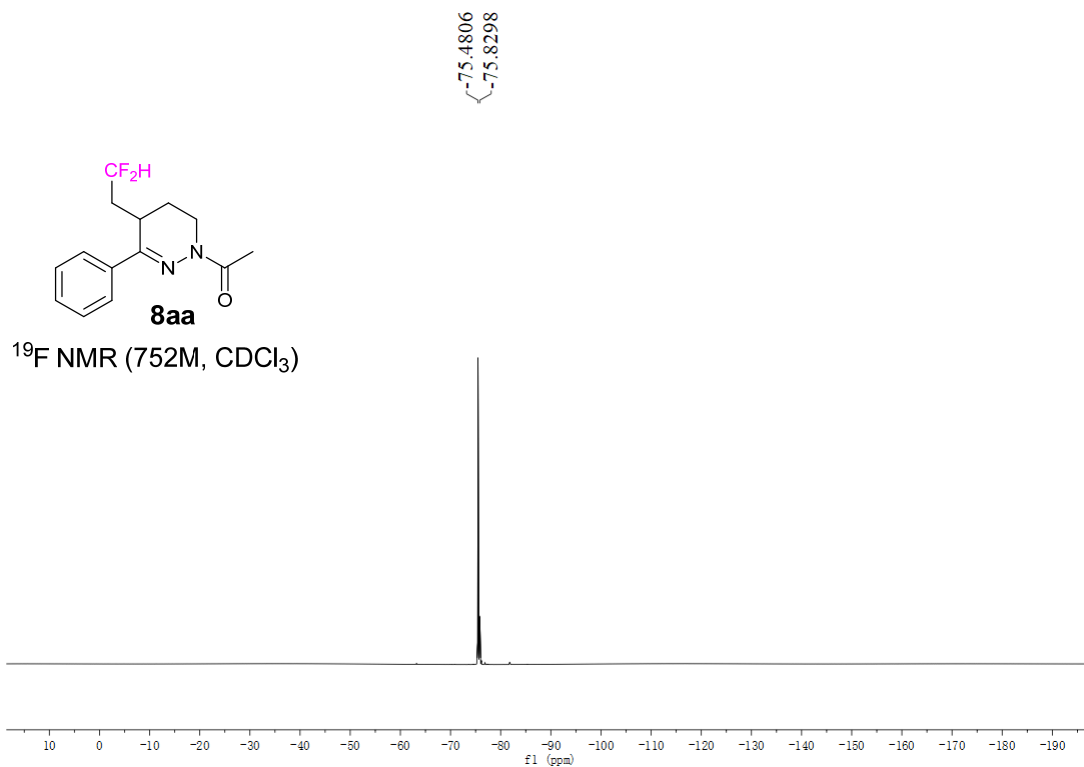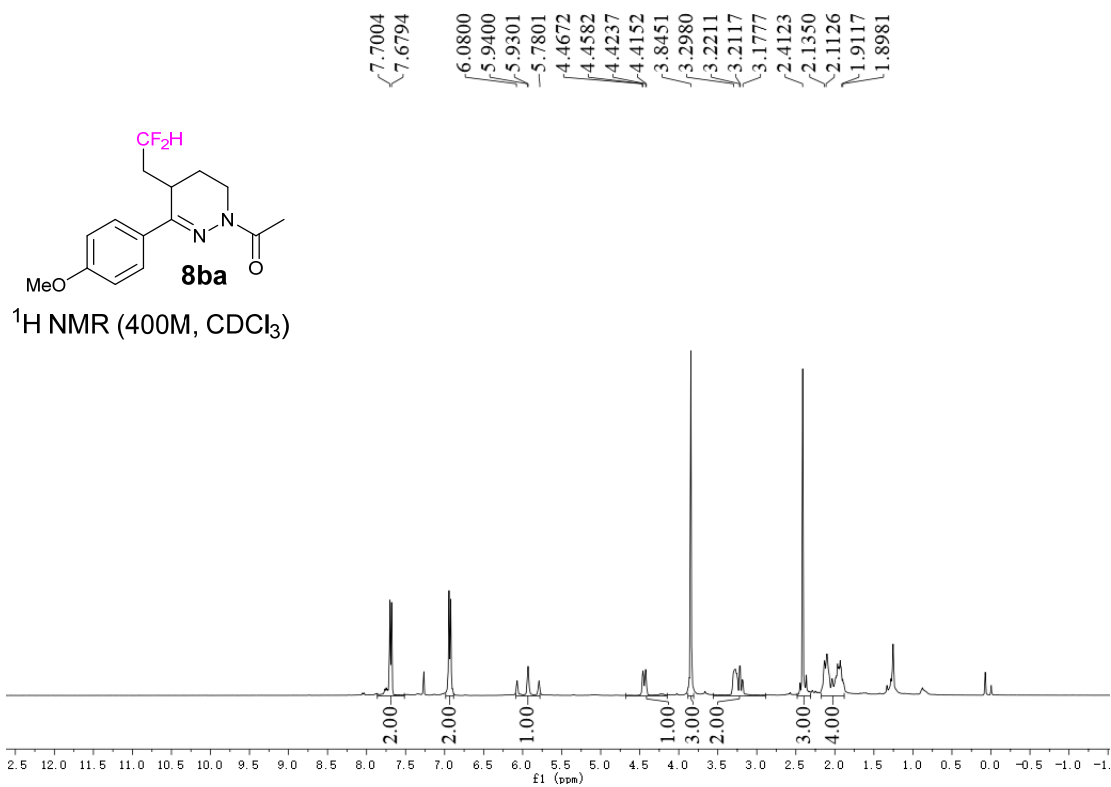



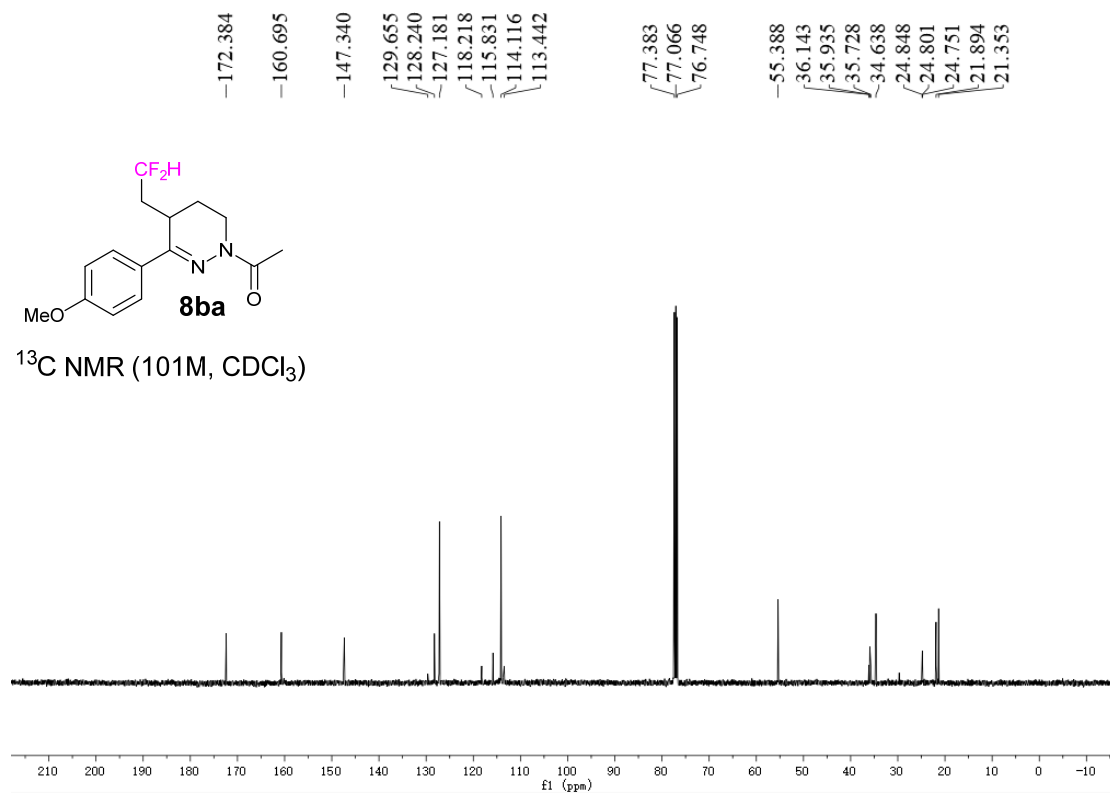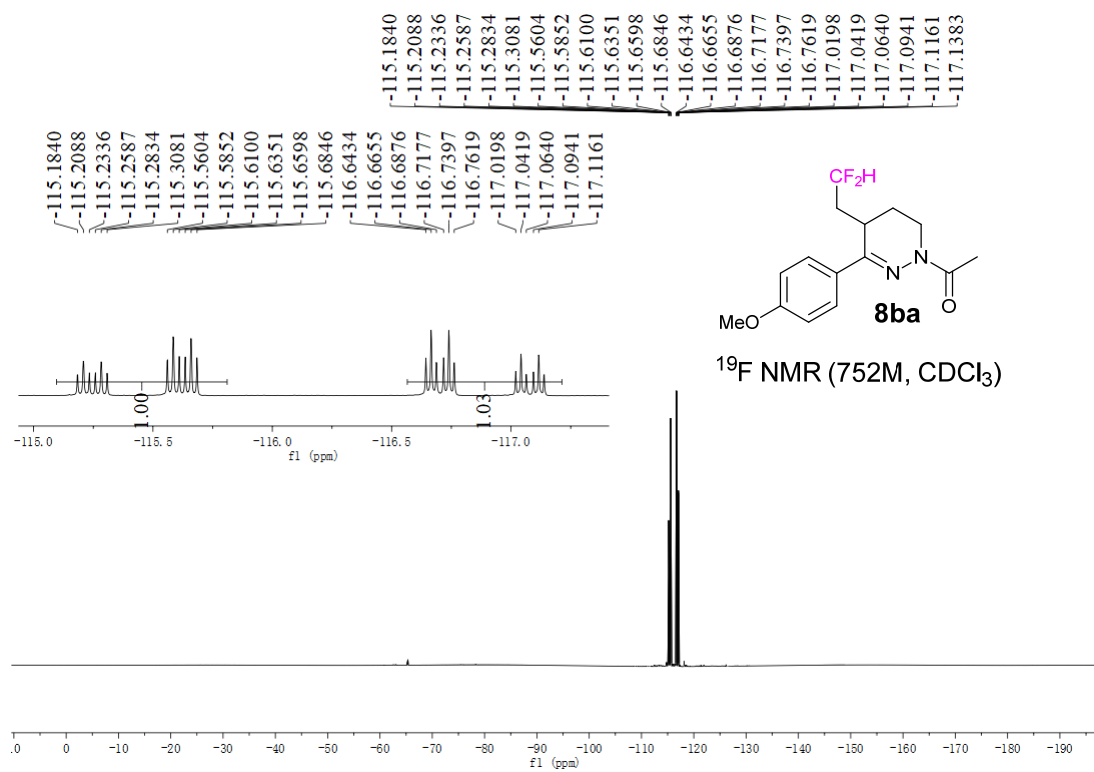

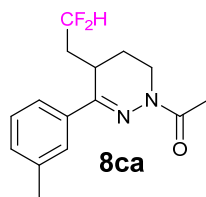

$^1\text{H}$  NMR (400M,  $\text{CDCl}_3$ )

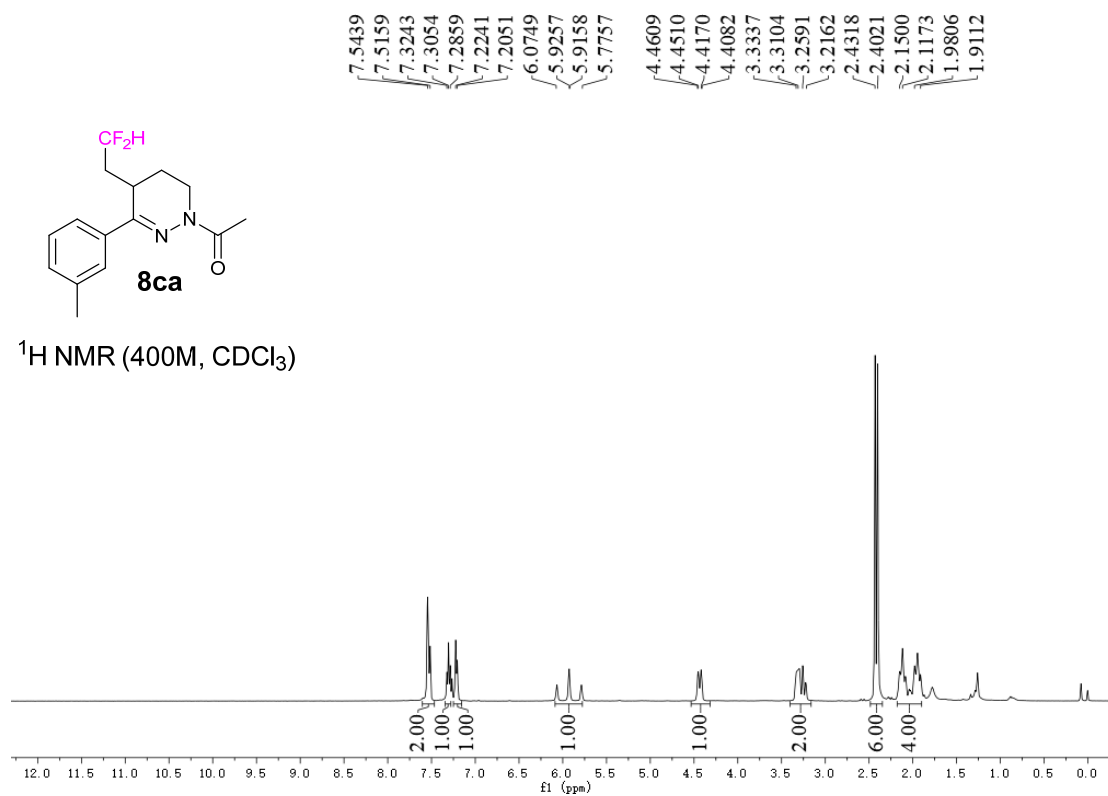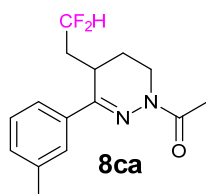

$^{13}\text{C}$  NMR (101M,  $\text{CDCl}_3$ )

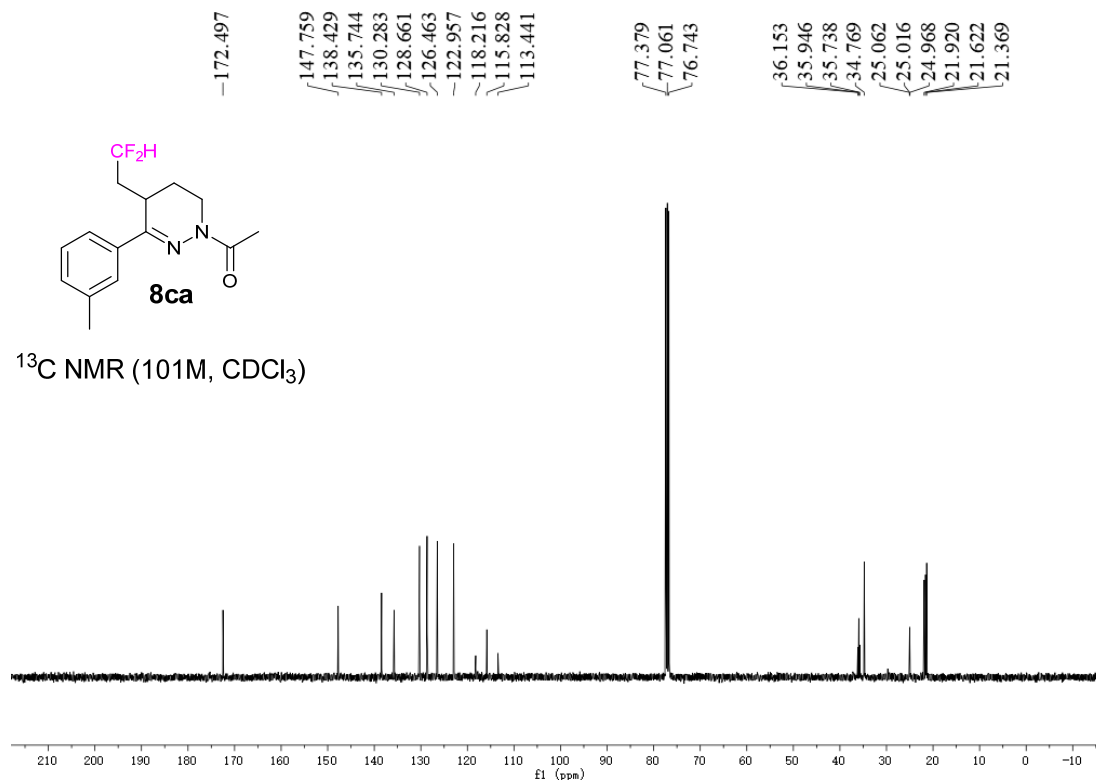

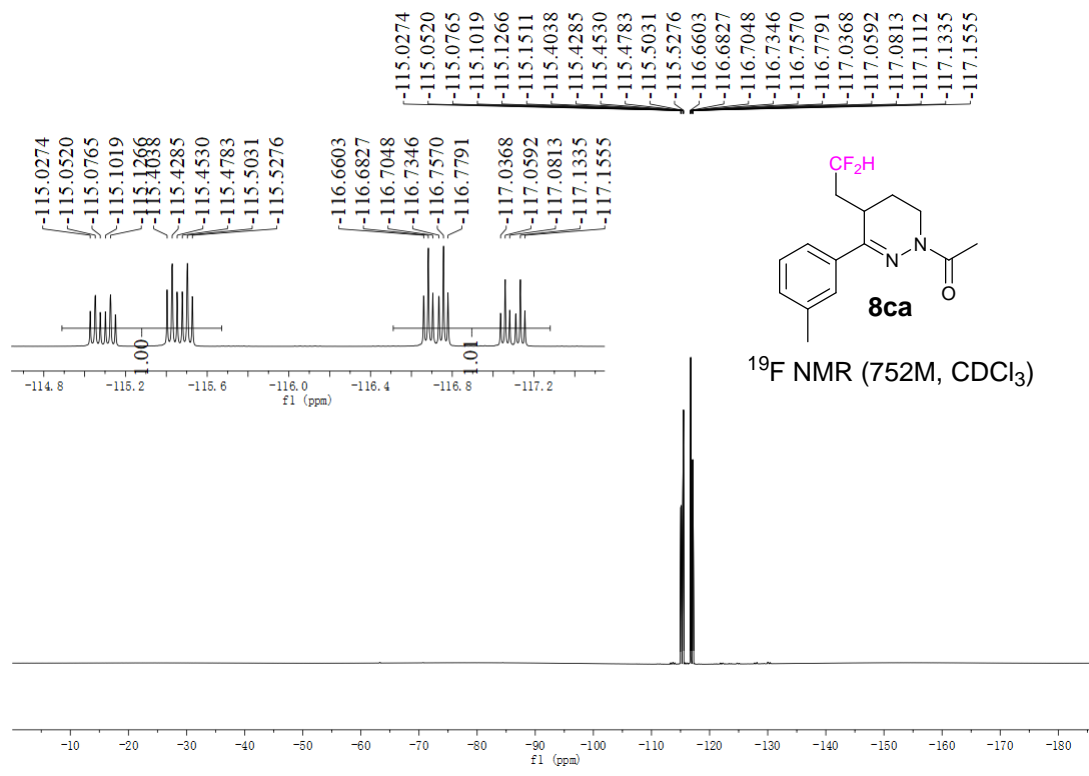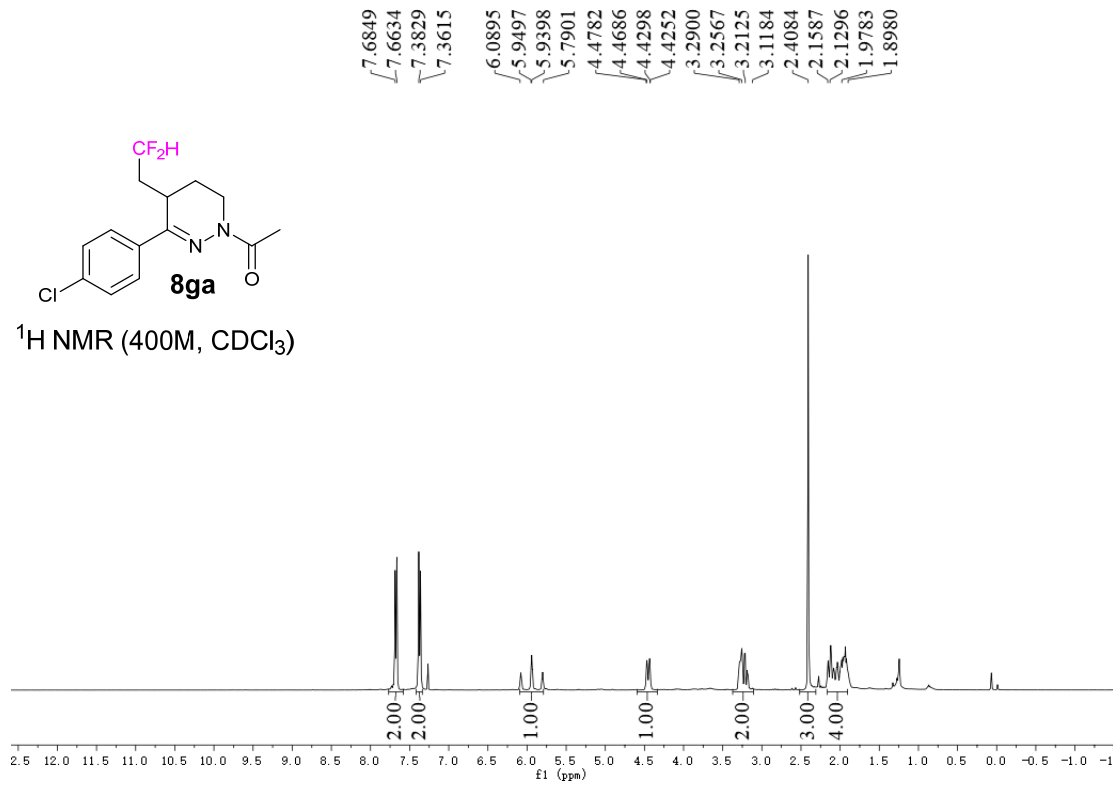

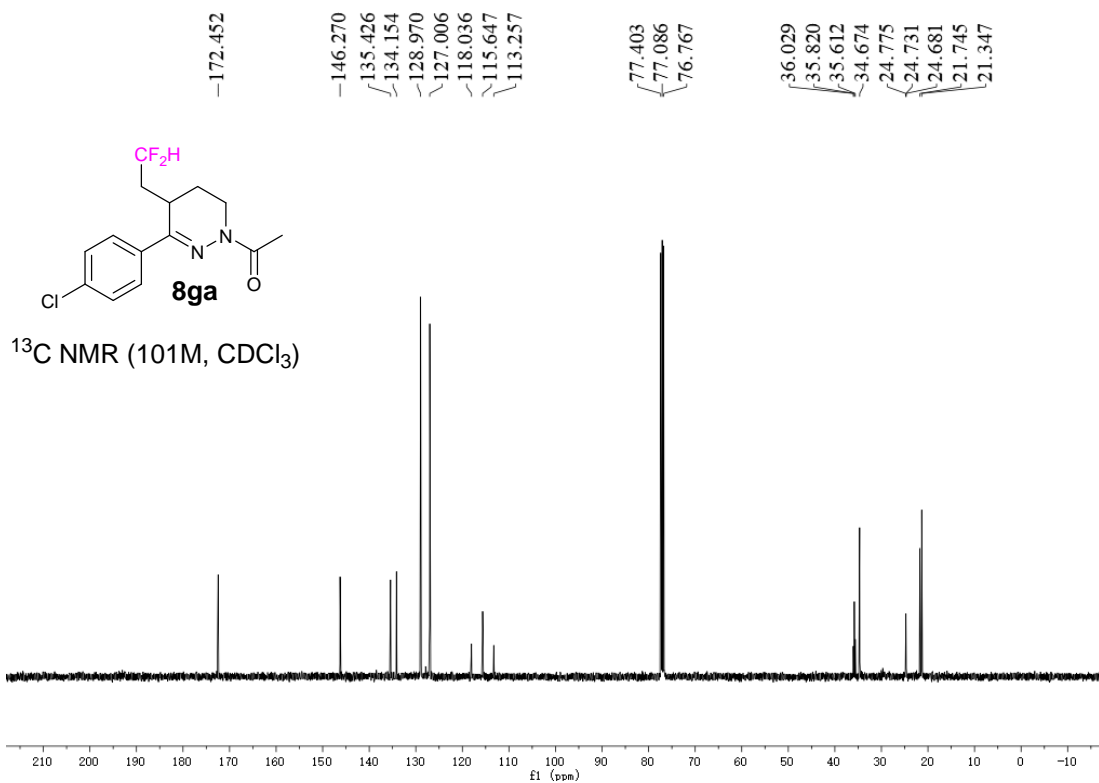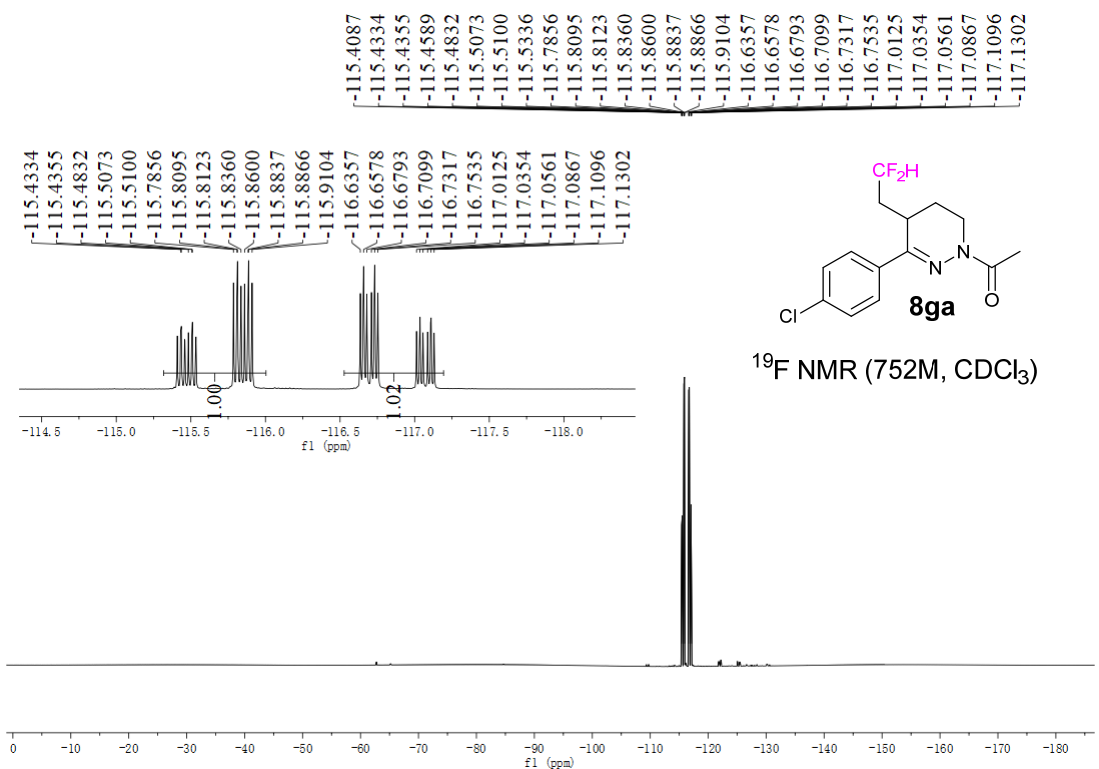

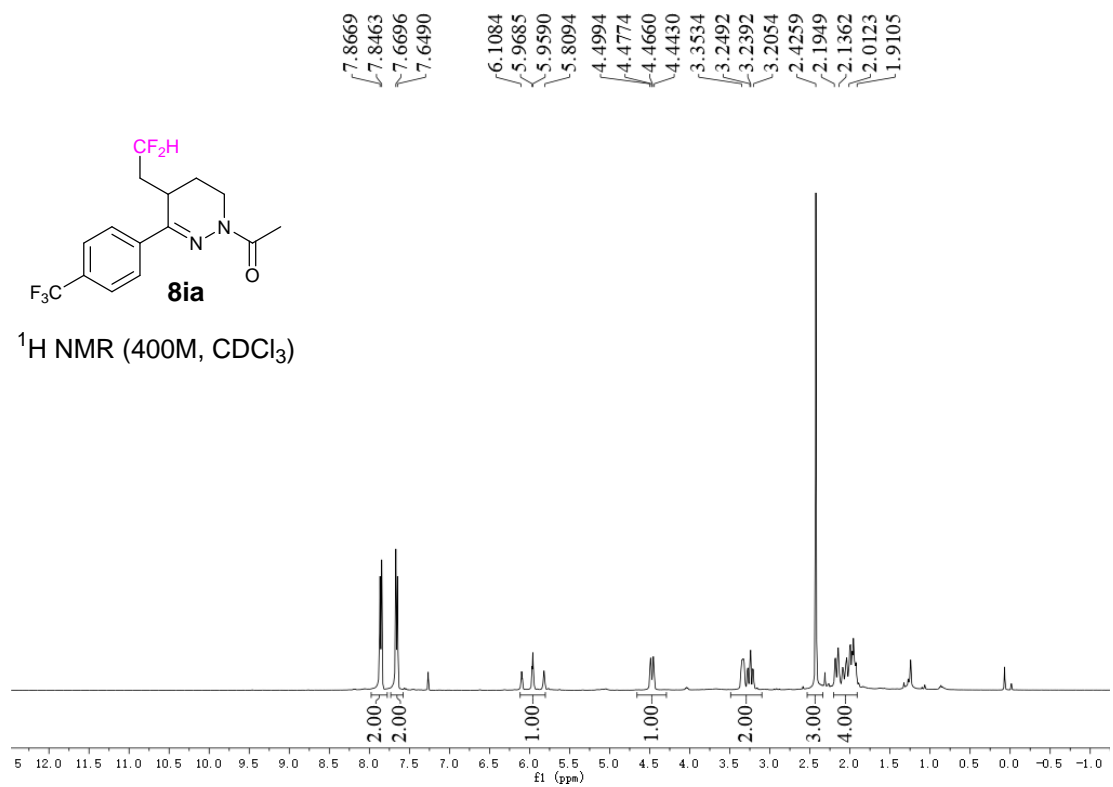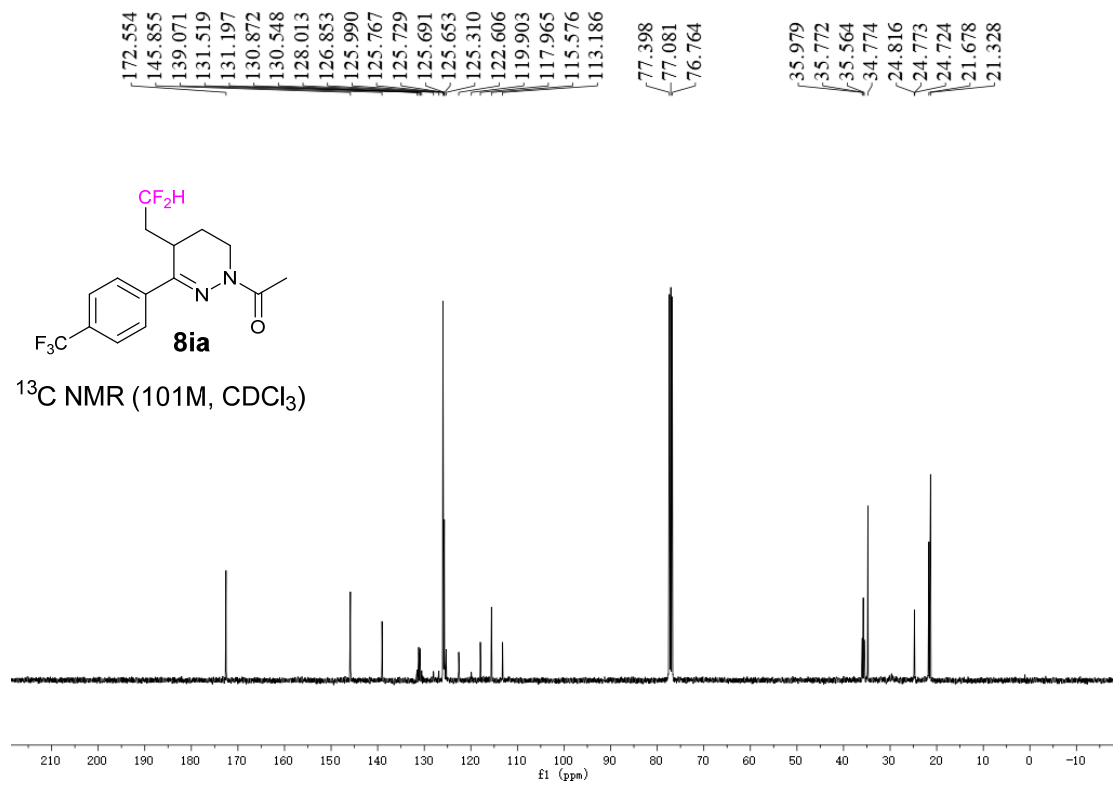

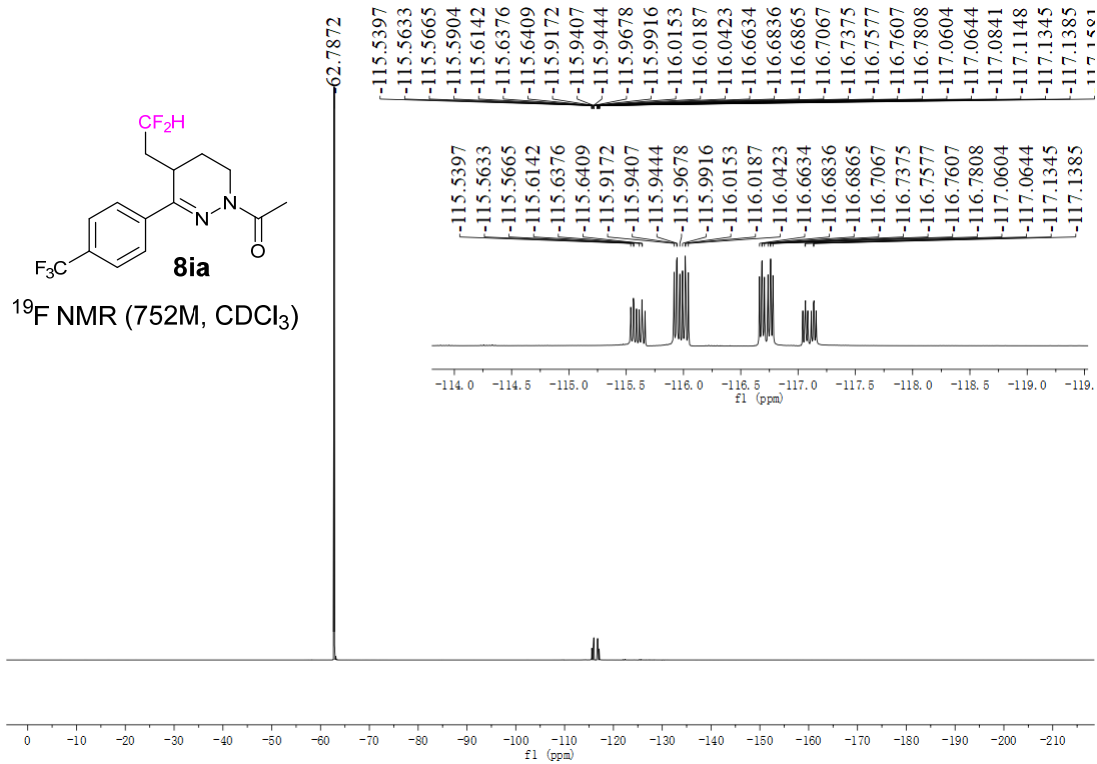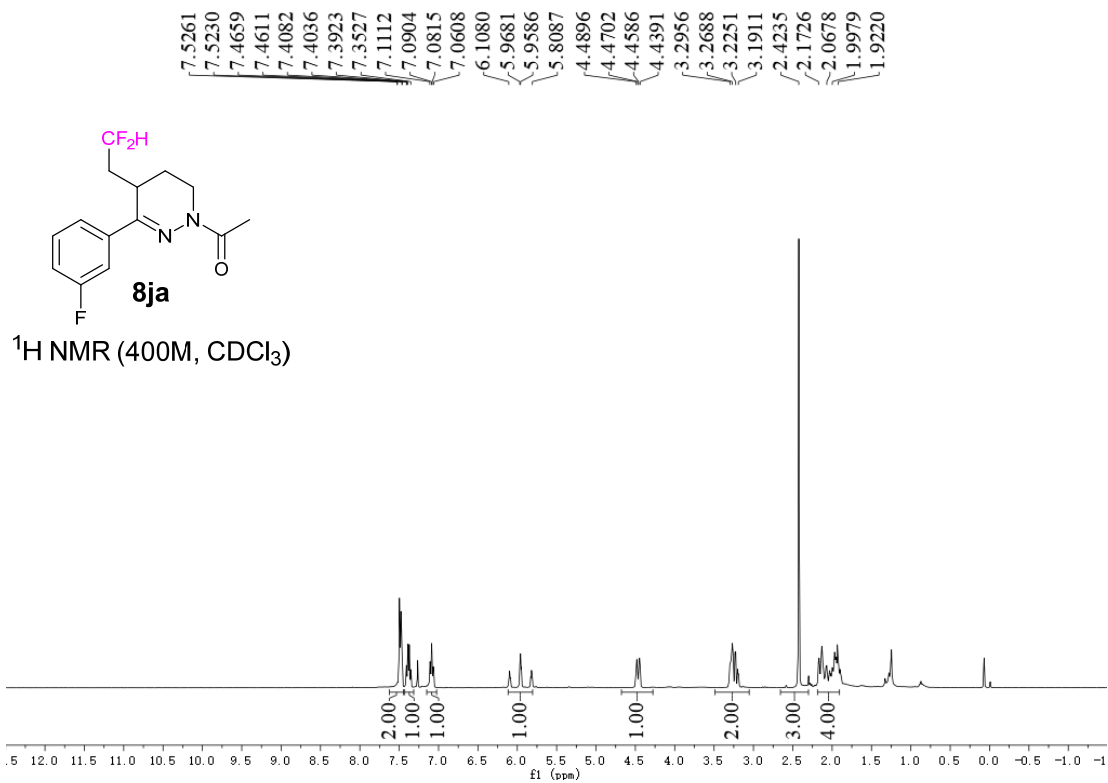

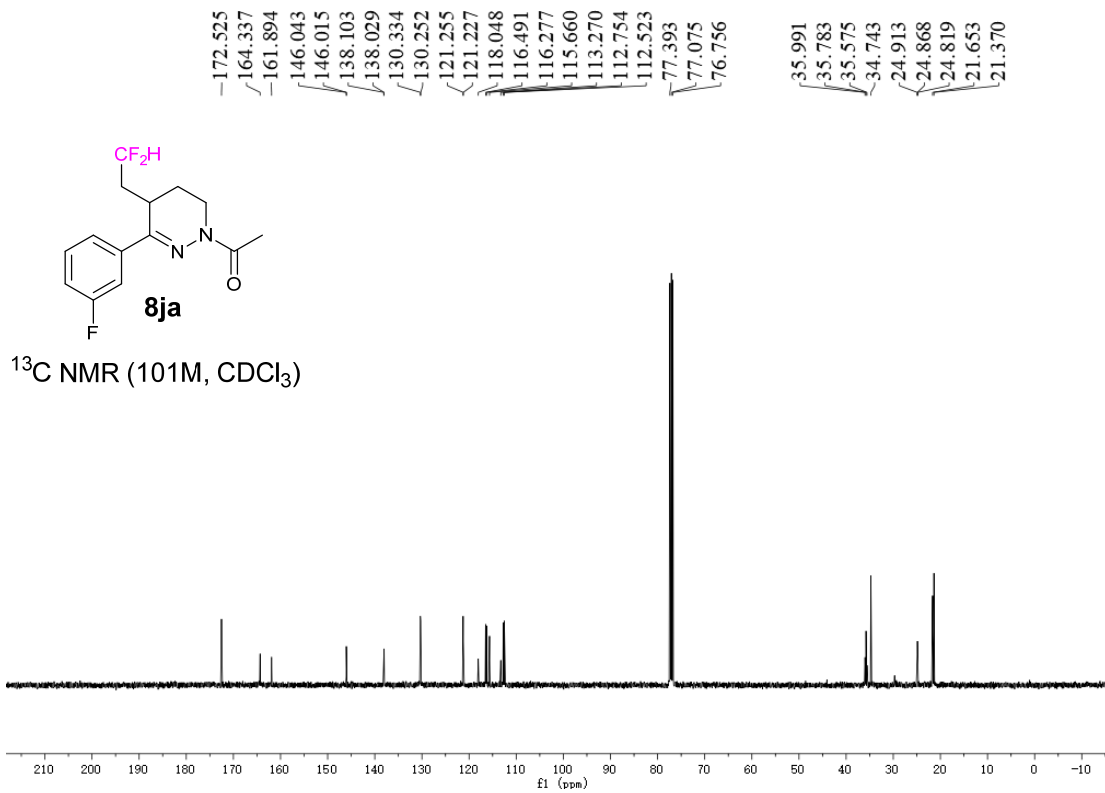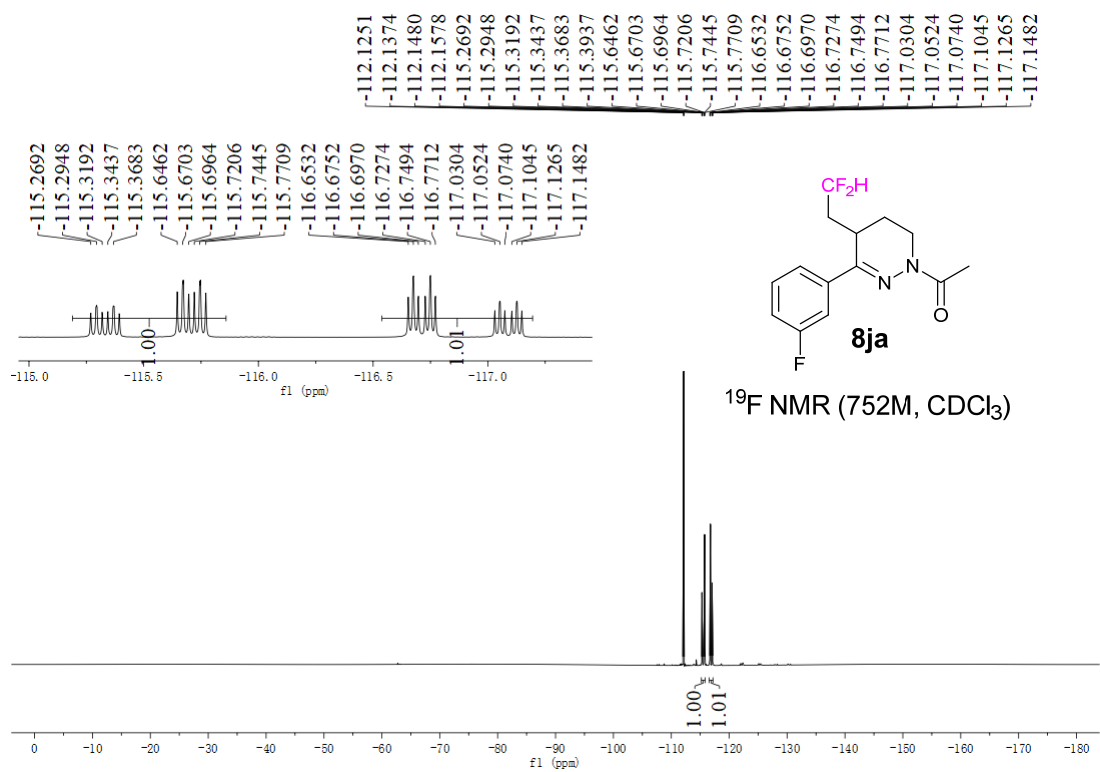

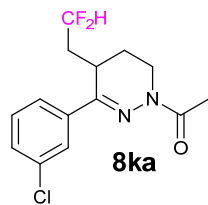

<sup>1</sup>H NMR (400M, CDCl<sub>3</sub>)

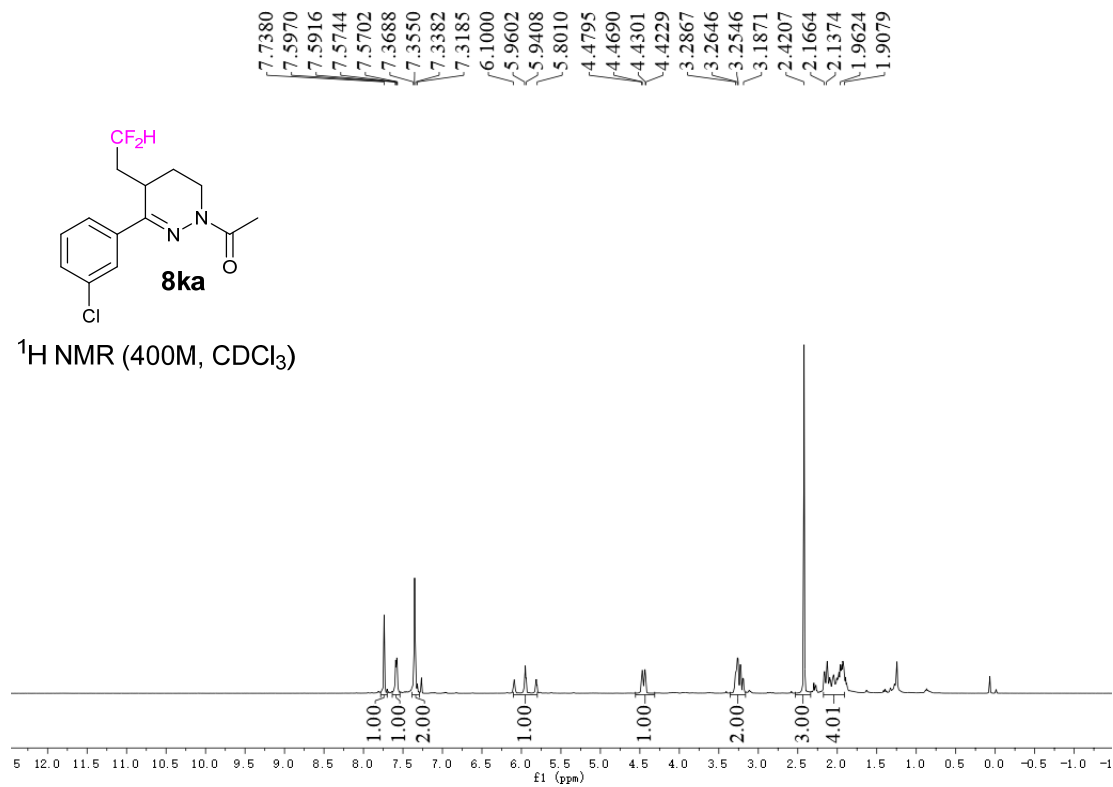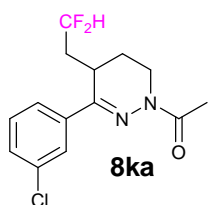

<sup>13</sup>C NMR (101M, CDCl<sub>3</sub>)

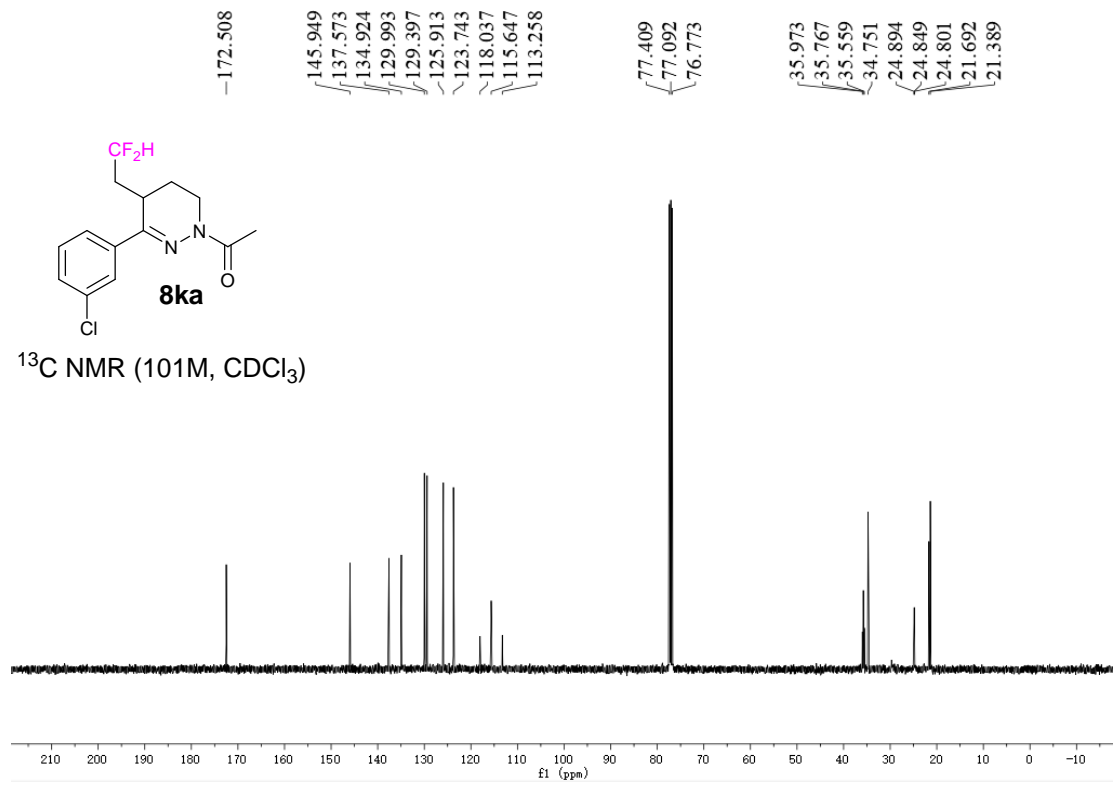



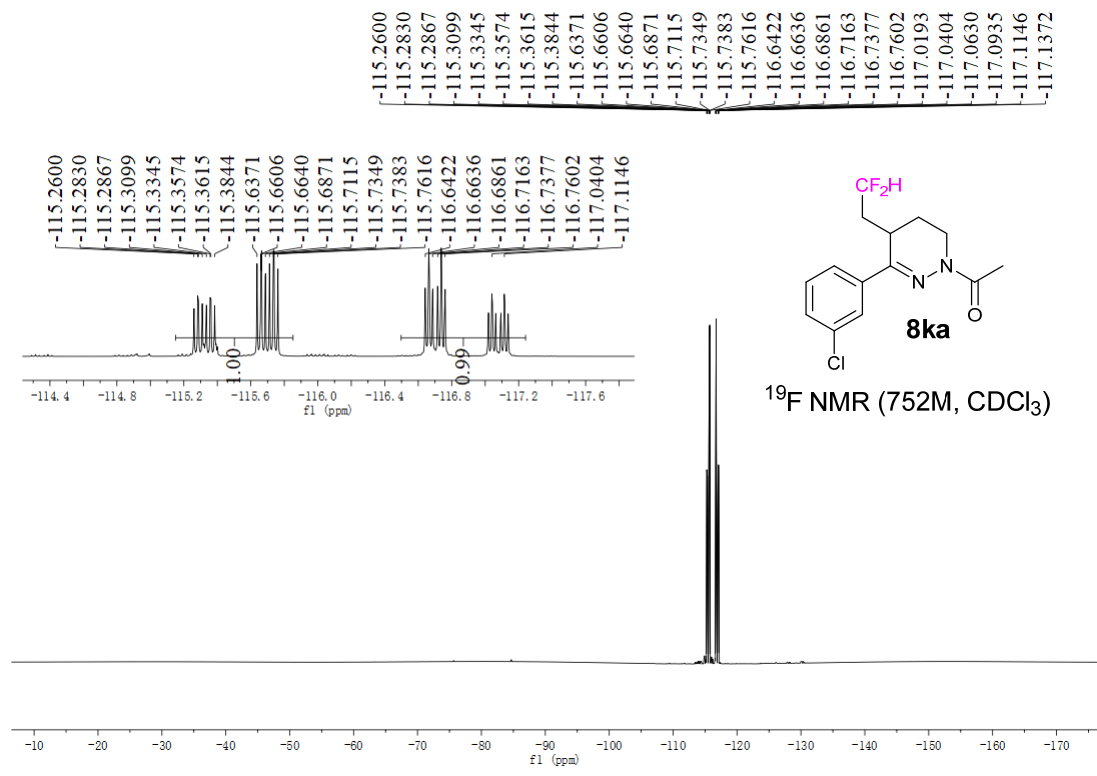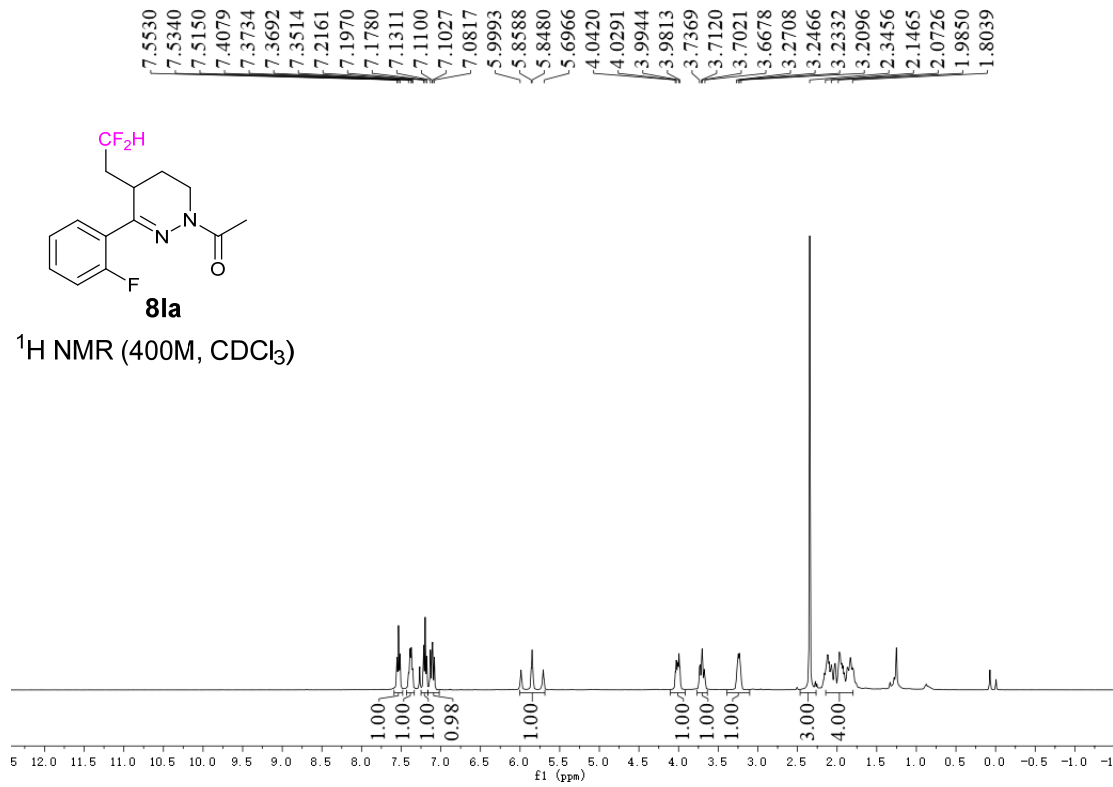

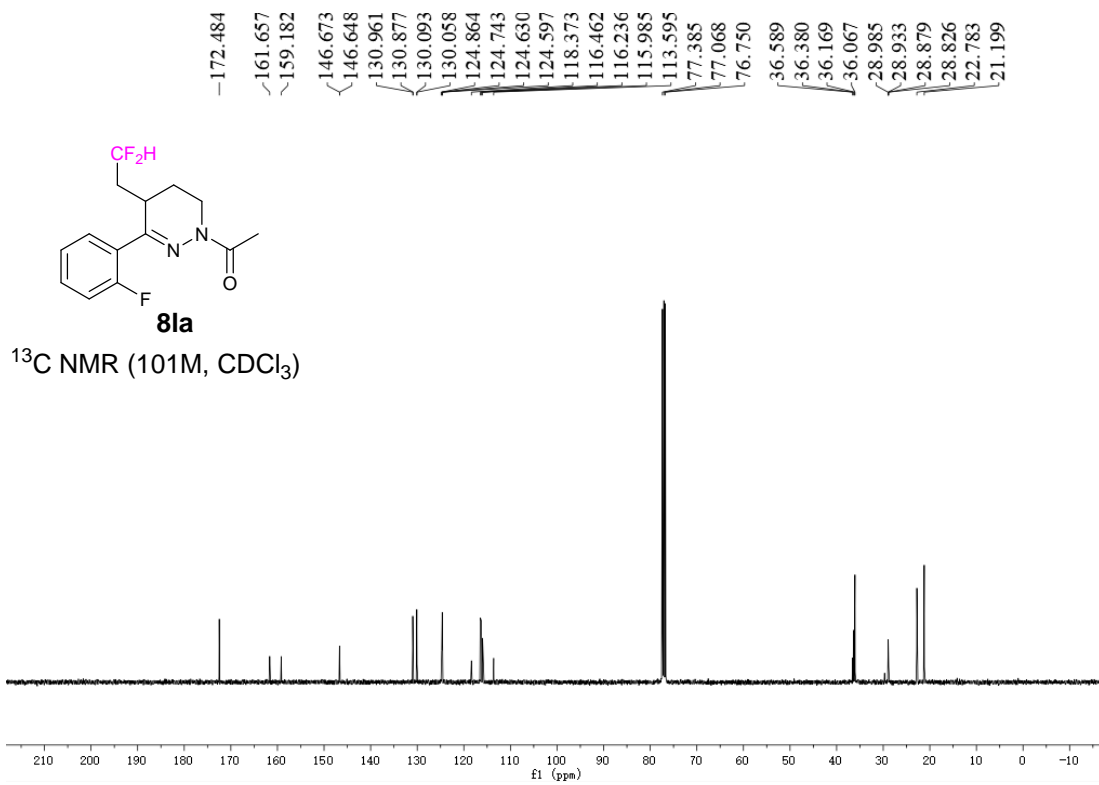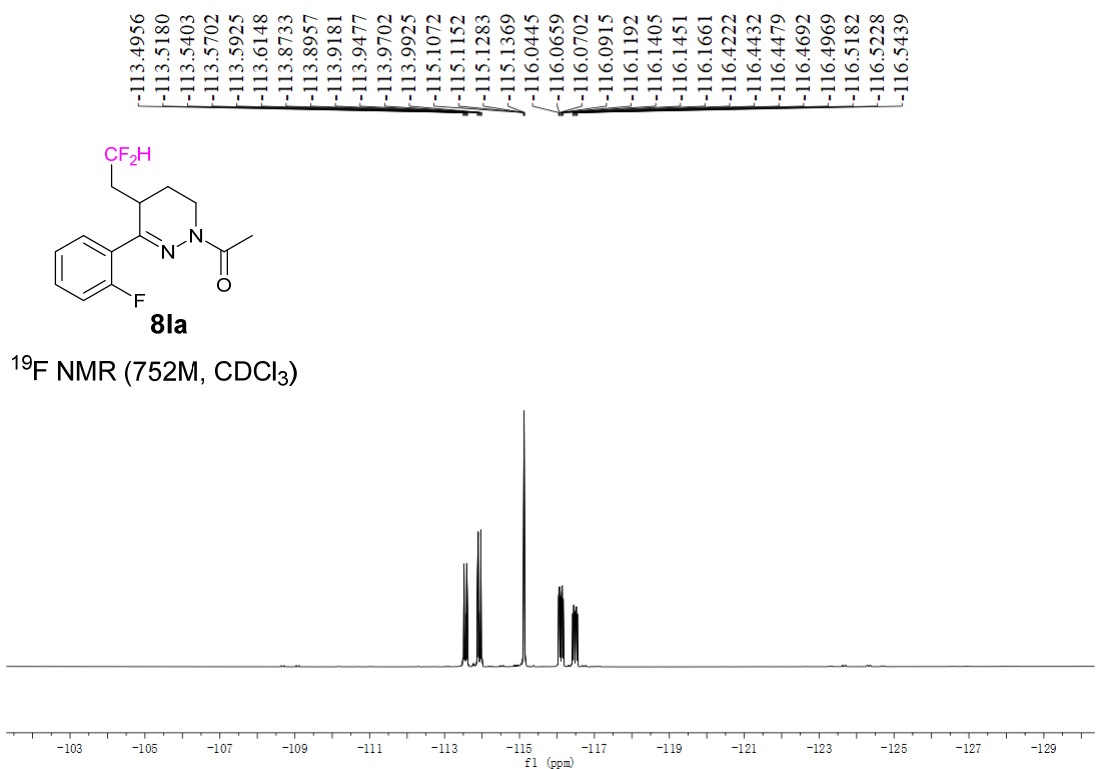

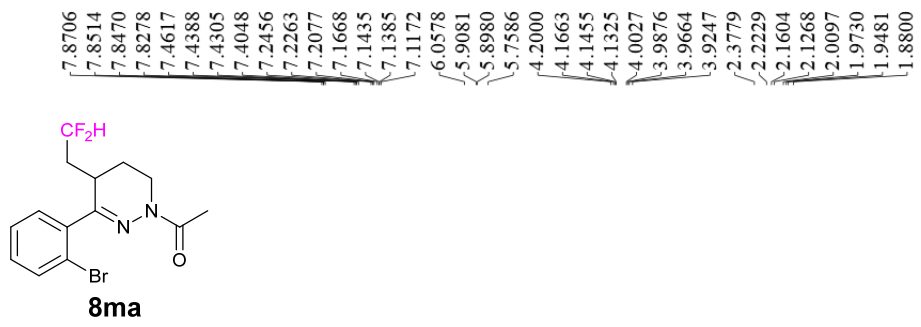

<sup>1</sup>H NMR (400M, CDCl<sub>3</sub>)

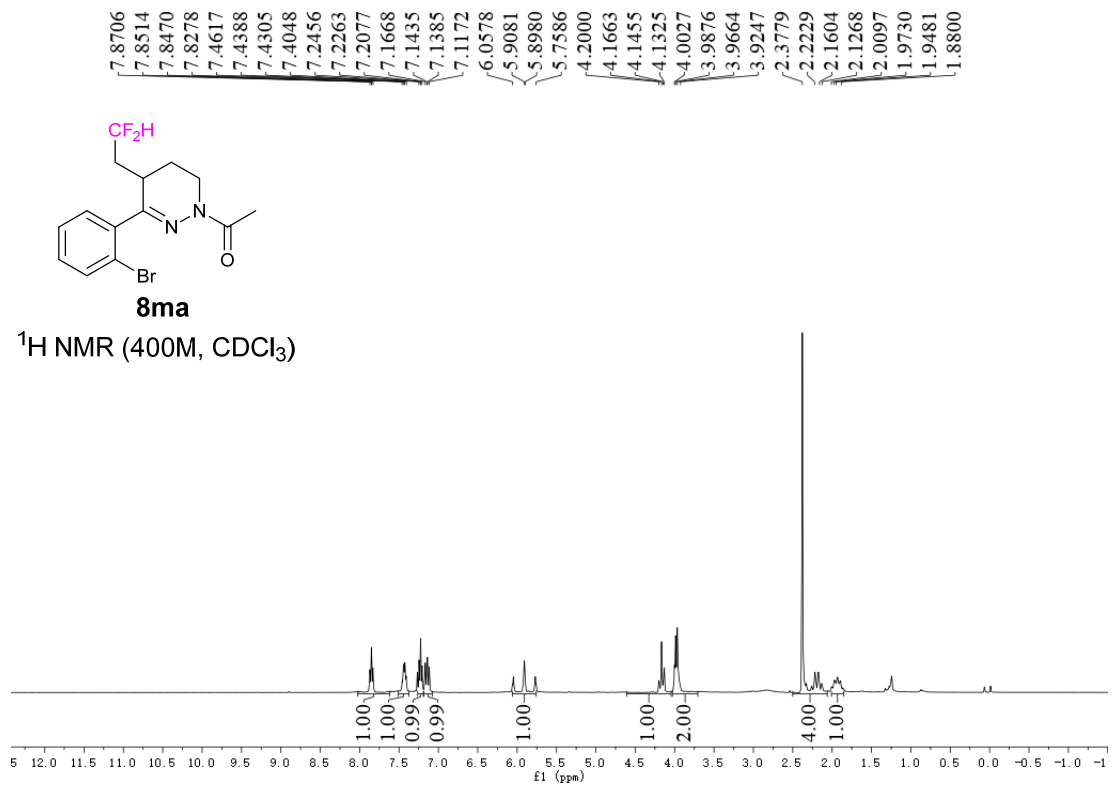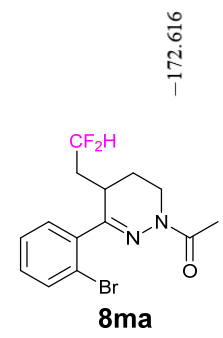

<sup>13</sup>C NMR (101M, CDCl<sub>3</sub>)

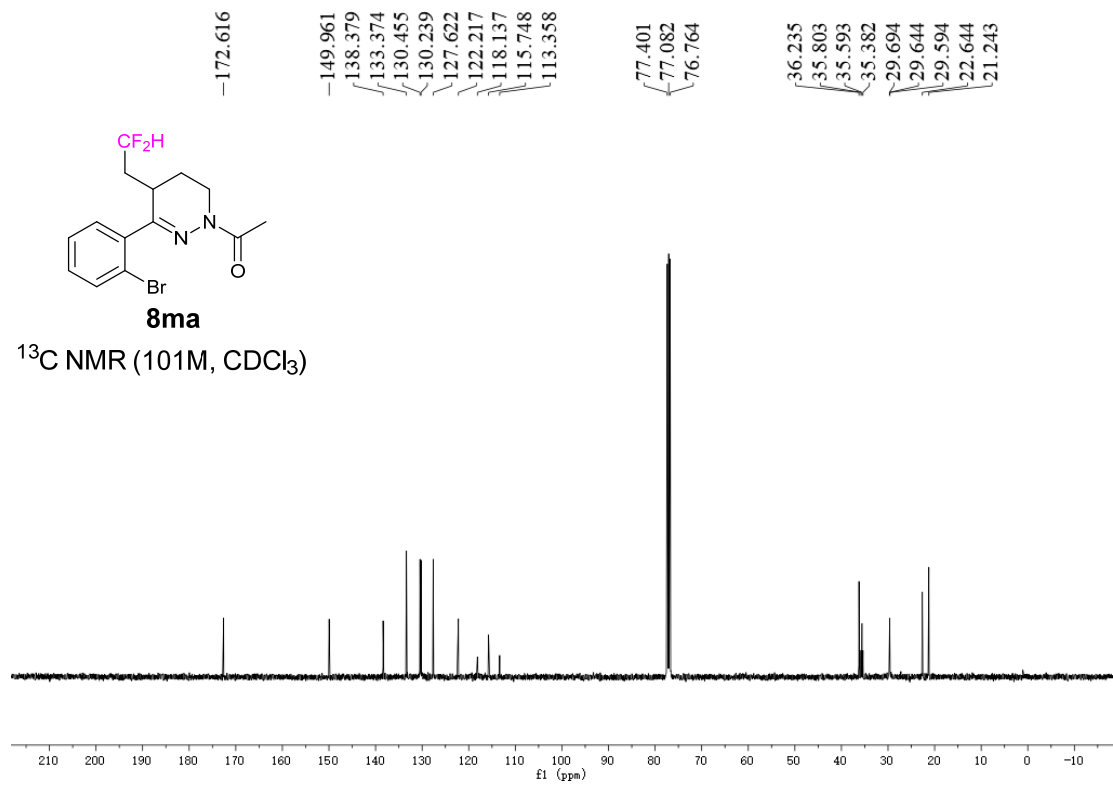

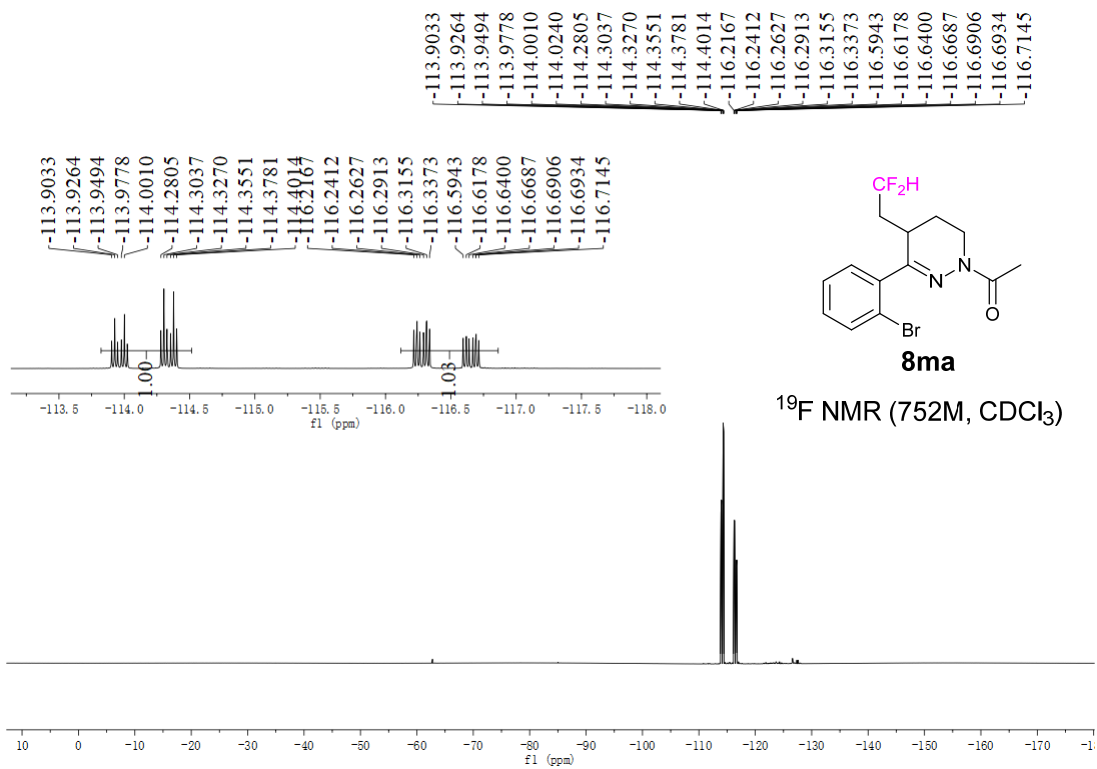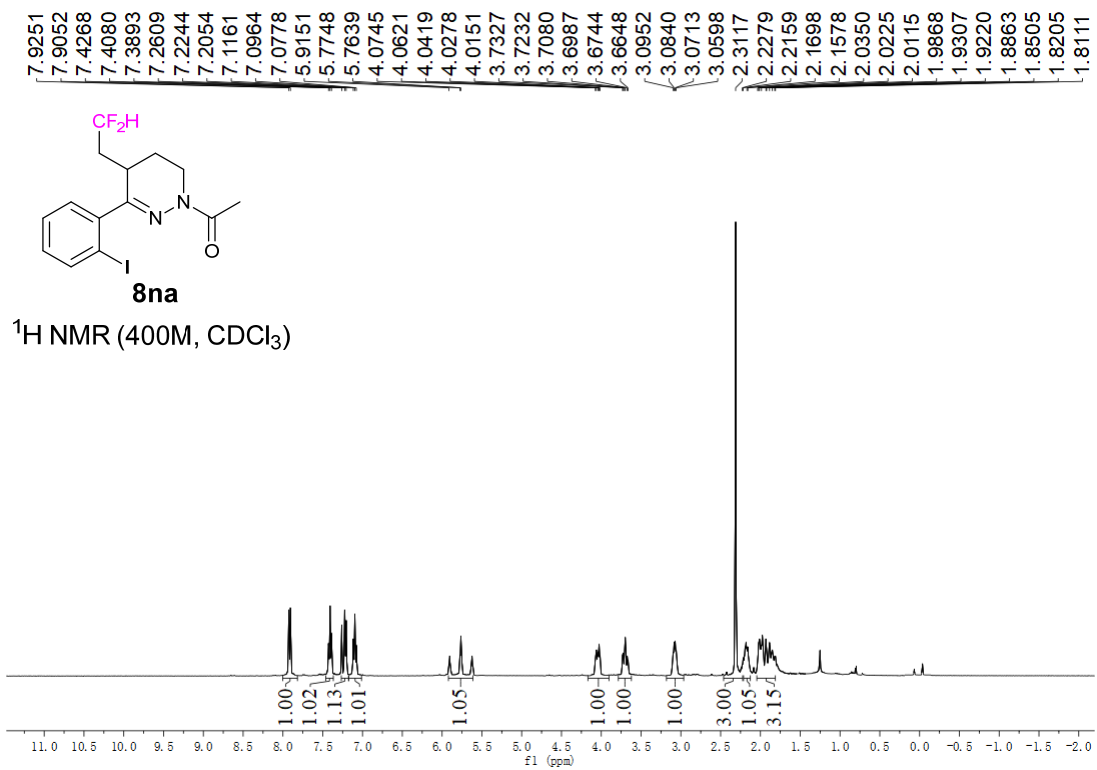

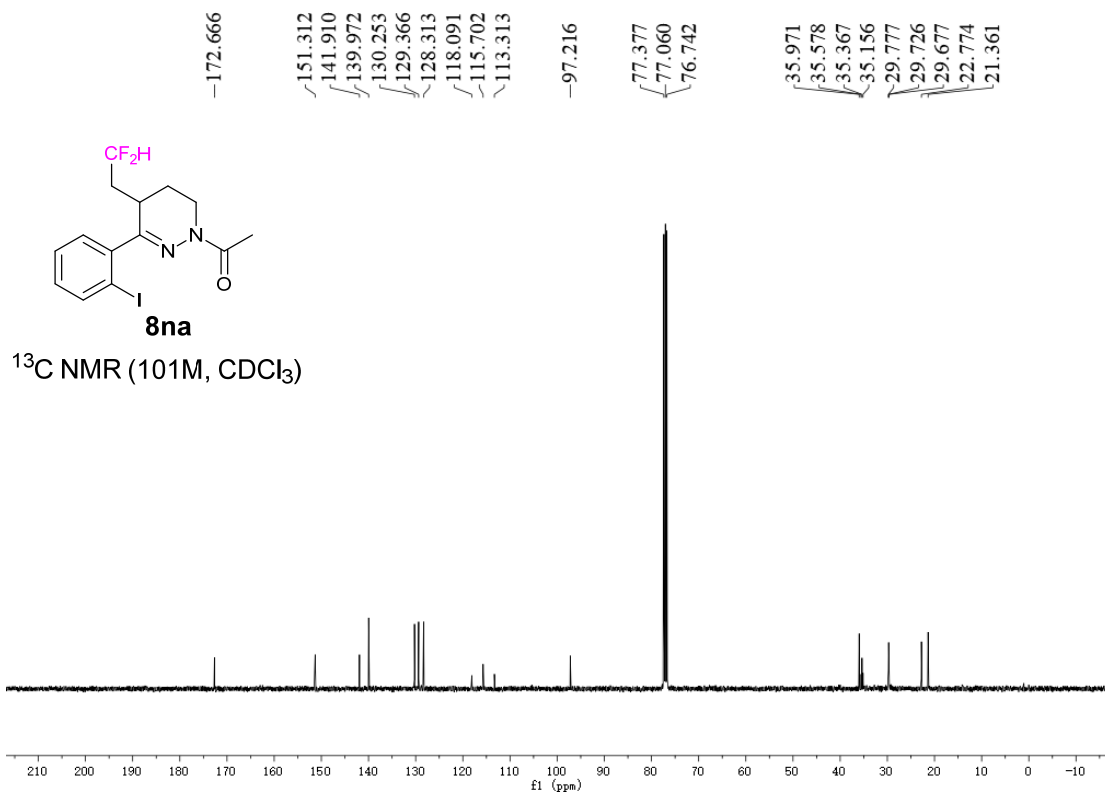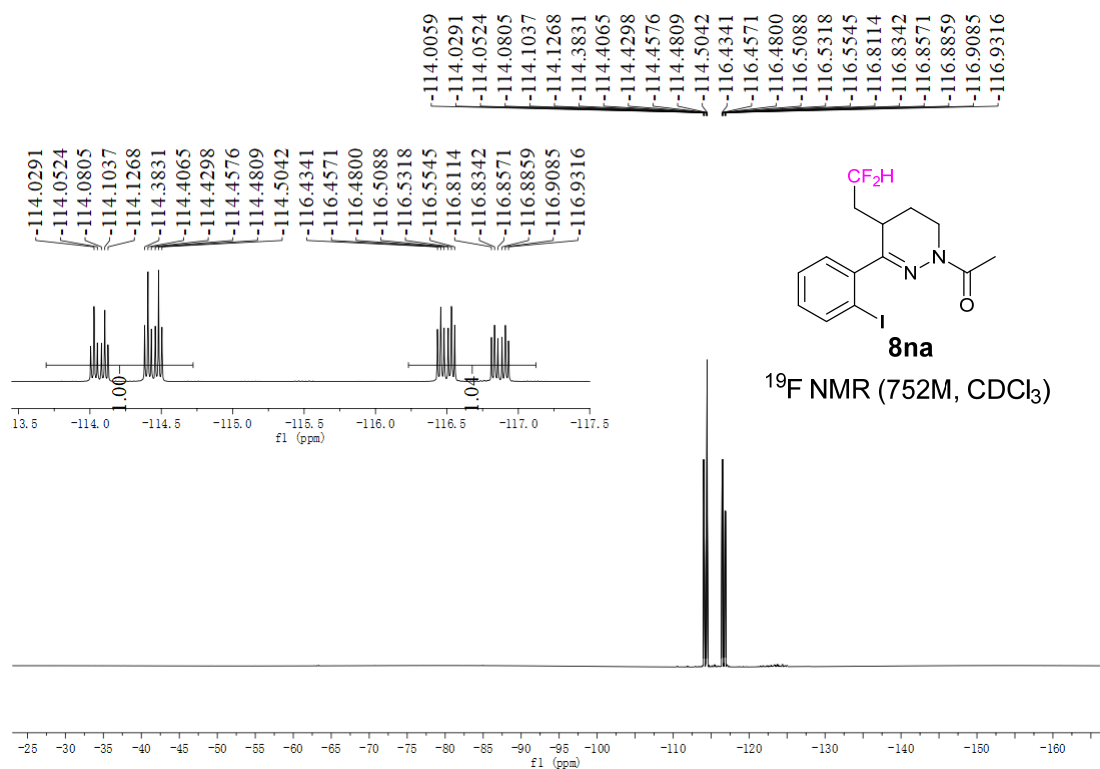

Supplement: d4cc03384a1.pdf [file d4cc03384a1.pdf]
